# Supplementary material for: Genomics of Divergence along a Continuum of Parapatric Population Differentiation
Source: PubMed Central journal article supplement (PMC4334544; doi:10.1371/journal.pgen.1004966), 2015-02-13
Supplement: pgen.1004966.s008.pdf [file pgen.1004966.s008.pdf]

**Table S1.** Summary of sample site information.

| Population ID | Population          | Ecotype | Location                    | Coordinate                         | Width [km]<br>Area [km <sup>2</sup> ]* | Swimming<br>distance [km] | Air line distance<br>[km] | Potential physical barriers for migration<br>from lake to river |
|---------------|---------------------|---------|-----------------------------|------------------------------------|----------------------------------------|---------------------------|---------------------------|-----------------------------------------------------------------|
| G1_R          | Malenter Au         | River   | Schleswig-Holstein, Germany | 54°12'15.08"N, 10°33'41.90"E       | 0.003                                  | 17.596                    | 10.083                    | fish pass at a mile (~3 m height), dam at a mile                |
| G1_L          | Großer Plöner See   | Lake    |                             | 54° 9'21.61"N , 10°25'48.52"E      | 29.169                                 |                           |                           |                                                                 |
| G2_R          | Eider               | River   | Schleswig-Holstein, Germany | 54° 09' 58.07" N, 10° 04' 31.05" E | 0.004                                  | 33.374                    | 15.695                    | dam at mile (~1 m heighth)                                      |
| G2_L          | Westensee           | Lake    |                             | 54°16'39.70"N, 9°55'41.04"E        | 6.943                                  |                           |                           |                                                                 |
| No_R          | Orraelva            | River   | Fusa, Norway                | 60° 15' 19.33"N, 5° 55' 35.68"E    | 0.016                                  | 1.582                     | 1.400                     | waterfall of ~6 m in height                                     |
| No_L          | Skogseidvatnet      | Lake    |                             | 60° 14' 41.57"N, 5° 54' 55.39"E    | 5.325                                  |                           |                           |                                                                 |
| Ca_R          | Misty Stream Inlet  | River   | Vancouver Island, Canada    | 50° 36' 10.40"N, 127° 15' 8.30"W   | 0.010                                  | 0.849                     | 0.743                     | step (~30 cm in height)                                         |
| Ca_L          | Misty Lake          | Lake    |                             | 50° 36' 16.40"N, 127° 15' 42.30"W  | 0.358                                  |                           |                           |                                                                 |
| Us_R          | Little Meadow Creek | River   | Alaska, USA                 | 61° 34' 8.76"N, 149° 45' 36.00"W   | 0.006                                  | 5.040                     | 1.039                     | partially upstream                                              |
| Us_L          | Long Lake           | Lake    |                             | 61° 34' 33.96"N, 149° 46' 25.50"W  | 0.163                                  |                           |                           |                                                                 |

\* width of river at sampling site or surface area of lake
