# Supplementary material for: Genomics of Divergence along a Continuum of Parapatric Population Differentiation
Source: PubMed Central journal article supplement (PMC4334544; doi:10.1371/journal.pgen.1004966), 2015-02-13
Supplement: pgen.1004966.s009.pdf [file pgen.1004966.s009.pdf]

**Table S2.** Summary of sequencing statistics for each individual.

| <b>Population ID</b> | <b>Individual ID</b> | <b>Sex</b> | <b>Raw data (Gbp)</b> | <b>Final depth of coverage</b> |
|----------------------|----------------------|------------|-----------------------|--------------------------------|
| G1_R                 | BS1                  | Female     | 16.1                  | 25.5                           |
|                      | BS3                  | Male       | 20.4                  | 31.7                           |
|                      | BS5                  | Male       | 18.9                  | 26.9                           |
|                      | BS7                  | Female     | 22.7                  | 33.5                           |
|                      | BS9                  | Male       | 16.4                  | 25.2                           |
|                      | BS11                 | Female     | 15.5                  | 22.2                           |
| G1_L                 | BS2                  | Female     | 27.2                  | 34.8                           |
|                      | BS4                  | Male       | 27.6                  | 39.0                           |
|                      | BS6                  | Male       | 24.9                  | 29.6                           |
|                      | BS8                  | Female     | 16.4                  | 25.2                           |
|                      | BS10                 | Female     | 21.2                  | 31.8                           |
|                      | BS12                 | Male       | 15.7                  | 22.4                           |
| G2_R                 | BS13                 | Male       | 19.7                  | 24.0                           |
|                      | BS15                 | Female     | 16.4                  | 21.4                           |
|                      | BS17                 | Male       | 24.1                  | 30.8                           |
|                      | BS19                 | Female     | 19.1                  | 21.9                           |
|                      | BS21                 | Male       | 14.5                  | 21.5                           |
|                      | BS23                 | Female     | 17.1                  | 28.0                           |
| G2_L                 | BS14                 | Female     | 13.7                  | 16.0                           |
|                      | BS16                 | Male       | 15.4                  | 24.3                           |
|                      | BS18                 | Male       | 17.2                  | 22.9                           |
|                      | BS20                 | Female     | 17.5                  | 17.7                           |
|                      | BS22                 | Male       | 13.1                  | 19.1                           |
|                      | BS24                 | Female     | 16.0                  | 23.5                           |
| No_R                 | BS55                 | Male       | 16.7                  | 26.0                           |
|                      | BS57                 | Female     | 15.5                  | 26.7                           |
|                      | BS59                 | Male       | 17.1                  | 23.4                           |
|                      | BS61                 | Female     | 16.6                  | 26.9                           |
|                      | BS63b                | Male       | 19.0                  | 33.7                           |
|                      | BS65                 | Female     | 13.5                  | 21.8                           |
| No_L                 | BS56                 | Male       | 13.2                  | 21.3                           |
|                      | BS58b                | Female     | 16.6                  | 28.7                           |
|                      | BS60                 | Male       | 13.5                  | 15.3                           |
|                      | BS62                 | Male       | 16.0                  | 29.4                           |
|                      | BS64b                | Male       | 19.9                  | 33.0                           |
|                      | BS66                 | Female     | 16.8                  | 28.3                           |
| Ca_R                 | BS43                 | Male       | 15.7                  | 26.1                           |
|                      | BS45                 | Female     | 16.4                  | 29.1                           |
|                      | BS47                 | Male       | 16.0                  | 12.7                           |
|                      | BS49                 | Female     | 21.3                  | 20.6                           |
|                      | BS51                 | Male       | 19.5                  | 13.7                           |
|                      | BS53                 | Female     | 19.1                  | 32.9                           |
| Ca_L                 | BS44                 | Male       | 15.6                  | 12.1                           |
|                      | BS46                 | Female     | 14.7                  | 21.2                           |
|                      | BS48                 | Male       | 15.4                  | 22.6                           |
|                      | BS50b                | Female     | 19.7                  | 29.8                           |
|                      | BS52b                | Male       | 23.6                  | 40.5                           |
|                      | BS54                 | Female     | 17.7                  | 31.1                           |
| Us_R                 | BS31b                | Female     | 15.5                  | 26.7                           |
|                      | BS33                 | Male       | 29.0                  | 42.2                           |
|                      | BS35                 | Female     | 33.1                  | 34.8                           |
|                      | BS37                 | Male       | 25.4                  | 20.7                           |
|                      | BS39                 | Female     | 22.6                  | 22.9                           |
|                      | BS41                 | Male       | 28.6                  | 47.9                           |
| Us_L                 | BS32b                | Female     | 17.9                  | 30.2                           |
|                      | BS34b                | Male       | 13.2                  | 23.1                           |
|                      | BS36b                | Female     | 18.1                  | 30.6                           |
|                      | BS38b                | Male       | 28.1                  | 13.5                           |
|                      | BS40b                | Female     | 26.3                  | 46.3                           |
|                      | BS42b                | Female     | 24.2                  | 37.1                           |
