# Supplementary material for: Genomics of Divergence along a Continuum of Parapatric Population Differentiation
Source: PubMed Central journal article supplement (PMC4334544; doi:10.1371/journal.pgen.1004966), 2015-02-13
Supplement: pgen.1004966.s010.pdf [file pgen.1004966.s010.pdf]

**Table S3.** Summary statistics for each population.

| Population ID | SNPs    | $\pi$  | $N_e$ | $T_D$  | $\Theta$ | $\rho/\Theta$ |
|---------------|---------|--------|-------|--------|----------|---------------|
| G1_R          | 1410448 | 0.0017 | 22032 | 0.5693 | 0.0013   | 4.676         |
| G1_L          | 1599340 | 0.0019 | 25081 | 0.3792 | 0.0015   | 3.639         |
| G2_R          | 1597865 | 0.0019 | 25157 | 0.3321 | 0.0015   | 4.685         |
| G2_L          | 1871737 | 0.0021 | 29255 | 0.1324 | 0.0017   | 5.500         |
| No_R          | 965465  | 0.0012 | 14991 | 0.5461 | 0.0009   | 7.233         |
| No_L          | 1859884 | 0.0021 | 29023 | 0.0922 | 0.0017   | 8.162         |
| Ca_R          | 1710748 | 0.0020 | 26615 | 0.2985 | 0.0016   | 9.786         |
| Ca_L          | 2426796 | 0.0029 | 37607 | 0.3471 | 0.0022   | 4.987         |
| Us_R          | 2979553 | 0.0033 | 45634 | 0.0428 | 0.0027   | 6.732         |
| Us_L          | 2755107 | 0.0031 | 41977 | 0.0601 | 0.0025   | 6.940         |

SNPs with a minor allele frequency above 5% are given.

Nucleotide diversity is given as an average across the autosomes.

Effective population size was estimated on the basis of Watterson's theta evaluated at intergenic regions assuming a mutation rate of  $1.7 \times 10^{-8}$ .
