# Supplementary material for: Genomics of Divergence along a Continuum of Parapatric Population Differentiation
Source: PubMed Central journal article supplement (PMC4334544; doi:10.1371/journal.pgen.1004966), 2015-02-13
Supplement: pgen.1004966.s011.pdf [file pgen.1004966.s011.pdf]

**Table S4.** Summary statistics for each population pair.

| Population-pair ID | SNPs    | $F_{ST}$ | $D_{xy}$ | $D_f$ (autosomes) | $D_f$ (divergent regions) |
|--------------------|---------|----------|----------|-------------------|---------------------------|
| G1                 | 815073  | 0.2229   | 0.0022   | 1838              | 551                       |
| G2                 | 797275  | 0.1147   | 0.0022   | 256               | 219                       |
| No                 | 691957  | 0.2173   | 0.0019   | 178               | 94                        |
| Ca                 | 1201431 | 0.2781   | 0.0031   | 4405              | 2049                      |
| Us                 | 1227732 | 0.0949   | 0.0034   | 480               | 451                       |

SNPs with a minor allele frequency above 25% are given to exclude uninformative sites.

$D_f$ : fixed differences
