# Supplementary material for: Genomics of Divergence along a Continuum of Parapatric Population Differentiation
Source: PubMed Central journal article supplement (PMC4334544; doi:10.1371/journal.pgen.1004966), 2015-02-13
Supplement: pgen.1004966.s012.pdf [file pgen.1004966.s012.pdf]

**Table S5.** Annotations for 47 shared outlier windows.

| LG       | Start    | End      | Outlier in Us | Outlier in G2 | Outlier in No | Outlier in G1 | Outlier in Ca | # populations | # genes | Gene ID                                   | Gene name               | Gene function                                                                                                                                                               |
|----------|----------|----------|---------------|---------------|---------------|---------------|---------------|---------------|---------|-------------------------------------------|-------------------------|-----------------------------------------------------------------------------------------------------------------------------------------------------------------------------|
| groupI   | 10820000 | 10830000 | 0             | 0             | No            | G1            | 0             | 2             | 2       | ENSGACG00000010386;<br>ENSGACG00000010389 | C3orf33; MED13 (2 of 2) | nucleic acid binding, hydrolase activity, acting on ester bonds; regulation of transcription from RNA polymerase II promoter, mediator complex                              |
| groupI   | 17590000 | 17600000 | 0             | 0             | No            | G1            | 0             | 2             | 0       | -                                         | -                       | -                                                                                                                                                                           |
| groupI   | 21970000 | 21980000 | 0             | G2            | 0             | G1            | 0             | 2             | 1       | ENSGACG00000014407                        | -                       | nucleic acid binding, ATP binding, helicase activity, ATP-dependent helicase activity                                                                                       |
| groupII  | 130000   | 140000   | 0             | G2            | 0             | G1            | 0             | 2             | 1       | ENSGACG00000013938                        | FAM108C1                | hydrolase activity                                                                                                                                                          |
| groupII  | 12630000 | 12640000 | 0             | G2            | No            | 0             | 0             | 2             | 1       | ENSGACG00000015990                        | -                       | -                                                                                                                                                                           |
| groupIII | 10260000 | 10270000 | 0             | 0             | 0             | G1            | Ca            | 2             | 0       | -                                         | -                       | -                                                                                                                                                                           |
| groupIV  | 7070000  | 7080000  | 0             | 0             | No            | G1            | 0             | 2             | 0       | -                                         | -                       | -                                                                                                                                                                           |
| groupIV  | 7080000  | 7090000  | 0             | 0             | No            | G1            | 0             | 2             | 0       | -                                         | -                       | -                                                                                                                                                                           |
| groupIV  | 7090000  | 7100000  | 0             | G2            | No            | G1            | 0             | 3             | 0       | -                                         | -                       | -                                                                                                                                                                           |
| groupIV  | 11580000 | 11590000 | Us            | 0             | No            | 0             | 0             | 2             | 0       | -                                         | -                       | -                                                                                                                                                                           |
| groupIV  | 13330000 | 13340000 | Us            | 0             | 0             | G1            | 0             | 2             | 2       | ENSGACG00000018357;<br>ENSGACG00000018359 | RMND5B; N4BP3           | protein binding, protein binding, protein binding; -                                                                                                                        |
| groupIV  | 13940000 | 13950000 | Us            | 0             | No            | 0             | 0             | 2             | 0       | -                                         | -                       | -                                                                                                                                                                           |
| groupIV  | 19510000 | 19520000 | Us            | 0             | 0             | 0             | Ca            | 2             | 1       | ENSGACG00000018927                        | -                       | -                                                                                                                                                                           |
| groupIV  | 19520000 | 19530000 | Us            | 0             | 0             | G1            | Ca            | 3             | 0       | -                                         | -                       | -                                                                                                                                                                           |
| groupIV  | 19530000 | 19540000 | Us            | 0             | 0             | 0             | Ca            | 2             | 0       | -                                         | -                       | -                                                                                                                                                                           |
| groupIV  | 23190000 | 23200000 | NA            | G2            | No            | 0             | NA            | 2             | 1       | ENSGACG00000019249                        | AEBP2 (2 of 2)          | intracellular, zinc ion binding                                                                                                                                             |
| groupIX  | 9250000  | 9260000  | 0             | G2            | 0             | G1            | 0             | 2             | 1       | ENSGACG00000017985                        | CTNNA2                  | cell adhesion, actin cytoskeleton, structural molecule activity                                                                                                             |
| groupIX  | 9410000  | 9420000  | 0             | G2            | No            | 0             | 0             | 2             | 2       | ENSGACG00000017996;<br>ENSGACG00000018001 | -; -                    | G-protein coupled receptor signaling pathway, integral to membrane; -                                                                                                       |
| groupIX  | 11880000 | 11890000 | 0             | G2            | No            | 0             | 0             | 2             | 0       | -                                         | -                       | -                                                                                                                                                                           |
| groupIX  | 15080000 | 15090000 | 0             | G2            | 0             | G1            | 0             | 2             | 2       | ENSGACG00000018992;<br>ENSGACG00000018993 | SLC25A41; -             | calcium ion binding, protein binding, calcium ion binding, protein binding; signal transducer activity                                                                      |
| groupIX  | 15090000 | 15100000 | 0             | G2            | 0             | G1            | 0             | 2             | 2       | ENSGACG00000018994;<br>ENSGACG00000018995 | C19orf53; MRI1          | -; cellular metabolic process, cellular biosynthetic process                                                                                                                |
| groupVII | 13310000 | 13320000 | Us            | G2            | 0             | 0             | 0             | 2             | 1       | ENSGACG00000020196                        | WNT11                   | multicellular organismal development, Wnt receptor signaling pathway, calcium modulating pathway, cell migration involved in gastrulation, heart development, extracellular |
| groupVII | 14210000 | 14220000 | Us            | 0             | 0             | G1            | 0             | 2             | 1       | ENSGACG00000020216                        | CLTC                    | intracellular protein transport, vesicle-mediated transport, clathrin coat of trans-Golgi network vesicle, clathrin coat of coated pit, binding, structural molecule activi |
| groupVII | 18610000 | 18620000 | Us            | G2            | 0             | 0             | 0             | 2             | 1       | ENSGACG00000020440                        | RBM14 (2 of 2)          | nucleic acid binding                                                                                                                                                        |
| groupVII | 18620000 | 18630000 | 0             | G2            | 0             | G1            | 0             | 2             | 1       | ENSGACG00000020441                        | DPP3                    | proteolysis, cytoplasm, dipeptidyl-peptidase activity                                                                                                                       |

|            |          |          |    |    |    |    |    |   |   |                                                                                                                                       |                                            |                                                                                                                                                                                                     |
|------------|----------|----------|----|----|----|----|----|---|---|---------------------------------------------------------------------------------------------------------------------------------------|--------------------------------------------|-----------------------------------------------------------------------------------------------------------------------------------------------------------------------------------------------------|
| groupVII   | 19250000 | 19260000 | Us | 0  | No | 0  | 0  | 2 | 6 | ENSGACG00000020493;<br>ENSGACG00000020494;<br>ENSGACG00000022599;<br>ENSGACG00000022586;<br>ENSGACG00000022642;<br>ENSGACG00000020495 | GBAS (2 of 2); CCT6A;<br>NA; NA; NA; SUMF2 | metabolic process, transferase activity, folic acid binding; protein folding, cellular protein metabolic process, ATP binding, unfolded protein binding, protein folding, cell                      |
| groupVII   | 21410000 | 21420000 | Us | 0  | 0  | 0  | Ca | 2 | 1 | ENSGACG00000020612                                                                                                                    | -                                          | transmembrane transport, drug transmembrane transport, membrane, drug transmembrane transporter activity, antiporter activity, transmembrane transport, drug transmembrane t                        |
| groupVII   | 21430000 | 21440000 | Us | NA | 0  | 0  | Ca | 2 | 1 | ENSGACG00000020613                                                                                                                    | -                                          | transmembrane transport, drug transmembrane transport, membrane, drug transmembrane transporter activity, antiporter activity, transmembrane transport, drug transmembrane t                        |
| groupVIII  | 11870000 | 11880000 | Us | G2 | 0  | 0  | 0  | 2 | 0 | -                                                                                                                                     | -                                          | -                                                                                                                                                                                                   |
| groupX     | 6530000  | 6540000  | 0  | G2 | 0  | G1 | 0  | 2 | 1 | ENSGACG00000004219                                                                                                                    | BCAN (2 of 2)                              | cell adhesion, calcium ion binding, binding, protein binding, hyaluronic acid binding                                                                                                               |
| groupX     | 15480000 | 15490000 | 0  | G2 | 0  | 0  | Ca | 2 | 1 | ENSGACG00000010362                                                                                                                    | -                                          | protein phosphorylation, ATP binding, protein kinase activity, transferase activity, transferring phosphorus-containing groups, protein serine/threonine kinase activity                            |
| groupXI    | 1820000  | 1830000  | 0  | G2 | 0  | NA | Ca | 2 | 0 | -                                                                                                                                     | -                                          | -                                                                                                                                                                                                   |
| groupXI    | 5550000  | 5560000  | Us | G2 | 0  | 0  | 0  | 2 | 0 | -                                                                                                                                     | -                                          | -                                                                                                                                                                                                   |
| groupXII   | 12140000 | 12150000 | Us | 0  | 0  | 0  | Ca | 2 | 1 | ENSGACG00000009758                                                                                                                    | TEAD3 (2 of 2)                             | regulation of transcription, DNA-dependent, nucleus, sequence-specific DNA binding transcription factor activity, protein binding                                                                   |
| groupXIII  | 7980000  | 7990000  | Us | 0  | No | 0  | 0  | 2 | 1 | ENSGACG00000007925                                                                                                                    | VPS13A                                     | protein localization                                                                                                                                                                                |
| groupXIII  | 7990000  | 8000000  | Us | 0  | No | 0  | 0  | 2 | 1 | ENSGACG00000007925                                                                                                                    | VPS13A                                     | protein localization                                                                                                                                                                                |
| groupXIII  | 9210000  | 9220000  | Us | 0  | 0  | G1 | 0  | 2 | 1 | ENSGACG00000009222                                                                                                                    | ACACB                                      | metabolic process, fatty acid biosynthetic process, ATP binding, catalytic activity, ligase activity, acetyl-CoA carboxylase activity                                                               |
| groupXIII  | 10660000 | 10670000 | 0  | 0  | 0  | G1 | Ca | 2 | 2 | ENSGACG00000010293;<br>ENSGACG00000010296                                                                                             | WDR54; NOL6                                | protein binding; pathogenesis, RNA binding, hydrolase activity, acting on ester bonds, ribosome binding                                                                                             |
| groupXVIII | 6210000  | 6220000  | Us | G2 | 0  | 0  | 0  | 2 | 1 | ENSGACG00000007328                                                                                                                    | HADHB                                      | metabolic process, catalytic activity, transferase activity, transferring acyl groups other than amino-acyl groups                                                                                  |
| groupXX    | 8890000  | 8900000  | 0  | 0  | NA | G1 | Ca | 2 | 2 | ENSGACG00000007563;<br>ENSGACG00000007569                                                                                             | -; -                                       | regulation of Rab GTPase activity, intracellular, Rab GTPase activator activity; -                                                                                                                  |
| groupXX    | 9120000  | 9130000  | 0  | G2 | 0  | G1 | 0  | 2 | 1 | ENSGACG00000007711                                                                                                                    | NPHS1                                      | skeletal muscle fiber development, kidney development, protein binding                                                                                                                              |
| groupXX    | 9690000  | 9700000  | Us | G2 | 0  | 0  | 0  | 2 | 1 | ENSGACG00000008221                                                                                                                    | TAX1BP1 (1 of 2)                           | -                                                                                                                                                                                                   |
| groupXX    | 9700000  | 9710000  | Us | G2 | 0  | 0  | 0  | 2 | 2 | ENSGACG00000008229;<br>ENSGACG00000008221                                                                                             | HIBADH (2 of 2);<br>TAX1BP1 (1 of 2)       | oxidation-reduction process, valine metabolic process, pentose-phosphate shunt, NAD binding, 3-hydroxyisobutyrate dehydrogenase activity, phosphogluconate dehydrogenase (decarboxylating) activity |

|          |          |          |    |    |    |    |   |   |   |                                                                                  |                                                                                                                                                                                               |
|----------|----------|----------|----|----|----|----|---|---|---|----------------------------------------------------------------------------------|-----------------------------------------------------------------------------------------------------------------------------------------------------------------------------------------------|
| groupXX  | 12510000 | 12520000 | 0  | 0  | No | G1 | 0 | 2 | 3 | ENSGACG00000011540; SPHK2; -; RPL18<br>ENSGACG00000011594;<br>ENSGACG00000011547 | protein kinase C-activating G-protein coupled<br>receptor signaling pathway, diacylglycerol kinase<br>activity; integral to membrane; translation,<br>intracellular, ribosome, structural con |
| groupXX  | 16020000 | 16030000 | 0  | G2 | 0  | G1 | 0 | 2 | 1 | ENSGACG00000013259 RAB11A                                                        | regulation of transcription, DNA-dependent,<br>signal transduction, GTP catabolic process, small<br>GTPase mediated signal transduction,<br>intracellular protein transport, nucleocytoplasm  |
| groupXXI | 1520000  | 1530000  | Us | 0  | 0  | G1 | 0 | 2 | 0 | -                                                                                | -                                                                                                                                                                                             |
| groupXXI | 4530000  | 4540000  | Us | 0  | NA | G1 | 0 | 2 | 1 | ENSGACG00000002390                                                               | CTNND2 (2 of 2)<br>binding, protein binding                                                                                                                                                   |

Windows are denoted with population ID if they are an outlier window in the respective population comparison, 0 indicates no outlier status, and NA indicates no sequence polymorphism in the respective window and population comparison.
