# Supplementary material for: Genomics of Divergence along a Continuum of Parapatric Population Differentiation
Source: PubMed Central journal article supplement (PMC4334544; doi:10.1371/journal.pgen.1004966), 2015-02-13
Supplement: pgen.1004966.s013.pdf [file pgen.1004966.s013.pdf]

**Table S6.** Annotations for 794 divergent regions.

| LG      | Start    | End      | Population | Type | Gene ID            | Gene name         | Gene function                                                                                                                                                                                                                                                                                                                                                                                                                                |
|---------|----------|----------|------------|------|--------------------|-------------------|----------------------------------------------------------------------------------------------------------------------------------------------------------------------------------------------------------------------------------------------------------------------------------------------------------------------------------------------------------------------------------------------------------------------------------------------|
| groupI  | 8419280  | 8457378  | G2         | bg   | -                  | -                 | -                                                                                                                                                                                                                                                                                                                                                                                                                                            |
| groupI  | 10970914 | 11009914 | G2         | psL  | ENSGACG00000010514 | -                 | -                                                                                                                                                                                                                                                                                                                                                                                                                                            |
| groupI  | 10970914 | 11009914 | G2         | psL  | ENSGACG00000010517 | HSPA8 (2 of 2)    | -                                                                                                                                                                                                                                                                                                                                                                                                                                            |
| groupI  | 10970914 | 11009914 | G2         | psL  | ENSGACG00000010543 | -                 | membrane, integral to membrane                                                                                                                                                                                                                                                                                                                                                                                                               |
| groupI  | 10970914 | 11009914 | G2         | psL  | ENSGACG00000010497 | SYTL2 (2 of 2)    | intracellular protein transport, protein binding, Rab GTPase binding                                                                                                                                                                                                                                                                                                                                                                         |
| groupI  | 10970914 | 11009914 | G2         | psL  | ENSGACG00000010555 | -                 | protein binding                                                                                                                                                                                                                                                                                                                                                                                                                              |
| groupI  | 11536487 | 11604487 | G2         | bg   | ENSGACG00000010795 | -                 | intracellular signal transduction, protein binding                                                                                                                                                                                                                                                                                                                                                                                           |
| groupI  | 11536487 | 11604487 | G2         | bg   | ENSGACG00000010797 | SAMD4B            | binding, protein binding, binding, protein binding                                                                                                                                                                                                                                                                                                                                                                                           |
| groupI  | 11536487 | 11604487 | G2         | bg   | ENSGACG00000010818 | PAF1              | Cdc73/Paf1 complex                                                                                                                                                                                                                                                                                                                                                                                                                           |
| groupI  | 12513891 | 12549891 | G2         | psL  | ENSGACG00000011343 | RRP8              | metabolic process, methyltransferase activity                                                                                                                                                                                                                                                                                                                                                                                                |
| groupI  | 12513891 | 12549891 | G2         | psL  | ENSGACG00000011369 | APBB1             | -                                                                                                                                                                                                                                                                                                                                                                                                                                            |
| groupI  | 12513891 | 12549891 | G2         | psL  | ENSGACG00000011342 | -                 | -                                                                                                                                                                                                                                                                                                                                                                                                                                            |
| groupI  | 12513891 | 12549891 | G2         | psL  | ENSGACG00000011346 | ILK (1 of 2)      | protein phosphorylation, ATP binding, protein kinase activity, protein binding, transferase activity, transferring phosphorus-containing groups, protein serine/threonine kinase activity                                                                                                                                                                                                                                                    |
| groupI  | 14756748 | 14768748 | G2         | psR  | ENSGACG00000012128 | MAML2             | -                                                                                                                                                                                                                                                                                                                                                                                                                                            |
| groupI  | 16278408 | 16314408 | G2         | n    | ENSGACG00000012634 | GPR4              | G-protein coupled receptor signaling pathway, integral to membrane                                                                                                                                                                                                                                                                                                                                                                           |
| groupI  | 16278408 | 16314408 | G2         | n    | ENSGACG00000012628 | -                 | RNA binding                                                                                                                                                                                                                                                                                                                                                                                                                                  |
| groupI  | 18371588 | 18386686 | G2         | psR  | ENSGACG00000013496 | -                 | oxidation-reduction process, metabolic process, oxidoreductase activity, oxidation-reduction process, metabolic process, oxidoreductase activity                                                                                                                                                                                                                                                                                             |
| groupI  | 18371588 | 18386686 | G2         | psR  | ENSGACG00000013509 | -                 | oxidation-reduction process, metabolic process, oxidoreductase activity                                                                                                                                                                                                                                                                                                                                                                      |
| groupI  | 19806765 | 19854765 | G2         | psR  | ENSGACG00000013701 | -                 | -                                                                                                                                                                                                                                                                                                                                                                                                                                            |
| groupI  | 21957552 | 21995029 | G2         | n    | ENSGACG00000014396 | TGDS              | cellular metabolic process, biosynthetic process, steroid biosynthetic process, extracellular polysaccharide biosynthetic process, catalytic activity, coenzyme binding, 3-beta-hydroxy-delta5-steroid dehydrogenase activity, dTDP-4-dehydrorhamnose reductase activity                                                                                                                                                                     |
| groupI  | 21957552 | 21995029 | G2         | n    | ENSGACG00000014388 | GPR180            | mitochondrial respiratory chain, electron carrier activity, cytochrome-c oxidase activity                                                                                                                                                                                                                                                                                                                                                    |
| groupI  | 21957552 | 21995029 | G2         | n    | ENSGACG00000014407 | -                 | nucleic acid binding, ATP binding, helicase activity, ATP-dependent helicase activity                                                                                                                                                                                                                                                                                                                                                        |
| groupI  | 21957552 | 21995029 | G2         | n    | ENSGACG00000014419 | PTGFRN            | protein binding                                                                                                                                                                                                                                                                                                                                                                                                                              |
| groupI  | 24819830 | 24846830 | G2         | bg   | ENSGACG00000015056 | IL1RAPL1 (1 of 2) | signal transduction, innate immune response, intrinsic to membrane, transmembrane signaling receptor activity, protein binding                                                                                                                                                                                                                                                                                                               |
| groupII | 124348   | 151348   | G2         | n    | ENSGACG00000013938 | FAM108C1          | hydrolase activity                                                                                                                                                                                                                                                                                                                                                                                                                           |
| groupII | 152317   | 191665   | G2         | bg   | ENSGACG00000013947 | ARNT2             | regulation of transcription, DNA-dependent, signal transduction, nucleus, signal transducer activity, protein binding, regulation of transcription, DNA-dependent, signal transduction, response to hypoxia, dopaminergic neuron differentiation, diencephalon development, hypothalamus cell differentiation, cell-cell adhesion, positive regulation of transcription, DNA-dependent, nucleus, signal transducer activity, protein binding |
| groupII | 208211   | 239211   | G2         | psL  | ENSGACG00000013959 | FAH               | metabolic process, aromatic amino acid family metabolic process, catalytic activity, fumarylacetoacetase activity                                                                                                                                                                                                                                                                                                                            |
| groupII | 208211   | 239211   | G2         | psL  | ENSGACG00000013974 | MTHFS             | folic acid-containing compound biosynthetic process, ATP binding, 5-formyltetrahydrofolate cyclo-ligase activity                                                                                                                                                                                                                                                                                                                             |
| groupII | 208211   | 239211   | G2         | psL  | ENSGACG00000013982 | ASB7              | intracellular signal transduction, protein binding                                                                                                                                                                                                                                                                                                                                                                                           |
| groupII | 777336   | 823336   | G2         | n    | -                  | -                 | -                                                                                                                                                                                                                                                                                                                                                                                                                                            |
| groupII | 6901119  | 7035403  | G2         | bg   | -                  | -                 | -                                                                                                                                                                                                                                                                                                                                                                                                                                            |
| groupII | 10838336 | 10855336 | G2         | psL  | ENSGACG00000015779 | ZFHX3             | regulation of transcription, DNA-dependent, metal ion transport, nucleus, intracellular, sequence-specific DNA binding transcription factor activity, nucleic acid binding, zinc ion binding, metal ion binding, sequence-specific DNA binding, protein binding                                                                                                                                                                              |
| groupII | 12627579 | 12659579 | G2         | n    | ENSGACG00000015990 | -                 | -                                                                                                                                                                                                                                                                                                                                                                                                                                            |
| groupII | 12661976 | 12694350 | G2         | psR  | ENSGACG00000015992 | -                 | -                                                                                                                                                                                                                                                                                                                                                                                                                                            |
| groupII | 13529008 | 13545449 | G2         | psR  | ENSGACG00000016129 | FAM120B           | DNA repair, nuclease activity                                                                                                                                                                                                                                                                                                                                                                                                                |
| groupII | 13577214 | 13591326 | G2         | psR  | ENSGACG00000016137 | MIS12             | cell cycle, mitosis, nucleus, chromosome, centromeric region                                                                                                                                                                                                                                                                                                                                                                                 |

|          |          |          |    |     |                    |                  |                                                                                                                                                                                                                                                              |
|----------|----------|----------|----|-----|--------------------|------------------|--------------------------------------------------------------------------------------------------------------------------------------------------------------------------------------------------------------------------------------------------------------|
| groupII  | 13577214 | 13591326 | G2 | psR | ENSGACG00000016139 | PPM1G            | protein dephosphorylation, protein serine/threonine phosphatase complex, catalytic activity, protein serine/threonine phosphatase activity                                                                                                                   |
| groupII  | 13607939 | 13656324 | G2 | n   | ENSGACG00000016144 | PDCD2            | cytoplasm, zinc ion binding                                                                                                                                                                                                                                  |
| groupII  | 13607939 | 13656324 | G2 | n   | ENSGACG00000016147 | TBP              | regulation of transcription, DNA-dependent, transcription initiation from RNA polymerase II promoter, gastrulation, mRNA catabolic process, transcription from RNA polymerase II promoter, DNA binding                                                       |
| groupII  | 13607939 | 13656324 | G2 | n   | ENSGACG00000016151 | PSMB1            | proteolysis involved in cellular protein catabolic process, proteasome core complex, endopeptidase activity, threonine-type endopeptidase activity                                                                                                           |
| groupII  | 13607939 | 13656324 | G2 | n   | ENSGACG00000016158 | PHF10            | zinc ion binding, protein binding                                                                                                                                                                                                                            |
| groupII  | 13607939 | 13656324 | G2 | n   | ENSGACG00000016166 | CCSAP (1 of 2)   | -                                                                                                                                                                                                                                                            |
| groupII  | 13607939 | 13656324 | G2 | n   | ENSGACG00000016168 | ACTC1 (3 of 3)   | ATP binding                                                                                                                                                                                                                                                  |
| groupII  | 13607939 | 13656324 | G2 | n   | ENSGACG00000016174 | -                | -                                                                                                                                                                                                                                                            |
| groupII  | 13607939 | 13656324 | G2 | n   | ENSGACG00000016176 | ABCB10           | transport, transmembrane transport, integral to membrane, ATP binding, nucleotide binding, ATPase activity, ATPase activity, coupled to transmembrane movement of substances, nucleoside-triphosphatase activity                                             |
| groupII  | 13607939 | 13656324 | G2 | n   | ENSGACG00000016150 | PSMC3            | protein catabolic process, cytoplasm, ATP binding, hydrolase activity, nucleotide binding, nucleoside-triphosphatase activity, protein catabolic process, cytoplasm, ATP binding, hydrolase activity, nucleotide binding, nucleoside-triphosphatase activity |
| groupII  | 13607939 | 13656324 | G2 | n   | ENSGACG00000016164 | RAB4A            | signal transduction, GTP catabolic process, small GTPase mediated signal transduction, intracellular protein transport, nucleocytoplasmic transport, protein transport, intracellular, GTPase activity, GTP binding                                          |
| groupII  | 14299098 | 14317098 | G2 | n   | -                  | -                | -                                                                                                                                                                                                                                                            |
| groupIII | 5103212  | 5145627  | G2 | psR | ENSGACG00000014579 | -                | G-protein coupled receptor signaling pathway, integral to membrane                                                                                                                                                                                           |
| groupIII | 5103212  | 5145627  | G2 | psR | ENSGACG00000014581 | CNT-P2-(2-of-2)  | cell adhesion, calcium ion binding, protein binding                                                                                                                                                                                                          |
| groupIII | 5103212  | 5145627  | G2 | psR | ENSGACG00000014583 | TMEM70           | -                                                                                                                                                                                                                                                            |
| groupIII | 8517725  | 8559943  | G2 | psR | ENSGACG00000015576 | KCNN1 (1 of 2)   | potassium ion transport, integral to membrane, calcium-activated potassium channel activity, calmodulin binding                                                                                                                                              |
| groupIII | 8815498  | 8872573  | G2 | psL | ENSGACG00000015666 | FAM69A (2 of 2)  | -                                                                                                                                                                                                                                                            |
| groupIII | 8815498  | 8872573  | G2 | psL | ENSGACG00000015670 | RPL5 (1 of 3)    | translation, intracellular, ribosome, structural constituent of ribosome                                                                                                                                                                                     |
| groupIII | 8815498  | 8872573  | G2 | psL | ENSGACG00000022640 | -                | -                                                                                                                                                                                                                                                            |
| groupIII | 8815498  | 8872573  | G2 | psL | ENSGACG00000022680 | -                | -                                                                                                                                                                                                                                                            |
| groupIII | 8815498  | 8872573  | G2 | psL | ENSGACG00000022637 | -                | -                                                                                                                                                                                                                                                            |
| groupIII | 8815498  | 8872573  | G2 | psL | ENSGACG00000015672 | -                | -                                                                                                                                                                                                                                                            |
| groupIII | 8815498  | 8872573  | G2 | psL | ENSGACG00000015674 | -                | intracellular, DNA binding, zinc ion binding, intracellular, DNA binding, zinc ion binding                                                                                                                                                                   |
| groupIII | 8815498  | 8872573  | G2 | psL | ENSGACG00000015678 | RPAP2            | -                                                                                                                                                                                                                                                            |
| groupIII | 8815498  | 8872573  | G2 | psL | ENSGACG00000015634 | -                | actin binding                                                                                                                                                                                                                                                |
| groupIII | 8815498  | 8872573  | G2 | psL | ENSGACG00000015662 | CCDC18           | -                                                                                                                                                                                                                                                            |
| groupIII | 8815498  | 8872573  | G2 | psL | ENSGACG00000015665 | MTF2             | nucleic acid binding, DNA binding, zinc ion binding, protein binding                                                                                                                                                                                         |
| groupIII | 8922068  | 8940068  | G2 | psL | ENSGACG00000015695 | LRRC8D (2 of 2)  | protein binding                                                                                                                                                                                                                                              |
| groupIII | 8922068  | 8940068  | G2 | psL | ENSGACG00000015696 | GTF2B            | regulation of transcription, DNA-dependent, translational initiation, zinc ion binding, translation initiation factor activity                                                                                                                               |
| groupIII | 8922068  | 8940068  | G2 | psL | ENSGACG00000015702 | -                | signal transduction, protein phosphorylation, intracellular, ATP binding, protein kinase activity, protein binding, transferase activity, transferring phosphorus-containing groups, protein serine/threonine kinase activity                                |
| groupIII | 9413821  | 9445821  | G2 | bg  | ENSGACG00000016113 | B3GALT2 (2 of 2) | protein glycosylation, membrane, galactosyltransferase activity                                                                                                                                                                                              |
| groupIII | 9413821  | 9445821  | G2 | bg  | ENSGACG00000016114 | CDC73 (1 of 2)   | -                                                                                                                                                                                                                                                            |
| groupIII | 9413821  | 9445821  | G2 | bg  | ENSGACG00000016121 | RGS21            | signal transducer activity                                                                                                                                                                                                                                   |
| groupIII | 9413821  | 9445821  | G2 | bg  | ENSGACG00000016122 | RGS18            | signal transducer activity                                                                                                                                                                                                                                   |
| groupIII | 9413821  | 9445821  | G2 | bg  | ENSGACG00000016106 | CDC73 (2 of 2)   | -                                                                                                                                                                                                                                                            |
| groupIII | 9413821  | 9445821  | G2 | bg  | ENSGACG00000016116 | -                | signal transducer activity                                                                                                                                                                                                                                   |
| groupIII | 11094714 | 11126112 | G2 | n   | ENSGACG00000016640 | SOGA2            | -                                                                                                                                                                                                                                                            |
| groupIII | 11272658 | 11327703 | G2 | psL | ENSGACG00000016675 | -                | -                                                                                                                                                                                                                                                            |
| groupIII | 11272658 | 11327703 | G2 | psL | ENSGACG00000016674 | EPB41L3          | cortical actin cytoskeleton organization, cytoskeleton, actin binding, structural molecule activity, cytoskeletal protein binding                                                                                                                            |
| groupIII | 11272658 | 11327703 | G2 | psL | ENSGACG00000016677 | -                | protein dephosphorylation, dephosphorylation, membrane, protein tyrosine phosphatase activity, phosphatase activity, protein binding                                                                                                                         |
| groupIII | 12058014 | 12070014 | G2 | psR | ENSGACG00000016820 | -                | protein dephosphorylation, dephosphorylation, protein tyrosine phosphatase activity, phosphatase activity, protein binding                                                                                                                                   |

|          |          |          |    |     |                    |                  |                                                                                                                                                                                                                                                                                                                                                                                                                                                                                                                                                                                                                        |
|----------|----------|----------|----|-----|--------------------|------------------|------------------------------------------------------------------------------------------------------------------------------------------------------------------------------------------------------------------------------------------------------------------------------------------------------------------------------------------------------------------------------------------------------------------------------------------------------------------------------------------------------------------------------------------------------------------------------------------------------------------------|
| groupIII | 12235740 | 12250742 | G2 | psL | ENSGACG00000016890 | -                | intracellular, zinc ion binding                                                                                                                                                                                                                                                                                                                                                                                                                                                                                                                                                                                        |
| groupIII | 12235740 | 12250742 | G2 | psL | ENSGACG00000016893 | EPS15L1 (2 of 2) | signal transduction, intracellular, calcium ion binding, protein binding                                                                                                                                                                                                                                                                                                                                                                                                                                                                                                                                               |
| groupIV  | 7072653  | 7108653  | G2 | psR | -                  | -                | -                                                                                                                                                                                                                                                                                                                                                                                                                                                                                                                                                                                                                      |
| groupIV  | 11318370 | 11348795 | G2 | psR | ENSGACG00000018081 | -                | -                                                                                                                                                                                                                                                                                                                                                                                                                                                                                                                                                                                                                      |
| groupIV  | 11869871 | 11885871 | G2 | psR | ENSGACG00000018209 | NR3C1 (1 of 2)   | regulation of transcription, DNA-dependent, steroid hormone mediated signaling pathway, glucocorticoid receptor signaling pathway, glucocorticoid mediated signaling pathway, response to dexamethasone stimulus, response to cortisol stimulus, response to glucocorticoid stimulus, calcium ion import, embryo development, positive regulation of transcription, DNA-dependent, nucleus, cytoplasm, sequence-specific DNA binding transcription factor activity, steroid hormone receptor activity, DNA binding, zinc ion binding, steroid binding, sequence-specific DNA binding, glucocorticoid receptor activity |
| groupIV  | 14478349 | 14529546 | G2 | psL | ENSGACG00000018483 | -                | proteolysis, protein ubiquitination, ubiquitin ligase complex, zinc ion binding, protein binding, ATP-dependent peptidase activity, ubiquitin-protein ligase activity                                                                                                                                                                                                                                                                                                                                                                                                                                                  |
| groupIV  | 14478349 | 14529546 | G2 | psL | ENSGACG00000018485 | ITK              | intracellular signal transduction, protein phosphorylation, ATP binding, protein kinase activity, protein binding, transferase activity, transferring phosphorus-containing groups, protein serine/threonine kinase activity, protein tyrosine kinase activity                                                                                                                                                                                                                                                                                                                                                         |
| groupIV  | 14478349 | 14529546 | G2 | psL | ENSGACG00000018480 | GRIA1 (2 of 2)   | transport, membrane, outer membrane-bounded periplasmic space, transporter activity, ionotropic glutamate receptor activity, extracellular-glutamate-gated ion channel activity, transport, membrane, outer membrane-bounded periplasmic space, transporter activity, ionotropic glutamate receptor activity, extracellular-glutamate-gated ion channel activity                                                                                                                                                                                                                                                       |
| groupIV  | 14478349 | 14529546 | G2 | psL | ENSGACG00000018484 | MED7             | regulation of transcription from RNA polymerase II promoter, mediator complex                                                                                                                                                                                                                                                                                                                                                                                                                                                                                                                                          |
| groupIV  | 14606821 | 14680160 | G2 | bg  | -                  | -                | -                                                                                                                                                                                                                                                                                                                                                                                                                                                                                                                                                                                                                      |
| groupIV  | 14776106 | 14835414 | G2 | psR | -                  | -                | -                                                                                                                                                                                                                                                                                                                                                                                                                                                                                                                                                                                                                      |
| groupIV  | 16428671 | 16454671 | G2 | n   | ENSGACG00000018710 | GABRA4           | transport, ion transport, membrane, integral to membrane, postsynaptic membrane, extracellular ligand-gated ion channel activity                                                                                                                                                                                                                                                                                                                                                                                                                                                                                       |
| groupIV  | 21481867 | 21549867 | G2 | n   | ENSGACG00000019079 | -                | -                                                                                                                                                                                                                                                                                                                                                                                                                                                                                                                                                                                                                      |
| groupIV  | 21481867 | 21549867 | G2 | n   | ENSGACG00000019082 | LRMP             | -                                                                                                                                                                                                                                                                                                                                                                                                                                                                                                                                                                                                                      |
| groupIV  | 21481867 | 21549867 | G2 | n   | ENSGACG00000019084 | CASC1 (1 of 2)   | -                                                                                                                                                                                                                                                                                                                                                                                                                                                                                                                                                                                                                      |
| groupIV  | 21481867 | 21549867 | G2 | n   | ENSGACG00000019086 | LYRM5            | -                                                                                                                                                                                                                                                                                                                                                                                                                                                                                                                                                                                                                      |
| groupIV  | 21481867 | 21549867 | G2 | n   | ENSGACG00000019087 | SLC5A8           | transport, transmembrane transport, membrane, transporter activity                                                                                                                                                                                                                                                                                                                                                                                                                                                                                                                                                     |
| groupIV  | 21481867 | 21549867 | G2 | n   | ENSGACG00000019080 | -                | -                                                                                                                                                                                                                                                                                                                                                                                                                                                                                                                                                                                                                      |
| groupIV  | 21481867 | 21549867 | G2 | n   | ENSGACG00000019092 | UTP20            | -                                                                                                                                                                                                                                                                                                                                                                                                                                                                                                                                                                                                                      |
| groupIV  | 21481867 | 21549867 | G2 | n   | ENSGACG00000019077 | BCAT1            | metabolic process, catalytic activity                                                                                                                                                                                                                                                                                                                                                                                                                                                                                                                                                                                  |
| groupIV  | 21712176 | 21759548 | G2 | n   | ENSGACG00000019120 | FAM19A2          | -                                                                                                                                                                                                                                                                                                                                                                                                                                                                                                                                                                                                                      |
| groupIV  | 22473325 | 22603535 | G2 | n   | ENSGACG00000019202 | C1orf31          | mitochondrion, cytochrome-c oxidase activity, mitochondrion, cytochrome-c oxidase activity                                                                                                                                                                                                                                                                                                                                                                                                                                                                                                                             |
| groupIV  | 22473325 | 22603535 | G2 | n   | ENSGACG00000019206 | -                | -                                                                                                                                                                                                                                                                                                                                                                                                                                                                                                                                                                                                                      |
| groupIV  | 22473325 | 22603535 | G2 | n   | ENSGACG00000019208 | ARNTL2           | regulation of transcription, DNA-dependent, signal transduction, photoperiodism, response to light stimulus, circadian rhythm, nucleus, signal transducer activity, protein binding                                                                                                                                                                                                                                                                                                                                                                                                                                    |
| groupIV  | 22473325 | 22603535 | G2 | n   | ENSGACG00000019215 | SIL1             | binding, binding                                                                                                                                                                                                                                                                                                                                                                                                                                                                                                                                                                                                       |
| groupIV  | 22473325 | 22603535 | G2 | n   | ENSGACG00000019193 | PTPRZ1 (2 of 2)  | protein dephosphorylation, dephosphorylation, protein tyrosine phosphatase activity, phosphatase activity, protein binding                                                                                                                                                                                                                                                                                                                                                                                                                                                                                             |
| groupIV  | 22473325 | 22603535 | G2 | n   | ENSGACG00000019204 | SLC13A4          | sodium ion transport, transmembrane transport, membrane, transporter activity                                                                                                                                                                                                                                                                                                                                                                                                                                                                                                                                          |
| groupIV  | 22473325 | 22603535 | G2 | n   | ENSGACG00000019212 | TRAPPC11         | retina development in camera-type eye                                                                                                                                                                                                                                                                                                                                                                                                                                                                                                                                                                                  |
| groupIV  | 22473325 | 22603535 | G2 | n   | ENSGACG00000019214 | CCDC99           | -                                                                                                                                                                                                                                                                                                                                                                                                                                                                                                                                                                                                                      |
| groupIV  | 22958919 | 23020919 | G2 | n   | ENSGACG00000019233 | -                | positive regulation of Wnt receptor signaling pathway, positive regulation of Wnt receptor signaling pathway involved in dorsal/ventral axis specification, positive regulation of canonical Wnt receptor signaling pathway, dorsal/ventral pattern formation, protein binding                                                                                                                                                                                                                                                                                                                                         |
| groupIV  | 22958919 | 23020919 | G2 | n   | ENSGACG00000019236 | IPO8             | intracellular protein transport, binding, protein transporter activity                                                                                                                                                                                                                                                                                                                                                                                                                                                                                                                                                 |
| groupIV  | 22958919 | 23020919 | G2 | n   | ENSGACG00000019230 | -                | -                                                                                                                                                                                                                                                                                                                                                                                                                                                                                                                                                                                                                      |
| groupIV  | 23139373 | 23280181 | G2 | -   | ENSGACG00000019247 | GPR22 (2 of 2)   | G-protein coupled receptor signaling pathway, integral to membrane, ATP binding                                                                                                                                                                                                                                                                                                                                                                                                                                                                                                                                        |
| groupIV  | 23139373 | 23280181 | G2 | -   | ENSGACG00000019249 | AEBP2 (2 of 2)   | intracellular, zinc ion binding                                                                                                                                                                                                                                                                                                                                                                                                                                                                                                                                                                                        |
| groupIV  | 23139373 | 23280181 | G2 | -   | ENSGACG00000019242 | COG5             | -                                                                                                                                                                                                                                                                                                                                                                                                                                                                                                                                                                                                                      |
| groupIV  | 23139373 | 23280181 | G2 | -   | ENSGACG00000019248 | NDUFA5           | respiratory electron transport chain, mitochondrial inner membrane, oxidoreductase activity, acting on NADH or NADPH                                                                                                                                                                                                                                                                                                                                                                                                                                                                                                   |
| groupIV  | 23139373 | 23280181 | G2 | -   | ENSGACG00000019253 | PLEKHA5 (2 of 2) | protein binding                                                                                                                                                                                                                                                                                                                                                                                                                                                                                                                                                                                                        |

|         |          |          |    |     |                    |                 |                                                                                                                                                                                                                                                                                                                                                                                                                                                                                                                                              |
|---------|----------|----------|----|-----|--------------------|-----------------|----------------------------------------------------------------------------------------------------------------------------------------------------------------------------------------------------------------------------------------------------------------------------------------------------------------------------------------------------------------------------------------------------------------------------------------------------------------------------------------------------------------------------------------------|
| groupIV | 23292642 | 23429982 | G2 | n   | ENSGACG00000019257 | BRAF            | signal transduction, intracellular signal transduction, protein phosphorylation, ATP binding, protein kinase activity, transferase activity, transferring phosphorus-containing groups, protein serine/threonine kinase activity, receptor signaling protein activity, signal transduction, intracellular signal transduction, protein phosphorylation, ATP binding, protein kinase activity, transferase activity, transferring phosphorus-containing groups, protein serine/threonine kinase activity, receptor signaling protein activity |
| groupIV | 23292642 | 23429982 | G2 | n   | ENSGACG00000019259 | C9orf100        | regulation of Rho protein signal transduction, intracellular, protein binding, Rho guanyl-nucleotide exchange factor activity                                                                                                                                                                                                                                                                                                                                                                                                                |
| groupIV | 23581475 | 23713478 | G2 | psR | ENSGACG00000019267 | MGST1           | -                                                                                                                                                                                                                                                                                                                                                                                                                                                                                                                                            |
| groupIV | 23581475 | 23713478 | G2 | psR | ENSGACG00000019269 | DERA            | deoxyribonucleotide catabolic process, cytoplasm, lyase activity, deoxyribose-phosphate aldolase activity                                                                                                                                                                                                                                                                                                                                                                                                                                    |
| groupIV | 23581475 | 23713478 | G2 | psR | ENSGACG00000019264 | LMO3            | zinc ion binding                                                                                                                                                                                                                                                                                                                                                                                                                                                                                                                             |
| groupIV | 24970842 | 24986216 | G2 | psR | ENSGACG00000019459 | NAP1L1          | nucleosome assembly, nucleus                                                                                                                                                                                                                                                                                                                                                                                                                                                                                                                 |
| groupIV | 25333833 | 25361833 | G2 | psR | ENSGACG00000019472 | NAV3            | protein binding                                                                                                                                                                                                                                                                                                                                                                                                                                                                                                                              |
| groupIV | 26458518 | 26484028 | G2 | psR | ENSGACG00000019609 | SLC7A11         | transport, transmembrane transport, metal ion transport, membrane, metal ion binding                                                                                                                                                                                                                                                                                                                                                                                                                                                         |
| groupIV | 29218514 | 29258520 | G2 | psR | ENSGACG00000019718 | PLXNA4          | signal transduction, axonal defasciculation, morphogenesis of a branching structure, axon guidance, membrane, intracellular, catalytic activity, protein binding                                                                                                                                                                                                                                                                                                                                                                             |
| groupIV | 31072967 | 31081967 | G2 | psR | -                  | -               | -                                                                                                                                                                                                                                                                                                                                                                                                                                                                                                                                            |
| groupIX | 4547838  | 4562838  | G2 | n   | ENSGACG00000016566 | TRIP10 (2 of 2) | signal transduction, intracellular, protein binding                                                                                                                                                                                                                                                                                                                                                                                                                                                                                          |
| groupIX | 4547838  | 4562838  | G2 | n   | ENSGACG00000016568 | SH2D3A          | small GTPase mediated signal transduction, intracellular, protein binding, guanyl-nucleotide exchange factor activity                                                                                                                                                                                                                                                                                                                                                                                                                        |
| groupIX | 8439431  | 8479686  | G2 | psR | ENSGACG00000017608 | MOGS            | oligosaccharide metabolic process, catalytic activity, mannosyl-oligosaccharide glucosidase activity                                                                                                                                                                                                                                                                                                                                                                                                                                         |
| groupIX | 8439431  | 8479686  | G2 | psR | ENSGACG00000017610 | -               | -                                                                                                                                                                                                                                                                                                                                                                                                                                                                                                                                            |
| groupIX | 8439431  | 8479686  | G2 | psR | ENSGACG00000017612 | EGR4            | intracellular, DNA binding, zinc ion binding                                                                                                                                                                                                                                                                                                                                                                                                                                                                                                 |
| groupIX | 8439431  | 8479686  | G2 | psR | ENSGACG00000017601 | -               | -                                                                                                                                                                                                                                                                                                                                                                                                                                                                                                                                            |
| groupIX | 8550530  | 8581532  | G2 | psR | ENSGACG00000017636 | CLDND1 (1 of 2) | -                                                                                                                                                                                                                                                                                                                                                                                                                                                                                                                                            |
| groupIX | 8550530  | 8581532  | G2 | psR | ENSGACG00000017646 | ACY3            | metabolic process, hydrolase activity, acting on ester bonds                                                                                                                                                                                                                                                                                                                                                                                                                                                                                 |
| groupIX | 8550530  | 8581532  | G2 | psR | ENSGACG00000017657 | -               | protein ADP-ribosylation, NAD(P)+-protein-arginine ADP-ribosyltransferase activity                                                                                                                                                                                                                                                                                                                                                                                                                                                           |
| groupIX | 8550530  | 8581532  | G2 | psR | ENSGACG00000017658 | CCDC111         | -                                                                                                                                                                                                                                                                                                                                                                                                                                                                                                                                            |
| groupIX | 8550530  | 8581532  | G2 | psR | ENSGACG00000017633 | GLB1            | carbohydrate metabolic process, beta-galactosidase complex, hydrolase activity, hydrolyzing O-glycosyl compounds, beta-galactosidase activity                                                                                                                                                                                                                                                                                                                                                                                                |
| groupIX | 8550530  | 8581532  | G2 | psR | ENSGACG00000017653 | TACR3 (1 of 2)  | G-protein coupled receptor signaling pathway, integral to membrane                                                                                                                                                                                                                                                                                                                                                                                                                                                                           |
| groupIX | 8760343  | 8774343  | G2 | n   | ENSGACG00000017860 | ACER2           | ceramide metabolic process, integral to membrane, hydrolase activity, acting on carbon-nitrogen (but not peptide) bonds, in linear amides                                                                                                                                                                                                                                                                                                                                                                                                    |
| groupIX | 8760343  | 8774343  | G2 | n   | ENSGACG00000017858 | TSPAN5 (1 of 2) | mitochondrial electron transport, cytochrome c to oxygen, membrane, integral to membrane, cytochrome-c oxidase activity                                                                                                                                                                                                                                                                                                                                                                                                                      |
| groupIX | 9242584  | 9343815  | G2 | bg  | ENSGACG00000017985 | CTNNA2          | cell adhesion, actin cytoskeleton, structural molecule activity                                                                                                                                                                                                                                                                                                                                                                                                                                                                              |
| groupIX | 9508292  | 9539512  | G2 | psL | ENSGACG00000018013 | PRSS12          | proteolysis, membrane, catalytic activity, serine-type endopeptidase activity, scavenger receptor activity, proteolysis, membrane, catalytic activity, serine-type endopeptidase activity, scavenger receptor activity                                                                                                                                                                                                                                                                                                                       |
| groupIX | 9508292  | 9539512  | G2 | psL | ENSGACG00000018022 | NDST4           | DNA recombination, double-strand break repair via homologous recombination, regulation of S phase of mitotic cell cycle, nucleus, single-stranded DNA binding, sulfotransferase activity                                                                                                                                                                                                                                                                                                                                                     |
| groupIX | 9798894  | 9869988  | G2 | psL | ENSGACG00000018054 | SERPING1        | protein binding                                                                                                                                                                                                                                                                                                                                                                                                                                                                                                                              |
| groupIX | 9798894  | 9869988  | G2 | psL | ENSGACG00000018056 | TMEM134         | -                                                                                                                                                                                                                                                                                                                                                                                                                                                                                                                                            |
| groupIX | 9798894  | 9869988  | G2 | psL | ENSGACG00000018060 | AIP             | protein folding, protein binding                                                                                                                                                                                                                                                                                                                                                                                                                                                                                                             |
| groupIX | 9798894  | 9869988  | G2 | psL | ENSGACG00000018065 | CDK2AP2         | -                                                                                                                                                                                                                                                                                                                                                                                                                                                                                                                                            |
| groupIX | 9798894  | 9869988  | G2 | psL | ENSGACG00000018070 | ANKRD49         | protein binding                                                                                                                                                                                                                                                                                                                                                                                                                                                                                                                              |
| groupIX | 9798894  | 9869988  | G2 | psL | ENSGACG00000018071 | GRIA2 (2 of 2)  | transport, membrane, outer membrane-bounded periplasmic space, transporter activity, ionotropic glutamate receptor activity, extracellular-glutamate-gated ion channel activity                                                                                                                                                                                                                                                                                                                                                              |
| groupIX | 9798894  | 9869988  | G2 | psL | ENSGACG00000018066 | GPR83           | G-protein coupled receptor signaling pathway, integral to membrane                                                                                                                                                                                                                                                                                                                                                                                                                                                                           |
| groupIX | 9872142  | 9945914  | G2 | psL | ENSGACG00000018088 | -               | intracellular, DNA binding, zinc ion binding                                                                                                                                                                                                                                                                                                                                                                                                                                                                                                 |
| groupIX | 9872142  | 9945914  | G2 | psL | ENSGACG00000018071 | GRIA2 (2 of 2)  | transport, membrane, outer membrane-bounded periplasmic space, transporter activity, ionotropic glutamate receptor activity, extracellular-glutamate-gated ion channel activity                                                                                                                                                                                                                                                                                                                                                              |
| groupIX | 9872142  | 9945914  | G2 | psL | ENSGACG00000018090 | EEF1A1          | translational elongation, cytoplasm, GTPase activity, GTP binding, translation elongation factor activity                                                                                                                                                                                                                                                                                                                                                                                                                                    |
| groupIX | 9872142  | 9945914  | G2 | psL | ENSGACG00000018097 | KCNQ5 (1 of 2)  | ion transport, transmembrane transport, membrane, ion channel activity                                                                                                                                                                                                                                                                                                                                                                                                                                                                       |

|         |          |          |    |     |                    |                   |                                                                                                                                                                                                                                                                                                                                                                                |
|---------|----------|----------|----|-----|--------------------|-------------------|--------------------------------------------------------------------------------------------------------------------------------------------------------------------------------------------------------------------------------------------------------------------------------------------------------------------------------------------------------------------------------|
| groupIX | 10015553 | 10081814 | G2 | psR | ENSGACG00000018108 | -                 | -                                                                                                                                                                                                                                                                                                                                                                              |
| groupIX | 10015553 | 10081814 | G2 | psR | ENSGACG00000018110 | KRT222            | -                                                                                                                                                                                                                                                                                                                                                                              |
| groupIX | 10015553 | 10081814 | G2 | psR | ENSGACG00000018111 | TNS4              | protein binding                                                                                                                                                                                                                                                                                                                                                                |
| groupIX | 10015553 | 10081814 | G2 | psR | ENSGACG00000018112 | CCR7              | G-protein coupled receptor signaling pathway, integral to membrane                                                                                                                                                                                                                                                                                                             |
| groupIX | 10015553 | 10081814 | G2 | psR | ENSGACG00000018104 | RIMS1 (2 of 2)    | transcription, DNA-dependent, intracellular protein transport, DNA binding, zinc ion binding, ATP binding, protein binding, DNA-directed RNA polymerase activity, Rab GTPase binding, protein binding, transcription, DNA-dependent, intracellular protein transport, DNA binding, zinc ion binding, protein binding, DNA-directed RNA polymerase activity, Rab GTPase binding |
| groupIX | 10015553 | 10081814 | G2 | psR | ENSGACG00000018109 | -                 | -                                                                                                                                                                                                                                                                                                                                                                              |
| groupIX | 10015553 | 10081814 | G2 | psR | ENSGACG00000018114 | SMARCE1 (1 of 2)  | DNA binding, protein binding                                                                                                                                                                                                                                                                                                                                                   |
| groupIX | 10015553 | 10081814 | G2 | psR | ENSGACG00000018120 | IGFBP4            | regulation of cell growth, extracellular region, insulin-like growth factor binding                                                                                                                                                                                                                                                                                            |
| groupIX | 10168106 | 10238394 | G2 | psR | ENSGACG00000018158 | -                 | -                                                                                                                                                                                                                                                                                                                                                                              |
| groupIX | 10168106 | 10238394 | G2 | psR | ENSGACG00000018165 | QPRT              | NAD biosynthetic process, pyridine nucleotide biosynthetic process, nicotinate-nucleotide diphosphorylase (carboxylating) activity, transferase activity, transferring pentosyl groups, NAD biosynthetic process, pyridine nucleotide biosynthetic process, nicotinate-nucleotide diphosphorylase (carboxylating) activity, transferase activity, transferring pentosyl groups |
| groupIX | 10168106 | 10238394 | G2 | psR | ENSGACG00000018168 | PPP1R12C          | protein binding                                                                                                                                                                                                                                                                                                                                                                |
| groupIX | 10168106 | 10238394 | G2 | psR | ENSGACG00000018170 | ARHGDI1 (2 of 2)  | cytoplasm, Rho GDP-dissociation inhibitor activity                                                                                                                                                                                                                                                                                                                             |
| groupIX | 10168106 | 10238394 | G2 | psR | ENSGACG00000018178 | ALYREF (2 of 2)   | nucleic acid binding                                                                                                                                                                                                                                                                                                                                                           |
| groupIX | 10168106 | 10238394 | G2 | psR | ENSGACG00000018183 | ANAPC11           | zinc ion binding, protein binding                                                                                                                                                                                                                                                                                                                                              |
| groupIX | 10168106 | 10238394 | G2 | psR | ENSGACG00000018184 | -                 | protein binding                                                                                                                                                                                                                                                                                                                                                                |
| groupIX | 10168106 | 10238394 | G2 | psR | ENSGACG00000018185 | P4HB              | cell redox homeostasis, endoplasmic reticulum, isomerase activity                                                                                                                                                                                                                                                                                                              |
| groupIX | 10168106 | 10238394 | G2 | psR | ENSGACG00000018160 | PLA2G12B (1 of 2) | lipid catabolic process, extracellular region, calcium ion binding, phospholipase A2 activity                                                                                                                                                                                                                                                                                  |
| groupIX | 10168106 | 10238394 | G2 | psR | ENSGACG00000018163 | ITGAL             | protein binding                                                                                                                                                                                                                                                                                                                                                                |
| groupIX | 10329724 | 10371179 | G2 | n   | ENSGACG00000018193 | RPTOR             | binding, protein binding                                                                                                                                                                                                                                                                                                                                                       |
| groupIX | 11850949 | 11931949 | G2 | psR | ENSGACG00000018410 | PCDH18 (1 of 2)   | cell adhesion, homophilic cell adhesion, epiboly involved in gastrulation with mouth forming second, calcium-dependent cell-cell adhesion, cell migration involved in gastrulation, membrane, plasma membrane, calcium ion binding                                                                                                                                             |
| groupIX | 13305317 | 13323317 | G2 | psR | ENSGACG00000018581 | SGCZ (1 of 2)     | cytoskeleton organization, integral to membrane, sarcoglycan complex                                                                                                                                                                                                                                                                                                           |
| groupIX | 14387342 | 14405386 | G2 | psR | ENSGACG00000018766 | SRL (2 of 2)      | -                                                                                                                                                                                                                                                                                                                                                                              |
| groupIX | 14387342 | 14405386 | G2 | psR | ENSGACG00000018768 | TFAP4 (2 of 2)    | regulation of transcription, DNA-dependent, nucleus                                                                                                                                                                                                                                                                                                                            |
| groupIX | 14516765 | 14540335 | G2 | -   | ENSGACG00000018792 | TMED1 (1 of 2)    | transport, integral to membrane                                                                                                                                                                                                                                                                                                                                                |
| groupIX | 14516765 | 14540335 | G2 | -   | ENSGACG00000018797 | DNM2 (1 of 2)     | GTPase activity, GTP binding, protein binding, IMP cyclohydrolase activity                                                                                                                                                                                                                                                                                                     |
| groupIX | 14560561 | 14611719 | G2 | n   | ENSGACG00000018810 | TECR (1 of 2)     | lipid metabolic process, integral to membrane, cytoplasm, oxidoreductase activity, acting on the CH-CH group of donors                                                                                                                                                                                                                                                         |
| groupIX | 14560561 | 14611719 | G2 | n   | ENSGACG00000018831 | NDUFB7            | mitochondrion, NADH dehydrogenase (ubiquinone) activity, NADH dehydrogenase activity                                                                                                                                                                                                                                                                                           |
| groupIX | 14560561 | 14611719 | G2 | n   | ENSGACG00000018834 | SAMD1 (2 of 2)    | nucleus, sequence-specific DNA binding, protein binding                                                                                                                                                                                                                                                                                                                        |
| groupIX | 14560561 | 14611719 | G2 | n   | ENSGACG00000018839 | ASF1B (1 of 2)    | regulation of transcription, DNA-dependent, chromatin assembly or disassembly, nucleus, sequence-specific DNA binding transcription factor activity                                                                                                                                                                                                                            |
| groupIX | 14560561 | 14611719 | G2 | n   | ENSGACG00000018800 | D-JB1-(1-of-2)    | protein folding, unfolded protein binding, heat shock protein binding                                                                                                                                                                                                                                                                                                          |
| groupIX | 14560561 | 14611719 | G2 | n   | ENSGACG00000018832 | -                 | ATP binding, hydrolase activity, binding, nucleotide binding, ATPase activity, nucleoside-triphosphatase activity                                                                                                                                                                                                                                                              |
| groupIX | 14560561 | 14611719 | G2 | n   | ENSGACG00000018837 | -                 | protein phosphorylation, ATP binding, protein kinase activity, transferase activity, transferring phosphorus-containing groups, protein serine/threonine kinase activity                                                                                                                                                                                                       |
| groupIX | 15060706 | 15238842 | G2 | n   | ENSGACG00000018987 | RFX1 (2 of 2)     | regulation of transcription, DNA-dependent, nucleus, DNA binding                                                                                                                                                                                                                                                                                                               |
| groupIX | 15060706 | 15238842 | G2 | n   | ENSGACG00000018989 | DCAF15            | -                                                                                                                                                                                                                                                                                                                                                                              |
| groupIX | 15060706 | 15238842 | G2 | n   | ENSGACG00000018992 | SLC25A41          | calcium ion binding, protein binding, calcium ion binding, protein binding                                                                                                                                                                                                                                                                                                     |
| groupIX | 15060706 | 15238842 | G2 | n   | ENSGACG00000018994 | C19orf53          | -                                                                                                                                                                                                                                                                                                                                                                              |
| groupIX | 15060706 | 15238842 | G2 | n   | ENSGACG00000018995 | MRI1              | cellular metabolic process, cellular biosynthetic process                                                                                                                                                                                                                                                                                                                      |
| groupIX | 15060706 | 15238842 | G2 | n   | ENSGACG00000019002 | -                 | -                                                                                                                                                                                                                                                                                                                                                                              |
| groupIX | 15060706 | 15238842 | G2 | n   | ENSGACG00000019003 | NANOS3            | female gamete generation, oocyte growth, nucleic acid binding, zinc ion binding, RNA binding                                                                                                                                                                                                                                                                                   |
| groupIX | 15060706 | 15238842 | G2 | n   | ENSGACG00000019006 | SLC26A11          | transport, transmembrane transport, sulfate transport, membrane, integral to membrane, transporter activity, secondary active sulfate transmembrane transporter activity                                                                                                                                                                                                       |

|           |          |          |    |     |                    |                 |                                                                                                                                                                                                                                                                                                                                      |
|-----------|----------|----------|----|-----|--------------------|-----------------|--------------------------------------------------------------------------------------------------------------------------------------------------------------------------------------------------------------------------------------------------------------------------------------------------------------------------------------|
| groupIX   | 15060706 | 15238842 | G2 | n   | ENSGACG00000019013 | NPB (1 of 2)    | -                                                                                                                                                                                                                                                                                                                                    |
| groupIX   | 15060706 | 15238842 | G2 | n   | ENSGACG00000019035 | SIRT7           | regulation of transcription, DNA-dependent, chromatin silencing, protein deacetylation, zinc ion binding, hydrolase activity, acting on carbon-nitrogen (but not peptide) bonds, in linear amides, NAD+ binding                                                                                                                      |
| groupIX   | 15060706 | 15238842 | G2 | n   | ENSGACG00000019039 | -               | -                                                                                                                                                                                                                                                                                                                                    |
| groupIX   | 15060706 | 15238842 | G2 | n   | ENSGACG00000019041 | MAFG            | -                                                                                                                                                                                                                                                                                                                                    |
| groupIX   | 15060706 | 15238842 | G2 | n   | ENSGACG00000018993 | -               | signal transducer activity                                                                                                                                                                                                                                                                                                           |
| groupIX   | 15060706 | 15238842 | G2 | n   | ENSGACG00000018999 | CC2D1A          | protein binding                                                                                                                                                                                                                                                                                                                      |
| groupIX   | 15060706 | 15238842 | G2 | n   | ENSGACG00000019004 | -               | membrane, scavenger receptor activity                                                                                                                                                                                                                                                                                                |
| groupIX   | 15060706 | 15238842 | G2 | n   | ENSGACG00000019010 | SGSH            | metabolic process, catalytic activity, sulfuric ester hydrolase activity                                                                                                                                                                                                                                                             |
| groupIX   | 15060706 | 15238842 | G2 | n   | ENSGACG00000019015 | -               | signal transduction, G-protein coupled receptor signaling pathway, signal transducer activity, guanyl nucleotide binding                                                                                                                                                                                                             |
| groupIX   | 15060706 | 15238842 | G2 | n   | ENSGACG00000018990 | KHSRP (2 of 2)  | RNA binding                                                                                                                                                                                                                                                                                                                          |
| groupIX   | 15060706 | 15238842 | G2 | n   | ENSGACG00000019032 | PCYT2 (1 of 2)  | biosynthetic process, catalytic activity, nucleotidyltransferase activity                                                                                                                                                                                                                                                            |
| groupIX   | 16135754 | 16206218 | G2 | psR | ENSGACG00000019256 | SRP68           | protein binding                                                                                                                                                                                                                                                                                                                      |
| groupIX   | 16135754 | 16206218 | G2 | psR | ENSGACG00000019260 | -               | -                                                                                                                                                                                                                                                                                                                                    |
| groupIX   | 16135754 | 16206218 | G2 | psR | ENSGACG00000019266 | TEN1            | -                                                                                                                                                                                                                                                                                                                                    |
| groupIX   | 16135754 | 16206218 | G2 | psR | ENSGACG00000019268 | ACOX1           | oxidation-reduction process, metabolic process, fatty acid beta-oxidation, peroxisome, oxidoreductase activity, acting on the CH-CH group of donors, acyl-CoA oxidase activity, acyl-CoA dehydrogenase activity                                                                                                                      |
| groupIX   | 16135754 | 16206218 | G2 | psR | ENSGACG00000019276 | AA-T-(1-of-3)   | metabolic process, N-acetyltransferase activity                                                                                                                                                                                                                                                                                      |
| groupIX   | 16135754 | 16206218 | G2 | psR | ENSGACG00000019254 | DDX5 (2 of 2)   | nucleic acid binding, ATP binding, helicase activity, ATP-dependent helicase activity                                                                                                                                                                                                                                                |
| groupIX   | 16135754 | 16206218 | G2 | psR | ENSGACG00000019272 | RHBDF2          | integral to membrane, serine-type endopeptidase activity                                                                                                                                                                                                                                                                             |
| groupV    | 1224812  | 1243812  | G2 | n   | ENSGACG00000002546 | OAT             | pyridoxal phosphate binding, transaminase activity                                                                                                                                                                                                                                                                                   |
| groupV    | 1224812  | 1243812  | G2 | n   | ENSGACG00000002578 | LHPP            | metabolic process, catalytic activity                                                                                                                                                                                                                                                                                                |
| groupVI   | 3404108  | 3425287  | G2 | bg  | ENSGACG00000003502 | C10orf54        | -                                                                                                                                                                                                                                                                                                                                    |
| groupVI   | 3404108  | 3425287  | G2 | bg  | ENSGACG00000003475 | CDH23           | cell adhesion, homophilic cell adhesion, detection of mechanical stimulus involved in sensory perception, inner ear receptor stereocilium organization, hair cell differentiation, cell projection organization, sensory perception of sound, equilibrioception, endocytosis, membrane, plasma membrane, cilium, calcium ion binding |
| groupVI   | 13209781 | 13223165 | G2 | psR | ENSGACG00000010558 | TNFAIP3         | DNA binding, zinc ion binding                                                                                                                                                                                                                                                                                                        |
| groupVI   | 13209781 | 13223165 | G2 | psR | ENSGACG00000010566 | PERP            | membrane                                                                                                                                                                                                                                                                                                                             |
| groupVII  | 12440865 | 12449865 | G2 | psL | -                  | -               | -                                                                                                                                                                                                                                                                                                                                    |
| groupVII  | 13310286 | 13323703 | G2 | n   | ENSGACG00000020196 | WNT11           | multicellular organismal development, Wnt receptor signaling pathway, calcium modulating pathway, cell migration involved in gastrulation, heart development, extracellular region                                                                                                                                                   |
| groupVII  | 14576890 | 14634661 | G2 | psR | ENSGACG00000020233 | HSPB1           | response to arsenic-containing substance, response to heat, cytoplasm, nucleus                                                                                                                                                                                                                                                       |
| groupVII  | 14576890 | 14634661 | G2 | psR | ENSGACG00000020234 | YWHAG (1 of 2)  | brain development, heart development                                                                                                                                                                                                                                                                                                 |
| groupVII  | 14576890 | 14634661 | G2 | psR | ENSGACG00000020235 | SRCRB4D         | membrane, scavenger receptor activity                                                                                                                                                                                                                                                                                                |
| groupVII  | 18002763 | 18019506 | G2 | n   | ENSGACG00000020402 | MPDU1 (2 of 2)  | -                                                                                                                                                                                                                                                                                                                                    |
| groupVII  | 18002763 | 18019506 | G2 | n   | ENSGACG00000020403 | -               | -                                                                                                                                                                                                                                                                                                                                    |
| groupVII  | 18174445 | 18191445 | G2 | psR | ENSGACG00000020415 | -               | protein binding                                                                                                                                                                                                                                                                                                                      |
| groupVII  | 18586964 | 18633965 | G2 | psL | ENSGACG00000020442 | CD248 (2 of 2)  | binding                                                                                                                                                                                                                                                                                                                              |
| groupVII  | 18586964 | 18633965 | G2 | psL | ENSGACG00000020439 | -               | protein binding, phospholipid binding                                                                                                                                                                                                                                                                                                |
| groupVII  | 18586964 | 18633965 | G2 | psL | ENSGACG00000020441 | DPP3            | proteolysis, cytoplasm, dipeptidyl-peptidase activity                                                                                                                                                                                                                                                                                |
| groupVII  | 18586964 | 18633965 | G2 | psL | ENSGACG00000020440 | RBM14 (2 of 2)  | nucleic acid binding                                                                                                                                                                                                                                                                                                                 |
| groupVII  | 22146415 | 22169415 | G2 | n   | ENSGACG00000020667 | -               | transport, ion transport, membrane, integral to membrane, postsynaptic membrane, extracellular ligand-gated ion channel activity, transport, ion transport, membrane, integral to membrane, postsynaptic membrane, extracellular ligand-gated ion channel activity                                                                   |
| groupVII  | 22146415 | 22169415 | G2 | n   | ENSGACG00000020668 | PHLDB2 (2 of 2) | protein binding                                                                                                                                                                                                                                                                                                                      |
| groupVIII | 5868880  | 5882072  | G2 | -   | ENSGACG00000005939 | -               | ligase activity                                                                                                                                                                                                                                                                                                                      |
| groupVIII | 11868896 | 11881896 | G2 | psR | -                  | -               | -                                                                                                                                                                                                                                                                                                                                    |

|           |          |          |    |     |                     |                  |                                                                                                                                                                                                                                                                                                                                                                                                                         |
|-----------|----------|----------|----|-----|---------------------|------------------|-------------------------------------------------------------------------------------------------------------------------------------------------------------------------------------------------------------------------------------------------------------------------------------------------------------------------------------------------------------------------------------------------------------------------|
| groupVIII | 12045594 | 12136594 | G2 | psR | ENSGACG00000009517  | ELTD1            | G-protein coupled receptor signaling pathway, cell surface receptor signaling pathway, neuropeptide signaling pathway, membrane, integral to membrane, G-protein coupled receptor activity, calcium ion binding, transmembrane signaling receptor activity, protein binding                                                                                                                                             |
| groupVIII | 19195726 | 19223726 | G2 | n   | ENSGACG00000014574  | -                | binding, protein binding                                                                                                                                                                                                                                                                                                                                                                                                |
| groupVIII | 19195726 | 19223726 | G2 | n   | ENSGACG00000014584  | SELRC1           | -                                                                                                                                                                                                                                                                                                                                                                                                                       |
| groupVIII | 19195726 | 19223726 | G2 | n   | ENSGACG00000014569  | ECHDC2           | metabolic process, catalytic activity                                                                                                                                                                                                                                                                                                                                                                                   |
| groupVIII | 19195726 | 19223726 | G2 | n   | ENSGACG00000014587  | -                | small GTPase mediated signal transduction, intracellular, protein binding, guanyl-nucleotide exchange factor activity                                                                                                                                                                                                                                                                                                   |
| groupX    | 3305886  | 3317993  | G2 | n   | ENSGACG00000002923  | PRRT1            | -                                                                                                                                                                                                                                                                                                                                                                                                                       |
| groupX    | 3305886  | 3317993  | G2 | n   | ENSGACG00000002927  | SKIV2L           | regulation of transcription, DNA-dependent, transcription initiation, DNA-dependent, sequence-specific DNA binding transcription factor activity, nucleic acid binding, DNA binding, ATP binding, nucleotide binding, hydrolase activity, acting on acid anhydrides, in phosphorus-containing anhydrides, sigma factor activity, helicase activity, ATP-dependent helicase activity, nucleoside-triphosphatase activity |
| groupX    | 6362007  | 6594901  | G2 | psR | ENSGACG00000004109  | DUS3L            | oxidation-reduction process, tRNA processing, nucleic acid binding, zinc ion binding, flavin adenine dinucleotide binding, tRNA dihydrouridine synthase activity                                                                                                                                                                                                                                                        |
| groupX    | 6362007  | 6594901  | G2 | psR | ENSGACG00000004141  | -                | -                                                                                                                                                                                                                                                                                                                                                                                                                       |
| groupX    | 6362007  | 6594901  | G2 | psR | ENSGACG00000004161  | CYP51A1          | iron ion binding, electron carrier activity, heme binding, oxidoreductase activity, acting on paired donors, with incorporation or reduction of molecular oxygen                                                                                                                                                                                                                                                        |
| groupX    | 6362007  | 6594901  | G2 | psR | ENSGACG00000004184  | -                | intracellular signal transduction, lipid metabolic process, phospholipase C activity, phosphoric diester hydrolase activity                                                                                                                                                                                                                                                                                             |
| groupX    | 6362007  | 6594901  | G2 | psR | ENSGACG00000004192  | MRPL9            | -                                                                                                                                                                                                                                                                                                                                                                                                                       |
| groupX    | 6362007  | 6594901  | G2 | psR | ENSGACG00000004195  | PRCC             | -                                                                                                                                                                                                                                                                                                                                                                                                                       |
| groupX    | 6362007  | 6594901  | G2 | psR | ENSGACG00000004206  | MRPL24           | translation, intracellular, ribosome, structural constituent of ribosome                                                                                                                                                                                                                                                                                                                                                |
| groupX    | 6362007  | 6594901  | G2 | psR | ENSGACG000000022181 | -                | -                                                                                                                                                                                                                                                                                                                                                                                                                       |
| groupX    | 6362007  | 6594901  | G2 | psR | ENSGACG00000004231  | TMEM79 (1 of 2)  | -                                                                                                                                                                                                                                                                                                                                                                                                                       |
| groupX    | 6362007  | 6594901  | G2 | psR | ENSGACG00000004084  | CNDP2            | metabolic process, hydrolase activity                                                                                                                                                                                                                                                                                                                                                                                   |
| groupX    | 6362007  | 6594901  | G2 | psR | ENSGACG00000004168  | KRIT1            | regulation of transcription, DNA-dependent, cytoskeleton, sequence-specific DNA binding transcription factor activity, protein binding                                                                                                                                                                                                                                                                                  |
| groupX    | 6362007  | 6594901  | G2 | psR | ENSGACG00000004199  | HDGFL1           | -                                                                                                                                                                                                                                                                                                                                                                                                                       |
| groupX    | 6362007  | 6594901  | G2 | psR | ENSGACG00000004219  | BCAN (2 of 2)    | cell adhesion, calcium ion binding, binding, protein binding, hyaluronic acid binding                                                                                                                                                                                                                                                                                                                                   |
| groupX    | 6362007  | 6594901  | G2 | psR | ENSGACG00000004227  | MEF2D            | skeletal muscle myosin thick filament assembly, positive regulation of transcription from RNA polymerase II promoter, transcription regulatory region sequence-specific DNA binding                                                                                                                                                                                                                                     |
| groupX    | 6362007  | 6594901  | G2 | psR | ENSGACG00000004143  | PCNT             | vesicle-mediated transport, fucose metabolic process, membrane, cytoplasm, nucleotide binding, L-fucose isomerase activity                                                                                                                                                                                                                                                                                              |
| groupX    | 6610706  | 6628713  | G2 | psR | ENSGACG000000022304 | -                | -                                                                                                                                                                                                                                                                                                                                                                                                                       |
| groupX    | 6610706  | 6628713  | G2 | psR | ENSGACG000000022220 | -                | -                                                                                                                                                                                                                                                                                                                                                                                                                       |
| groupX    | 6644058  | 6682058  | G2 | bg  | ENSGACG00000004267  | -                | intracellular, zinc ion binding                                                                                                                                                                                                                                                                                                                                                                                         |
| groupX    | 6644058  | 6682058  | G2 | bg  | ENSGACG00000004307  | HCN3 (2 of 2)    | -                                                                                                                                                                                                                                                                                                                                                                                                                       |
| groupX    | 6644058  | 6682058  | G2 | bg  | ENSGACG00000004315  | -                | -                                                                                                                                                                                                                                                                                                                                                                                                                       |
| groupX    | 6644058  | 6682058  | G2 | bg  | ENSGACG00000004248  | -                | intracellular signal transduction, nucleus, DNA binding, zinc ion binding, protein binding                                                                                                                                                                                                                                                                                                                              |
| groupX    | 6644058  | 6682058  | G2 | bg  | ENSGACG00000004271  | NDUFV1           | oxidation-reduction process, NADH dehydrogenase (ubiquinone) activity, oxidoreductase activity, acting on NADH or NADPH, 4 iron, 4 sulfur cluster binding, NAD binding, FMN binding                                                                                                                                                                                                                                     |
| groupX    | 6684363  | 6815339  | G2 | n   | ENSGACG00000004318  | -                | protein binding                                                                                                                                                                                                                                                                                                                                                                                                         |
| groupX    | 6684363  | 6815339  | G2 | n   | ENSGACG00000004387  | ZNF687 (1 of 2)  | intracellular, nucleic acid binding, zinc ion binding                                                                                                                                                                                                                                                                                                                                                                   |
| groupX    | 6684363  | 6815339  | G2 | n   | ENSGACG00000004393  | AQP10 (1 of 2)   | transport, transmembrane transport, water transport, membrane, integral to membrane, transporter activity                                                                                                                                                                                                                                                                                                               |
| groupX    | 6684363  | 6815339  | G2 | n   | ENSGACG00000004434  | HAX1             | -                                                                                                                                                                                                                                                                                                                                                                                                                       |
| groupX    | 6684363  | 6815339  | G2 | n   | ENSGACG00000004466  | C1orf43 (1 of 2) | oxidoreductase activity                                                                                                                                                                                                                                                                                                                                                                                                 |
| groupX    | 6684363  | 6815339  | G2 | n   | ENSGACG00000004486  | PYGO2            | zinc ion binding, protein binding                                                                                                                                                                                                                                                                                                                                                                                       |
| groupX    | 6684363  | 6815339  | G2 | n   | ENSGACG00000004501  | -                | calcium ion binding                                                                                                                                                                                                                                                                                                                                                                                                     |
| groupX    | 6684363  | 6815339  | G2 | n   | ENSGACG00000004332  | PSMD4 (2 of 2)   | phosphatidylinositol metabolic process, protein binding, phosphatidylinositol phosphate kinase activity                                                                                                                                                                                                                                                                                                                 |
| groupX    | 6684363  | 6815339  | G2 | n   | ENSGACG00000004446  | UBAP2L           | protein binding                                                                                                                                                                                                                                                                                                                                                                                                         |
| groupX    | 6684363  | 6815339  | G2 | n   | ENSGACG00000004468  | TUFT1 (1 of 2)   | -                                                                                                                                                                                                                                                                                                                                                                                                                       |

|         |          |          |    |     |                     |                   |                                                                                                                                                                                                     |
|---------|----------|----------|----|-----|---------------------|-------------------|-----------------------------------------------------------------------------------------------------------------------------------------------------------------------------------------------------|
| groupX  | 6684363  | 6815339  | G2 | n   | ENSGACG00000004475  | -                 | vesicle-mediated transport, membrane, myosin complex, motor activity                                                                                                                                |
| groupX  | 6684363  | 6815339  | G2 | n   | ENSGACG00000004491  | SHE (1 of 2)      | protein binding                                                                                                                                                                                     |
| groupX  | 6684363  | 6815339  | G2 | n   | ENSGACG00000004506  | -                 | -                                                                                                                                                                                                   |
| groupX  | 6953048  | 6976053  | G2 | n   | ENSGACG00000004537  | DPM3              | -                                                                                                                                                                                                   |
| groupX  | 6953048  | 6976053  | G2 | n   | ENSGACG00000004534  | EF-1-(1-of-2)     | membrane                                                                                                                                                                                            |
| groupX  | 7350525  | 7443525  | G2 | n   | ENSGACG00000004817  | RPRD1A            | -                                                                                                                                                                                                   |
| groupX  | 7350525  | 7443525  | G2 | n   | ENSGACG000000021205 | -                 | -                                                                                                                                                                                                   |
| groupX  | 7350525  | 7443525  | G2 | n   | ENSGACG000000022312 | -                 | -                                                                                                                                                                                                   |
| groupX  | 7350525  | 7443525  | G2 | n   | ENSGACG00000004879  | C11orf70          | -                                                                                                                                                                                                   |
| groupX  | 7350525  | 7443525  | G2 | n   | ENSGACG00000004837  | -                 | intracellular, nucleic acid binding, zinc ion binding                                                                                                                                               |
| groupX  | 7350525  | 7443525  | G2 | n   | ENSGACG00000004846  | NFYC              | retina development in camera-type eye, intracellular, DNA binding, sequence-specific DNA binding                                                                                                    |
| groupX  | 7350525  | 7443525  | G2 | n   | ENSGACG00000004872  | KCNQ4             | ion transport, transmembrane transport, membrane, ion channel activity                                                                                                                              |
| groupX  | 7524845  | 7538845  | G2 | -   | -                   | -                 | -                                                                                                                                                                                                   |
| groupX  | 7728807  | 7870807  | G2 | n   | ENSGACG00000005101  | TRIB1             | protein phosphorylation, ATP binding, protein kinase activity, transferase activity, transferring phosphorus-containing groups, protein serine/threonine kinase activity                            |
| groupX  | 7728807  | 7870807  | G2 | n   | ENSGACG00000005113  | FAM91A1           | heme binding, oxygen binding                                                                                                                                                                        |
| groupX  | 7728807  | 7870807  | G2 | n   | ENSGACG00000005128  | KLHL38 (1 of 2)   | protein binding                                                                                                                                                                                     |
| groupX  | 7728807  | 7870807  | G2 | n   | ENSGACG00000005164  | ATP6V1C1 (1 of 2) | ATP hydrolysis coupled proton transport, proton-transporting V-type ATPase, V1 domain, hydrolase activity, acting on acid anhydrides, catalyzing transmembrane movement of substances               |
| groupX  | 7728807  | 7870807  | G2 | n   | ENSGACG00000005193  | ADNP2             | regulation of transcription, DNA-dependent, intracellular, sequence-specific DNA binding transcription factor activity, zinc ion binding, sequence-specific DNA binding, protein binding            |
| groupX  | 7728807  | 7870807  | G2 | n   | ENSGACG00000005197  | GGCT              | -                                                                                                                                                                                                   |
| groupX  | 7728807  | 7870807  | G2 | n   | ENSGACG00000005220  | ANKIB1 (2 of 2)   | zinc ion binding, protein binding                                                                                                                                                                   |
| groupX  | 7728807  | 7870807  | G2 | n   | ENSGACG00000005235  | -                 | -                                                                                                                                                                                                   |
| groupX  | 7728807  | 7870807  | G2 | n   | ENSGACG00000005147  | SPIRE1 (2 of 2)   | protein binding                                                                                                                                                                                     |
| groupX  | 7728807  | 7870807  | G2 | n   | ENSGACG00000005185  | AZIN1 (2 of 2)    | catalytic activity                                                                                                                                                                                  |
| groupX  | 7728807  | 7870807  | G2 | n   | ENSGACG00000005201  | SNRPD1            | heart development                                                                                                                                                                                   |
| groupX  | 9077385  | 9098535  | G2 | psR | ENSGACG00000006390  | BTD               | nitrogen compound metabolic process, hydrolase activity, acting on carbon-nitrogen (but not peptide) bonds, hydrolase activity, acting on carbon-nitrogen (but not peptide) bonds, in linear amides |
| groupX  | 9077385  | 9098535  | G2 | psR | ENSGACG00000006364  | ANKRD28 (2 of 2)  | protein binding                                                                                                                                                                                     |
| groupX  | 9077385  | 9098535  | G2 | psR | ENSGACG00000006404  | SNX13             | cell communication, signal transducer activity, phosphatidylinositol binding, protein binding                                                                                                       |
| groupX  | 9254974  | 9298014  | G2 | n   | ENSGACG00000006571  | CASD1             | -                                                                                                                                                                                                   |
| groupX  | 9254974  | 9298014  | G2 | n   | ENSGACG00000006592  | SGCE              | membrane, sarcoglycan complex, calcium ion binding                                                                                                                                                  |
| groupX  | 9254974  | 9298014  | G2 | n   | ENSGACG00000006511  | COL1A2            | signal transduction, collagen, extracellular matrix structural constituent, receptor binding                                                                                                        |
| groupX  | 15469805 | 15504805 | G2 | psL | ENSGACG00000010358  | -                 | intracellular signal transduction, cyclic nucleotide biosynthetic process, phosphorus-oxygen lyase activity                                                                                         |
| groupX  | 15469805 | 15504805 | G2 | psL | ENSGACG00000010362  | -                 | protein phosphorylation, ATP binding, protein kinase activity, transferase activity, transferring phosphorus-containing groups, protein serine/threonine kinase activity                            |
| groupXI | 893197   | 933364   | G2 | psR | ENSGACG00000005143  | COL1A1 (2 of 2)   | signal transduction, regulation of ossification, collagen, cytoplasm, extracellular matrix structural constituent, receptor binding, protein binding, peptidase inhibitor activity                  |
| groupXI | 985885   | 1020885  | G2 | psR | ENSGACG00000005261  | CYB561            | integral to membrane                                                                                                                                                                                |
| groupXI | 985885   | 1020885  | G2 | psR | ENSGACG00000005267  | -                 | -                                                                                                                                                                                                   |
| groupXI | 985885   | 1020885  | G2 | psR | ENSGACG00000005270  | -                 | electron carrier activity, protein binding, iron-sulfur cluster binding                                                                                                                             |
| groupXI | 1765789  | 1790789  | G2 | n   | -                   | -                 | -                                                                                                                                                                                                   |
| groupXI | 1810065  | 1845065  | G2 | psR | -                   | -                 | -                                                                                                                                                                                                   |
| groupXI | 1848389  | 1879389  | G2 | n   | -                   | -                 | -                                                                                                                                                                                                   |
| groupXI | 1932570  | 1961573  | G2 | -   | ENSGACG00000005654  | PRAF2             | -                                                                                                                                                                                                   |
| groupXI | 1932570  | 1961573  | G2 | -   | ENSGACG00000022243  | -                 | -                                                                                                                                                                                                   |



|         |         |         |    |     |                    |                   |                                                                                                                                                                                                                                                                                                                                                                                                                   |
|---------|---------|---------|----|-----|--------------------|-------------------|-------------------------------------------------------------------------------------------------------------------------------------------------------------------------------------------------------------------------------------------------------------------------------------------------------------------------------------------------------------------------------------------------------------------|
| groupXI | 1932570 | 1961573 | G2 | -   | ENSGACG00000005644 | NFE2L1 (2 of 2)   | regulation of transcription, DNA-dependent, sequence-specific DNA binding transcription factor activity, DNA binding, sequence-specific DNA binding, protein dimerization activity                                                                                                                                                                                                                                |
| groupXI | 1932570 | 1961573 | G2 | -   | ENSGACG00000005661 | COPZ2             | transport                                                                                                                                                                                                                                                                                                                                                                                                         |
| groupXI | 5429098 | 5888371 | G2 | psR | ENSGACG00000008434 | FAM134C           | -                                                                                                                                                                                                                                                                                                                                                                                                                 |
| groupXI | 5429098 | 5888371 | G2 | psR | ENSGACG00000008462 | -                 | GTP catabolic process, microtubule-based process, protein polymerization, protein complex, microtubule, GTPase activity, GTP binding                                                                                                                                                                                                                                                                              |
| groupXI | 5429098 | 5888371 | G2 | psR | ENSGACG00000008483 | -                 | cell adhesion, calcium ion binding, protein binding                                                                                                                                                                                                                                                                                                                                                               |
| groupXI | 5429098 | 5888371 | G2 | psR | ENSGACG00000008501 | RAMP2             | intracellular protein transport, regulation of G-protein coupled receptor protein signaling pathway, integral to membrane, protein transporter activity                                                                                                                                                                                                                                                           |
| groupXI | 5429098 | 5888371 | G2 | psR | ENSGACG00000008510 | -                 | cation transport, pore complex assembly, hemolysis in other organism involved in symbiotic interaction, pore complex, channel activity                                                                                                                                                                                                                                                                            |
| groupXI | 5429098 | 5888371 | G2 | psR | ENSGACG00000008514 | -                 | cation transport, pore complex assembly, hemolysis in other organism involved in symbiotic interaction, pore complex, channel activity                                                                                                                                                                                                                                                                            |
| groupXI | 5429098 | 5888371 | G2 | psR | ENSGACG00000008523 | FZD2              | cilium assembly, heart looping, Wnt receptor signaling pathway, calcium modulating pathway, cell migration, non-canonical Wnt receptor signaling pathway involved in heart development, heart jogging, sensory epithelium regeneration, determination of left/right symmetry, convergent extension involved in gastrulation, endocrine pancreas development, plasma membrane                                      |
| groupXI | 5429098 | 5888371 | G2 | psR | ENSGACG00000008527 | -                 | protein phosphorylation, ATP binding, protein kinase activity, protein binding, transferase activity, transferring phosphorus-containing groups, protein serine/threonine kinase activity                                                                                                                                                                                                                         |
| groupXI | 5429098 | 5888371 | G2 | psR | ENSGACG00000008535 | HSD17B1P1         | oxidation-reduction process, metabolic process, estrogen biosynthetic process, androgen metabolic process, cytoplasm, oxidoreductase activity, estradiol 17-beta-dehydrogenase activity, steroid dehydrogenase activity                                                                                                                                                                                           |
| groupXI | 5429098 | 5888371 | G2 | psR | ENSGACG00000008544 | -                 | protein phosphorylation, ATP binding, protein kinase activity, transferase activity, transferring phosphorus-containing groups, protein serine/threonine kinase activity                                                                                                                                                                                                                                          |
| groupXI | 5429098 | 5888371 | G2 | psR | ENSGACG00000008605 | PTRF (2 of 2)     | -                                                                                                                                                                                                                                                                                                                                                                                                                 |
| groupXI | 5429098 | 5888371 | G2 | psR | ENSGACG00000008607 | STAT3             | regulation of transcription, DNA-dependent, signal transduction, motor axon guidance, epithelial to mesenchymal transition, establishment of planar polarity, establishment of cell polarity, positive regulation of glial cell proliferation, cell migration involved in gastrulation, nucleus, sequence-specific DNA binding transcription factor activity, signal transducer activity, protein binding         |
| groupXI | 5429098 | 5888371 | G2 | psR | ENSGACG00000008634 | -                 | regulation of transcription, DNA-dependent, signal transduction, erythrocyte development, JAK-STAT cascade, lymphocyte differentiation, positive regulation of myeloid cell differentiation, positive regulation of transcription from RNA polymerase II promoter, erythrocyte differentiation, nucleus, sequence-specific DNA binding transcription factor activity, signal transducer activity, protein binding |
| groupXI | 5429098 | 5888371 | G2 | psR | ENSGACG00000008659 | RAB5C (2 of 2)    | signal transduction, GTP catabolic process, small GTPase mediated signal transduction, intracellular protein transport, nucleocytoplasmic transport, protein transport, intracellular, GTPase activity, GTP binding                                                                                                                                                                                               |
| groupXI | 5429098 | 5888371 | G2 | psR | ENSGACG00000008679 | KAT2A             | regulation of transcription, DNA-dependent, metabolic process, nucleus, protein binding, N-acetyltransferase activity, histone acetyltransferase activity                                                                                                                                                                                                                                                         |
| groupXI | 5429098 | 5888371 | G2 | psR | ENSGACG00000008740 | DHX58             | nucleic acid binding, DNA binding, ATP binding, hydrolase activity, nucleotide binding, helicase activity, ATP-dependent helicase activity, nucleoside-triphosphatase activity                                                                                                                                                                                                                                    |
| groupXI | 5429098 | 5888371 | G2 | psR | ENSGACG00000008459 | -                 | -                                                                                                                                                                                                                                                                                                                                                                                                                 |
| groupXI | 5429098 | 5888371 | G2 | psR | ENSGACG00000008473 | PLEKHH3           | signal transduction, cytoskeleton, protein binding                                                                                                                                                                                                                                                                                                                                                                |
| groupXI | 5429098 | 5888371 | G2 | psR | ENSGACG00000008517 | C1QL1 (1 of 2)    | protein binding                                                                                                                                                                                                                                                                                                                                                                                                   |
| groupXI | 5429098 | 5888371 | G2 | psR | ENSGACG00000008532 | -                 | -                                                                                                                                                                                                                                                                                                                                                                                                                 |
| groupXI | 5429098 | 5888371 | G2 | psR | ENSGACG00000008553 | ATP6V0A1 (2 of 2) | regulation of transcription, DNA-dependent, ATP hydrolysis coupled proton transport, intracellular, proton-transporting two-sector ATPase complex, proton-transporting domain, sequence-specific DNA binding transcription factor activity, sequence-specific DNA binding, hydrogen ion transmembrane transporter activity                                                                                        |
| groupXI | 5429098 | 5888371 | G2 | psR | ENSGACG00000008641 | -                 | signal transduction, intracellular signal transduction, lipid metabolic process, protein binding, phospholipase C activity, phosphatidylinositol phospholipase C activity, phosphoric diester hydrolase activity                                                                                                                                                                                                  |
| groupXI | 5429098 | 5888371 | G2 | psR | ENSGACG00000008648 | KCNH4 (2 of 2)    | regulation of transcription, DNA-dependent, signal transduction, ion transport, transmembrane transport, two-component signal transduction system (phosphorelay), membrane, signal transducer activity, protein binding, ion channel activity, two-component sensor activity                                                                                                                                      |
| groupXI | 5429098 | 5888371 | G2 | psR | ENSGACG00000008492 | EZH1              | G-protein coupled receptor signaling pathway, DNA repair, intracellular, heterotrimeric G-protein complex, signal transducer activity, DNA binding, zinc ion binding, binding, protein binding, endonuclease activity                                                                                                                                                                                             |

|           |          |          |    |     |                    |                   |                                                                                                                                                                                                                                                                                                                                                                                                        |
|-----------|----------|----------|----|-----|--------------------|-------------------|--------------------------------------------------------------------------------------------------------------------------------------------------------------------------------------------------------------------------------------------------------------------------------------------------------------------------------------------------------------------------------------------------------|
| groupXI   | 5429098  | 5888371  | G2 | psR | ENSGACG00000008519 | CCDC43            | -                                                                                                                                                                                                                                                                                                                                                                                                      |
| groupXI   | 6903683  | 6933683  | G2 | psR | ENSGACG00000009558 | ASIC2             | sodium ion transport, membrane, integral to membrane, sodium channel activity, ligand-gated sodium channel activity                                                                                                                                                                                                                                                                                    |
| groupXI   | 11935913 | 11987991 | G2 | n   | ENSGACG00000012598 | LUC7L3            | -                                                                                                                                                                                                                                                                                                                                                                                                      |
| groupXI   | 11935913 | 11987991 | G2 | n   | ENSGACG00000012606 | -                 | -                                                                                                                                                                                                                                                                                                                                                                                                      |
| groupXII  | 2644648  | 2664648  | G2 | bg  | -                  | -                 | -                                                                                                                                                                                                                                                                                                                                                                                                      |
| groupXII  | 2693188  | 2723188  | G2 | psL | ENSGACG00000003711 | -                 | cation transport, cation transmembrane transporter activity                                                                                                                                                                                                                                                                                                                                            |
| groupXII  | 2817568  | 2834568  | G2 | -   | ENSGACG00000003721 | CPNE9 (2 of 2)    | protein binding                                                                                                                                                                                                                                                                                                                                                                                        |
| groupXII  | 2836125  | 2906899  | G2 | n   | ENSGACG00000003739 | LHFPL4 (2 of 2)   | -                                                                                                                                                                                                                                                                                                                                                                                                      |
| groupXII  | 2836125  | 2906899  | G2 | n   | ENSGACG00000003767 | PLXNB1 (2 of 2)   | signal transduction, membrane, intracellular, protein binding                                                                                                                                                                                                                                                                                                                                          |
| groupXII  | 2836125  | 2906899  | G2 | n   | ENSGACG00000003742 | -                 | protein phosphorylation, ATP binding, protein kinase activity, transferase activity, transferring phosphorus-containing groups, protein serine/threonine kinase activity                                                                                                                                                                                                                               |
| groupXII  | 9691978  | 9727978  | G2 | psR | ENSGACG00000007367 | NOC2L             | binding                                                                                                                                                                                                                                                                                                                                                                                                |
| groupXII  | 9691978  | 9727978  | G2 | psR | ENSGACG00000007376 | SAMD11            | protein binding                                                                                                                                                                                                                                                                                                                                                                                        |
| groupXII  | 10205937 | 10218937 | G2 | psR | ENSGACG00000007935 | SLC16A4           | regulation of transcription, DNA-dependent, transmembrane transport, integral to membrane, intracellular, sequence-specific DNA binding transcription factor activity, sequence-specific DNA binding                                                                                                                                                                                                   |
| groupXII  | 10439988 | 10462317 | G2 | n   | ENSGACG00000008244 | C1orf106 (1 of 2) | -                                                                                                                                                                                                                                                                                                                                                                                                      |
| groupXII  | 10439988 | 10462317 | G2 | n   | ENSGACG00000008262 | FANCE             | translation, large ribosomal subunit, RNA binding, structural constituent of ribosome                                                                                                                                                                                                                                                                                                                  |
| groupXII  | 10439988 | 10462317 | G2 | n   | ENSGACG00000008285 | -                 | nucleic acid binding, zinc ion binding, protein binding                                                                                                                                                                                                                                                                                                                                                |
| groupXII  | 10439988 | 10462317 | G2 | n   | ENSGACG00000008288 | PPARD             | regulation of transcription, DNA-dependent, steroid hormone mediated signaling pathway, nucleus, sequence-specific DNA binding transcription factor activity, steroid hormone receptor activity, zinc ion binding, sequence-specific DNA binding                                                                                                                                                       |
| groupXII  | 10439988 | 10462317 | G2 | n   | ENSGACG00000008283 | -                 | -                                                                                                                                                                                                                                                                                                                                                                                                      |
| groupXII  | 10639119 | 10682119 | G2 | psL | ENSGACG00000008474 | -                 | ATP binding, nucleotide binding, nucleoside-triphosphatase activity                                                                                                                                                                                                                                                                                                                                    |
| groupXII  | 10639119 | 10682119 | G2 | psL | ENSGACG00000008477 | STAT6             | regulation of transcription, DNA-dependent, signal transduction, nucleus, sequence-specific DNA binding transcription factor activity, signal transducer activity, protein binding                                                                                                                                                                                                                     |
| groupXII  | 10639119 | 10682119 | G2 | psL | ENSGACG00000008484 | MIP (2 of 2)      | transport, transmembrane transport, water transport, lens development in camera-type eye, membrane, integral to membrane, transporter activity, water transmembrane transporter activity, water channel activity                                                                                                                                                                                       |
| groupXII  | 10639119 | 10682119 | G2 | psL | ENSGACG00000008508 | PTGES3 (2 of 2)   | -                                                                                                                                                                                                                                                                                                                                                                                                      |
| groupXII  | 10639119 | 10682119 | G2 | psL | ENSGACG00000008546 | DTX3              | zinc ion binding, protein binding                                                                                                                                                                                                                                                                                                                                                                      |
| groupXII  | 10837976 | 10881976 | G2 | n   | ENSGACG00000008755 | WNK3              | protein phosphorylation, ATP binding, protein kinase activity, transferase activity, transferring phosphorus-containing groups, protein serine/threonine kinase activity                                                                                                                                                                                                                               |
| groupXII  | 10837976 | 10881976 | G2 | n   | ENSGACG00000008770 | PHF8              | embryonic viscerocranium morphogenesis, regulation of neuron apoptotic process, brain development, zinc ion binding, protein binding                                                                                                                                                                                                                                                                   |
| groupXII  | 10837976 | 10881976 | G2 | n   | ENSGACG00000008789 | -                 | cellular protein modification process, intracellular, zinc ion binding, protein binding, acid-amino acid ligase activity                                                                                                                                                                                                                                                                               |
| groupXII  | 11850929 | 11866929 | G2 | n   | ENSGACG00000009569 | -                 | -                                                                                                                                                                                                                                                                                                                                                                                                      |
| groupXII  | 12862040 | 12918797 | G2 | n   | ENSGACG00000010294 | NOL4 (2 of 2)     | oxidation-reduction process, oxidoreductase activity, transition metal ion binding                                                                                                                                                                                                                                                                                                                     |
| groupXII  | 14259754 | 14273060 | G2 | bg  | ENSGACG00000011034 | MAGI3 (1 of 2)    | protein binding                                                                                                                                                                                                                                                                                                                                                                                        |
| groupXII  | 14515907 | 14544907 | G2 | psL | ENSGACG00000011124 | SALL4             | embryonic pectoral fin morphogenesis, positive regulation of fibroblast growth factor receptor signaling pathway, intracellular, DNA binding, zinc ion binding                                                                                                                                                                                                                                         |
| groupXII  | 14515907 | 14544907 | G2 | psL | ENSGACG00000011089 | ATP9A             | metabolic process, ATP biosynthetic process, phospholipid transport, membrane, integral to membrane, magnesium ion binding, ATP binding, catalytic activity, ATPase activity, coupled to transmembrane movement of ions, phosphorylative mechanism, phospholipid-translocating ATPase activity                                                                                                         |
| groupXIII | 609904   | 633904   | G2 | bg  | -                  | -                 | -                                                                                                                                                                                                                                                                                                                                                                                                      |
| groupXIII | 7788557  | 7881677  | G2 | psL | -                  | -                 | -                                                                                                                                                                                                                                                                                                                                                                                                      |
| groupXIII | 9866089  | 9885641  | G2 | n   | ENSGACG00000010134 | F2RL2 (2 of 2)    | G-protein coupled receptor signaling pathway, integral to membrane                                                                                                                                                                                                                                                                                                                                     |
| groupXIII | 9866089  | 9885641  | G2 | n   | ENSGACG00000010141 | -                 | -                                                                                                                                                                                                                                                                                                                                                                                                      |
| groupXIII | 9866089  | 9885641  | G2 | n   | ENSGACG00000010145 | -                 | -                                                                                                                                                                                                                                                                                                                                                                                                      |
| groupXIII | 9866089  | 9885641  | G2 | n   | ENSGACG00000010070 | -                 | regulation of transcription, DNA-dependent, signal transduction, small GTPase mediated signal transduction, regulation of small GTPase mediated signal transduction, intracellular, myosin complex, sequence-specific DNA binding transcription factor activity, motor activity, ATP binding, sequence-specific DNA binding, protein binding, GTPase activator activity, Ras GTPase activator activity |

|            |          |          |    |     |                    |                  |                                                                                                                                                                                                                                                                                                                                                   |
|------------|----------|----------|----|-----|--------------------|------------------|---------------------------------------------------------------------------------------------------------------------------------------------------------------------------------------------------------------------------------------------------------------------------------------------------------------------------------------------------|
| groupXIII  | 9866089  | 9885641  | G2 | n   | ENSGACG00000010138 | F2R              | G-protein coupled receptor signaling pathway, integral to membrane                                                                                                                                                                                                                                                                                |
| groupXIII  | 12350008 | 12393671 | G2 | psR | ENSGACG00000011169 | DBNL (1 of 2)    | intracellular, actin binding, protein binding                                                                                                                                                                                                                                                                                                     |
| groupXIII  | 12350008 | 12393671 | G2 | psR | ENSGACG00000011172 | UBE2D4           | acid-amino acid ligase activity                                                                                                                                                                                                                                                                                                                   |
| groupXIII  | 12350008 | 12393671 | G2 | psR | ENSGACG00000011184 | TCF7L1           | generation of neurons, rostrocaudal neural tube patterning, cell proliferation in dorsal spinal cord, midbrain development, brain segmentation, hindbrain development, embryonic pattern specification, positive regulation of cell proliferation, DNA binding, protein binding                                                                   |
| groupXIII  | 13906591 | 13932592 | G2 | psR | ENSGACG00000012153 | ASB6             | intracellular signal transduction, protein binding                                                                                                                                                                                                                                                                                                |
| groupXIII  | 14377287 | 14388994 | G2 | psR | -                  | -                | -                                                                                                                                                                                                                                                                                                                                                 |
| groupXIV   | 12178560 | 12206818 | G2 | bg  | -                  | -                | -                                                                                                                                                                                                                                                                                                                                                 |
| groupXIV   | 12598601 | 12679907 | G2 | psR | ENSGACG00000018194 | -                | -                                                                                                                                                                                                                                                                                                                                                 |
| groupXIV   | 12789928 | 12841994 | G2 | bg  | ENSGACG00000018217 | UNC13B (1 of 2)  | intracellular signal transduction, protein binding                                                                                                                                                                                                                                                                                                |
| groupXV    | 4791811  | 4821811  | G2 | n   | ENSGACG00000007642 | -                | binding                                                                                                                                                                                                                                                                                                                                           |
| groupXV    | 4791811  | 4821811  | G2 | n   | ENSGACG00000007648 | TTC8             | pigment granule aggregation in cell center, heart looping, melanosome transport, Kupffer's vesicle development, convergent extension, intracellular transport, neural crest cell migration, protein binding                                                                                                                                       |
| groupXV    | 4791811  | 4821811  | G2 | n   | ENSGACG00000007688 | EML5             | protein binding                                                                                                                                                                                                                                                                                                                                   |
| groupXV    | 9197761  | 9236761  | G2 | psL | ENSGACG00000010507 | C15orf41         | -                                                                                                                                                                                                                                                                                                                                                 |
| groupXV    | 9245099  | 9271099  | G2 | psL | ENSGACG00000010507 | C15orf41         | -                                                                                                                                                                                                                                                                                                                                                 |
| groupXV    | 9495758  | 9516076  | G2 | n   | ENSGACG00000010542 | PTPN21           | protein dephosphorylation, dephosphorylation, heart morphogenesis, epithelial to mesenchymal transition, somitogenesis, cytoskeleton, protein tyrosine phosphatase activity, protein tyrosine/serine/threonine phosphatase activity, phosphatase activity                                                                                         |
| groupXV    | 9495758  | 9516076  | G2 | n   | ENSGACG00000010552 | SPATA7           | -                                                                                                                                                                                                                                                                                                                                                 |
| groupXV    | 9495758  | 9516076  | G2 | n   | ENSGACG00000010557 | KCNK10           | -                                                                                                                                                                                                                                                                                                                                                 |
| groupXVI   | 263451   | 295458   | G2 | n   | ENSGACG00000001462 | -                | growth factor activity                                                                                                                                                                                                                                                                                                                            |
| groupXVI   | 263451   | 295458   | G2 | n   | ENSGACG00000001457 | TMPRSS3          | proteolysis, membrane, catalytic activity, protein binding, serine-type endopeptidase activity, scavenger receptor activity                                                                                                                                                                                                                       |
| groupXVI   | 263451   | 295458   | G2 | n   | ENSGACG00000001463 | CCDC93           | vesicle-mediated transport, membrane, binding                                                                                                                                                                                                                                                                                                     |
| groupXVI   | 263451   | 295458   | G2 | n   | ENSGACG00000001456 | PKNOX1           | regulation of transcription, DNA-dependent, sequence-specific DNA binding transcription factor activity, sequence-specific DNA binding, protein binding                                                                                                                                                                                           |
| groupXVI   | 11890194 | 11900194 | G2 | psR | ENSGACG00000006226 | FAM126B          | -                                                                                                                                                                                                                                                                                                                                                 |
| groupXVI   | 13716843 | 13736843 | G2 | bg  | ENSGACG00000006889 | TSC22D1 (2 of 2) | regulation of transcription, DNA-dependent, sequence-specific DNA binding transcription factor activity                                                                                                                                                                                                                                           |
| groupXVI   | 13777089 | 13793089 | G2 | bg  | ENSGACG00000006935 | -                | oxidation-reduction process, cell surface receptor signaling pathway, metabolic process, cell migration involved in gastrulation, membrane, plasma membrane, oxidoreductase activity, transmembrane signaling receptor activity, protein binding                                                                                                  |
| groupXVI   | 13777089 | 13793089 | G2 | bg  | ENSGACG00000006937 | -                | G-protein coupled receptor signaling pathway, integral to membrane                                                                                                                                                                                                                                                                                |
| groupXVI   | 16845085 | 16860085 | G2 | n   | -                  | -                | -                                                                                                                                                                                                                                                                                                                                                 |
| groupXVII  | 4401113  | 4427173  | G2 | bg  | ENSGACG00000005966 | CDH22            | cell adhesion, homophilic cell adhesion, membrane, plasma membrane, calcium ion binding                                                                                                                                                                                                                                                           |
| groupXVIII | 6171569  | 6321391  | G2 | psR | ENSGACG00000007466 | -                | -                                                                                                                                                                                                                                                                                                                                                 |
| groupXVIII | 6171569  | 6321391  | G2 | psR | ENSGACG00000007478 | -                | -                                                                                                                                                                                                                                                                                                                                                 |
| groupXVIII | 6171569  | 6321391  | G2 | psR | ENSGACG00000007328 | HADHB            | metabolic process, catalytic activity, transferase activity, transferring acyl groups other than amino-acyl groups                                                                                                                                                                                                                                |
| groupXVIII | 6171569  | 6321391  | G2 | psR | ENSGACG00000007459 | FAM59B           | protein binding                                                                                                                                                                                                                                                                                                                                   |
| groupXVIII | 6171569  | 6321391  | G2 | psR | ENSGACG00000007463 | SYNE2 (2 of 2)   | actin binding, protein binding                                                                                                                                                                                                                                                                                                                    |
| groupXVIII | 6171569  | 6321391  | G2 | psR | ENSGACG00000007470 | -                | -                                                                                                                                                                                                                                                                                                                                                 |
| groupXVIII | 6171569  | 6321391  | G2 | psR | ENSGACG00000007483 | -                | protein binding                                                                                                                                                                                                                                                                                                                                   |
| groupXVIII | 6357926  | 6428130  | G2 | -   | ENSGACG00000007522 | JAG2             | multicellular organismal development, cell communication, Notch signaling pathway, pancreas development, spinal cord motor neuron differentiation, ventral spinal cord interneuron differentiation, pronephros development, liver development, membrane, integral to membrane, calcium ion binding, protein binding, peptidase inhibitor activity |
| groupXVIII | 6357926  | 6428130  | G2 | -   | ENSGACG00000007543 | NUDT14           | metal ion binding, hydrolase activity, hydrolase activity, acting on acid anhydrides, in phosphorus-containing anhydrides                                                                                                                                                                                                                         |
| groupXVIII | 6547823  | 6669253  | G2 | psR | ENSGACG00000007661 | ACTC1 (2 of 3)   | embryonic heart tube development, ATP binding                                                                                                                                                                                                                                                                                                     |
| groupXVIII | 6547823  | 6669253  | G2 | psR | ENSGACG00000007697 | ARHGAP11B        | signal transduction, intracellular                                                                                                                                                                                                                                                                                                                |
| groupXVIII | 6547823  | 6669253  | G2 | psR | ENSGACG00000007698 | -                | -                                                                                                                                                                                                                                                                                                                                                 |
| groupXVIII | 6547823  | 6669253  | G2 | psR | ENSGACG00000007699 | SCG5             | neuropeptide signaling pathway, secretory granule                                                                                                                                                                                                                                                                                                 |

|            |          |          |    |     |                     |                  |                                                                                                                                                                                                                                                                                                                                                                                                                                                                      |
|------------|----------|----------|----|-----|---------------------|------------------|----------------------------------------------------------------------------------------------------------------------------------------------------------------------------------------------------------------------------------------------------------------------------------------------------------------------------------------------------------------------------------------------------------------------------------------------------------------------|
| groupXVIII | 6547823  | 6669253  | G2 | psR | ENSGACG00000007742  | FNTB             | catalytic activity                                                                                                                                                                                                                                                                                                                                                                                                                                                   |
| groupXVIII | 6547823  | 6669253  | G2 | psR | ENSGACG00000007805  | -                | -                                                                                                                                                                                                                                                                                                                                                                                                                                                                    |
| groupXVIII | 6547823  | 6669253  | G2 | psR | ENSGACG00000007808  | MAX (1 of 2)     | regulation of transcription, DNA-dependent, nucleus                                                                                                                                                                                                                                                                                                                                                                                                                  |
| groupXVIII | 6547823  | 6669253  | G2 | psR | ENSGACG00000007823  | SLC10A1 (1 of 2) | sodium ion transport, membrane, bile acid:sodium symporter activity                                                                                                                                                                                                                                                                                                                                                                                                  |
| groupXVIII | 6547823  | 6669253  | G2 | psR | ENSGACG00000007704  | FMN1 (2 of 2)    | actin cytoskeleton organization, cellular component organization, actin binding                                                                                                                                                                                                                                                                                                                                                                                      |
| groupXVIII | 6547823  | 6669253  | G2 | psR | ENSGACG00000007722  | -                | regulation of transcription, DNA-dependent, signal transduction, GTP catabolic process, small GTPase mediated signal transduction, intracellular protein transport, nucleocytoplasmic transport, protein transport, intracellular, ATP binding, GTPase activity, GTP binding, transcription factor binding                                                                                                                                                           |
| groupXVIII | 8240442  | 8268442  | G2 | psR | ENSGACG00000008692  | C6orf211         | -                                                                                                                                                                                                                                                                                                                                                                                                                                                                    |
| groupXVIII | 8240442  | 8268442  | G2 | psR | ENSGACG00000008721  | -                | signal transduction, keratinization, membrane, cytoplasm, signal transducer activity, actin binding, protein binding                                                                                                                                                                                                                                                                                                                                                 |
| groupXVIII | 8240442  | 8268442  | G2 | psR | ENSGACG00000008711  | -                | regulation of transcription, DNA-dependent, steroid hormone mediated signaling pathway, response to chemical stimulus, response to estrogen stimulus, response to xenobiotic stimulus, response to estradiol stimulus, posterior lateral line neuromast primordium migration, nucleus, sequence-specific DNA binding transcription factor activity, steroid hormone receptor activity, DNA binding, zinc ion binding, steroid binding, sequence-specific DNA binding |
| groupXVIII | 10270215 | 10297458 | G2 | bg  | ENSGACG00000010336  | KCNH5            | regulation of transcription, DNA-dependent, signal transduction, G-protein coupled receptor signaling pathway, ion transport, transmembrane transport, two-component signal transduction system (phosphorelay), membrane, integral to membrane, signal transducer activity, protein binding, ion channel activity, two-component sensor activity                                                                                                                     |
| groupXVIII | 10270215 | 10297458 | G2 | bg  | ENSGACG00000010351  | SGPP1 (2 of 2)   | membrane, catalytic activity                                                                                                                                                                                                                                                                                                                                                                                                                                         |
| groupXVIII | 10270215 | 10297458 | G2 | bg  | ENSGACG00000010354  | ABCD4            | transport, transmembrane transport, membrane, integral to membrane, ATP binding, nucleotide binding, ATPase activity, ATPase activity, coupled to transmembrane movement of substances, nucleoside-triphosphatase activity                                                                                                                                                                                                                                           |
| groupXVIII | 10270215 | 10297458 | G2 | bg  | ENSGACG00000010318  | C14orf149        | proline racemase activity                                                                                                                                                                                                                                                                                                                                                                                                                                            |
| groupXX    | 6478533  | 6495533  | G2 | psL | ENSGACG00000006485  | DNAH5            | -                                                                                                                                                                                                                                                                                                                                                                                                                                                                    |
| groupXX    | 6705373  | 6744580  | G2 | n   | -                   | -                | -                                                                                                                                                                                                                                                                                                                                                                                                                                                                    |
| groupXX    | 8530415  | 8558415  | G2 | -   | ENSGACG00000007402  | -                | -                                                                                                                                                                                                                                                                                                                                                                                                                                                                    |
| groupXX    | 8530415  | 8558415  | G2 | -   | ENSGACG00000007407  | -                | -                                                                                                                                                                                                                                                                                                                                                                                                                                                                    |
| groupXX    | 8530415  | 8558415  | G2 | -   | ENSGACG00000007410  | -                | -                                                                                                                                                                                                                                                                                                                                                                                                                                                                    |
| groupXX    | 8530415  | 8558415  | G2 | -   | ENSGACG00000007412  | -                | intracellular, DNA binding, zinc ion binding                                                                                                                                                                                                                                                                                                                                                                                                                         |
| groupXX    | 8530415  | 8558415  | G2 | -   | ENSGACG00000007401  | DCBLD1           | -                                                                                                                                                                                                                                                                                                                                                                                                                                                                    |
| groupXX    | 9128634  | 9131634  | G2 | psL | ENSGACG00000007723  | -                | ion transport, membrane, ion channel activity                                                                                                                                                                                                                                                                                                                                                                                                                        |
| groupXX    | 9666746  | 9717835  | G2 | bg  | ENSGACG00000008216  | JAZF1 (1 of 2)   | cilium assembly, determination of left/right symmetry, intracellular, zinc ion binding                                                                                                                                                                                                                                                                                                                                                                               |
| groupXX    | 9666746  | 9717835  | G2 | bg  | ENSGACG00000008229  | HIBADH (2 of 2)  | oxidation-reduction process, valine metabolic process, pentose-phosphate shunt, NAD binding, 3-hydroxyisobutyrate dehydrogenase activity, phosphogluconate dehydrogenase (decarboxylating) activity                                                                                                                                                                                                                                                                  |
| groupXX    | 9666746  | 9717835  | G2 | bg  | ENSGACG00000008296  | HOXA13 (2 of 2)  | regulation of transcription, DNA-dependent, negative regulation of transcription, DNA-dependent, nucleus, sequence-specific DNA binding transcription factor activity, sequence-specific DNA binding, protein binding, nucleic acid binding transcription factor activity                                                                                                                                                                                            |
| groupXX    | 9666746  | 9717835  | G2 | bg  | ENSGACG00000008297  | HOXA11 (2 of 2)  | regulation of transcription, DNA-dependent, nucleus, sequence-specific DNA binding transcription factor activity, sequence-specific DNA binding, protein binding                                                                                                                                                                                                                                                                                                     |
| groupXX    | 9666746  | 9717835  | G2 | bg  | ENSGACG00000008221  | TAX1BP1 (1 of 2) | -                                                                                                                                                                                                                                                                                                                                                                                                                                                                    |
| groupXX    | 11592217 | 11627217 | G2 | n   | ENSGACG00000009917  | LPCAT3           | -                                                                                                                                                                                                                                                                                                                                                                                                                                                                    |
| groupXX    | 11592217 | 11627217 | G2 | n   | ENSGACG000000022746 | -                | -                                                                                                                                                                                                                                                                                                                                                                                                                                                                    |
| groupXX    | 11592217 | 11627217 | G2 | n   | ENSGACG00000009950  | TPI1             | metabolic process, triose-phosphate isomerase activity                                                                                                                                                                                                                                                                                                                                                                                                               |
| groupXX    | 11592217 | 11627217 | G2 | n   | ENSGACG00000010009  | -                | intracellular, zinc ion binding                                                                                                                                                                                                                                                                                                                                                                                                                                      |
| groupXX    | 11592217 | 11627217 | G2 | n   | ENSGACG00000009910  | CLSTN3           | homophilic cell adhesion, membrane, calcium ion binding                                                                                                                                                                                                                                                                                                                                                                                                              |
| groupXX    | 12573128 | 12584378 | G2 | bg  | ENSGACG00000011621  | KIAA0907         | -                                                                                                                                                                                                                                                                                                                                                                                                                                                                    |
| groupXX    | 18532025 | 18546043 | G2 | psL | -                   | -                | -                                                                                                                                                                                                                                                                                                                                                                                                                                                                    |
| groupXXI   | 7821341  | 7876695  | G2 | psR | ENSGACG00000003283  | FAM162B          | -                                                                                                                                                                                                                                                                                                                                                                                                                                                                    |
| groupXXI   | 7821341  | 7876695  | G2 | psR | ENSGACG00000003285  | KPNA1            | intracellular protein transport, protein import into nucleus, nucleus, cytoplasm, nuclear pore, binding, protein binding, protein transporter activity, intracellular protein transport, protein import into nucleus, nucleus, cytoplasm, nuclear pore, binding, protein binding, protein transporter activity                                                                                                                                                       |

|          |          |          |    |     |                     |                 |                                                                                                                                                                                                                                                                                  |
|----------|----------|----------|----|-----|---------------------|-----------------|----------------------------------------------------------------------------------------------------------------------------------------------------------------------------------------------------------------------------------------------------------------------------------|
| groupXXI | 7821341  | 7876695  | G2 | psR | ENSGACG00000003337  | -               | -                                                                                                                                                                                                                                                                                |
| groupXXI | 7821341  | 7876695  | G2 | psR | ENSGACG00000003341  | VIPR1 (1 of 2)  | G-protein coupled receptor signaling pathway, cell surface receptor signaling pathway, adenylate cyclase-modulating G-protein coupled receptor signaling pathway, membrane, integral to membrane, G-protein coupled receptor activity, transmembrane signaling receptor activity |
| groupI   | 244075   | 255075   | G1 | psL | ENSGACG00000004570  | ARRB1           | signal transduction, embryonic hemopoiesis, lateral mesoderm development, protein binding                                                                                                                                                                                        |
| groupI   | 4163494  | 4189494  | G1 | psR | ENSGACG00000006869  | TNFRSF19        | binding                                                                                                                                                                                                                                                                          |
| groupI   | 4163494  | 4189494  | G1 | psR | ENSGACG00000006872  | -               | -                                                                                                                                                                                                                                                                                |
| groupI   | 4163494  | 4189494  | G1 | psR | ENSGACG00000006874  | MIPEP           | proteolysis, metalloendopeptidase activity                                                                                                                                                                                                                                       |
| groupI   | 4624180  | 4658180  | G1 | -   | -                   | -               | -                                                                                                                                                                                                                                                                                |
| groupI   | 4736300  | 4762300  | G1 | n   | ENSGACG00000007125  | PTX3            | -                                                                                                                                                                                                                                                                                |
| groupI   | 4736300  | 4762300  | G1 | n   | ENSGACG00000007117  | VEPH1           | ear morphogenesis, brain development, protein binding                                                                                                                                                                                                                            |
| groupI   | 4773122  | 4844745  | G1 | n   | ENSGACG00000007144  | GOLIM4          | -                                                                                                                                                                                                                                                                                |
| groupI   | 4773122  | 4844745  | G1 | n   | ENSGACG00000007161  | SERPINI1        | -                                                                                                                                                                                                                                                                                |
| groupI   | 4773122  | 4844745  | G1 | n   | ENSGACG00000007171  | PDCD10 (2 of 2) | blood vessel development, vasculature development, embryo development, heart development                                                                                                                                                                                         |
| groupI   | 4773122  | 4844745  | G1 | n   | ENSGACG00000007177  | -               | protein binding                                                                                                                                                                                                                                                                  |
| groupI   | 4846724  | 4890512  | G1 | n   | -                   | -               | -                                                                                                                                                                                                                                                                                |
| groupI   | 10466227 | 10538227 | G1 | psR | ENSGACG000000010259 | P2RY1           | G-protein coupled receptor signaling pathway, integral to membrane                                                                                                                                                                                                               |
| groupI   | 10466227 | 10538227 | G1 | psR | ENSGACG000000010261 | -               | signal transduction, GTP catabolic process, small GTPase mediated signal transduction, intracellular protein transport, nucleocytoplasmic transport, protein transport, intracellular, GTPase activity, GTP binding                                                              |
| groupI   | 10466227 | 10538227 | G1 | psR | ENSGACG000000010268 | ARHGEF26        | -                                                                                                                                                                                                                                                                                |
| groupI   | 10466227 | 10538227 | G1 | psR | ENSGACG000000010276 | DHX36           | -                                                                                                                                                                                                                                                                                |
| groupI   | 10559223 | 10769223 | G1 | psR | ENSGACG000000010309 | -               | -                                                                                                                                                                                                                                                                                |
| groupI   | 10559223 | 10769223 | G1 | psR | ENSGACG000000010316 | -               | G-protein coupled receptor signaling pathway, integral to membrane, G-protein coupled receptor activity                                                                                                                                                                          |
| groupI   | 10559223 | 10769223 | G1 | psR | ENSGACG000000010322 | -               | G-protein coupled receptor signaling pathway, integral to membrane, G-protein coupled receptor activity                                                                                                                                                                          |
| groupI   | 10559223 | 10769223 | G1 | psR | ENSGACG000000010326 | -               | G-protein coupled receptor signaling pathway, integral to membrane, G-protein coupled receptor activity                                                                                                                                                                          |
| groupI   | 10559223 | 10769223 | G1 | psR | ENSGACG000000010329 | -               | G-protein coupled receptor signaling pathway, integral to membrane, G-protein coupled receptor activity                                                                                                                                                                          |
| groupI   | 10559223 | 10769223 | G1 | psR | ENSGACG000000010342 | -               | G-protein coupled receptor signaling pathway, integral to membrane, G-protein coupled receptor activity                                                                                                                                                                          |
| groupI   | 10559223 | 10769223 | G1 | psR | ENSGACG000000010344 | -               | G-protein coupled receptor signaling pathway, integral to membrane, G-protein coupled receptor activity                                                                                                                                                                          |
| groupI   | 10559223 | 10769223 | G1 | psR | ENSGACG000000010349 | -               | G-protein coupled receptor signaling pathway, integral to membrane, G-protein coupled receptor activity                                                                                                                                                                          |
| groupI   | 10559223 | 10769223 | G1 | psR | ENSGACG000000010364 | -               | G-protein coupled receptor signaling pathway, integral to membrane, G-protein coupled receptor activity                                                                                                                                                                          |
| groupI   | 10559223 | 10769223 | G1 | psR | ENSGACG000000010305 | MME             | proteolysis, metalloendopeptidase activity, metallopeptidase activity                                                                                                                                                                                                            |
| groupI   | 10559223 | 10769223 | G1 | psR | ENSGACG000000010323 | -               | G-protein coupled receptor signaling pathway, integral to membrane, G-protein coupled receptor activity                                                                                                                                                                          |
| groupI   | 10559223 | 10769223 | G1 | psR | ENSGACG000000010337 | -               | G-protein coupled receptor signaling pathway, integral to membrane, G-protein coupled receptor activity                                                                                                                                                                          |
| groupI   | 10559223 | 10769223 | G1 | psR | ENSGACG000000010313 | -               | G-protein coupled receptor signaling pathway, integral to membrane, G-protein coupled receptor activity                                                                                                                                                                          |
| groupI   | 10817455 | 10838466 | G1 | psR | ENSGACG000000010386 | C3orf33         | nucleic acid binding, hydrolase activity, acting on ester bonds                                                                                                                                                                                                                  |
| groupI   | 10817455 | 10838466 | G1 | psR | ENSGACG000000010389 | MED13 (2 of 2)  | regulation of transcription from RNA polymerase II promoter, mediator complex                                                                                                                                                                                                    |
| groupI   | 11597262 | 11647262 | G1 | psR | ENSGACG000000010833 | TAOK1 (2 of 2)  | protein phosphorylation, ATP binding, protein kinase activity, transferase activity, transferring phosphorus-containing groups, protein serine/threonine kinase activity                                                                                                         |
| groupI   | 11597262 | 11647262 | G1 | psR | ENSGACG000000010843 | TSR1            | ribosome biogenesis, nucleus                                                                                                                                                                                                                                                     |
| groupI   | 11597262 | 11647262 | G1 | psR | ENSGACG000000010848 | HIC1            | potassium ion transport, membrane, intracellular, voltage-gated potassium channel complex, zinc ion binding, protein binding, voltage-gated potassium channel activity, DNA binding                                                                                              |
| groupI   | 11597262 | 11647262 | G1 | psR | ENSGACG000000010818 | PAF1            | Cdc73/Paf1 complex                                                                                                                                                                                                                                                               |
| groupI   | 17523164 | 17714357 | G1 | n   | ENSGACG000000013412 | -               | transposition, DNA-mediated, DNA binding, transposase activity                                                                                                                                                                                                                   |
| groupI   | 18889918 | 18920519 | G1 | bg  | -                   | -               | -                                                                                                                                                                                                                                                                                |
| groupI   | 21515129 | 21551132 | G1 | bg  | ENSGACG000000014268 | TNS1 (2 of 2)   | ATP binding, protein binding                                                                                                                                                                                                                                                     |
| groupI   | 21834818 | 21990705 | G1 | psL | ENSGACG000000014349 | CCDC28A         | -                                                                                                                                                                                                                                                                                |
| groupI   | 21834818 | 21990705 | G1 | psL | ENSGACG000000014353 | ECT2L           | protein binding                                                                                                                                                                                                                                                                  |
| groupI   | 21834818 | 21990705 | G1 | psL | ENSGACG000000014367 | -               | -                                                                                                                                                                                                                                                                                |

|         |          |          |    |     |                    |                  |                                                                                                                                                                                                                                                                                                                                                                                                                                                                                                                                                                                                                                                                                                                                                                                                                                                                                                            |
|---------|----------|----------|----|-----|--------------------|------------------|------------------------------------------------------------------------------------------------------------------------------------------------------------------------------------------------------------------------------------------------------------------------------------------------------------------------------------------------------------------------------------------------------------------------------------------------------------------------------------------------------------------------------------------------------------------------------------------------------------------------------------------------------------------------------------------------------------------------------------------------------------------------------------------------------------------------------------------------------------------------------------------------------------|
| groupI  | 21834818 | 21990705 | G1 | psL | ENSGACG00000014371 | -                | -                                                                                                                                                                                                                                                                                                                                                                                                                                                                                                                                                                                                                                                                                                                                                                                                                                                                                                          |
| groupI  | 21834818 | 21990705 | G1 | psL | ENSGACG00000014373 | COL8A1 (2 of 2)  | protein binding                                                                                                                                                                                                                                                                                                                                                                                                                                                                                                                                                                                                                                                                                                                                                                                                                                                                                            |
| groupI  | 21834818 | 21990705 | G1 | psL | ENSGACG00000014376 | JAGN1 (2 of 3)   | -                                                                                                                                                                                                                                                                                                                                                                                                                                                                                                                                                                                                                                                                                                                                                                                                                                                                                                          |
| groupI  | 21834818 | 21990705 | G1 | psL | ENSGACG00000014378 | -                | -                                                                                                                                                                                                                                                                                                                                                                                                                                                                                                                                                                                                                                                                                                                                                                                                                                                                                                          |
| groupI  | 21834818 | 21990705 | G1 | psL | ENSGACG00000014396 | TGDS             | cellular metabolic process, biosynthetic process, steroid biosynthetic process, extracellular polysaccharide biosynthetic process, catalytic activity, coenzyme binding, 3-beta-hydroxy-delta5-steroid dehydrogenase activity, dTDP-4-dehydrorhamnose reductase activity                                                                                                                                                                                                                                                                                                                                                                                                                                                                                                                                                                                                                                   |
| groupI  | 21834818 | 21990705 | G1 | psL | ENSGACG00000014388 | GPR180           | mitochondrial respiratory chain, electron carrier activity, cytochrome-c oxidase activity                                                                                                                                                                                                                                                                                                                                                                                                                                                                                                                                                                                                                                                                                                                                                                                                                  |
| groupI  | 21834818 | 21990705 | G1 | psL | ENSGACG00000014407 | -                | nucleic acid binding, ATP binding, helicase activity, ATP-dependent helicase activity                                                                                                                                                                                                                                                                                                                                                                                                                                                                                                                                                                                                                                                                                                                                                                                                                      |
| groupI  | 21834818 | 21990705 | G1 | psL | ENSGACG00000014358 | -                | -                                                                                                                                                                                                                                                                                                                                                                                                                                                                                                                                                                                                                                                                                                                                                                                                                                                                                                          |
| groupI  | 22066245 | 22094344 | G1 | -   | ENSGACG00000014437 | SATB2 (2 of 2)   | regulation of transcription, DNA-dependent, sequence-specific DNA binding transcription factor activity, DNA binding, sequence-specific DNA binding, protein binding                                                                                                                                                                                                                                                                                                                                                                                                                                                                                                                                                                                                                                                                                                                                       |
| groupI  | 22066245 | 22094344 | G1 | -   | ENSGACG00000014436 | -                | signal transduction, signal transducer activity                                                                                                                                                                                                                                                                                                                                                                                                                                                                                                                                                                                                                                                                                                                                                                                                                                                            |
| groupI  | 22733666 | 22761666 | G1 | n   | ENSGACG00000014770 | MAP2 (2 of 2)    | negative regulation of microtubule depolymerization                                                                                                                                                                                                                                                                                                                                                                                                                                                                                                                                                                                                                                                                                                                                                                                                                                                        |
| groupI  | 22993627 | 23008716 | G1 | -   | ENSGACG00000014850 | -                | DNA binding, protein binding                                                                                                                                                                                                                                                                                                                                                                                                                                                                                                                                                                                                                                                                                                                                                                                                                                                                               |
| groupI  | 24213196 | 24272852 | G1 | psL | ENSGACG00000015027 | SLITRK5 (1 of 2) | protein binding                                                                                                                                                                                                                                                                                                                                                                                                                                                                                                                                                                                                                                                                                                                                                                                                                                                                                            |
| groupI  | 24295693 | 24348146 | G1 | psL | -                  | -                | -                                                                                                                                                                                                                                                                                                                                                                                                                                                                                                                                                                                                                                                                                                                                                                                                                                                                                                          |
| groupII | 128991   | 151991   | G1 | n   | ENSGACG00000013938 | FAM108C1         | hydrolase activity                                                                                                                                                                                                                                                                                                                                                                                                                                                                                                                                                                                                                                                                                                                                                                                                                                                                                         |
| groupII | 4467143  | 4482464  | G1 | n   | -                  | -                | -                                                                                                                                                                                                                                                                                                                                                                                                                                                                                                                                                                                                                                                                                                                                                                                                                                                                                                          |
| groupII | 4555642  | 4581642  | G1 | psR | ENSGACG00000014734 | AP3S2            | transport, intracellular protein transport, vesicle-mediated transport, membrane coat                                                                                                                                                                                                                                                                                                                                                                                                                                                                                                                                                                                                                                                                                                                                                                                                                      |
| groupII | 4555642  | 4581642  | G1 | psR | ENSGACG00000014729 | IGF1R (1 of 2)   | protein phosphorylation, transmembrane receptor protein tyrosine kinase signaling pathway, embryonic camera-type eye development, germ cell migration, negative regulation of cysteine-type endopeptidase activity involved in apoptotic process, heart morphogenesis, spinal cord motor neuron differentiation, camera-type eye development, fin regeneration, semicircular canal morphogenesis, embryo development, heart development, insulin-like growth factor receptor signaling pathway, membrane, membrane fraction, ATP binding, protein kinase activity, protein binding, transferase activity, transferring phosphorus-containing groups, protein serine/threonine kinase activity, transmembrane receptor protein tyrosine kinase activity, protein tyrosine kinase activity, cysteine-type endopeptidase inhibitor activity involved in apoptotic process, insulin-like growth factor binding |
| groupII | 10378581 | 10411993 | G1 | n   | ENSGACG00000015714 | -                | signal transduction                                                                                                                                                                                                                                                                                                                                                                                                                                                                                                                                                                                                                                                                                                                                                                                                                                                                                        |
| groupII | 10378581 | 10411993 | G1 | n   | ENSGACG00000015715 | TEAD1 (1 of 2)   | regulation of transcription, DNA-dependent, nucleus, sequence-specific DNA binding transcription factor activity, protein binding, regulation of transcription, DNA-dependent, nucleus, sequence-specific DNA binding transcription factor activity, protein binding, regulation of transcription, DNA-dependent, nucleus, sequence-specific DNA binding transcription factor activity, protein binding, regulation of transcription, DNA-dependent, nucleus, sequence-specific DNA binding transcription factor activity, protein binding                                                                                                                                                                                                                                                                                                                                                                 |
| groupII | 10953879 | 10975048 | G1 | psL | -                  | -                | -                                                                                                                                                                                                                                                                                                                                                                                                                                                                                                                                                                                                                                                                                                                                                                                                                                                                                                          |
| groupII | 12206310 | 12220310 | G1 | psL | -                  | -                | -                                                                                                                                                                                                                                                                                                                                                                                                                                                                                                                                                                                                                                                                                                                                                                                                                                                                                                          |
| groupII | 12873820 | 12899820 | G1 | psR | ENSGACG00000016032 | ELP4             | regulation of transcription from RNA polymerase II promoter, Elongator holoenzyme complex                                                                                                                                                                                                                                                                                                                                                                                                                                                                                                                                                                                                                                                                                                                                                                                                                  |
| groupII | 13605684 | 13659144 | G1 | n   | ENSGACG00000016144 | PDCCD2           | cytoplasm, zinc ion binding                                                                                                                                                                                                                                                                                                                                                                                                                                                                                                                                                                                                                                                                                                                                                                                                                                                                                |
| groupII | 13605684 | 13659144 | G1 | n   | ENSGACG00000016147 | TBP              | regulation of transcription, DNA-dependent, transcription initiation from RNA polymerase II promoter, gastrulation, mRNA catabolic process, transcription from RNA polymerase II promoter, DNA binding                                                                                                                                                                                                                                                                                                                                                                                                                                                                                                                                                                                                                                                                                                     |
| groupII | 13605684 | 13659144 | G1 | n   | ENSGACG00000016151 | PSMB1            | proteolysis involved in cellular protein catabolic process, proteasome core complex, endopeptidase activity, threonine-type endopeptidase activity                                                                                                                                                                                                                                                                                                                                                                                                                                                                                                                                                                                                                                                                                                                                                         |
| groupII | 13605684 | 13659144 | G1 | n   | ENSGACG00000016158 | PHF10            | zinc ion binding, protein binding                                                                                                                                                                                                                                                                                                                                                                                                                                                                                                                                                                                                                                                                                                                                                                                                                                                                          |
| groupII | 13605684 | 13659144 | G1 | n   | ENSGACG00000016166 | CCSAP (1 of 2)   | -                                                                                                                                                                                                                                                                                                                                                                                                                                                                                                                                                                                                                                                                                                                                                                                                                                                                                                          |
| groupII | 13605684 | 13659144 | G1 | n   | ENSGACG00000016168 | ACTC1 (3 of 3)   | ATP binding                                                                                                                                                                                                                                                                                                                                                                                                                                                                                                                                                                                                                                                                                                                                                                                                                                                                                                |
| groupII | 13605684 | 13659144 | G1 | n   | ENSGACG00000016174 | -                | -                                                                                                                                                                                                                                                                                                                                                                                                                                                                                                                                                                                                                                                                                                                                                                                                                                                                                                          |
| groupII | 13605684 | 13659144 | G1 | n   | ENSGACG00000016176 | ABCB10           | transport, transmembrane transport, integral to membrane, ATP binding, nucleotide binding, ATPase activity, ATPase activity, coupled to transmembrane movement of substances, nucleoside-triphosphatase activity                                                                                                                                                                                                                                                                                                                                                                                                                                                                                                                                                                                                                                                                                           |
| groupII | 13605684 | 13659144 | G1 | n   | ENSGACG00000016150 | PSMC3            | protein catabolic process, cytoplasm, ATP binding, hydrolase activity, nucleotide binding, nucleoside-triphosphatase activity, protein catabolic process, cytoplasm, ATP binding, hydrolase activity, nucleotide binding, nucleoside-triphosphatase activity                                                                                                                                                                                                                                                                                                                                                                                                                                                                                                                                                                                                                                               |

|          |          |          |    |     |                    |                 |                                                                                                                                                                                                                                                                                                                                                                                    |
|----------|----------|----------|----|-----|--------------------|-----------------|------------------------------------------------------------------------------------------------------------------------------------------------------------------------------------------------------------------------------------------------------------------------------------------------------------------------------------------------------------------------------------|
| groupII  | 13605684 | 13659144 | G1 | n   | ENSGACG00000016179 | URB2            | -                                                                                                                                                                                                                                                                                                                                                                                  |
| groupII  | 13605684 | 13659144 | G1 | n   | ENSGACG00000016164 | RAB4A           | signal transduction, GTP catabolic process, small GTPase mediated signal transduction, intracellular protein transport, nucleocytoplasmic transport, protein transport, intracellular, GTPase activity, GTP binding                                                                                                                                                                |
| groupII  | 15718790 | 15774714 | G1 | psR | -                  | -               | -                                                                                                                                                                                                                                                                                                                                                                                  |
| groupII  | 15776058 | 15813058 | G1 | psR | ENSGACG00000016527 | UNC13C          | intracellular signal transduction, protein binding                                                                                                                                                                                                                                                                                                                                 |
| groupII  | 15813680 | 15907422 | G1 | psR | ENSGACG00000016534 | IGDCC4          | protein binding                                                                                                                                                                                                                                                                                                                                                                    |
| groupII  | 15813680 | 15907422 | G1 | psR | ENSGACG00000016527 | UNC13C          | intracellular signal transduction, protein binding                                                                                                                                                                                                                                                                                                                                 |
| groupII  | 15988433 | 16031218 | G1 | n   | -                  | -               | -                                                                                                                                                                                                                                                                                                                                                                                  |
| groupII  | 16582378 | 16602378 | G1 | n   | -                  | -               | -                                                                                                                                                                                                                                                                                                                                                                                  |
| groupII  | 17020603 | 17038118 | G1 | psR | -                  | -               | -                                                                                                                                                                                                                                                                                                                                                                                  |
| groupII  | 17504888 | 17535302 | G1 | psR | -                  | -               | -                                                                                                                                                                                                                                                                                                                                                                                  |
| groupII  | 22858549 | 22873642 | G1 | psL | ENSGACG00000017613 | PPFIA1          | nucleotide binding, protein binding                                                                                                                                                                                                                                                                                                                                                |
| groupIII | 1247036  | 1285242  | G1 | psL | ENSGACG00000013375 | -               | regulation of transcription, DNA-dependent, intracellular signal transduction, phosphorylation, metabolic process, nucleus, DNA binding, zinc ion binding, kinase activity, protein binding, phosphotransferase activity, carboxyl group as acceptor                                                                                                                               |
| groupIII | 10209637 | 10288125 | G1 | psR | ENSGACG00000022152 | -               | -                                                                                                                                                                                                                                                                                                                                                                                  |
| groupIII | 10209637 | 10288125 | G1 | psR | ENSGACG00000022153 | -               | -                                                                                                                                                                                                                                                                                                                                                                                  |
| groupIII | 10209637 | 10288125 | G1 | psR | ENSGACG00000016392 | WAC (2 of 2)    | protein binding                                                                                                                                                                                                                                                                                                                                                                    |
| groupIII | 10209637 | 10288125 | G1 | psR | ENSGACG00000016391 | -               | G-protein coupled receptor signaling pathway, visual perception, integral to membrane, G-protein coupled receptor signaling pathway, visual perception, integral to membrane                                                                                                                                                                                                       |
| groupIII | 10209637 | 10288125 | G1 | psR | ENSGACG00000016393 | MPP7 (2 of 2)   | protein binding                                                                                                                                                                                                                                                                                                                                                                    |
| groupIII | 10298112 | 10326112 | G1 | -   | ENSGACG00000016395 | RAB18           | regulation of transcription, DNA-dependent, signal transduction, GTP catabolic process, small GTPase mediated signal transduction, intracellular protein transport, nucleocytoplasmic transport, protein transport, intracellular, ATP binding, GTPase activity, GTP binding, transcription factor binding                                                                         |
| groupIII | 10298112 | 10326112 | G1 | -   | ENSGACG00000016401 | ACBD5 (2 of 2)  | fatty-acyl-CoA binding                                                                                                                                                                                                                                                                                                                                                             |
| groupIII | 10298112 | 10326112 | G1 | -   | ENSGACG00000016393 | MPP7 (2 of 2)   | protein binding                                                                                                                                                                                                                                                                                                                                                                    |
| groupIII | 10298112 | 10326112 | G1 | -   | ENSGACG00000016397 | YME1L1          | proteolysis, protein catabolic process, membrane, ATP binding, metalloendopeptidase activity, nucleotide binding, nucleoside-triphosphatase activity                                                                                                                                                                                                                               |
| groupIII | 10423311 | 10498345 | G1 | psR | ENSGACG00000016454 | DUSP22 (1 of 2) | protein dephosphorylation, dephosphorylation, protein tyrosine/serine/threonine phosphatase activity, phosphatase activity, protein dephosphorylation, dephosphorylation, protein tyrosine/serine/threonine phosphatase activity, phosphatase activity                                                                                                                             |
| groupIII | 10423311 | 10498345 | G1 | psR | ENSGACG00000016461 | IRF4 (1 of 2)   | regulation of transcription, DNA-dependent, proteolysis, sequence-specific DNA binding transcription factor activity, zinc ion binding, protein binding, metalloprotease activity                                                                                                                                                                                                  |
| groupIII | 10423311 | 10498345 | G1 | psR | ENSGACG00000016466 | -               | regulation of transcription, DNA-dependent, sequence-specific DNA binding transcription factor activity, sequence-specific DNA binding                                                                                                                                                                                                                                             |
| groupIII | 10423311 | 10498345 | G1 | psR | ENSGACG00000016435 | DIS3L2          | RNA binding, ribonuclease activity                                                                                                                                                                                                                                                                                                                                                 |
| groupIII | 10423311 | 10498345 | G1 | psR | ENSGACG00000016439 | -               | myosin complex, cytoskeleton, motor activity, ATP binding, protein binding                                                                                                                                                                                                                                                                                                         |
| groupIII | 10423311 | 10498345 | G1 | psR | ENSGACG00000016450 | TLK1 (1 of 2)   | protein phosphorylation, ATP binding, protein kinase activity, transferase activity, transferring phosphorus-containing groups, protein serine/threonine kinase activity                                                                                                                                                                                                           |
| groupIII | 13969743 | 14046770 | G1 | psL | ENSGACG00000017433 | WNT3A           | multicellular organismal development, Wnt receptor signaling pathway, calcium modulating pathway, mesoderm development, tail morphogenesis, convergent extension, midbrain-hindbrain boundary development, anterior/posterior pattern specification, embryonic pattern specification, notochord development, dorsal/ventral pattern formation, somitogenesis, extracellular region |
| groupIII | 13969743 | 14046770 | G1 | psL | ENSGACG00000017437 | -               | small GTPase mediated signal transduction, intracellular protein transport, protein transport, intracellular, GTP binding                                                                                                                                                                                                                                                          |
| groupIII | 13969743 | 14046770 | G1 | psL | ENSGACG00000017446 | GUK1 (1 of 2)   | nucleotide binding, protein binding, nucleoside-triphosphatase activity                                                                                                                                                                                                                                                                                                            |
| groupIII | 13969743 | 14046770 | G1 | psL | ENSGACG00000017431 | WNT9A           | multicellular organismal development, Wnt receptor signaling pathway, calcium modulating pathway, extracellular region                                                                                                                                                                                                                                                             |
| groupIII | 13969743 | 14046770 | G1 | psL | ENSGACG00000017444 | C1orf35         | -                                                                                                                                                                                                                                                                                                                                                                                  |
| groupIII | 14049659 | 14059659 | G1 | psL | ENSGACG00000017451 | -               | regulation of Rho protein signal transduction, intracellular, protein binding, Rho guanyl-nucleotide exchange factor activity                                                                                                                                                                                                                                                      |
| groupIII | 15994292 | 16037292 | G1 | psL | ENSGACG00000017792 | -               | zinc ion binding, protein binding                                                                                                                                                                                                                                                                                                                                                  |
| groupIII | 15994292 | 16037292 | G1 | psL | ENSGACG00000017799 | METTL17         | -                                                                                                                                                                                                                                                                                                                                                                                  |
| groupIII | 15994292 | 16037292 | G1 | psL | ENSGACG00000017811 | SDR39U1         | cellular metabolic process, catalytic activity, coenzyme binding                                                                                                                                                                                                                                                                                                                   |

|          |          |          |    |     |                    |          |                                                                                                                                                                                                                                                                                                                                                                                                                                                                                                                                                                                                                                       |
|----------|----------|----------|----|-----|--------------------|----------|---------------------------------------------------------------------------------------------------------------------------------------------------------------------------------------------------------------------------------------------------------------------------------------------------------------------------------------------------------------------------------------------------------------------------------------------------------------------------------------------------------------------------------------------------------------------------------------------------------------------------------------|
| groupIII | 15994292 | 16037292 | G1 | psL | ENSGACG00000022748 | -        | -                                                                                                                                                                                                                                                                                                                                                                                                                                                                                                                                                                                                                                     |
| groupIII | 15994292 | 16037292 | G1 | psL | ENSGACG00000017812 | -        | G-protein coupled receptor signaling pathway, integral to membrane                                                                                                                                                                                                                                                                                                                                                                                                                                                                                                                                                                    |
| groupIII | 15994292 | 16037292 | G1 | psL | ENSGACG00000017794 | PARP2    | protein ADP-ribosylation, NAD+ ADP-ribosyltransferase activity                                                                                                                                                                                                                                                                                                                                                                                                                                                                                                                                                                        |
| groupIV  | 4684075  | 4718076  | G1 | psR | ENSGACG00000016859 | -        | -                                                                                                                                                                                                                                                                                                                                                                                                                                                                                                                                                                                                                                     |
| groupIV  | 4684075  | 4718076  | G1 | psR | ENSGACG00000016856 | SLC25A48 | -                                                                                                                                                                                                                                                                                                                                                                                                                                                                                                                                                                                                                                     |
| groupIV  | 5049876  | 5067960  | G1 | -   | ENSGACG00000016919 | -        | -                                                                                                                                                                                                                                                                                                                                                                                                                                                                                                                                                                                                                                     |
| groupIV  | 5049876  | 5067960  | G1 | -   | ENSGACG00000016915 | CCDC88B  | -                                                                                                                                                                                                                                                                                                                                                                                                                                                                                                                                                                                                                                     |
| groupIV  | 6349406  | 6380507  | G1 | n   | ENSGACG00000017312 | CENPI    | -                                                                                                                                                                                                                                                                                                                                                                                                                                                                                                                                                                                                                                     |
| groupIV  | 6349406  | 6380507  | G1 | n   | ENSGACG00000017316 | TMEM35   | -                                                                                                                                                                                                                                                                                                                                                                                                                                                                                                                                                                                                                                     |
| groupIV  | 6349406  | 6380507  | G1 | n   | ENSGACG00000017318 | ARL13A   | small GTPase mediated signal transduction, intracellular protein transport, intracellular, GTP binding                                                                                                                                                                                                                                                                                                                                                                                                                                                                                                                                |
| groupIV  | 6382530  | 6415530  | G1 | psR | ENSGACG00000017320 | XKR3     | -                                                                                                                                                                                                                                                                                                                                                                                                                                                                                                                                                                                                                                     |
| groupIV  | 6382530  | 6415530  | G1 | psR | ENSGACG00000017326 | -        | nucleic acid binding                                                                                                                                                                                                                                                                                                                                                                                                                                                                                                                                                                                                                  |
| groupIV  | 6382530  | 6415530  | G1 | psR | ENSGACG00000017324 | NOX1     | oxidation-reduction process, integral to membrane, iron ion binding, electron carrier activity, oxidoreductase activity, flavin adenine dinucleotide binding                                                                                                                                                                                                                                                                                                                                                                                                                                                                          |
| groupIV  | 6533013  | 6584013  | G1 | psL | -                  | -        | -                                                                                                                                                                                                                                                                                                                                                                                                                                                                                                                                                                                                                                     |
| groupIV  | 6790495  | 6926506  | G1 | psL | ENSGACG00000017467 | PCDH19   | cell adhesion, homophilic cell adhesion, neural tube formation, brain morphogenesis, membrane, plasma membrane, calcium ion binding                                                                                                                                                                                                                                                                                                                                                                                                                                                                                                   |
| groupIV  | 7036370  | 7111370  | G1 | psL | -                  | -        | -                                                                                                                                                                                                                                                                                                                                                                                                                                                                                                                                                                                                                                     |
| groupIV  | 7132127  | 7215851  | G1 | psL | -                  | -        | -                                                                                                                                                                                                                                                                                                                                                                                                                                                                                                                                                                                                                                     |
| groupIV  | 7240201  | 7332718  | G1 | psL | -                  | -        | -                                                                                                                                                                                                                                                                                                                                                                                                                                                                                                                                                                                                                                     |
| groupIV  | 7965141  | 8026141  | G1 | psL | ENSGACG00000017530 | BEND4    | -                                                                                                                                                                                                                                                                                                                                                                                                                                                                                                                                                                                                                                     |
| groupIV  | 7965141  | 8026141  | G1 | psL | ENSGACG00000017532 | ATP8A1   | ATP biosynthetic process, phospholipid transport, membrane, integral to membrane, magnesium ion binding, ATP binding, metal ion binding, nucleotide binding, ATPase activity, coupled to transmembrane movement of ions, phosphorylative mechanism, phospholipid-translocating ATPase activity, metabolic process, ATP biosynthetic process, phospholipid transport, membrane, integral to membrane, magnesium ion binding, ATP binding, metal ion binding, catalytic activity, nucleotide binding, ATPase activity, coupled to transmembrane movement of ions, phosphorylative mechanism, phospholipid-translocating ATPase activity |
| groupIV  | 11923526 | 11974526 | G1 | n   | ENSGACG00000018213 | -        | protein binding                                                                                                                                                                                                                                                                                                                                                                                                                                                                                                                                                                                                                       |
| groupIV  | 11923526 | 11974526 | G1 | n   | ENSGACG00000018221 | FGF16    | pectoral fin morphogenesis, cell proliferation, growth factor activity                                                                                                                                                                                                                                                                                                                                                                                                                                                                                                                                                                |
| groupIV  | 11923526 | 11974526 | G1 | n   | ENSGACG00000018218 | ATRX     | nucleic acid binding, DNA binding, zinc ion binding, ATP binding, protein binding, helicase activity                                                                                                                                                                                                                                                                                                                                                                                                                                                                                                                                  |
| groupIV  | 11923526 | 11974526 | G1 | n   | ENSGACG00000018214 | KIF3A    | microtubule-based movement, ATP binding, microtubule motor activity                                                                                                                                                                                                                                                                                                                                                                                                                                                                                                                                                                   |
| groupIV  | 13323370 | 13348370 | G1 | bg  | ENSGACG00000018357 | RMND5B   | protein binding, protein binding, protein binding                                                                                                                                                                                                                                                                                                                                                                                                                                                                                                                                                                                     |
| groupIV  | 13323370 | 13348370 | G1 | bg  | ENSGACG00000018359 | N4BP3    | -                                                                                                                                                                                                                                                                                                                                                                                                                                                                                                                                                                                                                                     |
| groupIV  | 14849033 | 14898784 | G1 | psR | ENSGACG00000018493 | ODZ2     | signal transduction, integral to membrane, calcium ion binding, protein binding, 2 iron, 2 sulfur cluster binding                                                                                                                                                                                                                                                                                                                                                                                                                                                                                                                     |
| groupIV  | 15334868 | 15370269 | G1 | n   | -                  | -        | -                                                                                                                                                                                                                                                                                                                                                                                                                                                                                                                                                                                                                                     |
| groupIV  | 19462375 | 19613598 | G1 | n   | ENSGACG00000018926 | LRRN3    | protein binding                                                                                                                                                                                                                                                                                                                                                                                                                                                                                                                                                                                                                       |
| groupIV  | 19462375 | 19613598 | G1 | n   | ENSGACG00000018927 | -        | -                                                                                                                                                                                                                                                                                                                                                                                                                                                                                                                                                                                                                                     |
| groupIV  | 29778012 | 29792502 | G1 | psL | ENSGACG00000019748 | -        | neurotransmitter transport, integral to membrane, neurotransmitter:sodium symporter activity                                                                                                                                                                                                                                                                                                                                                                                                                                                                                                                                          |
| groupIV  | 29778012 | 29792502 | G1 | psL | ENSGACG00000019755 | PARP11   | zinc ion binding, NAD+ ADP-ribosyltransferase activity, NAD+ ADP-ribosyltransferase activity                                                                                                                                                                                                                                                                                                                                                                                                                                                                                                                                          |
| groupIX  | 8897892  | 8922393  | G1 | psR | ENSGACG00000017906 | BDH2     | metabolic process, heme metabolic process, oxidoreductase activity                                                                                                                                                                                                                                                                                                                                                                                                                                                                                                                                                                    |
| groupIX  | 8897892  | 8922393  | G1 | psR | ENSGACG00000017930 | CISD2    | intracellular membrane-bounded organelle, 2 iron, 2 sulfur cluster binding                                                                                                                                                                                                                                                                                                                                                                                                                                                                                                                                                            |
| groupIX  | 8897892  | 8922393  | G1 | psR | ENSGACG00000017922 | -        | transmembrane transport, cation transport, integral to membrane, solute:hydrogen antiporter activity                                                                                                                                                                                                                                                                                                                                                                                                                                                                                                                                  |
| groupIX  | 9205568  | 9242568  | G1 | bg  | ENSGACG00000017992 | LRRTM1   | lipid catabolic process, phospholipid metabolic process, protein binding, phospholipase A2 activity, identical protein binding                                                                                                                                                                                                                                                                                                                                                                                                                                                                                                        |
| groupIX  | 9205568  | 9242568  | G1 | bg  | ENSGACG00000017985 | CTNNA2   | cell adhesion, actin cytoskeleton, structural molecule activity                                                                                                                                                                                                                                                                                                                                                                                                                                                                                                                                                                       |
| groupIX  | 9244744  | 9275749  | G1 | bg  | ENSGACG00000017985 | CTNNA2   | cell adhesion, actin cytoskeleton, structural molecule activity                                                                                                                                                                                                                                                                                                                                                                                                                                                                                                                                                                       |
| groupIX  | 9587254  | 9620254  | G1 | psL | ENSGACG00000018024 | UGT8     | metabolic process, transferase activity, transferring hexosyl groups                                                                                                                                                                                                                                                                                                                                                                                                                                                                                                                                                                  |
| groupIX  | 10156078 | 10176078 | G1 | bg  | ENSGACG00000018157 | -        | -                                                                                                                                                                                                                                                                                                                                                                                                                                                                                                                                                                                                                                     |
| groupIX  | 10156078 | 10176078 | G1 | bg  | ENSGACG00000018158 | -        | -                                                                                                                                                                                                                                                                                                                                                                                                                                                                                                                                                                                                                                     |
| groupIX  | 10156078 | 10176078 | G1 | bg  | ENSGACG00000018155 | SCRN2    | proteolysis, dipeptidase activity                                                                                                                                                                                                                                                                                                                                                                                                                                                                                                                                                                                                     |



|          |          |          |    |     |                     |                   |                                                                                                                                                                                                                                                                                                                                      |
|----------|----------|----------|----|-----|---------------------|-------------------|--------------------------------------------------------------------------------------------------------------------------------------------------------------------------------------------------------------------------------------------------------------------------------------------------------------------------------------|
| groupIX  | 10156078 | 10176078 | G1 | bg  | ENSGACG00000018160  | PLA2G12B (1 of 2) | lipid catabolic process, extracellular region, calcium ion binding, phospholipase A2 activity                                                                                                                                                                                                                                        |
| groupIX  | 11669840 | 11704840 | G1 | psL | ENSGACG00000018409  | PCDH10 (2 of 2)   | cell adhesion, homophilic cell adhesion, membrane, plasma membrane, calcium ion binding                                                                                                                                                                                                                                              |
| groupIX  | 15069624 | 15100057 | G1 | bg  | ENSGACG00000018992  | SLC25A41          | calcium ion binding, protein binding, calcium ion binding, protein binding                                                                                                                                                                                                                                                           |
| groupIX  | 15069624 | 15100057 | G1 | bg  | ENSGACG00000018994  | C19orf53          | -                                                                                                                                                                                                                                                                                                                                    |
| groupIX  | 15069624 | 15100057 | G1 | bg  | ENSGACG00000018995  | MRI1              | cellular metabolic process, cellular biosynthetic process                                                                                                                                                                                                                                                                            |
| groupIX  | 15069624 | 15100057 | G1 | bg  | ENSGACG00000018993  | -                 | signal transducer activity                                                                                                                                                                                                                                                                                                           |
| groupIX  | 15069624 | 15100057 | G1 | bg  | ENSGACG00000018990  | KHSRP (2 of 2)    | RNA binding                                                                                                                                                                                                                                                                                                                          |
| groupIX  | 15978682 | 15990982 | G1 | psR | -                   | -                 | -                                                                                                                                                                                                                                                                                                                                    |
| groupIX  | 16262740 | 16281175 | G1 | psR | -                   | -                 | -                                                                                                                                                                                                                                                                                                                                    |
| groupIX  | 16367732 | 16400245 | G1 | bg  | ENSGACG00000019296  | SLC25A38 (1 of 2) | -                                                                                                                                                                                                                                                                                                                                    |
| groupIX  | 16367732 | 16400245 | G1 | bg  | ENSGACG00000019298  | MYH9 (2 of 2)     | signal transduction, intracellular, myosin complex, motor activity, ATP binding, nucleotide binding, protein binding                                                                                                                                                                                                                 |
| groupIX  | 17088031 | 17147293 | G1 | n   | ENSGACG00000019394  | HN1 (1 of 2)      | -                                                                                                                                                                                                                                                                                                                                    |
| groupIX  | 17088031 | 17147293 | G1 | n   | ENSGACG00000019395  | -                 | protein binding                                                                                                                                                                                                                                                                                                                      |
| groupIX  | 17088031 | 17147293 | G1 | n   | ENSGACG00000019397  | SEPT9 (1 of 2)    | cell cycle, GTP binding, cell cycle, GTP binding                                                                                                                                                                                                                                                                                     |
| groupIX  | 20142746 | 20249479 | G1 | psR | ENSGACG00000020000  | -                 | G-protein coupled receptor signaling pathway, integral to membrane                                                                                                                                                                                                                                                                   |
| groupIX  | 20142746 | 20249479 | G1 | psR | ENSGACG00000020004  | EIF4A3            | nucleic acid binding, ATP binding, helicase activity, ATP-dependent helicase activity, nucleic acid binding, ATP binding, helicase activity, ATP-dependent helicase activity                                                                                                                                                         |
| groupIX  | 20142746 | 20249479 | G1 | psR | ENSGACG00000020011  | -                 | -                                                                                                                                                                                                                                                                                                                                    |
| groupIX  | 20142746 | 20249479 | G1 | psR | ENSGACG00000020013  | -                 | -                                                                                                                                                                                                                                                                                                                                    |
| groupIX  | 20142746 | 20249479 | G1 | psR | ENSGACG00000020020  | RTN3 (2 of 2)     | endoplasmic reticulum                                                                                                                                                                                                                                                                                                                |
| groupIX  | 20142746 | 20249479 | G1 | psR | ENSGACG00000019998  | -                 | protein binding                                                                                                                                                                                                                                                                                                                      |
| groupIX  | 20142746 | 20249479 | G1 | psR | ENSGACG00000020002  | SRF (2 of 2)      | regulation of transcription, DNA-dependent, transport, transmembrane transport, nucleus, membrane, sequence-specific DNA binding transcription factor activity, sequence-specific DNA binding, transporter activity                                                                                                                  |
| groupIX  | 20142746 | 20249479 | G1 | psR | ENSGACG00000020010  | TMEM178           | -                                                                                                                                                                                                                                                                                                                                    |
| groupIX  | 20142746 | 20249479 | G1 | psR | ENSGACG00000020014  | SOS1              | small GTPase mediated signal transduction, nucleosome assembly, regulation of Rho protein signal transduction, regulation of small GTPase mediated signal transduction, nucleus, intracellular, nucleosome, DNA binding, protein binding, Rho guanyl-nucleotide exchange factor activity, guanyl-nucleotide exchange factor activity |
| groupIX  | 20142746 | 20249479 | G1 | psR | ENSGACG00000020021  | SLC29A1 (2 of 2)  | transport, membrane, nucleoside transmembrane transporter activity                                                                                                                                                                                                                                                                   |
| groupV   | 170324   | 205428   | G1 | psL | ENSGACG00000002142  | VCL (1 of 2)      | oxidation-reduction process, metabolic process, cell adhesion, actin cytoskeleton, oxidoreductase activity, structural molecule activity, oxidation-reduction process, metabolic process, cell adhesion, actin cytoskeleton, oxidoreductase activity, structural molecule activity                                                   |
| groupV   | 170324   | 205428   | G1 | psL | ENSGACG00000002159  | ADK (1 of 2)      | phosphotransferase activity, alcohol group as acceptor                                                                                                                                                                                                                                                                               |
| groupVI  | 8963799  | 9006874  | G1 | bg  | ENSGACG00000007680  | -                 | intracellular, nucleic acid binding, zinc ion binding                                                                                                                                                                                                                                                                                |
| groupVII | 4987977  | 5022432  | G1 | n   | ENSGACG00000019483  | -                 | -                                                                                                                                                                                                                                                                                                                                    |
| groupVII | 11953874 | 11981874 | G1 | bg  | ENSGACG000000020129 | -                 | protein binding, phosphotransferase activity, alcohol group as acceptor                                                                                                                                                                                                                                                              |
| groupVII | 14113228 | 14222384 | G1 | bg  | ENSGACG000000020215 | RPS6KB1 (2 of 2)  | protein phosphorylation, ATP binding, protein kinase activity, transferase activity, transferring phosphorus-containing groups, protein serine/threonine kinase activity                                                                                                                                                             |
| groupVII | 14113228 | 14222384 | G1 | bg  | ENSGACG000000021252 | -                 | -                                                                                                                                                                                                                                                                                                                                    |
| groupVII | 14113228 | 14222384 | G1 | bg  | ENSGACG000000020216 | CLTC              | intracellular protein transport, vesicle-mediated transport, clathrin coat of trans-Golgi network vesicle, clathrin coat of coated pit, binding, structural molecule activity                                                                                                                                                        |
| groupVII | 15294113 | 15334264 | G1 | psR | ENSGACG000000020271 | -                 | -                                                                                                                                                                                                                                                                                                                                    |
| groupVII | 15439142 | 15479767 | G1 | -   | ENSGACG000000020278 | FRMD8             | cytoskeleton, cytoskeleton                                                                                                                                                                                                                                                                                                           |
| groupVII | 15439142 | 15479767 | G1 | -   | ENSGACG000000020280 | TM7SF2            | membrane                                                                                                                                                                                                                                                                                                                             |
| groupVII | 15439142 | 15479767 | G1 | -   | ENSGACG000000020281 | CNIH2             | intracellular signal transduction, membrane                                                                                                                                                                                                                                                                                          |
| groupVII | 15439142 | 15479767 | G1 | -   | ENSGACG000000020279 | C11orf2           | lipid digestion, regulation of phospholipase activity, Golgi organization, Golgi vesicle transport, ADP-ribosylation factor binding                                                                                                                                                                                                  |
| groupVII | 16682312 | 16715040 | G1 | n   | ENSGACG000000020313 | PCDH1 (2 of 2)    | cell adhesion, homophilic cell adhesion, membrane, plasma membrane, calcium ion binding                                                                                                                                                                                                                                              |
| groupVII | 17976959 | 18007943 | G1 | psL | ENSGACG000000020399 | -                 | protein binding, insulin receptor binding                                                                                                                                                                                                                                                                                            |
| groupVII | 17976959 | 18007943 | G1 | psL | ENSGACG000000020400 | SLC25A2           | -                                                                                                                                                                                                                                                                                                                                    |
| groupVII | 17976959 | 18007943 | G1 | psL | ENSGACG000000020401 | -                 | integral to membrane, integral to membrane, integral to membrane                                                                                                                                                                                                                                                                     |

|           |          |          |    |     |                     |                  |                                                                                                                                                                                                                                                                                                                                                                                                                                                                                                                          |
|-----------|----------|----------|----|-----|---------------------|------------------|--------------------------------------------------------------------------------------------------------------------------------------------------------------------------------------------------------------------------------------------------------------------------------------------------------------------------------------------------------------------------------------------------------------------------------------------------------------------------------------------------------------------------|
| groupVII  | 17976959 | 18007943 | G1 | psL | ENSGACG00000020402  | MPDU1 (2 of 2)   | -                                                                                                                                                                                                                                                                                                                                                                                                                                                                                                                        |
| groupVII  | 17976959 | 18007943 | G1 | psL | ENSGACG00000020403  | -                | -                                                                                                                                                                                                                                                                                                                                                                                                                                                                                                                        |
| groupVII  | 18179385 | 18201385 | G1 | n   | ENSGACG00000020415  | -                | protein binding                                                                                                                                                                                                                                                                                                                                                                                                                                                                                                          |
| groupVII  | 18616006 | 18658006 | G1 | n   | ENSGACG00000020442  | CD248 (2 of 2)   | binding                                                                                                                                                                                                                                                                                                                                                                                                                                                                                                                  |
| groupVII  | 18616006 | 18658006 | G1 | n   | ENSGACG00000020443  | RCE1 (2 of 2)    | membrane                                                                                                                                                                                                                                                                                                                                                                                                                                                                                                                 |
| groupVII  | 18616006 | 18658006 | G1 | n   | ENSGACG00000020441  | DPP3             | proteolysis, cytoplasm, dipeptidyl-peptidase activity                                                                                                                                                                                                                                                                                                                                                                                                                                                                    |
| groupVII  | 18616006 | 18658006 | G1 | n   | ENSGACG00000020444  | EHBP1L1 (2 of 2) | protein binding,                                                                                                                                                                                                                                                                                                                                                                                                                                                                                                         |
| groupVII  | 18698437 | 18721437 | G1 | psL | ENSGACG00000020450  | -                | growth factor activity                                                                                                                                                                                                                                                                                                                                                                                                                                                                                                   |
| groupVII  | 18698437 | 18721437 | G1 | psL | ENSGACG00000020451  | AFAP1L1 (2 of 2) | protein binding                                                                                                                                                                                                                                                                                                                                                                                                                                                                                                          |
| groupVII  | 20176019 | 20199325 | G1 | n   | ENSGACG00000020560  | DCLK1 (1 of 2)   | intracellular signal transduction, protein phosphorylation, ATP binding, protein kinase activity, transferase activity, transferring phosphorus-containing groups, protein serine/threonine kinase activity, intracellular signal transduction                                                                                                                                                                                                                                                                           |
| groupVII  | 21105246 | 21151246 | G1 | n   | -                   | -                | -                                                                                                                                                                                                                                                                                                                                                                                                                                                                                                                        |
| groupVII  | 24399560 | 24475560 | G1 | n   | ENSGACG00000020773  | NCAM1 (1 of 2)   | protein binding                                                                                                                                                                                                                                                                                                                                                                                                                                                                                                          |
| groupVIII | 11988622 | 12024622 | G1 | psR | ENSGACG00000009483  | NEGR1            | protein binding, identical protein binding                                                                                                                                                                                                                                                                                                                                                                                                                                                                               |
| groupX    | 6160301  | 6172301  | G1 | n   | -                   | -                | -                                                                                                                                                                                                                                                                                                                                                                                                                                                                                                                        |
| groupX    | 6517945  | 6547101  | G1 | n   | ENSGACG00000004206  | MRPL24           | translation, intracellular, ribosome, structural constituent of ribosome                                                                                                                                                                                                                                                                                                                                                                                                                                                 |
| groupX    | 6517945  | 6547101  | G1 | n   | ENSGACG00000004219  | BCAN (2 of 2)    | cell adhesion, calcium ion binding, binding, protein binding, hyaluronic acid binding                                                                                                                                                                                                                                                                                                                                                                                                                                    |
| groupX    | 8434880  | 8457880  | G1 | n   | ENSGACG00000005894  | -                | -                                                                                                                                                                                                                                                                                                                                                                                                                                                                                                                        |
| groupX    | 8867907  | 8913211  | G1 | psR | ENSGACG00000006256  | GNGT1            | G-protein coupled receptor signaling pathway, heterotrimeric G-protein complex, signal transducer activity                                                                                                                                                                                                                                                                                                                                                                                                               |
| groupX    | 8867907  | 8913211  | G1 | psR | ENSGACG000000022270 | -                | -                                                                                                                                                                                                                                                                                                                                                                                                                                                                                                                        |
| groupX    | 8867907  | 8913211  | G1 | psR | ENSGACG00000006126  | -                | oxidation-reduction process, metabolic process, oxidoreductase activity, acting on the CH-CH group of donors, acyl-CoA dehydrogenase activity                                                                                                                                                                                                                                                                                                                                                                            |
| groupX    | 8867907  | 8913211  | G1 | psR | ENSGACG00000006264  | TFPI2            | serine-type endopeptidase inhibitor activity, serine-type endopeptidase inhibitor activity                                                                                                                                                                                                                                                                                                                                                                                                                               |
| groupX    | 8867907  | 8913211  | G1 | psR | ENSGACG00000006273  | CALCR            | G-protein coupled receptor signaling pathway, cell surface receptor signaling pathway, methylation, membrane, integral to membrane, G-protein coupled receptor activity, nucleic acid binding, transmembrane signaling receptor activity, methyltransferase activity                                                                                                                                                                                                                                                     |
| groupX    | 9542057  | 9560057  | G1 | n   | ENSGACG00000006878  | TRA2A            | nucleic acid binding, nucleic acid binding,                                                                                                                                                                                                                                                                                                                                                                                                                                                                              |
| groupX    | 9542057  | 9560057  | G1 | n   | ENSGACG00000006894  | IGF2BP3          | nucleic acid binding, RNA binding                                                                                                                                                                                                                                                                                                                                                                                                                                                                                        |
| groupX    | 9719209  | 9768476  | G1 | n   | ENSGACG00000007010  | OXNAD1           | oxidation-reduction process, oxidoreductase activity                                                                                                                                                                                                                                                                                                                                                                                                                                                                     |
| groupX    | 9719209  | 9768476  | G1 | n   | ENSGACG00000007024  | -                | -                                                                                                                                                                                                                                                                                                                                                                                                                                                                                                                        |
| groupX    | 9719209  | 9768476  | G1 | n   | ENSGACG00000007031  | FKBP14 (1 of 2)  | protein folding, calcium ion binding                                                                                                                                                                                                                                                                                                                                                                                                                                                                                     |
| groupX    | 9719209  | 9768476  | G1 | n   | ENSGACG00000007049  | COLQ (2 of 2)    | -                                                                                                                                                                                                                                                                                                                                                                                                                                                                                                                        |
| groupX    | 9719209  | 9768476  | G1 | n   | ENSGACG00000007058  | CYCS (2 of 2)    | iron ion binding, electron carrier activity, heme binding                                                                                                                                                                                                                                                                                                                                                                                                                                                                |
| groupX    | 9719209  | 9768476  | G1 | n   | ENSGACG000000022499 | -                | -                                                                                                                                                                                                                                                                                                                                                                                                                                                                                                                        |
| groupX    | 9719209  | 9768476  | G1 | n   | ENSGACG00000007025  | WIPF3            | protein binding                                                                                                                                                                                                                                                                                                                                                                                                                                                                                                          |
| groupX    | 9946542  | 9963803  | G1 | n   | ENSGACG00000007155  | HIBADH (1 of 2)  | oxidation-reduction process, valine metabolic process, pentose-phosphate shunt, NAD binding, oxidoreductase activity, acting on the CH-OH group of donors, NAD or NADP as acceptor, 3-hydroxyisobutyrate dehydrogenase activity, cofactor binding, phosphogluconate dehydrogenase (decarboxylating) activity                                                                                                                                                                                                             |
| groupX    | 10089566 | 10146761 | G1 | n   | ENSGACG00000007236  | TRAPPC3          | -                                                                                                                                                                                                                                                                                                                                                                                                                                                                                                                        |
| groupX    | 10089566 | 10146761 | G1 | n   | ENSGACG00000007231  | SMAP2            | regulation of ARF GTPase activity, zinc ion binding, ARF GTPase activator activity                                                                                                                                                                                                                                                                                                                                                                                                                                       |
| groupX    | 10688016 | 10750697 | G1 | n   | ENSGACG00000007359  | -                | signal transduction, extracellular space, receptor binding                                                                                                                                                                                                                                                                                                                                                                                                                                                               |
| groupXI   | 7704387  | 7722034  | G1 | psL | ENSGACG00000009943  | -                | metabolic process, oxidoreductase activity                                                                                                                                                                                                                                                                                                                                                                                                                                                                               |
| groupXI   | 7704387  | 7722034  | G1 | psL | ENSGACG00000009926  | NOTCH3           | multicellular organismal development, cell differentiation, regulation of developmental process, Notch signaling pathway, negative regulation of neurogenesis, neural plate development, somatic stem cell maintenance, peripheral nervous system neuron axonogenesis, regulation of receptor-mediated endocytosis, rhombomere boundary formation, pronephros development, liver development, nucleus, membrane, integral to membrane, calcium ion binding, protein binding, histone-lysine N-methyltransferase activity |
| groupXI   | 8287107  | 8301187  | G1 | bg  | ENSGACG00000022150  | -                | -                                                                                                                                                                                                                                                                                                                                                                                                                                                                                                                        |

|           |          |          |    |     |                     |                 |                                                                                                                                                                                                                                                                                                |
|-----------|----------|----------|----|-----|---------------------|-----------------|------------------------------------------------------------------------------------------------------------------------------------------------------------------------------------------------------------------------------------------------------------------------------------------------|
| groupXI   | 8287107  | 8301187  | G1 | bg  | ENSGACG00000010535  | GCCR (1 of 2)   | G-protein coupled receptor signaling pathway, cell surface receptor signaling pathway, membrane, integral to membrane, G-protein coupled receptor activity, transmembrane signaling receptor activity                                                                                          |
| groupXII  | 1073247  | 1129432  | G1 | psR | ENSGACG00000002965  | ZFYVE20         | intracellular, zinc ion binding, metal ion binding                                                                                                                                                                                                                                             |
| groupXII  | 1073247  | 1129432  | G1 | psR | ENSGACG00000002980  | TRH             | hormone-mediated signaling pathway, extracellular region, neuropeptide hormone activity                                                                                                                                                                                                        |
| groupXII  | 1073247  | 1129432  | G1 | psR | ENSGACG00000002982  | TMCC1 (1 of 2)  | -                                                                                                                                                                                                                                                                                              |
| groupXII  | 2565585  | 2609036  | G1 | psR | ENSGACG00000003654  | C20orf151       | -                                                                                                                                                                                                                                                                                              |
| groupXII  | 2565585  | 2609036  | G1 | psR | ENSGACG00000003657  | -               | -                                                                                                                                                                                                                                                                                              |
| groupXII  | 2565585  | 2609036  | G1 | psR | ENSGACG00000003658  | HCK             | protein phosphorylation, ATP binding, protein kinase activity, protein binding, transferase activity, transferring phosphorus-containing groups, protein serine/threonine kinase activity, protein tyrosine kinase activity                                                                    |
| groupXII  | 2886781  | 2912295  | G1 | bg  | ENSGACG00000003767  | PLXNB1 (2 of 2) | signal transduction, membrane, intracellular, protein binding                                                                                                                                                                                                                                  |
| groupXII  | 2886781  | 2912295  | G1 | bg  | ENSGACG00000003742  | -               | protein phosphorylation, ATP binding, protein kinase activity, transferase activity, transferring phosphorus-containing groups, protein serine/threonine kinase activity                                                                                                                       |
| groupXII  | 3336732  | 3371908  | G1 | psR | -                   | -               | -                                                                                                                                                                                                                                                                                              |
| groupXII  | 3576720  | 3613792  | G1 | psR | ENSGACG00000004187  | -               | transposition, DNA-mediated, nucleic acid binding, DNA binding, transposase activity                                                                                                                                                                                                           |
| groupXII  | 3576720  | 3613792  | G1 | psR | ENSGACG00000004167  | LAMB2           | signal transduction, basement membrane assembly, muscle attachment, membrane, signal transducer activity, calcium ion binding, nucleotide binding, protein binding                                                                                                                             |
| groupXII  | 5077932  | 5096005  | G1 | n   | ENSGACG00000004801  | CHST13 (2 of 2) | mismatch repair, integral to membrane, ATP binding, mismatched DNA binding, sulfotransferase activity                                                                                                                                                                                          |
| groupXII  | 13177559 | 13223559 | G1 | psR | ENSGACG000000010477 | NPBWR2          | G-protein coupled receptor signaling pathway, integral to membrane                                                                                                                                                                                                                             |
| groupXII  | 13253104 | 13341703 | G1 | n   | ENSGACG000000010484 | FAM187A         | -                                                                                                                                                                                                                                                                                              |
| groupXII  | 13253104 | 13341703 | G1 | n   | ENSGACG000000010479 | OPRL1           | G-protein coupled receptor signaling pathway, integral to membrane, integral to cell outer membrane, neuropeptide binding                                                                                                                                                                      |
| groupXII  | 13363694 | 13418887 | G1 | psR | ENSGACG000000010505 | SOX18           | DNA binding, protein binding                                                                                                                                                                                                                                                                   |
| groupXII  | 13363694 | 13418887 | G1 | psR | ENSGACG000000010506 | XKR7 (1 of 2)   | -                                                                                                                                                                                                                                                                                              |
| groupXII  | 14246115 | 14252116 | G1 | n   | ENSGACG000000011025 | -               | -                                                                                                                                                                                                                                                                                              |
| groupXII  | 14246115 | 14252116 | G1 | n   | ENSGACG000000011031 | RSBN1           | -                                                                                                                                                                                                                                                                                              |
| groupXII  | 14508108 | 14523108 | G1 | n   | ENSGACG000000011089 | ATP9A           | metabolic process, ATP biosynthetic process, phospholipid transport, membrane, integral to membrane, magnesium ion binding, ATP binding, catalytic activity, ATPase activity, coupled to transmembrane movement of ions, phosphorylative mechanism, phospholipid-translocating ATPase activity |
| groupXII  | 15564258 | 15599508 | G1 | -   | ENSGACG000000011807 | TMEM189         | acid-amino acid ligase activity                                                                                                                                                                                                                                                                |
| groupXII  | 15564258 | 15599508 | G1 | -   | ENSGACG000000011827 | CEBPB           | regulation of transcription, DNA-dependent, response to bacterium, sequence-specific DNA binding transcription factor activity, DNA binding, sequence-specific DNA binding, protein dimerization activity                                                                                      |
| groupXII  | 15564258 | 15599508 | G1 | -   | ENSGACG000000011805 | SLC52A3         | -                                                                                                                                                                                                                                                                                              |
| groupXIII | 0        | 139273   | G1 | psL | ENSGACG00000003228  | STXBP1 (2 of 2) | vesicle-mediated transport, vesicle docking involved in exocytosis                                                                                                                                                                                                                             |
| groupXIII | 0        | 139273   | G1 | psL | ENSGACG00000003297  | DFNB31 (2 of 2) | protein binding                                                                                                                                                                                                                                                                                |
| groupXIII | 0        | 139273   | G1 | psL | ENSGACG00000003309  | NOXA1           | protein binding                                                                                                                                                                                                                                                                                |
| groupXIII | 0        | 139273   | G1 | psL | ENSGACG00000003326  | -               | membrane, calcium ion binding, mannosyl-oligosaccharide 1, 2-alpha-mannosidase activity                                                                                                                                                                                                        |
| groupXIII | 0        | 139273   | G1 | psL | ENSGACG00000003313  | DPP7            | proteolysis, serine-type peptidase activity                                                                                                                                                                                                                                                    |
| groupXIII | 197322   | 267806   | G1 | psL | ENSGACG00000003335  | -               | ion transport, transmembrane transport, membrane, ion channel activity                                                                                                                                                                                                                         |
| groupXIII | 197322   | 267806   | G1 | psL | ENSGACG00000003353  | EHMT1 (2 of 2)  | histone lysine methylation, nucleus, zinc ion binding, protein binding, histone-lysine N-methyltransferase activity                                                                                                                                                                            |
| groupXIII | 1458354  | 1552216  | G1 | psL | ENSGACG00000003927  | DHX37           | -                                                                                                                                                                                                                                                                                              |
| groupXIII | 1458354  | 1552216  | G1 | psL | ENSGACG00000003986  | C22orf39        | -                                                                                                                                                                                                                                                                                              |
| groupXIII | 1458354  | 1552216  | G1 | psL | ENSGACG00000003987  | MRPL40          | -                                                                                                                                                                                                                                                                                              |
| groupXIII | 1458354  | 1552216  | G1 | psL | ENSGACG00000003989  | ACAA2           | metabolic process, catalytic activity, transferase activity, transferring acyl groups other than amino-acyl groups                                                                                                                                                                             |
| groupXIII | 1458354  | 1552216  | G1 | psL | ENSGACG00000004060  | -               | microtubule-based process, microtubule associated complex                                                                                                                                                                                                                                      |
| groupXIII | 1458354  | 1552216  | G1 | psL | ENSGACG00000004070  | POLB            | DNA repair, DNA binding, catalytic activity, DNA-directed DNA polymerase activity, nucleotidyltransferase activity                                                                                                                                                                             |
| groupXIII | 1458354  | 1552216  | G1 | psL | ENSGACG00000004119  | VDAC3 (2 of 2)  | transmembrane transport, anion transport, regulation of anion transport, mitochondrial outer membrane, voltage-gated anion channel activity                                                                                                                                                    |
| groupXIII | 1458354  | 1552216  | G1 | psL | ENSGACG00000003912  | SUB1            | regulation of transcription, DNA-dependent, DNA binding, binding, transcription coactivator activity                                                                                                                                                                                           |
| groupXIII | 1458354  | 1552216  | G1 | psL | ENSGACG00000003940  | UFD1L           | ubiquitin-dependent protein catabolic process, response to chemical stimulus                                                                                                                                                                                                                   |

|           |         |         |    |     |                    |                  |                                                                                                                                                                               |
|-----------|---------|---------|----|-----|--------------------|------------------|-------------------------------------------------------------------------------------------------------------------------------------------------------------------------------|
| groupXIII | 1458354 | 1552216 | G1 | psL | ENSGACG00000004055 | RPL6             | translation, embryo development, intracellular, ribosome, structural constituent of ribosome                                                                                  |
| groupXIII | 1458354 | 1552216 | G1 | psL | ENSGACG00000004114 | C16orf48         | -                                                                                                                                                                             |
| groupXIII | 2960498 | 2986859 | G1 | psL | ENSGACG00000005210 | IMP4             | hydrolase activity                                                                                                                                                            |
| groupXIII | 2960498 | 2986859 | G1 | psL | ENSGACG00000005251 | TRAF2 (2 of 2)   | signal transduction, regulation of apoptotic process, DNA repair, DNA binding, zinc ion binding, metal ion binding, protein binding                                           |
| groupXIII | 2960498 | 2986859 | G1 | psL | ENSGACG00000005204 | ABCB9            | -                                                                                                                                                                             |
| groupXIII | 2960498 | 2986859 | G1 | psL | ENSGACG00000005242 | C9orf86          | -                                                                                                                                                                             |
| groupXIII | 6936681 | 6966411 | G1 | -   | -                  | -                | -                                                                                                                                                                             |
| groupXIII | 7848350 | 7921728 | G1 | psR | -                  | -                | -                                                                                                                                                                             |
| groupXIII | 8191581 | 8270033 | G1 | n   | ENSGACG00000008122 | MLXIP            | regulation of transcription, DNA-dependent, nucleus                                                                                                                           |
| groupXIII | 8191581 | 8270033 | G1 | n   | ENSGACG00000008178 | RSRC2            | -                                                                                                                                                                             |
| groupXIII | 8191581 | 8270033 | G1 | n   | ENSGACG00000008111 | WDR66            | protein binding                                                                                                                                                               |
| groupXIII | 8191581 | 8270033 | G1 | n   | ENSGACG00000008128 | LRRC43           | protein binding                                                                                                                                                               |
| groupXIII | 8191581 | 8270033 | G1 | n   | ENSGACG00000008142 | CLIP1 (1 of 2)   | regulation of transcription, DNA-dependent, sequence-specific DNA binding transcription factor activity, sequence-specific DNA binding                                        |
| groupXIII | 8191581 | 8270033 | G1 | n   | ENSGACG00000008163 | ZCCHC8           | nucleic acid binding, zinc ion binding                                                                                                                                        |
| groupXIII | 8191581 | 8270033 | G1 | n   | ENSGACG00000008197 | KNTC1            | -                                                                                                                                                                             |
| groupXIII | 8501371 | 8534372 | G1 | psR | ENSGACG00000008464 | ANK1 (2 of 2)    | protein binding                                                                                                                                                               |
| groupXIII | 8689352 | 8727457 | G1 | psR | ENSGACG00000008603 | EWSR1            | intracellular, nucleic acid binding, zinc ion binding                                                                                                                         |
| groupXIII | 8689352 | 8727457 | G1 | psR | ENSGACG00000008626 | RHBDD3           | integral to membrane, serine-type endopeptidase activity                                                                                                                      |
| groupXIII | 8689352 | 8727457 | G1 | psR | ENSGACG00000008631 | EMID1            | -                                                                                                                                                                             |
| groupXIII | 8821619 | 8870619 | G1 | psR | ENSGACG00000008754 | -                | neurotransmitter transport, integral to membrane, neurotransmitter:sodium symporter activity                                                                                  |
| groupXIII | 8821619 | 8870619 | G1 | psR | ENSGACG00000008766 | -                | translation, intracellular, ribosome, structural constituent of ribosome                                                                                                      |
| groupXIII | 8821619 | 8870619 | G1 | psR | ENSGACG00000008769 | WSCD2            | phosphorylation, metabolic process, kinase activity, phosphotransferase activity, carboxyl group as acceptor                                                                  |
| groupXIII | 8871328 | 8960771 | G1 | n   | ENSGACG00000008778 | CMKLR1 (1 of 2)  | G-protein coupled receptor signaling pathway, integral to membrane                                                                                                            |
| groupXIII | 8871328 | 8960771 | G1 | n   | ENSGACG00000008784 | FICD             | protein binding                                                                                                                                                               |
| groupXIII | 8871328 | 8960771 | G1 | n   | ENSGACG00000008801 | ISCU (1 of 2)    | iron-sulfur cluster assembly, iron ion binding, iron-sulfur cluster binding                                                                                                   |
| groupXIII | 8871328 | 8960771 | G1 | n   | ENSGACG00000008813 | -                | -                                                                                                                                                                             |
| groupXIII | 8871328 | 8960771 | G1 | n   | ENSGACG00000008814 | TMEM119 (1 of 2) | -                                                                                                                                                                             |
| groupXIII | 8871328 | 8960771 | G1 | n   | ENSGACG00000008861 | DAO              | oxidation-reduction process, oxidoreductase activity, D-amino-acid oxidase activity                                                                                           |
| groupXIII | 8871328 | 8960771 | G1 | n   | ENSGACG00000008787 | SART3            | RNA processing, intracellular, nucleic acid binding                                                                                                                           |
| groupXIII | 8871328 | 8960771 | G1 | n   | ENSGACG00000008856 | SSH1 (1 of 2)    | protein dephosphorylation, dephosphorylation, protein tyrosine/serine/threonine phosphatase activity, phosphatase activity                                                    |
| groupXIII | 8871328 | 8960771 | G1 | n   | ENSGACG00000008816 | CORO1C (1 of 2)  | protein binding                                                                                                                                                               |
| groupXIII | 8965994 | 9005994 | G1 | psR | ENSGACG00000008917 | USP30            | ubiquitin-dependent protein catabolic process, ubiquitin thiolesterase activity                                                                                               |
| groupXIII | 8965994 | 9005994 | G1 | psR | ENSGACG00000008931 | ALKBH2           | oxidoreductase activity                                                                                                                                                       |
| groupXIII | 8965994 | 9005994 | G1 | psR | ENSGACG00000008939 | UNG              | DNA repair, base-excision repair, hydrolase activity, hydrolyzing N-glycosyl compounds, uracil DNA N-glycosylase activity                                                     |
| groupXIII | 8965994 | 9005994 | G1 | psR | ENSGACG00000008963 | PXMP2            | integral to membrane                                                                                                                                                          |
| groupXIII | 8965994 | 9005994 | G1 | psR | ENSGACG00000008971 | ISG15            | protein binding                                                                                                                                                               |
| groupXIII | 8965994 | 9005994 | G1 | psR | ENSGACG00000008973 | GATC             | regulation of translational fidelity                                                                                                                                          |
| groupXIII | 8965994 | 9005994 | G1 | psR | ENSGACG00000008884 | -                | transmembrane transport, integral to membrane, transmembrane transporter activity                                                                                             |
| groupXIII | 8965994 | 9005994 | G1 | psR | ENSGACG00000008977 | SGSM1 (1 of 2)   | regulation of Rab GTPase activity, intracellular, Rab GTPase activator activity                                                                                               |
| groupXIII | 9145297 | 9173731 | G1 | psR | ENSGACG00000009149 | MVK              | phosphorylation, isoprenoid biosynthetic process, cytoplasm, ATP binding, kinase activity, mevalonate kinase activity                                                         |
| groupXIII | 9145297 | 9173731 | G1 | psR | ENSGACG00000009157 | -                | oxidation-reduction process, metabolic process, oxidoreductase activity                                                                                                       |
| groupXIII | 9176940 | 9292143 | G1 | psL | ENSGACG00000009166 | UBE3B            | cellular protein modification process, intracellular, protein binding, acid-amino acid ligase activity                                                                        |
| groupXIII | 9176940 | 9292143 | G1 | psL | ENSGACG00000009196 | KCTD10           | potassium ion transport, membrane, voltage-gated potassium channel complex, protein binding, voltage-gated potassium channel activity                                         |
| groupXIII | 9176940 | 9292143 | G1 | psL | ENSGACG00000009294 | P2RX2            | ion transport, cation transport, ion transmembrane transport, membrane, receptor activity, ATP binding, ion channel activity, extracellular ATP-gated cation channel activity |
| groupXIII | 9176940 | 9292143 | G1 | psL | ENSGACG00000009302 | PES1             | cell proliferation, intracellular, nucleolus,                                                                                                                                 |

|           |          |          |    |     |                    |                   |                                                                                                                                                                                                                                                                                                                                                                                                                                                          |
|-----------|----------|----------|----|-----|--------------------|-------------------|----------------------------------------------------------------------------------------------------------------------------------------------------------------------------------------------------------------------------------------------------------------------------------------------------------------------------------------------------------------------------------------------------------------------------------------------------------|
| groupXIII | 9176940  | 9292143  | G1 | psL | ENSGACG00000009328 | GAL3ST1 (1 of 2)  | biosynthetic process, integral to membrane, Golgi apparatus, galactosylceramide sulfotransferase activity                                                                                                                                                                                                                                                                                                                                                |
| groupXIII | 9176940  | 9292143  | G1 | psL | ENSGACG00000009334 | LZTR1             | ATP binding, protein binding                                                                                                                                                                                                                                                                                                                                                                                                                             |
| groupXIII | 9176940  | 9292143  | G1 | psL | ENSGACG00000009352 | CLDN22            | membrane, tight junction, structural molecule activity                                                                                                                                                                                                                                                                                                                                                                                                   |
| groupXIII | 9176940  | 9292143  | G1 | psL | ENSGACG00000021327 | -                 | -                                                                                                                                                                                                                                                                                                                                                                                                                                                        |
| groupXIII | 9176940  | 9292143  | G1 | psL | ENSGACG00000009207 | MYO1H (2 of 2)    | myosin complex, motor activity, ATP binding, protein binding                                                                                                                                                                                                                                                                                                                                                                                             |
| groupXIII | 9176940  | 9292143  | G1 | psL | ENSGACG00000009215 | FOXN4             | regulation of transcription, DNA-dependent, regulation of heart contraction, positive regulation of transcription, DNA-dependent, sequence-specific DNA binding transcription factor activity, sequence-specific DNA binding                                                                                                                                                                                                                             |
| groupXIII | 9176940  | 9292143  | G1 | psL | ENSGACG00000009222 | ACACB             | metabolic process, fatty acid biosynthetic process, ATP binding, catalytic activity, ligase activity, acetyl-CoA carboxylase activity                                                                                                                                                                                                                                                                                                                    |
| groupXIII | 9176940  | 9292143  | G1 | psL | ENSGACG00000009265 | POLE              | -                                                                                                                                                                                                                                                                                                                                                                                                                                                        |
| groupXIII | 9176940  | 9292143  | G1 | psL | ENSGACG00000009355 | AIFM3             | oxidation-reduction process, oxidoreductase activity, flavin adenine dinucleotide binding, 2 iron, 2 sulfur cluster binding                                                                                                                                                                                                                                                                                                                              |
| groupXIII | 9176940  | 9292143  | G1 | psL | ENSGACG00000009399 | -                 | -                                                                                                                                                                                                                                                                                                                                                                                                                                                        |
| groupXIII | 9314804  | 9336437  | G1 | n   | ENSGACG00000009510 | -                 | -                                                                                                                                                                                                                                                                                                                                                                                                                                                        |
| groupXIII | 9314804  | 9336437  | G1 | n   | ENSGACG00000009529 | -                 | oxidation-reduction process, metabolic process, oxidoreductase activity, acting on the CH-CH group of donors, acyl-CoA dehydrogenase activity                                                                                                                                                                                                                                                                                                            |
| groupXIII | 9314804  | 9336437  | G1 | n   | ENSGACG00000009534 | -                 | -                                                                                                                                                                                                                                                                                                                                                                                                                                                        |
| groupXIII | 9314804  | 9336437  | G1 | n   | ENSGACG00000009515 | MORC2             | -                                                                                                                                                                                                                                                                                                                                                                                                                                                        |
| groupXIII | 9367924  | 9402924  | G1 | n   | ENSGACG00000009556 | PLEKHA2           | protein binding                                                                                                                                                                                                                                                                                                                                                                                                                                          |
| groupXIII | 9367924  | 9402924  | G1 | n   | ENSGACG00000009561 | -                 | -                                                                                                                                                                                                                                                                                                                                                                                                                                                        |
| groupXIII | 9367924  | 9402924  | G1 | n   | ENSGACG00000009550 | TBX5 (2 of 2)     | regulation of transcription, DNA-dependent, nucleus, sequence-specific DNA binding transcription factor activity                                                                                                                                                                                                                                                                                                                                         |
| groupXIII | 9595080  | 9618080  | G1 | n   | ENSGACG00000009839 | SETBP1            | DNA binding                                                                                                                                                                                                                                                                                                                                                                                                                                              |
| groupXIII | 9898412  | 9903412  | G1 | n   | ENSGACG00000010152 | SSBP2             | nucleus, DNA binding                                                                                                                                                                                                                                                                                                                                                                                                                                     |
| groupXIII | 10323390 | 10382503 | G1 | n   | ENSGACG00000010245 | CCNH              | regulation of cyclin-dependent protein kinase activity, holo TFIIF complex, protein kinase binding                                                                                                                                                                                                                                                                                                                                                       |
| groupXIII | 10323390 | 10382503 | G1 | n   | ENSGACG00000010269 | -                 | -                                                                                                                                                                                                                                                                                                                                                                                                                                                        |
| groupXIII | 10323390 | 10382503 | G1 | n   | ENSGACG00000010257 | TMEM161B          | -                                                                                                                                                                                                                                                                                                                                                                                                                                                        |
| groupXIII | 10417423 | 10454423 | G1 | psR | ENSGACG00000010270 | MEF2C (1 of 2)    | regulation of transcription, DNA-dependent, embryonic heart tube morphogenesis, nucleus, sequence-specific DNA binding transcription factor activity, sequence-specific DNA binding                                                                                                                                                                                                                                                                      |
| groupXIII | 10650723 | 10678723 | G1 | psL | ENSGACG00000010293 | WDR54             | protein binding                                                                                                                                                                                                                                                                                                                                                                                                                                          |
| groupXIII | 10650723 | 10678723 | G1 | psL | ENSGACG00000010296 | NOL6              | pathogenesis, RNA binding, hydrolase activity, acting on ester bonds, ribosome binding                                                                                                                                                                                                                                                                                                                                                                   |
| groupXIII | 10650723 | 10678723 | G1 | psL | ENSGACG00000010311 | -                 | DNA binding, protein dimerization activity                                                                                                                                                                                                                                                                                                                                                                                                               |
| groupXIII | 10737507 | 10782507 | G1 | psL | -                  | -                 | -                                                                                                                                                                                                                                                                                                                                                                                                                                                        |
| groupXIII | 13425189 | 13445189 | G1 | psR | ENSGACG00000011961 | SYN1              | -                                                                                                                                                                                                                                                                                                                                                                                                                                                        |
| groupXIII | 13425189 | 13445189 | G1 | psR | ENSGACG00000011968 | C9orf172 (2 of 2) | -                                                                                                                                                                                                                                                                                                                                                                                                                                                        |
| groupXIII | 14222298 | 14253298 | G1 | psL | ENSGACG00000012305 | GPR133            | G-protein coupled receptor signaling pathway, cell surface receptor signaling pathway, neuropeptide signaling pathway, membrane, integral to membrane, G-protein coupled receptor activity, transmembrane signaling receptor activity                                                                                                                                                                                                                    |
| groupXIII | 14222298 | 14253298 | G1 | psL | ENSGACG00000012316 | ULK1 (2 of 2)     | protein phosphorylation, ATP binding, protein kinase activity, transferase activity, transferring phosphorus-containing groups, protein serine/threonine kinase activity                                                                                                                                                                                                                                                                                 |
| groupXIII | 14598812 | 14625972 | G1 | bg  | ENSGACG00000012512 | LRRTM4 (3 of 3)   | protein binding, identical protein binding                                                                                                                                                                                                                                                                                                                                                                                                               |
| groupXIII | 14598812 | 14625972 | G1 | bg  | ENSGACG00000012516 | LRRTM4 (2 of 3)   | protein binding                                                                                                                                                                                                                                                                                                                                                                                                                                          |
| groupXIII | 16949304 | 16969304 | G1 | psR | -                  | -                 | -                                                                                                                                                                                                                                                                                                                                                                                                                                                        |
| groupXIV  | 12877253 | 13015253 | G1 | psL | ENSGACG00000018234 | -                 | nucleic acid binding, zinc ion binding                                                                                                                                                                                                                                                                                                                                                                                                                   |
| groupXIV  | 12877253 | 13015253 | G1 | psL | ENSGACG00000018236 | RASSF6            | signal transduction                                                                                                                                                                                                                                                                                                                                                                                                                                      |
| groupXIV  | 12877253 | 13015253 | G1 | psL | ENSGACG00000018232 | LPAR1             | G-protein coupled receptor signaling pathway, lymphangiogenesis, angiogenesis, integral to membrane                                                                                                                                                                                                                                                                                                                                                      |
| groupXIV  | 12877253 | 13015253 | G1 | psL | ENSGACG00000018237 | -                 | cysteine-type endopeptidase inhibitor activity                                                                                                                                                                                                                                                                                                                                                                                                           |
| groupXIV  | 12877253 | 13015253 | G1 | psL | ENSGACG00000018235 | MUSK              | protein phosphorylation, ATP binding, protein kinase activity, protein binding, transferase activity, transferring phosphorus-containing groups, protein serine/threonine kinase activity, protein tyrosine kinase activity, protein phosphorylation, ATP binding, protein kinase activity, protein binding, transferase activity, transferring phosphorus-containing groups, protein serine/threonine kinase activity, protein tyrosine kinase activity |
| groupXIV  | 15167119 | 15188126 | G1 | n   | ENSGACG00000018673 | MEGF10            | calcium ion binding, protein binding, calcium ion binding, protein binding                                                                                                                                                                                                                                                                                                                                                                               |

|           |          |          |    |     |                    |                  |                                                                                                                                                                                                                                                                                                                                                 |
|-----------|----------|----------|----|-----|--------------------|------------------|-------------------------------------------------------------------------------------------------------------------------------------------------------------------------------------------------------------------------------------------------------------------------------------------------------------------------------------------------|
| groupXV   | 7872184  | 7906502  | G1 | psL | ENSGACG00000009674 | PTAFR            | G-protein coupled receptor signaling pathway, integral to membrane                                                                                                                                                                                                                                                                              |
| groupXV   | 13433359 | 13454359 | G1 | n   | ENSGACG00000012839 | -                | protein phosphorylation, transmembrane receptor protein tyrosine kinase signaling pathway, membrane, ATP binding, protein kinase activity, transferase activity, transferring phosphorus-containing groups, protein serine/threonine kinase activity, transmembrane receptor protein tyrosine kinase activity, protein tyrosine kinase activity |
| groupXV   | 14169959 | 14221959 | G1 | psL | ENSGACG00000012929 | BRE              | -                                                                                                                                                                                                                                                                                                                                               |
| groupXV   | 14169959 | 14221959 | G1 | psL | ENSGACG00000012914 | RBKS             | D-ribose metabolic process, phosphotransferase activity, alcohol group as acceptor, ribokinase activity                                                                                                                                                                                                                                         |
| groupXV   | 14399344 | 14416344 | G1 | bg  | ENSGACG00000013033 | GABRR2 (2 of 2)  | transport, ion transport, membrane, integral to membrane, postsynaptic membrane, extracellular ligand-gated ion channel activity                                                                                                                                                                                                                |
| groupXV   | 14990463 | 15033463 | G1 | psR | -                  | -                | -                                                                                                                                                                                                                                                                                                                                               |
| groupXV   | 15038667 | 15073667 | G1 | n   | -                  | -                | -                                                                                                                                                                                                                                                                                                                                               |
| groupXV   | 15255941 | 15359622 | G1 | psR | -                  | -                | -                                                                                                                                                                                                                                                                                                                                               |
| groupXV   | 15536203 | 15631381 | G1 | psL | ENSGACG00000013180 | DNAL1            | protein binding                                                                                                                                                                                                                                                                                                                                 |
| groupXV   | 15536203 | 15631381 | G1 | psL | ENSGACG00000013199 | C14orf80         | -                                                                                                                                                                                                                                                                                                                                               |
| groupXV   | 15536203 | 15631381 | G1 | psL | ENSGACG00000013205 | PTH2             | cAMP biosynthetic process, positive regulation of receptor activity, receptor agonist activity                                                                                                                                                                                                                                                  |
| groupXV   | 15536203 | 15631381 | G1 | psL | ENSGACG00000013212 | RIN3             | -                                                                                                                                                                                                                                                                                                                                               |
| groupXV   | 15536203 | 15631381 | G1 | psL | ENSGACG00000013158 | ATP10D           | metabolic process, ATP biosynthetic process, cell redox homeostasis, phospholipid transport, membrane, integral to membrane, magnesium ion binding, ATP binding, catalytic activity, ATPase activity, coupled to transmembrane movement of ions, phosphorylative mechanism, phospholipid-translocating ATPase activity                          |
| groupXV   | 15536203 | 15631381 | G1 | psL | ENSGACG00000013166 | DAPP1            | protein binding                                                                                                                                                                                                                                                                                                                                 |
| groupXV   | 15536203 | 15631381 | G1 | psL | ENSGACG00000013169 | -                | Mo-molybdopterin cofactor biosynthetic process, molybdopterin cofactor biosynthetic process                                                                                                                                                                                                                                                     |
| groupXV   | 15636748 | 15651748 | G1 | psL | -                  | -                | -                                                                                                                                                                                                                                                                                                                                               |
| groupXV   | 16086396 | 16128270 | G1 | n   | ENSGACG00000022566 | -                | -                                                                                                                                                                                                                                                                                                                                               |
| groupXV   | 16086396 | 16128270 | G1 | n   | ENSGACG00000013343 | KIF6             | microtubule-based movement, ATP binding, nucleotide binding, nucleoside-triphosphatase activity, microtubule motor activity                                                                                                                                                                                                                     |
| groupXVI  | 653316   | 683138   | G1 | bg  | -                  | -                | -                                                                                                                                                                                                                                                                                                                                               |
| groupXVI  | 5026718  | 5062718  | G1 | n   | ENSGACG00000021409 | -                | -                                                                                                                                                                                                                                                                                                                                               |
| groupXVI  | 5026718  | 5062718  | G1 | n   | ENSGACG00000002287 | OBSL1 (2 of 4)   | protein binding                                                                                                                                                                                                                                                                                                                                 |
| groupXVI  | 5026718  | 5062718  | G1 | n   | ENSGACG00000002298 | CTDSP1 (2 of 2)  | phosphatase activity, protein binding                                                                                                                                                                                                                                                                                                           |
| groupXVI  | 5267708  | 5325411  | G1 | n   | -                  | -                | -                                                                                                                                                                                                                                                                                                                                               |
| groupXVI  | 5361122  | 5446122  | G1 | psR | -                  | -                | -                                                                                                                                                                                                                                                                                                                                               |
| groupXVI  | 5627841  | 5655125  | G1 | n   | -                  | -                | -                                                                                                                                                                                                                                                                                                                                               |
| groupXVI  | 5738247  | 5792247  | G1 | n   | ENSGACG00000002401 | GULP1            | oxidation-reduction process, metabolic process, oxidoreductase activity, protein binding                                                                                                                                                                                                                                                        |
| groupXVI  | 6079523  | 6094523  | G1 | n   | -                  | -                | -                                                                                                                                                                                                                                                                                                                                               |
| groupXVI  | 6466859  | 6487882  | G1 | psL | ENSGACG00000002751 | SLC35F5          | -                                                                                                                                                                                                                                                                                                                                               |
| groupXVI  | 6466859  | 6487882  | G1 | psL | ENSGACG00000002735 | SYMPK            | binding, protein binding                                                                                                                                                                                                                                                                                                                        |
| groupXVI  | 15734211 | 15751307 | G1 | -   | ENSGACG00000007909 | TMEM237 (1 of 2) | -                                                                                                                                                                                                                                                                                                                                               |
| groupXVI  | 15734211 | 15751307 | G1 | -   | ENSGACG00000007889 | MPP4 (2 of 2)    | protein binding                                                                                                                                                                                                                                                                                                                                 |
| groupXVI  | 15734211 | 15751307 | G1 | -   | ENSGACG00000007934 | ABI2 (2 of 2)    | cytoplasm, protein binding                                                                                                                                                                                                                                                                                                                      |
| groupXVII | 4526970  | 4562403  | G1 | n   | ENSGACG00000006050 | TBC1D20          | regulation of Rab GTPase activity, intracellular, Rab GTPase activator activity                                                                                                                                                                                                                                                                 |
| groupXVII | 4526970  | 4562403  | G1 | n   | ENSGACG00000006038 | ZNFX1            | regulation of transcription, DNA-dependent, nucleus, intracellular, sequence-specific DNA binding transcription factor activity, zinc ion binding, electron carrier activity, oxidoreductase activity, nucleotide binding, protein binding, nucleoside-triphosphatase activity                                                                  |
| groupXVII | 4526970  | 4562403  | G1 | n   | ENSGACG00000006056 | RBCK1            | embryonic cranial skeleton morphogenesis, intracellular, zinc ion binding, protein binding                                                                                                                                                                                                                                                      |
| groupXVII | 4526970  | 4562403  | G1 | n   | ENSGACG00000006069 | NECAB3 (2 of 2)  | antibiotic biosynthetic process, cytoplasm, calcium ion binding, oxidoreductase activity                                                                                                                                                                                                                                                        |
| groupXVII | 7003850  | 7152959  | G1 | n   | ENSGACG00000008085 | -                | -                                                                                                                                                                                                                                                                                                                                               |
| groupXVII | 7003850  | 7152959  | G1 | n   | ENSGACG00000007965 | HDAC7            | -                                                                                                                                                                                                                                                                                                                                               |
| groupXVII | 7003850  | 7152959  | G1 | n   | ENSGACG00000007975 | VDR (2 of 2)     | regulation of transcription, DNA-dependent, steroid hormone mediated signaling pathway, nucleus, sequence-specific DNA binding transcription factor activity, steroid hormone receptor activity, zinc ion binding, sequence-specific DNA binding                                                                                                |
| groupXVII | 7003850  | 7152959  | G1 | n   | ENSGACG00000007995 | TENC1 (2 of 2)   | intracellular signal transduction, proteolysis, zinc ion binding, protein binding, metalcarboxypeptidase activity                                                                                                                                                                                                                               |
| groupXVII | 7003850  | 7152959  | G1 | n   | ENSGACG00000008010 | EIF4B            | nucleic acid binding                                                                                                                                                                                                                                                                                                                            |
| groupXVII | 7003850  | 7152959  | G1 | n   | ENSGACG00000008033 | KRT18 (2 of 2)   | -                                                                                                                                                                                                                                                                                                                                               |

|            |          |          |    |     |                    |                   |                                                                                                                                                                                                                                                                                                                                                                  |
|------------|----------|----------|----|-----|--------------------|-------------------|------------------------------------------------------------------------------------------------------------------------------------------------------------------------------------------------------------------------------------------------------------------------------------------------------------------------------------------------------------------|
| groupXVII  | 7193147  | 7267833  | G1 | n   | ENSGACG00000008115 | TGM2 (2 of 2)     | peptide cross-linking, protein-glutamine gamma-glutamyltransferase activity                                                                                                                                                                                                                                                                                      |
| groupXVII  | 7193147  | 7267833  | G1 | n   | ENSGACG00000008135 | KIAA1755 (1 of 2) | regulation of Rho protein signal transduction, organ morphogenesis, mesoderm morphogenesis, intracellular, protein binding, Rho guanyl-nucleotide exchange factor activity                                                                                                                                                                                       |
| groupXVII  | 7331297  | 7393889  | G1 | psL | ENSGACG00000008148 | DLGAP4 (2 of 2)   | cell-cell signaling                                                                                                                                                                                                                                                                                                                                              |
| groupXVII  | 7904088  | 7940830  | G1 | psR | ENSGACG00000008456 | GOLGA7            | -                                                                                                                                                                                                                                                                                                                                                                |
| groupXVII  | 7904088  | 7940830  | G1 | psR | ENSGACG00000008496 | -                 | translational elongation, ribosome biogenesis, embryo development, intracellular, ribosome, structural constituent of ribosome                                                                                                                                                                                                                                   |
| groupXVII  | 7904088  | 7940830  | G1 | psR | ENSGACG00000008420 | LOXL2 (2 of 2)    | oxidation-reduction process, membrane, copper ion binding, scavenger receptor activity, oxidoreductase activity, acting on the CH-NH2 group of donors, oxygen as acceptor                                                                                                                                                                                        |
| groupXVII  | 7904088  | 7940830  | G1 | psR | ENSGACG00000008447 | R3HCC1            | nucleic acid binding                                                                                                                                                                                                                                                                                                                                             |
| groupXVII  | 8019358  | 8043359  | G1 | n   | ENSGACG00000008650 | CRYBB3 (2 of 2)   | -                                                                                                                                                                                                                                                                                                                                                                |
| groupXVII  | 8019358  | 8043359  | G1 | n   | ENSGACG00000008661 | -                 | DNA topological change, DNA binding, ATP binding, DNA topoisomerase (ATP-hydrolyzing) activity                                                                                                                                                                                                                                                                   |
| groupXVII  | 8019358  | 8043359  | G1 | n   | ENSGACG00000008663 | -                 | -                                                                                                                                                                                                                                                                                                                                                                |
| groupXVII  | 8019358  | 8043359  | G1 | n   | ENSGACG00000008668 | -                 | -                                                                                                                                                                                                                                                                                                                                                                |
| groupXVII  | 8019358  | 8043359  | G1 | n   | ENSGACG00000008653 | -                 | -                                                                                                                                                                                                                                                                                                                                                                |
| groupXVII  | 14489682 | 14501682 | G1 | psR | ENSGACG00000012106 | MBD1              | nucleus, DNA binding, zinc ion binding                                                                                                                                                                                                                                                                                                                           |
| groupXVII  | 14489682 | 14501682 | G1 | psR | ENSGACG00000012117 | CXXC1 (1 of 2)    | blood vessel development, DNA methylation on cytosine, hemopoiesis, DNA binding, zinc ion binding, protein binding                                                                                                                                                                                                                                               |
| groupXVII  | 14547262 | 14601262 | G1 | n   | ENSGACG00000012256 | RSG1              | small GTPase mediated signal transduction, protein transport, intracellular, GTP binding                                                                                                                                                                                                                                                                         |
| groupXVII  | 14547262 | 14601262 | G1 | n   | ENSGACG00000012265 | -                 | -                                                                                                                                                                                                                                                                                                                                                                |
| groupXVII  | 14547262 | 14601262 | G1 | n   | ENSGACG00000012289 | EDEM1             | membrane, calcium ion binding, mannosyl-oligosaccharide 1, 2-alpha-mannosidase activity                                                                                                                                                                                                                                                                          |
| groupXVII  | 14547262 | 14601262 | G1 | n   | ENSGACG00000012301 | GNAT1             | signal transduction, G-protein coupled receptor signaling pathway, small GTPase mediated signal transduction, intracellular, signal transducer activity, GTP binding, guanyl nucleotide binding                                                                                                                                                                  |
| groupXVII  | 14547262 | 14601262 | G1 | n   | ENSGACG00000012259 | DDI2              | protein binding                                                                                                                                                                                                                                                                                                                                                  |
| groupXVII  | 14547262 | 14601262 | G1 | n   | ENSGACG00000012267 | ARL8B (2 of 2)    | small GTPase mediated signal transduction, intracellular protein transport, protein transport, intracellular, GTP binding                                                                                                                                                                                                                                        |
| groupXVII  | 14547262 | 14601262 | G1 | n   | ENSGACG00000012225 | EPHA2 (2 of 2)    | protein phosphorylation, membrane, ATP binding, protein kinase activity, protein binding, transferase activity, transferring phosphorus-containing groups, protein serine/threonine kinase activity, ephrin receptor activity, protein tyrosine kinase activity                                                                                                  |
| groupXVIII | 530149   | 558172   | G1 | -   | ENSGACG00000004246 | CNIH3             | intracellular signal transduction, membrane                                                                                                                                                                                                                                                                                                                      |
| groupXVIII | 4292126  | 4323126  | G1 | n   | ENSGACG00000006336 | -                 | -                                                                                                                                                                                                                                                                                                                                                                |
| groupXVIII | 11291668 | 11306921 | G1 | n   | ENSGACG00000011134 | FAM84A            | -                                                                                                                                                                                                                                                                                                                                                                |
| groupXVIII | 11422986 | 11464495 | G1 | -   | ENSGACG00000011162 | DDX1              | nucleic acid binding, ATP binding, protein binding, helicase activity, ATP-dependent helicase activity                                                                                                                                                                                                                                                           |
| groupXVIII | 11422986 | 11464495 | G1 | -   | ENSGACG00000011256 | ITSN2 (2 of 2)    | protein targeting, intracellular protein transport, regulation of Rho protein signal transduction, membrane, intracellular, calcium ion binding, protein binding, Rho guanyl-nucleotide exchange factor activity                                                                                                                                                 |
| groupXVIII | 11422986 | 11464495 | G1 | -   | ENSGACG00000011136 | NBAS              | nuclear-transcribed mRNA catabolic process, nonsense-mediated decay, embryo development, protein binding                                                                                                                                                                                                                                                         |
| groupXVIII | 15953869 | 16029869 | G1 | psL | ENSGACG00000013577 | -                 | protein phosphorylation, protein kinase activity, transferase activity, transferring phosphorus-containing groups                                                                                                                                                                                                                                                |
| groupXVIII | 15953869 | 16029869 | G1 | psL | ENSGACG00000013578 | BUB1              | protein phosphorylation, ATP binding, protein kinase activity, transferase activity, transferring phosphorus-containing groups, protein serine/threonine kinase activity                                                                                                                                                                                         |
| groupXVIII | 15953869 | 16029869 | G1 | psL | ENSGACG00000013580 | GLO1 (2 of 2)     | metal ion binding, lactoylglutathione lyase activity                                                                                                                                                                                                                                                                                                             |
| groupXVIII | 15953869 | 16029869 | G1 | psL | ENSGACG00000013585 | HEY2              | regulation of transcription, DNA-dependent, blood vessel development, blood vessel morphogenesis, artery morphogenesis, dorsal aorta morphogenesis, negative regulation of transcription, DNA-dependent, heart development, Notch signaling pathway involved in arterial endothelial cell fate commitment, vasculogenesis, nucleus, DNA binding, protein binding |
| groupXVIII | 15953869 | 16029869 | G1 | psL | ENSGACG00000013588 | -                 | DNA binding                                                                                                                                                                                                                                                                                                                                                      |
| groupXVIII | 15953869 | 16029869 | G1 | psL | ENSGACG00000013624 | C14orf109         | -                                                                                                                                                                                                                                                                                                                                                                |
| groupXVIII | 15953869 | 16029869 | G1 | psL | ENSGACG00000013571 | PEX7              | protein binding                                                                                                                                                                                                                                                                                                                                                  |
| groupXVIII | 15953869 | 16029869 | G1 | psL | ENSGACG00000013590 | -                 | zinc ion binding, protein binding, ubiquitin-protein ligase activity                                                                                                                                                                                                                                                                                             |
| groupXVIII | 15953869 | 16029869 | G1 | psL | ENSGACG00000013627 | ASB2 (1 of 2)     | intracellular signal transduction, protein binding                                                                                                                                                                                                                                                                                                               |
| groupXX    | 5640315  | 5681686  | G1 | psR | ENSGACG00000006198 | FAM84B            | -                                                                                                                                                                                                                                                                                                                                                                |
| groupXX    | 5640315  | 5681686  | G1 | psR | ENSGACG00000006200 | NSMCE2            | -                                                                                                                                                                                                                                                                                                                                                                |
| groupXX    | 5640315  | 5681686  | G1 | psR | ENSGACG00000006206 | KIAA0196          | heart contraction, axonogenesis, neuron development,                                                                                                                                                                                                                                                                                                             |
| groupXX    | 5640315  | 5681686  | G1 | psR | ENSGACG00000006234 | EXT1 (2 of 2)     | membrane, membrane                                                                                                                                                                                                                                                                                                                                               |

|         |         |         |    |     |                    |                  |                                                                                                                                                                                                                                                                                                                                             |
|---------|---------|---------|----|-----|--------------------|------------------|---------------------------------------------------------------------------------------------------------------------------------------------------------------------------------------------------------------------------------------------------------------------------------------------------------------------------------------------|
| groupXX | 6502867 | 6528298 | G1 | n   | ENSGACG00000006520 | ADCY2 (1 of 3)   | intracellular signal transduction, cyclic nucleotide biosynthetic process, integral to membrane, adenylate cyclase activity, phosphorus-oxygen lyase activity                                                                                                                                                                               |
| groupXX | 6695206 | 6736484 | G1 | -   | -                  | -                | -                                                                                                                                                                                                                                                                                                                                           |
| groupXX | 7589434 | 7602435 | G1 | bg  | ENSGACG00000006665 | -                | -                                                                                                                                                                                                                                                                                                                                           |
| groupXX | 7589434 | 7602435 | G1 | bg  | ENSGACG00000006682 | -                | binding                                                                                                                                                                                                                                                                                                                                     |
| groupXX | 7589434 | 7602435 | G1 | bg  | ENSGACG00000006650 | MTSS1 (1 of 2)   | signal transduction, filopodium assembly, protein binding, cytoskeletal adaptor activity, SH3 domain binding                                                                                                                                                                                                                                |
| groupXX | 7589434 | 7602435 | G1 | bg  | ENSGACG00000006686 | COLEC10          | binding                                                                                                                                                                                                                                                                                                                                     |
| groupXX | 8092576 | 8142761 | G1 | psR | ENSGACG00000007151 | UBXN11           | protein binding                                                                                                                                                                                                                                                                                                                             |
| groupXX | 8092576 | 8142761 | G1 | psR | ENSGACG00000007170 | WDTC1            | protein binding                                                                                                                                                                                                                                                                                                                             |
| groupXX | 8092576 | 8142761 | G1 | psR | ENSGACG00000007178 | TMEM222 (2 of 2) | -                                                                                                                                                                                                                                                                                                                                           |
| groupXX | 8092576 | 8142761 | G1 | psR | ENSGACG00000007188 | -                | protein binding                                                                                                                                                                                                                                                                                                                             |
| groupXX | 8092576 | 8142761 | G1 | psR | ENSGACG00000007195 | -                | -                                                                                                                                                                                                                                                                                                                                           |
| groupXX | 8092576 | 8142761 | G1 | psR | ENSGACG00000007198 | NR0B2            | regulation of transcription, DNA-dependent, steroid hormone mediated signaling pathway, nucleus, sequence-specific DNA binding transcription factor activity, steroid hormone receptor activity                                                                                                                                             |
| groupXX | 8092576 | 8142761 | G1 | psR | ENSGACG00000007199 | GPATCH3          | intracellular, nucleic acid binding,                                                                                                                                                                                                                                                                                                        |
| groupXX | 8092576 | 8142761 | G1 | psR | ENSGACG00000007141 | FEZ2 (2 of 2)    | -                                                                                                                                                                                                                                                                                                                                           |
| groupXX | 8092576 | 8142761 | G1 | psR | ENSGACG00000007163 | CEP85            | -                                                                                                                                                                                                                                                                                                                                           |
| groupXX | 8092576 | 8142761 | G1 | psR | ENSGACG00000007225 | GPN2             | nucleotide binding                                                                                                                                                                                                                                                                                                                          |
| groupXX | 8092576 | 8142761 | G1 | psR | ENSGACG00000007194 | C1orf172         | -                                                                                                                                                                                                                                                                                                                                           |
| groupXX | 8144053 | 8397146 | G1 | n   | ENSGACG00000007244 | ARID1A (2 of 2)  | intracellular, DNA binding, binding                                                                                                                                                                                                                                                                                                         |
| groupXX | 8144053 | 8397146 | G1 | n   | ENSGACG00000007253 | PIGV             | GPI anchor biosynthetic process, integral to membrane, endoplasmic reticulum membrane, ATP binding, ATPase activity, transferase activity, transferring hexosyl groups, GPI anchor biosynthetic process, integral to membrane, endoplasmic reticulum membrane, transferase activity, transferring hexosyl groups                            |
| groupXX | 8144053 | 8397146 | G1 | n   | ENSGACG00000007261 | ZDHC18 (2 of 2)  | regulation of transcription, DNA-dependent, nucleus, sequence-specific DNA binding transcription factor activity, zinc ion binding                                                                                                                                                                                                          |
| groupXX | 8144053 | 8397146 | G1 | n   | ENSGACG00000007269 | FAM46B (1 of 2)  | -                                                                                                                                                                                                                                                                                                                                           |
| groupXX | 8144053 | 8397146 | G1 | n   | ENSGACG00000007286 | TCEA3            | transcription, DNA-dependent, regulation of transcription, DNA-dependent, regulation of transcription elongation, DNA-dependent, transcription elongation, DNA-dependent, regulation of transcription from RNA polymerase II promoter, nucleus, nucleic acid binding, DNA binding, zinc ion binding, translation elongation factor activity |
| groupXX | 8144053 | 8397146 | G1 | n   | ENSGACG00000007300 | OPRD1 (1 of 2)   | G-protein coupled receptor signaling pathway, integral to membrane                                                                                                                                                                                                                                                                          |
| groupXX | 8144053 | 8397146 | G1 | n   | ENSGACG00000007316 | RCC1             | -                                                                                                                                                                                                                                                                                                                                           |
| groupXX | 8144053 | 8397146 | G1 | n   | ENSGACG00000007346 | PHACTR4 (1 of 2) | regulation of transcription, DNA-dependent, transcription initiation, DNA-dependent, sequence-specific DNA binding transcription factor activity, DNA binding, sigma factor activity                                                                                                                                                        |
| groupXX | 8144053 | 8397146 | G1 | n   | ENSGACG00000007350 | HIVP3            | intracellular, nucleic acid binding, zinc ion binding                                                                                                                                                                                                                                                                                       |
| groupXX | 8144053 | 8397146 | G1 | n   | ENSGACG00000007354 | SERINC2 (2 of 2) | membrane, 2 iron, 2 sulfur cluster binding                                                                                                                                                                                                                                                                                                  |
| groupXX | 8144053 | 8397146 | G1 | n   | ENSGACG00000007379 | STMN1 (2 of 2)   | intracellular signal transduction                                                                                                                                                                                                                                                                                                           |
| groupXX | 8144053 | 8397146 | G1 | n   | ENSGACG00000007389 | PAQR7            | oocyte maturation, response to steroid hormone stimulus, negative regulation of adenylate cyclase activity, activation of MAPK activity, signal transduction, steroid hormone mediated signaling pathway, integral to membrane, plasma membrane, steroid binding, steroid hormone receptor activity                                         |
| groupXX | 8399430 | 8497211 | G1 | psR | ENSGACG00000007392 | PTPRU (2 of 2)   | protein dephosphorylation, dephosphorylation, membrane, protein tyrosine phosphatase activity, phosphatase activity, protein binding                                                                                                                                                                                                        |
| groupXX | 8632644 | 8718644 | G1 | -   | ENSGACG00000007482 | -                | intracellular, zinc ion binding                                                                                                                                                                                                                                                                                                             |
| groupXX | 8632644 | 8718644 | G1 | -   | ENSGACG00000007484 | -                | intracellular, zinc ion binding                                                                                                                                                                                                                                                                                                             |
| groupXX | 8632644 | 8718644 | G1 | -   | ENSGACG00000007488 | -                | G-protein coupled receptor signaling pathway, integral to membrane                                                                                                                                                                                                                                                                          |
| groupXX | 8632644 | 8718644 | G1 | -   | ENSGACG00000007491 | -                | G-protein coupled receptor signaling pathway, integral to membrane                                                                                                                                                                                                                                                                          |
| groupXX | 8632644 | 8718644 | G1 | -   | ENSGACG00000007493 | -                | G-protein coupled receptor signaling pathway, integral to membrane                                                                                                                                                                                                                                                                          |
| groupXX | 8632644 | 8718644 | G1 | -   | ENSGACG00000007496 | HAS1             | transferase activity, transferring hexosyl groups                                                                                                                                                                                                                                                                                           |
| groupXX | 8632644 | 8718644 | G1 | -   | ENSGACG00000007461 | -                | proteolysis, catalytic activity, serine-type endopeptidase activity                                                                                                                                                                                                                                                                         |
| groupXX | 8881054 | 8921054 | G1 | n   | ENSGACG00000007563 | -                | regulation of Rab GTPase activity, intracellular, Rab GTPase activator activity                                                                                                                                                                                                                                                             |
| groupXX | 8881054 | 8921054 | G1 | n   | ENSGACG00000007594 | CTRL             | proteolysis, catalytic activity, serine-type endopeptidase activity                                                                                                                                                                                                                                                                         |



|         |          |          |    |     |                    |                 |                                                                                                                                                                                                                                                            |
|---------|----------|----------|----|-----|--------------------|-----------------|------------------------------------------------------------------------------------------------------------------------------------------------------------------------------------------------------------------------------------------------------------|
| groupXX | 8881054  | 8921054  | G1 | n   | ENSGACG00000007597 | -               | G-protein coupled receptor signaling pathway, integral to membrane                                                                                                                                                                                         |
| groupXX | 8881054  | 8921054  | G1 | n   | ENSGACG00000007600 | LIN37           | -                                                                                                                                                                                                                                                          |
| groupXX | 8881054  | 8921054  | G1 | n   | ENSGACG00000007618 | -               | -                                                                                                                                                                                                                                                          |
| groupXX | 8881054  | 8921054  | G1 | n   | ENSGACG00000007622 | -               | -                                                                                                                                                                                                                                                          |
| groupXX | 8881054  | 8921054  | G1 | n   | ENSGACG00000007626 | PSENE1          | negative regulation of neuron apoptotic process, negative regulation of apoptotic process                                                                                                                                                                  |
| groupXX | 8881054  | 8921054  | G1 | n   | ENSGACG00000007569 | -               | -                                                                                                                                                                                                                                                          |
| groupXX | 9112424  | 9126606  | G1 | bg  | ENSGACG00000007711 | NPHS1           | skeletal muscle fiber development, kidney development, protein binding                                                                                                                                                                                     |
| groupXX | 10396730 | 10494942 | G1 | psL | ENSGACG00000008982 | -               | intracellular, zinc ion binding                                                                                                                                                                                                                            |
| groupXX | 10563875 | 10588247 | G1 | psL | -                  | -               | -                                                                                                                                                                                                                                                          |
| groupXX | 10627010 | 10653600 | G1 | bg  | ENSGACG00000009048 | ERP44           | cell redox homeostasis                                                                                                                                                                                                                                     |
| groupXX | 10627010 | 10653600 | G1 | bg  | ENSGACG00000009064 | TEX10           | oxidation-reduction process, oxidoreductase activity, binding, protein binding                                                                                                                                                                             |
| groupXX | 10627010 | 10653600 | G1 | bg  | ENSGACG00000009056 | INVS            | kidney development, cloaca development, body morphogenesis, pronephros morphogenesis, convergent extension involved in gastrulation, protein binding, phosphopantetheine binding                                                                           |
| groupXX | 10658810 | 10682147 | G1 | psL | ENSGACG00000009064 | TEX10           | oxidation-reduction process, oxidoreductase activity, binding, protein binding                                                                                                                                                                             |
| groupXX | 10658810 | 10682147 | G1 | psL | ENSGACG00000009075 | -               | nucleic acid binding, zinc ion binding                                                                                                                                                                                                                     |
| groupXX | 10658810 | 10682147 | G1 | psL | ENSGACG00000009081 | RBM12B (2 of 2) | nucleic acid binding                                                                                                                                                                                                                                       |
| groupXX | 10658810 | 10682147 | G1 | psL | ENSGACG00000009082 | TMEM67          | -                                                                                                                                                                                                                                                          |
| groupXX | 10658810 | 10682147 | G1 | psL | ENSGACG00000009093 | PDP1            | protein dephosphorylation, protein serine/threonine phosphatase complex, catalytic activity, protein serine/threonine phosphatase activity                                                                                                                 |
| groupXX | 10722399 | 10757399 | G1 | psR | ENSGACG00000009169 | ESRP1           | nucleic acid binding                                                                                                                                                                                                                                       |
| groupXX | 10722399 | 10757399 | G1 | psR | ENSGACG00000009138 | KIAA1429        | binding                                                                                                                                                                                                                                                    |
| groupXX | 10722399 | 10757399 | G1 | psR | ENSGACG00000009175 | EPB41L4B        | oxidation-reduction process, malate metabolic process, cytoskeleton, malate dehydrogenase activity                                                                                                                                                         |
| groupXX | 10851499 | 10884499 | G1 | psR | ENSGACG00000009299 | ABCB4           | transport, transmembrane transport, integral to membrane, ATP binding, nucleotide binding, ATPase activity, ATPase activity, coupled to transmembrane movement of substances, nucleoside-triphosphatase activity                                           |
| groupXX | 10851499 | 10884499 | G1 | psR | ENSGACG00000009330 | RUNDC3B         | -                                                                                                                                                                                                                                                          |
| groupXX | 10851499 | 10884499 | G1 | psR | ENSGACG00000009260 | CROT (2 of 2)   | fatty-acyl-CoA binding                                                                                                                                                                                                                                     |
| groupXX | 10851499 | 10884499 | G1 | psR | ENSGACG00000009281 | CROT (1 of 2)   | -                                                                                                                                                                                                                                                          |
| groupXX | 11043669 | 11097669 | G1 | psR | ENSGACG00000009447 | GSK3A (2 of 2)  | protein phosphorylation, heart looping, cardiac muscle cell development, dorsal/ventral pattern formation, ATP binding, protein kinase activity, transferase activity, transferring phosphorus-containing groups, protein serine/threonine kinase activity |
| groupXX | 11043669 | 11097669 | G1 | psR | ENSGACG00000009451 | -               | -                                                                                                                                                                                                                                                          |
| groupXX | 11043669 | 11097669 | G1 | psR | ENSGACG00000009439 | ZNF574          | definitive hemopoiesis, intracellular, DNA binding, zinc ion binding                                                                                                                                                                                       |
| groupXX | 11043669 | 11097669 | G1 | psR | ENSGACG00000009449 | ZNF526          | transcription, DNA-dependent, intracellular, nucleic acid binding, zinc ion binding, metal ion binding                                                                                                                                                     |
| groupXX | 11179475 | 11252505 | G1 | n   | ENSGACG00000009471 | POU2F2 (1 of 2) | regulation of transcription, DNA-dependent, nucleus, sequence-specific DNA binding transcription factor activity, DNA binding, sequence-specific DNA binding, protein binding                                                                              |
| groupXX | 11719578 | 11821763 | G1 | n   | ENSGACG00000010169 | TAPBPL          | protein binding                                                                                                                                                                                                                                            |
| groupXX | 11719578 | 11821763 | G1 | n   | ENSGACG00000010179 | VAMP1           | vesicle-mediated transport, integral to membrane                                                                                                                                                                                                           |
| groupXX | 11719578 | 11821763 | G1 | n   | ENSGACG00000010193 | MRPL51          | -                                                                                                                                                                                                                                                          |
| groupXX | 11719578 | 11821763 | G1 | n   | ENSGACG00000010195 | PLEKHG6         | regulation of Rho protein signal transduction, intracellular, Rho guanyl-nucleotide exchange factor activity                                                                                                                                               |
| groupXX | 11719578 | 11821763 | G1 | n   | ENSGACG00000010200 | TNFRSF1A        | signal transduction, binding, protein binding                                                                                                                                                                                                              |
| groupXX | 11719578 | 11821763 | G1 | n   | ENSGACG00000010207 | IFFO1 (2 of 2)  | -                                                                                                                                                                                                                                                          |
| groupXX | 11719578 | 11821763 | G1 | n   | ENSGACG00000010213 | -               | -                                                                                                                                                                                                                                                          |
| groupXX | 11719578 | 11821763 | G1 | n   | ENSGACG00000010215 | -               | G-protein coupled receptor signaling pathway, integral to membrane                                                                                                                                                                                         |
| groupXX | 11719578 | 11821763 | G1 | n   | ENSGACG00000010219 | -               | oxidation-reduction process, glucose metabolic process, oxidoreductase activity, acting on the aldehyde or oxo group of donors, NAD or NADP as acceptor, NAD binding                                                                                       |
| groupXX | 11719578 | 11821763 | G1 | n   | ENSGACG00000010291 | -               | extracellular region, hormone activity                                                                                                                                                                                                                     |
| groupXX | 11719578 | 11821763 | G1 | n   | ENSGACG00000022897 | -               | -                                                                                                                                                                                                                                                          |
| groupXX | 11719578 | 11821763 | G1 | n   | ENSGACG00000022805 | -               | -                                                                                                                                                                                                                                                          |
| groupXX | 11719578 | 11821763 | G1 | n   | ENSGACG00000010330 | -               | translational elongation, intracellular, translation elongation factor activity                                                                                                                                                                            |

|          |          |          |    |     |                     |                  |                                                                                                                                                                                                        |
|----------|----------|----------|----|-----|---------------------|------------------|--------------------------------------------------------------------------------------------------------------------------------------------------------------------------------------------------------|
| groupXX  | 11719578 | 11821763 | G1 | n   | ENSGACG00000010317  | NOP2             | rRNA processing, RNA binding, methyltransferase activity, S-adenosylmethionine-dependent methyltransferase activity                                                                                    |
| groupXX  | 11719578 | 11821763 | G1 | n   | ENSGACG00000010292  | NCAPD2           | mitotic sister chromatid segregation, binding, viral capsid, zinc ion binding, protein binding, structural molecule activity                                                                           |
| groupXX  | 12498889 | 12525889 | G1 | bg  | ENSGACG00000011540  | SPHK2            | protein kinase C-activating G-protein coupled receptor signaling pathway, diacylglycerol kinase activity                                                                                               |
| groupXX  | 12498889 | 12525889 | G1 | bg  | ENSGACG00000011594  | -                | integral to membrane                                                                                                                                                                                   |
| groupXX  | 12498889 | 12525889 | G1 | bg  | ENSGACG00000011515  | CYTH2            | regulation of ARF protein signal transduction, intracellular, protein binding, ARF guanyl-nucleotide exchange factor activity                                                                          |
| groupXX  | 12498889 | 12525889 | G1 | bg  | ENSGACG00000011547  | RPL18            | translation, intracellular, ribosome, structural constituent of ribosome                                                                                                                               |
| groupXXI | 1217656  | 1234082  | G1 | bg  | -                   | -                | -                                                                                                                                                                                                      |
| groupXXI | 1511040  | 1532040  | G1 | psR | -                   | -                | -                                                                                                                                                                                                      |
| groupXXI | 4520028  | 4559613  | G1 | n   | ENSGACG00000002390  | CTNND2 (2 of 2)  | binding, protein binding                                                                                                                                                                               |
| groupI   | 4487827  | 4543283  | Us | n   | ENSGACG00000007046  | SLC33A1          | central nervous system neuron axonogenesis, membrane                                                                                                                                                   |
| groupI   | 4487827  | 4543283  | Us | n   | ENSGACG00000007060  | -                | G-protein coupled receptor signaling pathway, integral to membrane, G-protein coupled receptor activity                                                                                                |
| groupI   | 4487827  | 4543283  | Us | n   | ENSGACG00000007027  | RPS6KB1 (1 of 2) | protein phosphorylation, ATP binding, protein kinase activity, transferase activity, transferring phosphorus-containing groups, protein serine/threonine kinase activity                               |
| groupI   | 4487827  | 4543283  | Us | n   | ENSGACG00000007053  | GMPS             | purine nucleotide biosynthetic process, GMP biosynthetic process, ATP binding, GMP synthase (glutamine-hydrolyzing) activity                                                                           |
| groupI   | 7530747  | 7556318  | Us | -   | ENSGACG00000008485  | -                | metabolic process, methyltransferase activity                                                                                                                                                          |
| groupI   | 7530747  | 7556318  | Us | -   | ENSGACG00000008504  | PRPF8            | nuclear mRNA splicing, via spliceosome, spliceosomal complex, protein binding                                                                                                                          |
| groupI   | 7530747  | 7556318  | Us | -   | ENSGACG00000008566  | RILP             | DNA binding, catalytic activity                                                                                                                                                                        |
| groupI   | 8107799  | 8162799  | Us | psL | ENSGACG00000009072  | GRIK4            | transport, membrane, outer membrane-bounded periplasmic space, transporter activity, ionotropic glutamate receptor activity, extracellular-glutamate-gated ion channel activity                        |
| groupI   | 8199079  | 8211862  | Us | psR | ENSGACG00000009072  | GRIK4            | transport, membrane, outer membrane-bounded periplasmic space, transporter activity, ionotropic glutamate receptor activity, extracellular-glutamate-gated ion channel activity                        |
| groupI   | 8214565  | 8299728  | Us | n   | -                   | -                | -                                                                                                                                                                                                      |
| groupI   | 9158598  | 9220534  | Us | -   | ENSGACG00000009469  | EGLN2            | oxidation-reduction process, iron ion binding, oxidoreductase activity, oxidoreductase activity, acting on paired donors, with incorporation or reduction of molecular oxygen, L-ascorbic acid binding |
| groupI   | 9158598  | 9220534  | Us | -   | ENSGACG00000009491  | TMEM160          | -                                                                                                                                                                                                      |
| groupI   | 9158598  | 9220534  | Us | -   | ENSGACG00000009494  | NPAS3            | regulation of transcription, DNA-dependent, signal transduction, nucleus, signal transducer activity, protein binding                                                                                  |
| groupI   | 9470441  | 9597441  | Us | n   | ENSGACG00000009621  | -                | growth, growth factor activity                                                                                                                                                                         |
| groupI   | 9470441  | 9597441  | Us | n   | ENSGACG00000009625  | -                | nucleosome assembly, nucleus, intracellular, nucleosome, DNA binding, sequence-specific DNA binding                                                                                                    |
| groupI   | 9470441  | 9597441  | Us | n   | ENSGACG00000009639  | SLC30A10         | transmembrane transport, cation transport, integral to membrane, ATP binding, cation transmembrane transporter activity                                                                                |
| groupI   | 9470441  | 9597441  | Us | n   | ENSGACG000000022167 | -                | -                                                                                                                                                                                                      |
| groupI   | 9470441  | 9597441  | Us | n   | ENSGACG00000009641  | MRPL28           | -                                                                                                                                                                                                      |
| groupI   | 9470441  | 9597441  | Us | n   | ENSGACG00000009656  | RELB             | regulation of transcription, DNA-dependent, nucleus, sequence-specific DNA binding transcription factor activity, protein binding                                                                      |
| groupI   | 9470441  | 9597441  | Us | n   | ENSGACG00000009693  | TBCB             | -                                                                                                                                                                                                      |
| groupI   | 9470441  | 9597441  | Us | n   | ENSGACG00000009721  | SIX5             | regulation of transcription, DNA-dependent, nucleus, sequence-specific DNA binding transcription factor activity, sequence-specific DNA binding, protein binding                                       |
| groupI   | 9470441  | 9597441  | Us | n   | ENSGACG00000009726  | -                | regulation of transcription, DNA-dependent, nucleus, sequence-specific DNA binding transcription factor activity, sequence-specific DNA binding, protein binding                                       |
| groupI   | 9470441  | 9597441  | Us | n   | ENSGACG00000009732  | QPCTL            | proteolysis, peptidase activity                                                                                                                                                                        |
| groupI   | 9470441  | 9597441  | Us | n   | ENSGACG00000009741  | RRM1 (1 of 2)    | oxidation-reduction process, DNA replication, ribonucleoside-diphosphate reductase complex, ATP binding, ribonucleoside-diphosphate reductase activity, thioredoxin disulfide as acceptor              |
| groupI   | 9470441  | 9597441  | Us | n   | ENSGACG00000009629  | PPP1R37          | protein binding                                                                                                                                                                                        |
| groupI   | 9470441  | 9597441  | Us | n   | ENSGACG00000009668  | CLPTM1           | -                                                                                                                                                                                                      |
| groupI   | 10957095 | 11015569 | Us | -   | ENSGACG00000010514  | -                | -                                                                                                                                                                                                      |
| groupI   | 10957095 | 11015569 | Us | -   | ENSGACG00000010517  | HSPA8 (2 of 2)   | -                                                                                                                                                                                                      |
| groupI   | 10957095 | 11015569 | Us | -   | ENSGACG00000010543  | -                | membrane, integral to membrane                                                                                                                                                                         |
| groupI   | 10957095 | 11015569 | Us | -   | ENSGACG00000010488  | PICALM (2 of 2)  | phospholipid binding                                                                                                                                                                                   |
| groupI   | 10957095 | 11015569 | Us | -   | ENSGACG00000010497  | SYTL2 (2 of 2)   | intracellular protein transport, protein binding, Rab GTPase binding                                                                                                                                   |
| groupI   | 10957095 | 11015569 | Us | -   | ENSGACG00000010555  | -                | protein binding                                                                                                                                                                                        |

|          |          |          |    |     |                    |                  |                                                                                                                                                                                                                                             |
|----------|----------|----------|----|-----|--------------------|------------------|---------------------------------------------------------------------------------------------------------------------------------------------------------------------------------------------------------------------------------------------|
| groupI   | 11277968 | 11320968 | Us | psL | -                  | -                | -                                                                                                                                                                                                                                           |
| groupI   | 12165614 | 12232642 | Us | psL | ENSGACG00000011118 | -                | -                                                                                                                                                                                                                                           |
| groupI   | 12165614 | 12232642 | Us | psL | ENSGACG00000011119 | TADA2A           | intracellular, DNA binding, zinc ion binding, protein binding                                                                                                                                                                               |
| groupI   | 12165614 | 12232642 | Us | psL | ENSGACG00000011101 | HNF1B            | regulation of transcription, DNA-dependent, positive regulation of transcription, DNA-dependent, nucleus, sequence-specific DNA binding transcription factor activity, DNA binding, sequence-specific DNA binding, binding, protein binding |
| groupI   | 12165614 | 12232642 | Us | psL | ENSGACG00000011112 | SYNRG            | protein binding                                                                                                                                                                                                                             |
| groupI   | 12408358 | 12521538 | Us | psR | ENSGACG00000011316 | DIABLO (2 of 2)  | induction of apoptosis, activation of cysteine-type endopeptidase activity involved in apoptotic process, mitochondrion                                                                                                                     |
| groupI   | 12408358 | 12521538 | Us | psR | ENSGACG00000011318 | -                | G-protein coupled receptor signaling pathway, integral to membrane                                                                                                                                                                          |
| groupI   | 12408358 | 12521538 | Us | psR | ENSGACG00000011320 | -                | G-protein coupled receptor signaling pathway, integral to membrane                                                                                                                                                                          |
| groupI   | 12408358 | 12521538 | Us | psR | ENSGACG00000011322 | -                | -                                                                                                                                                                                                                                           |
| groupI   | 12408358 | 12521538 | Us | psR | ENSGACG00000011325 | -                | G-protein coupled receptor signaling pathway, integral to membrane                                                                                                                                                                          |
| groupI   | 12408358 | 12521538 | Us | psR | ENSGACG00000011326 | -                | G-protein coupled receptor signaling pathway, integral to membrane                                                                                                                                                                          |
| groupI   | 12408358 | 12521538 | Us | psR | ENSGACG00000011330 | DIABLO (1 of 2)  | induction of apoptosis, activation of cysteine-type endopeptidase activity involved in apoptotic process, mitochondrion                                                                                                                     |
| groupI   | 12408358 | 12521538 | Us | psR | ENSGACG00000011337 | PVRL3 (1 of 2)   | protein binding                                                                                                                                                                                                                             |
| groupI   | 12408358 | 12521538 | Us | psR | ENSGACG00000011342 | -                | -                                                                                                                                                                                                                                           |
| groupI   | 13139791 | 13157031 | Us | psL | ENSGACG00000011405 | STIM1            | -                                                                                                                                                                                                                                           |
| groupI   | 13384179 | 13414179 | Us | n   | -                  | -                | -                                                                                                                                                                                                                                           |
| groupI   | 15770959 | 15799963 | Us | n   | ENSGACG00000012339 | -                | positive regulation of cysteine-type endopeptidase activity involved in apoptotic process, positive regulation of apoptotic process                                                                                                         |
| groupI   | 15770959 | 15799963 | Us | n   | ENSGACG00000012342 | SAE1             | catalytic activity                                                                                                                                                                                                                          |
| groupI   | 15770959 | 15799963 | Us | n   | ENSGACG00000012374 | ZC3H4            | -                                                                                                                                                                                                                                           |
| groupI   | 21231916 | 21264234 | Us | n   | -                  | -                | -                                                                                                                                                                                                                                           |
| groupII  | 2903840  | 2937453  | Us | n   | -                  | -                | -                                                                                                                                                                                                                                           |
| groupII  | 6647219  | 6663905  | Us | bg  | -                  | -                | -                                                                                                                                                                                                                                           |
| groupII  | 7879800  | 8030972  | Us | psL | ENSGACG00000015368 | GPC5             | membrane, proteinaceous extracellular matrix, protein binding, heparan sulfate proteoglycan binding                                                                                                                                         |
| groupII  | 7879800  | 8030972  | Us | psL | ENSGACG00000015374 | GPC6 (1 of 2)    | membrane, proteinaceous extracellular matrix, protein binding, heparan sulfate proteoglycan binding                                                                                                                                         |
| groupII  | 10216999 | 10285601 | Us | n   | ENSGACG00000015701 | -                | RNA metabolic process, binding, protein binding                                                                                                                                                                                             |
| groupII  | 10216999 | 10285601 | Us | n   | ENSGACG00000015700 | CTR9             | RNA processing, pigmentation, neural crest cell development, somitogenesis, intracellular, Cdc73/Paf1 complex, nucleus, protein binding                                                                                                     |
| groupII  | 10216999 | 10285601 | Us | n   | ENSGACG00000015704 | GALNTL4 (1 of 2) | -                                                                                                                                                                                                                                           |
| groupII  | 10216999 | 10285601 | Us | n   | ENSGACG00000015698 | MRVI1            | -                                                                                                                                                                                                                                           |
| groupII  | 10991396 | 11067396 | Us | -   | ENSGACG00000015782 | -                | nucleic acid binding, protein binding                                                                                                                                                                                                       |
| groupII  | 11994580 | 12025583 | Us | psL | ENSGACG00000015954 | DBNDD1           | cytoplasm                                                                                                                                                                                                                                   |
| groupII  | 11994580 | 12025583 | Us | psL | ENSGACG00000015955 | MTHFSD           | folic acid-containing compound biosynthetic process, nucleic acid binding, ATP binding, 5-formyltetrahydrofolate cyclo-ligase activity                                                                                                      |
| groupII  | 11994580 | 12025583 | Us | psL | ENSGACG00000015956 | FOXF1            | regulation of transcription, DNA-dependent, sequence-specific DNA binding transcription factor activity, sequence-specific DNA binding                                                                                                      |
| groupII  | 12297958 | 12324764 | Us | psL | ENSGACG00000015978 | CDYL2            | metabolic process, nucleus, catalytic activity                                                                                                                                                                                              |
| groupII  | 12361189 | 12448667 | Us | psL | -                  | -                | -                                                                                                                                                                                                                                           |
| groupII  | 12450247 | 12503247 | Us | psL | -                  | -                | -                                                                                                                                                                                                                                           |
| groupII  | 13198025 | 13224025 | Us | psL | ENSGACG00000016050 | CSMD1            | -                                                                                                                                                                                                                                           |
| groupII  | 17198240 | 17218357 | Us | bg  | -                  | -                | -                                                                                                                                                                                                                                           |
| groupIII | 5824829  | 5858829  | Us | n   | -                  | -                | -                                                                                                                                                                                                                                           |
| groupIII | 6296853  | 6412575  | Us | psL | ENSGACG00000014942 | ANKRD45          | protein binding                                                                                                                                                                                                                             |
| groupIII | 6296853  | 6412575  | Us | psL | ENSGACG00000014944 | -                | nucleic acid binding                                                                                                                                                                                                                        |
| groupIII | 6296853  | 6412575  | Us | psL | ENSGACG00000022137 | -                | -                                                                                                                                                                                                                                           |
| groupIII | 6296853  | 6412575  | Us | psL | ENSGACG00000014947 | FITM1 (2 of 2)   | regulation of transcription, DNA-dependent, G-protein coupled receptor signaling pathway, nucleus, integral to membrane, sequence-specific DNA binding                                                                                      |
| groupIII | 6296853  | 6412575  | Us | psL | ENSGACG00000014948 | -                | vesicle-mediated transport, membrane, myosin complex, motor activity, ATP binding, nucleotide binding, protein binding                                                                                                                      |

|          |          |          |    |     |                    |                  |                                                                                                                                                                                                                                                                                                                                   |
|----------|----------|----------|----|-----|--------------------|------------------|-----------------------------------------------------------------------------------------------------------------------------------------------------------------------------------------------------------------------------------------------------------------------------------------------------------------------------------|
| groupIII | 6296853  | 6412575  | Us | psL | ENSGACG00000014960 | -                | vesicle-mediated transport, embryonic heart tube development, ventricular cardiac myofibril development, membrane, myosin complex, motor activity, ATP binding, nucleotide binding, protein binding                                                                                                                               |
| groupIII | 11614526 | 11702466 | Us | -   | ENSGACG00000016730 | -                | carbohydrate metabolic process, catalytic activity, cation binding                                                                                                                                                                                                                                                                |
| groupIII | 11614526 | 11702466 | Us | -   | ENSGACG00000016740 | -                | carbohydrate metabolic process, catalytic activity, cation binding                                                                                                                                                                                                                                                                |
| groupIII | 11614526 | 11702466 | Us | -   | ENSGACG00000016719 | -                | signal transduction, cell adhesion, collagen, extracellular matrix structural constituent, receptor binding, structural molecule activity                                                                                                                                                                                         |
| groupIV  | 7589314  | 7721800  | Us | n   | ENSGACG00000017504 | ENOX2 (1 of 2)   | nucleic acid binding                                                                                                                                                                                                                                                                                                              |
| groupIV  | 8324156  | 8359468  | Us | -   | ENSGACG00000017666 | SLC16A2          | transmembrane transport, integral to membrane                                                                                                                                                                                                                                                                                     |
| groupIV  | 8324156  | 8359468  | Us | -   | ENSGACG00000017676 | -                | -                                                                                                                                                                                                                                                                                                                                 |
| groupIV  | 8324156  | 8359468  | Us | -   | ENSGACG00000017669 | -                | -                                                                                                                                                                                                                                                                                                                                 |
| groupIV  | 8324156  | 8359468  | Us | -   | ENSGACG00000017671 | F8               | oxidation-reduction process, cell adhesion, oxidoreductase activity, copper ion binding                                                                                                                                                                                                                                           |
| groupIV  | 8497040  | 8559841  | Us | n   | ENSGACG00000017689 | TSC22D3          | regulation of transcription, DNA-dependent, sequence-specific DNA binding transcription factor activity                                                                                                                                                                                                                           |
| groupIV  | 9314165  | 9376941  | Us | n   | ENSGACG00000017830 | ZDHHC5 (2 of 2)  | regulation of transcription, DNA-dependent, nucleus, sequence-specific DNA binding transcription factor activity, zinc ion binding                                                                                                                                                                                                |
| groupIV  | 9314165  | 9376941  | Us | n   | ENSGACG00000017836 | -                | protein binding                                                                                                                                                                                                                                                                                                                   |
| groupIV  | 9314165  | 9376941  | Us | n   | ENSGACG00000017837 | SLC43A3 (2 of 2) | -                                                                                                                                                                                                                                                                                                                                 |
| groupIV  | 9314165  | 9376941  | Us | n   | ENSGACG00000017843 | -                | -                                                                                                                                                                                                                                                                                                                                 |
| groupIV  | 9314165  | 9376941  | Us | n   | ENSGACG00000017844 | -                | intracellular, zinc ion binding                                                                                                                                                                                                                                                                                                   |
| groupIV  | 9314165  | 9376941  | Us | n   | ENSGACG00000017832 | CLP1             | -                                                                                                                                                                                                                                                                                                                                 |
| groupIV  | 11062430 | 11085457 | Us | n   | ENSGACG00000018040 | -                | G-protein coupled receptor signaling pathway, negative regulation of adenylate cyclase activity, integral to membrane                                                                                                                                                                                                             |
| groupIV  | 11062430 | 11085457 | Us | n   | ENSGACG00000018041 | -                | -                                                                                                                                                                                                                                                                                                                                 |
| groupIV  | 11212342 | 11243185 | Us | psL | -                  | -                | -                                                                                                                                                                                                                                                                                                                                 |
| groupIV  | 11559888 | 11612888 | Us | psL | ENSGACG00000018137 | EGR1             | camera-type eye development                                                                                                                                                                                                                                                                                                       |
| groupIV  | 12379339 | 12459749 | Us | psL | ENSGACG00000018271 | -                | signal transduction, GTP catabolic process, small GTPase mediated signal transduction, intracellular protein transport, nucleocytoplasmic transport, protein transport, intracellular, GTPase activity, GTP binding                                                                                                               |
| groupIV  | 12379339 | 12459749 | Us | psL | ENSGACG00000022698 | -                | -                                                                                                                                                                                                                                                                                                                                 |
| groupIV  | 12379339 | 12459749 | Us | psL | ENSGACG00000018279 | ACRC             | protein binding                                                                                                                                                                                                                                                                                                                   |
| groupIV  | 12379339 | 12459749 | Us | psL | ENSGACG00000018281 | CETN2            | nucleic acid binding, calcium ion binding, ATP binding, ATP-dependent helicase activity                                                                                                                                                                                                                                           |
| groupIV  | 12379339 | 12459749 | Us | psL | ENSGACG00000018285 | NSDHL            | cellular metabolic process, steroid biosynthetic process, extracellular polysaccharide biosynthetic process, catalytic activity, coenzyme binding, 3-beta-hydroxy-delta5-steroid dehydrogenase activity, dTDP-4-dehydrorhamnose reductase activity                                                                                |
| groupIV  | 12379339 | 12459749 | Us | psL | ENSGACG00000018286 | -                | -                                                                                                                                                                                                                                                                                                                                 |
| groupIV  | 12379339 | 12459749 | Us | psL | ENSGACG00000018287 | ZNF185           | zinc ion binding                                                                                                                                                                                                                                                                                                                  |
| groupIV  | 12379339 | 12459749 | Us | psL | ENSGACG00000018273 | OGT              | RNA processing, intracellular, protein binding                                                                                                                                                                                                                                                                                    |
| groupIV  | 13315254 | 13353873 | Us | -   | ENSGACG00000018357 | RMND5B           | protein binding, protein binding, protein binding                                                                                                                                                                                                                                                                                 |
| groupIV  | 13315254 | 13353873 | Us | -   | ENSGACG00000018359 | N4BP3            | -                                                                                                                                                                                                                                                                                                                                 |
| groupIV  | 13930138 | 13974395 | Us | -   | ENSGACG00000018432 | STC2             | extracellular region, hormone activity                                                                                                                                                                                                                                                                                            |
| groupIV  | 13930138 | 13974395 | Us | -   | ENSGACG00000018433 | NKX2-5           | regulation of transcription, DNA-dependent, embryonic heart tube development, heart looping, heart morphogenesis, cardiac muscle cell proliferation, cardiac muscle cell differentiation, heart development, nucleus, sequence-specific DNA binding transcription factor activity, sequence-specific DNA binding, protein binding |
| groupIV  | 15566478 | 15592478 | Us | n   | ENSGACG00000018543 | HDX              | regulation of transcription, DNA-dependent, sequence-specific DNA binding transcription factor activity, sequence-specific DNA binding, protein binding                                                                                                                                                                           |
| groupIV  | 15566478 | 15592478 | Us | n   | ENSGACG00000018542 | -                | regulation of signal transduction, membrane, cytoplasm, protein binding                                                                                                                                                                                                                                                           |
| groupIV  | 15566478 | 15592478 | Us | n   | ENSGACG00000018545 | RPS6KA6          | protein phosphorylation, intracellular, zinc ion binding, ATP binding, protein kinase activity, transferase activity, transferring phosphorus-containing groups, protein serine/threonine kinase activity                                                                                                                         |
| groupIV  | 18755894 | 18802005 | Us | psL | ENSGACG00000018882 | PNPLA8 (2 of 2)  | metabolic process, lipid metabolic process                                                                                                                                                                                                                                                                                        |
| groupIV  | 18755894 | 18802005 | Us | psL | ENSGACG00000018875 | NRCAM            | protein binding                                                                                                                                                                                                                                                                                                                   |
| groupIV  | 18808297 | 18837297 | Us | n   | ENSGACG00000018888 | D-JB9-(2-of-2)   | heat shock protein binding                                                                                                                                                                                                                                                                                                        |
| groupIV  | 18808297 | 18837297 | Us | n   | ENSGACG00000018891 | -                | oxidation-reduction process, oxidoreductase activity                                                                                                                                                                                                                                                                              |
| groupIV  | 18808297 | 18837297 | Us | n   | ENSGACG00000018894 | -                | oxidation-reduction process, oxidoreductase activity                                                                                                                                                                                                                                                                              |
| groupIV  | 18808297 | 18837297 | Us | n   | ENSGACG00000018887 | THAP5            | nucleic acid binding                                                                                                                                                                                                                                                                                                              |

|         |          |          |    |     |                    |                   |                                                                                                                                                                                                                                                                                                               |
|---------|----------|----------|----|-----|--------------------|-------------------|---------------------------------------------------------------------------------------------------------------------------------------------------------------------------------------------------------------------------------------------------------------------------------------------------------------|
| groupIV | 18839597 | 18879597 | Us | psL | ENSGACG00000018910 | TFEC              | regulation of transcription, DNA-dependent, nucleus                                                                                                                                                                                                                                                           |
| groupIV | 19235599 | 19294646 | Us | n   | ENSGACG00000018919 | IFRD1             | binding                                                                                                                                                                                                                                                                                                       |
| groupIV | 19235599 | 19294646 | Us | n   | ENSGACG00000018918 | TMEM168 (2 of 2)  | -                                                                                                                                                                                                                                                                                                             |
| groupIV | 19485417 | 19554417 | Us | n   | ENSGACG00000018926 | LRRN3             | protein binding                                                                                                                                                                                                                                                                                               |
| groupIV | 19485417 | 19554417 | Us | n   | ENSGACG00000018927 | -                 | -                                                                                                                                                                                                                                                                                                             |
| groupIV | 19671285 | 19726492 | Us | -   | ENSGACG00000018935 | DHX57             | nucleic acid binding, zinc ion binding, ATP binding, protein binding, helicase activity, ATP-dependent helicase activity                                                                                                                                                                                      |
| groupIV | 19671285 | 19726492 | Us | -   | ENSGACG00000018938 | FAM40B            | nucleobase-containing compound metabolic process, nucleic acid binding, nucleotide binding, DNA-directed DNA polymerase activity                                                                                                                                                                              |
| groupIV | 19671285 | 19726492 | Us | -   | ENSGACG00000018942 | AHCYL2 (1 of 2)   | one-carbon metabolic process, adenosylhomocysteinase activity                                                                                                                                                                                                                                                 |
| groupIV | 20101884 | 20148884 | Us | -   | -                  | -                 | -                                                                                                                                                                                                                                                                                                             |
| groupIV | 21550848 | 21710849 | Us | psR | ENSGACG00000019098 | ARL1              | small GTPase mediated signal transduction, intracellular protein transport, protein transport, intracellular, GTP binding                                                                                                                                                                                     |
| groupIV | 21550848 | 21710849 | Us | psR | ENSGACG00000019105 | FGD4 (2 of 2)     | regulation of Rho protein signal transduction, intracellular, metal ion binding, protein binding, Rho guanyl-nucleotide exchange factor activity                                                                                                                                                              |
| groupIV | 21550848 | 21710849 | Us | psR | ENSGACG00000019107 | MAPK11            | proteolysis, protein phosphorylation, zinc ion binding, ATP binding, protein kinase activity, transferase activity, transferring phosphorus-containing groups, protein serine/threonine kinase activity, metalloproteinase activity, MAP kinase activity                                                      |
| groupIV | 21550848 | 21710849 | Us | psR | ENSGACG00000019110 | -                 | protein binding, protein binding, protein binding                                                                                                                                                                                                                                                             |
| groupIV | 21550848 | 21710849 | Us | psR | ENSGACG00000019114 | XRCC6BP1          | -                                                                                                                                                                                                                                                                                                             |
| groupIV | 21550848 | 21710849 | Us | psR | ENSGACG00000019116 | SLC16A7           | transmembrane transport, organic anion transport, integral to membrane, secondary active monocarboxylate transmembrane transporter activity                                                                                                                                                                   |
| groupIV | 21550848 | 21710849 | Us | psR | ENSGACG00000019092 | UTP20             | -                                                                                                                                                                                                                                                                                                             |
| groupIV | 21550848 | 21710849 | Us | psR | ENSGACG00000019104 | KIAA1147 (2 of 2) | metabolic process, transferase activity, transferring acyl groups other than amino-acyl groups                                                                                                                                                                                                                |
| groupIV | 21550848 | 21710849 | Us | psR | ENSGACG00000019108 | MAPK12 (2 of 2)   | protein phosphorylation, ATP binding, protein kinase activity, transferase activity, transferring phosphorus-containing groups, protein serine/threonine kinase activity, MAP kinase activity                                                                                                                 |
| groupIV | 21550848 | 21710849 | Us | psR | ENSGACG00000019113 | RPAP3             | metabolic process, transferase activity, protein binding                                                                                                                                                                                                                                                      |
| groupIV | 21550848 | 21710849 | Us | psR | ENSGACG00000019115 | LRIG3             | -                                                                                                                                                                                                                                                                                                             |
| groupIV | 21925482 | 22113230 | Us | psL | ENSGACG00000019136 | PLXNC1            | signal transduction, intracellular                                                                                                                                                                                                                                                                            |
| groupIV | 21925482 | 22113230 | Us | psL | ENSGACG00000019145 | HCFC2             | protein binding                                                                                                                                                                                                                                                                                               |
| groupIV | 21925482 | 22113230 | Us | psL | ENSGACG00000019147 | ELK3              | regulation of transcription, DNA-dependent, sequence-specific DNA binding transcription factor activity, sequence-specific DNA binding                                                                                                                                                                        |
| groupIV | 21925482 | 22113230 | Us | psL | ENSGACG00000019150 | PHYH              | -                                                                                                                                                                                                                                                                                                             |
| groupIV | 21925482 | 22113230 | Us | psL | ENSGACG00000019155 | MCM10             | -                                                                                                                                                                                                                                                                                                             |
| groupIV | 21925482 | 22113230 | Us | psL | ENSGACG00000019159 | CCDC3             | -                                                                                                                                                                                                                                                                                                             |
| groupIV | 21925482 | 22113230 | Us | psL | ENSGACG00000019163 | CDC123            | -                                                                                                                                                                                                                                                                                                             |
| groupIV | 21925482 | 22113230 | Us | psL | ENSGACG00000019134 | RERG              | small GTPase mediated signal transduction, protein transport, intracellular, GTP binding, signal transduction, GTP catabolic process, small GTPase mediated signal transduction, intracellular protein transport, nucleocytoplasmic transport, protein transport, intracellular, GTPase activity, GTP binding |
| groupIV | 21925482 | 22113230 | Us | psL | ENSGACG00000019139 | CCDC41            | -                                                                                                                                                                                                                                                                                                             |
| groupIV | 21925482 | 22113230 | Us | psL | ENSGACG00000019148 | CDK17 (1 of 2)    | protein phosphorylation, ATP binding, protein kinase activity, transferase activity, transferring phosphorus-containing groups, protein serine/threonine kinase activity                                                                                                                                      |
| groupIV | 21925482 | 22113230 | Us | psL | ENSGACG00000019153 | UCMA (1 of 2)     | -                                                                                                                                                                                                                                                                                                             |
| groupIV | 21925482 | 22113230 | Us | psL | ENSGACG00000019156 | OPTN              | -                                                                                                                                                                                                                                                                                                             |
| groupIV | 21925482 | 22113230 | Us | psL | ENSGACG00000019160 | CAMK1D (2 of 2)   | protein phosphorylation, ATP binding, protein kinase activity, transferase activity, transferring phosphorus-containing groups, protein serine/threonine kinase activity                                                                                                                                      |
| groupIV | 25239236 | 25277236 | Us | psR | -                  | -                 | -                                                                                                                                                                                                                                                                                                             |
| groupIV | 28413742 | 28430742 | Us | psL | ENSGACG00000019659 | TMEM60 (1 of 2)   | -                                                                                                                                                                                                                                                                                                             |
| groupIX | 8639541  | 8750371  | Us | bg  | ENSGACG00000017767 | GUCY1A3           | intracellular signal transduction, cyclic nucleotide biosynthetic process, cGMP biosynthetic process, phosphorus-oxygen lyase activity, guanylate cyclase activity                                                                                                                                            |
| groupIX | 8639541  | 8750371  | Us | bg  | ENSGACG00000017790 | FABP2 (1 of 2)    | transport, binding, transporter activity, lipid binding                                                                                                                                                                                                                                                       |
| groupIX | 8639541  | 8750371  | Us | bg  | ENSGACG00000017796 | USP53 (2 of 2)    | -                                                                                                                                                                                                                                                                                                             |

|          |          |          |    |     |                    |                   |                                                                                                                                                                                                                        |
|----------|----------|----------|----|-----|--------------------|-------------------|------------------------------------------------------------------------------------------------------------------------------------------------------------------------------------------------------------------------|
| groupIX  | 8639541  | 8750371  | Us | bg  | ENSGACG00000017804 | MYOZ2 (1 of 2)    | -                                                                                                                                                                                                                      |
| groupIX  | 8639541  | 8750371  | Us | bg  | ENSGACG00000017814 | SLC22A7 (2 of 2)  | transmembrane transport, integral to membrane, transmembrane transporter activity                                                                                                                                      |
| groupIX  | 8639541  | 8750371  | Us | bg  | ENSGACG00000017840 | SOD3              | oxidation-reduction process, superoxide metabolic process, metal ion binding                                                                                                                                           |
| groupIX  | 8639541  | 8750371  | Us | bg  | ENSGACG00000017841 | CCDC149 (2 of 2)  | -                                                                                                                                                                                                                      |
| groupIX  | 8639541  | 8750371  | Us | bg  | ENSGACG00000017845 | LG12 (2 of 2)     | carbohydrate metabolic process, catalytic activity, protein binding, carbohydrate binding                                                                                                                              |
| groupIX  | 8639541  | 8750371  | Us | bg  | ENSGACG00000017809 | PSMD5             | binding                                                                                                                                                                                                                |
| groupIX  | 8639541  | 8750371  | Us | bg  | ENSGACG00000017826 | DHX15 (1 of 2)    | nucleic acid binding, ATP binding, nucleotide binding, helicase activity, ATP-dependent helicase activity, nucleoside-triphosphatase activity                                                                          |
| groupIX  | 8639541  | 8750371  | Us | bg  | ENSGACG00000017850 | MTTP              | lipid transport, long-chain fatty acid transport, medium-chain fatty acid transport, digestion, lipid metabolic process, lipid transporter activity                                                                    |
| groupIX  | 8639541  | 8750371  | Us | bg  | ENSGACG00000017771 | GUCY1B3           | intracellular signal transduction, cyclic nucleotide biosynthetic process, cGMP biosynthetic process, heme binding, phosphorus-oxygen lyase activity, guanylate cyclase activity                                       |
| groupIX  | 9507731  | 9564731  | Us | n   | ENSGACG00000018013 | PRSS12            | proteolysis, membrane, catalytic activity, serine-type endopeptidase activity, scavenger receptor activity, proteolysis, membrane, catalytic activity, serine-type endopeptidase activity, scavenger receptor activity |
| groupIX  | 9507731  | 9564731  | Us | n   | ENSGACG00000018022 | NDST4             | DNA recombination, double-strand break repair via homologous recombination, regulation of S phase of mitotic cell cycle, nucleus, single-stranded DNA binding, sulfotransferase activity                               |
| groupIX  | 11478480 | 11511943 | Us | psR | ENSGACG00000018405 | C4orf33           | -                                                                                                                                                                                                                      |
| groupIX  | 11478480 | 11511943 | Us | psR | ENSGACG00000018401 | SCLT1             | -                                                                                                                                                                                                                      |
| groupIX  | 13623617 | 13650617 | Us | psL | ENSGACG00000018609 | CLTA              | intracellular protein transport, vesicle-mediated transport, clathrin coat of trans-Golgi network vesicle, clathrin coat of coated pit, structural molecule activity                                                   |
| groupIX  | 13623617 | 13650617 | Us | psL | ENSGACG00000018604 | GNE               | lipopolysaccharide biosynthetic process, UDP-N-acetylglucosamine metabolic process, UDP-N-acetylglucosamine 2-epimerase activity                                                                                       |
| groupV   | 841568   | 890568   | Us | psL | ENSGACG00000002397 | SCD5 (1 of 2)     | oxidation-reduction process, fatty acid biosynthetic process, lipid metabolic process, membrane, endoplasmic reticulum, iron ion binding, oxidoreductase activity, stearoyl-CoA 9-desaturase activity                  |
| groupV   | 841568   | 890568   | Us | psL | ENSGACG00000002420 | NDUFB8            | -                                                                                                                                                                                                                      |
| groupV   | 841568   | 890568   | Us | psL | ENSGACG00000002427 | -                 | oxidation-reduction process, response to oxidative stress, glutathione peroxidase activity                                                                                                                             |
| groupV   | 841568   | 890568   | Us | psL | ENSGACG00000002428 | FBXL15            | dorsal/ventral pattern formation, protein binding, protein binding                                                                                                                                                     |
| groupV   | 841568   | 890568   | Us | psL | ENSGACG00000002414 | SEC31B            | protein binding                                                                                                                                                                                                        |
| groupV   | 4280394  | 4355314  | Us | n   | ENSGACG00000003772 | ORMDL3            | negative regulation of translation, integral to membrane, rRNA N-glycosylase activity                                                                                                                                  |
| groupV   | 4280394  | 4355314  | Us | n   | ENSGACG00000003779 | WNT3              | multicellular organismal development, Wnt receptor signaling pathway, calcium modulating pathway, extracellular region                                                                                                 |
| groupV   | 4280394  | 4355314  | Us | n   | ENSGACG00000003786 | NSF (2 of 2)      | ATP binding, binding, nucleotide binding, nucleoside-triphosphatase activity                                                                                                                                           |
| groupV   | 4456555  | 4498330  | Us | -   | ENSGACG00000003822 | TBKBP1 (1 of 2)   | -                                                                                                                                                                                                                      |
| groupV   | 4722030  | 4788030  | Us | n   | ENSGACG00000004095 | NDEL1 (1 of 2)    | -                                                                                                                                                                                                                      |
| groupV   | 4722030  | 4788030  | Us | n   | ENSGACG00000004117 | ARMC7             | binding, protein binding                                                                                                                                                                                               |
| groupV   | 4722030  | 4788030  | Us | n   | ENSGACG00000004134 | CHAD              | protein binding                                                                                                                                                                                                        |
| groupV   | 4722030  | 4788030  | Us | n   | ENSGACG00000004081 | ARHGAP44 (1 of 2) | signal transduction, intracellular, cytoplasm, protein binding                                                                                                                                                         |
| groupV   | 4722030  | 4788030  | Us | n   | ENSGACG00000004091 | C7orf62           | -                                                                                                                                                                                                                      |
| groupV   | 4722030  | 4788030  | Us | n   | ENSGACG00000004121 | ACSF2 (1 of 2)    | metabolic process, catalytic activity                                                                                                                                                                                  |
| groupV   | 4722030  | 4788030  | Us | n   | ENSGACG00000004139 | -                 | transport, transmembrane transport, integral to membrane, ATP binding, nucleotide binding, ATPase activity, ATPase activity, coupled to transmembrane movement of substances, nucleoside-triphosphatase activity       |
| groupVI  | 5707587  | 5735587  | Us | bg  | -                  | -                 | -                                                                                                                                                                                                                      |
| groupVI  | 7679742  | 7726724  | Us | psL | ENSGACG00000006266 | BMP5              | growth, growth factor activity                                                                                                                                                                                         |
| groupVI  | 7679742  | 7726724  | Us | psL | ENSGACG00000006193 | DST               | signal transduction, cell cycle arrest, membrane, cytoskeleton, signal transducer activity, calcium ion binding, actin binding, protein binding                                                                        |
| groupVI  | 7679742  | 7726724  | Us | psL | ENSGACG00000006250 | -                 | cell adhesion, protein binding, structural molecule activity                                                                                                                                                           |
| groupVII | 6251601  | 6281614  | Us | bg  | -                  | -                 | -                                                                                                                                                                                                                      |
| groupVII | 7475266  | 7500887  | Us | n   | ENSGACG00000019747 | SNX15             | cell communication, phosphatidylinositol binding, protein binding                                                                                                                                                      |
| groupVII | 7475266  | 7500887  | Us | n   | ENSGACG00000019750 | -                 | regulation of transcription, DNA-dependent, multicellular organismal development, lymphangiogenesis, nucleus, DNA binding, protein binding                                                                             |

|          |          |          |    |     |                    |                 |                                                                                                                                                                                                                                                                                                        |
|----------|----------|----------|----|-----|--------------------|-----------------|--------------------------------------------------------------------------------------------------------------------------------------------------------------------------------------------------------------------------------------------------------------------------------------------------------|
| groupVII | 7475266  | 7500887  | Us | n   | ENSGACG00000019751 | TMEM179B        | -                                                                                                                                                                                                                                                                                                      |
| groupVII | 7475266  | 7500887  | Us | n   | ENSGACG00000019753 | BRMS1           | -                                                                                                                                                                                                                                                                                                      |
| groupVII | 7557638  | 7606333  | Us | bg  | ENSGACG00000019763 | -               | -                                                                                                                                                                                                                                                                                                      |
| groupVII | 7557638  | 7606333  | Us | bg  | ENSGACG00000019760 | PLCB3           | signal transduction, intracellular signal transduction, lipid metabolic process, embryonic viscerocranium morphogenesis, cartilage morphogenesis, calcium ion binding, protein binding, phospholipase C activity, phosphatidylinositol phospholipase C activity, phosphoric diester hydrolase activity |
| groupVII | 7557638  | 7606333  | Us | bg  | ENSGACG00000019764 | -               | cell communication, calcium ion transport, transmembrane transport, carbon fixation, membrane, integral to membrane, plastid, magnesium ion binding, ribulose-bisphosphate carboxylase activity, calcium:sodium antiporter activity                                                                    |
| groupVII | 7707929  | 7759915  | Us | psR | ENSGACG00000019812 | ARL2            | small GTPase mediated signal transduction, intracellular protein transport, protein transport, intracellular, GTP binding                                                                                                                                                                              |
| groupVII | 7707929  | 7759915  | Us | psR | ENSGACG00000022730 | -               | -                                                                                                                                                                                                                                                                                                      |
| groupVII | 7707929  | 7759915  | Us | psR | ENSGACG00000022390 | -               | -                                                                                                                                                                                                                                                                                                      |
| groupVII | 7707929  | 7759915  | Us | psR | ENSGACG00000022786 | -               | -                                                                                                                                                                                                                                                                                                      |
| groupVII | 7707929  | 7759915  | Us | psR | ENSGACG00000022650 | -               | -                                                                                                                                                                                                                                                                                                      |
| groupVII | 7707929  | 7759915  | Us | psR | ENSGACG00000022602 | -               | -                                                                                                                                                                                                                                                                                                      |
| groupVII | 7707929  | 7759915  | Us | psR | ENSGACG00000022446 | -               | -                                                                                                                                                                                                                                                                                                      |
| groupVII | 7707929  | 7759915  | Us | psR | ENSGACG00000022711 | -               | -                                                                                                                                                                                                                                                                                                      |
| groupVII | 7707929  | 7759915  | Us | psR | ENSGACG00000019819 | -               | -                                                                                                                                                                                                                                                                                                      |
| groupVII | 7707929  | 7759915  | Us | psR | ENSGACG00000022330 | -               | -                                                                                                                                                                                                                                                                                                      |
| groupVII | 7707929  | 7759915  | Us | psR | ENSGACG00000022420 | -               | -                                                                                                                                                                                                                                                                                                      |
| groupVII | 7707929  | 7759915  | Us | psR | ENSGACG00000022678 | -               | -                                                                                                                                                                                                                                                                                                      |
| groupVII | 7707929  | 7759915  | Us | psR | ENSGACG00000022377 | -               | -                                                                                                                                                                                                                                                                                                      |
| groupVII | 7707929  | 7759915  | Us | psR | ENSGACG00000022735 | -               | -                                                                                                                                                                                                                                                                                                      |
| groupVII | 7707929  | 7759915  | Us | psR | ENSGACG00000019824 | B3GAT3          | membrane, galactosylgalactosylxylosylprotein 3-beta-glucuronosyltransferase activity                                                                                                                                                                                                                   |
| groupVII | 7707929  | 7759915  | Us | psR | ENSGACG00000019803 | PPP2R5B         | signal transduction, protein phosphatase type 2A complex, binding, protein phosphatase type 2A regulator activity                                                                                                                                                                                      |
| groupVII | 7903927  | 7940621  | Us | psL | ENSGACG00000019877 | C2orf65         | -                                                                                                                                                                                                                                                                                                      |
| groupVII | 8088936  | 8224090  | Us | psL | ENSGACG00000019896 | RPGRIP1         | protein binding                                                                                                                                                                                                                                                                                        |
| groupVII | 8088936  | 8224090  | Us | psL | ENSGACG00000019900 | PCED1A          | -                                                                                                                                                                                                                                                                                                      |
| groupVII | 8088936  | 8224090  | Us | psL | ENSGACG00000019913 | TDRD7 (1 of 2)  | nucleic acid binding                                                                                                                                                                                                                                                                                   |
| groupVII | 8088936  | 8224090  | Us | psL | ENSGACG00000019917 | CABP4 (2 of 2)  | calcium ion binding                                                                                                                                                                                                                                                                                    |
| groupVII | 8088936  | 8224090  | Us | psL | ENSGACG00000019919 | TMEM88 (1 of 2) | -                                                                                                                                                                                                                                                                                                      |
| groupVII | 8088936  | 8224090  | Us | psL | ENSGACG00000019920 | KDM6B (1 of 2)  | protein binding                                                                                                                                                                                                                                                                                        |
| groupVII | 8088936  | 8224090  | Us | psL | ENSGACG00000019921 | -               | -                                                                                                                                                                                                                                                                                                      |
| groupVII | 8088936  | 8224090  | Us | psL | ENSGACG00000019895 | -               | protein ubiquitination, intracellular, ubiquitin ligase complex, zinc ion binding, protein binding, ubiquitin-protein ligase activity                                                                                                                                                                  |
| groupVII | 8088936  | 8224090  | Us | psL | ENSGACG00000019902 | -               | signal transduction, neuron fate commitment, retina morphogenesis in camera-type eye, establishment of nucleus localization, apical protein localization, retina layer formation, camera-type eye photoreceptor cell differentiation, intracellular                                                    |
| groupVII | 8274759  | 8315759  | Us | -   | -                  | -               | -                                                                                                                                                                                                                                                                                                      |
| groupVII | 10103089 | 10126089 | Us | psR | ENSGACG00000020030 | NRXN2 (2 of 3)  | calcium ion binding, protein binding                                                                                                                                                                                                                                                                   |
| groupVII | 11932580 | 11954842 | Us | bg  | ENSGACG00000020129 | -               | protein binding, phosphotransferase activity, alcohol group as acceptor                                                                                                                                                                                                                                |
| groupVII | 12481549 | 12555549 | Us | bg  | ENSGACG00000020160 | SKA2L           | -                                                                                                                                                                                                                                                                                                      |
| groupVII | 12481549 | 12555549 | Us | bg  | ENSGACG00000021295 | -               | -                                                                                                                                                                                                                                                                                                      |
| groupVII | 12481549 | 12555549 | Us | bg  | ENSGACG00000021437 | -               | -                                                                                                                                                                                                                                                                                                      |
| groupVII | 12481549 | 12555549 | Us | bg  | ENSGACG00000020161 | TIPRL           | -                                                                                                                                                                                                                                                                                                      |
| groupVII | 12481549 | 12555549 | Us | bg  | ENSGACG00000020158 | SIM2            | regulation of transcription, DNA-dependent, signal transduction, nucleus, signal transducer activity, protein binding                                                                                                                                                                                  |
| groupVII | 12481549 | 12555549 | Us | bg  | ENSGACG00000020159 | HLCS            | cellular protein modification process, catalytic activity, biotin-[acetyl-CoA-carboxylase] ligase activity, cellular protein modification process, catalytic activity, biotin-[acetyl-CoA-carboxylase] ligase activity                                                                                 |
| groupVII | 12919373 | 13023652 | Us | n   | ENSGACG00000020183 | JAM3 (1 of 2)   | protein binding                                                                                                                                                                                                                                                                                        |
| groupVII | 12919373 | 13023652 | Us | n   | ENSGACG00000020184 | IGSF9B (2 of 4) | -                                                                                                                                                                                                                                                                                                      |
| groupVII | 12919373 | 13023652 | Us | n   | ENSGACG00000020185 | IGSF9B (1 of 4) | protein binding, protein binding                                                                                                                                                                                                                                                                       |

|          |          |          |    |     |                    |                 |                                                                                                                                                                                                                                                                                                                                                                                                                                                                       |
|----------|----------|----------|----|-----|--------------------|-----------------|-----------------------------------------------------------------------------------------------------------------------------------------------------------------------------------------------------------------------------------------------------------------------------------------------------------------------------------------------------------------------------------------------------------------------------------------------------------------------|
| groupVII | 13184192 | 13506953 | Us | n   | ENSGACG00000020189 | IGSF5 (1 of 2)  | protein binding                                                                                                                                                                                                                                                                                                                                                                                                                                                       |
| groupVII | 13184192 | 13506953 | Us | n   | ENSGACG00000020190 | -               | transport, transmembrane transport, integral to membrane, transporter activity, transport, transmembrane transport, integral to membrane, transporter activity                                                                                                                                                                                                                                                                                                        |
| groupVII | 13184192 | 13506953 | Us | n   | ENSGACG00000020194 | PRKRIR (2 of 3) | nucleic acid binding                                                                                                                                                                                                                                                                                                                                                                                                                                                  |
| groupVII | 13184192 | 13506953 | Us | n   | ENSGACG00000020198 | DGAT2           | protein binding, transferase activity, transferring acyl groups other than amino-acyl groups                                                                                                                                                                                                                                                                                                                                                                          |
| groupVII | 13184192 | 13506953 | Us | n   | ENSGACG00000020200 | MAP6 (1 of 2)   | -                                                                                                                                                                                                                                                                                                                                                                                                                                                                     |
| groupVII | 13184192 | 13506953 | Us | n   | ENSGACG00000020201 | UMODL1          | -                                                                                                                                                                                                                                                                                                                                                                                                                                                                     |
| groupVII | 13184192 | 13506953 | Us | n   | ENSGACG00000020202 | ZNF295          | intracellular, DNA binding, zinc ion binding, protein binding, intracellular, DNA binding, zinc ion binding, protein binding                                                                                                                                                                                                                                                                                                                                          |
| groupVII | 13184192 | 13506953 | Us | n   | ENSGACG00000020191 | -               | membrane, galactosylgalactosylxylosylprotein 3-beta-glucuronosyltransferase activity                                                                                                                                                                                                                                                                                                                                                                                  |
| groupVII | 13184192 | 13506953 | Us | n   | ENSGACG00000020192 | -               | carbohydrate metabolic process, beta-galactosidase complex, hydrolase activity, hydrolyzing O-glycosyl compounds, beta-galactosidase activity                                                                                                                                                                                                                                                                                                                         |
| groupVII | 13184192 | 13506953 | Us | n   | ENSGACG00000020193 | STT3A           | protein glycosylation, membrane, oligosaccharyl transferase activity, protein glycosylation, membrane, oligosaccharyl transferase activity                                                                                                                                                                                                                                                                                                                            |
| groupVII | 13184192 | 13506953 | Us | n   | ENSGACG00000020195 | PRKRIR (3 of 3) | nucleic acid binding                                                                                                                                                                                                                                                                                                                                                                                                                                                  |
| groupVII | 13184192 | 13506953 | Us | n   | ENSGACG00000020196 | WNT11           | multicellular organismal development, Wnt receptor signaling pathway, calcium modulating pathway, cell migration involved in gastrulation, heart development, extracellular region                                                                                                                                                                                                                                                                                    |
| groupVII | 13184192 | 13506953 | Us | n   | ENSGACG00000020197 | UVRAG           | protein binding                                                                                                                                                                                                                                                                                                                                                                                                                                                       |
| groupVII | 13184192 | 13506953 | Us | n   | ENSGACG00000020199 | MOGAT2          | protein binding, transferase activity, transferring acyl groups other than amino-acyl groups                                                                                                                                                                                                                                                                                                                                                                          |
| groupVII | 13622945 | 13639945 | Us | psL | ENSGACG00000020210 | -               | -                                                                                                                                                                                                                                                                                                                                                                                                                                                                     |
| groupVII | 14206861 | 14253284 | Us | n   | ENSGACG00000020217 | ATP5L2          | ATP synthesis coupled proton transport, mitochondrial proton-transporting ATP synthase complex, coupling factor F(o), hydrogen ion transmembrane transporter activity                                                                                                                                                                                                                                                                                                 |
| groupVII | 14206861 | 14253284 | Us | n   | ENSGACG00000020218 | -               | vesicle-mediated transport, membrane, intracellular, zinc ion binding, protein binding                                                                                                                                                                                                                                                                                                                                                                                |
| groupVII | 14206861 | 14253284 | Us | n   | ENSGACG00000020220 | RUVBL2          | ATP binding, nucleotide binding, DNA helicase activity, nucleoside-triphosphatase activity, ATP catabolic process, regulation of heart growth, negative regulation of transcription, DNA-dependent, heart development, digestive tract development, ATP binding, nucleotide binding, DNA helicase activity, nucleoside-triphosphatase activity, ATPase activity                                                                                                       |
| groupVII | 14206861 | 14253284 | Us | n   | ENSGACG00000020216 | CLTC            | intracellular protein transport, vesicle-mediated transport, clathrin coat of trans-Golgi network vesicle, clathrin coat of coated pit, binding, structural molecule activity                                                                                                                                                                                                                                                                                         |
| groupVII | 14206861 | 14253284 | Us | n   | ENSGACG00000020219 | -               | intracellular, zinc ion binding, protein binding, protein binding                                                                                                                                                                                             |
| groupVII | 14720025 | 14776561 | Us | psL | -                  | -               | -                                                                                                                                                                                                                                                                                                                                                                                                                                                                     |
| groupVII | 14849644 | 14907551 | Us | n   | ENSGACG00000020242 | -               | -                                                                                                                                                                                                                                                                                                                                                                                                                                                                     |
| groupVII | 14849644 | 14907551 | Us | n   | ENSGACG00000020243 | -               | -                                                                                                                                                                                                                                                                                                                                                                                                                                                                     |
| groupVII | 14849644 | 14907551 | Us | n   | ENSGACG00000020244 | ZNHIT3          | -                                                                                                                                                                                                                                                                                                                                                                                                                                                                     |
| groupVII | 14849644 | 14907551 | Us | n   | ENSGACG00000020246 | PIGW            | GPI anchor biosynthetic process, integral to membrane, endoplasmic reticulum membrane, transferase activity, transferring acyl groups                                                                                                                                                                                                                                                                                                                                 |
| groupVII | 14849644 | 14907551 | Us | n   | ENSGACG00000020248 | DHRS11          | metabolic process, oxidoreductase activity                                                                                                                                                                                                                                                                                                                                                                                                                            |
| groupVII | 14849644 | 14907551 | Us | n   | ENSGACG00000020241 | GUSB            | carbohydrate metabolic process, hydrolase activity, hydrolyzing O-glycosyl compounds, carbohydrate metabolic process, hydrolase activity, hydrolyzing O-glycosyl compounds, carbohydrate metabolic process, hydrolase activity, hydrolyzing O-glycosyl compounds                                                                                                                                                                                                      |
| groupVII | 14849644 | 14907551 | Us | n   | ENSGACG00000020245 | MYO19           | myosin complex, motor activity, ATP binding, nucleotide binding, protein binding, nucleoside-triphosphatase activity                                                                                                                                                                                                                                                                                                                                                  |
| groupVII | 14849644 | 14907551 | Us | n   | ENSGACG00000020247 | GGNBP2          | -                                                                                                                                                                                                                                                                                                                                                                                                                                                                     |
| groupVII | 17035259 | 17069410 | Us | psR | ENSGACG00000020328 | TBC1D8B         | -                                                                                                                                                                                                                                                                                                                                                                                                                                                                     |
| groupVII | 17035259 | 17069410 | Us | psR | ENSGACG00000020327 | AIFM1           | oxidation-reduction process, oxidoreductase activity, flavin adenine dinucleotide binding, oxidation-reduction process, oxidoreductase activity, flavin adenine dinucleotide binding |
| groupVII | 17035259 | 17069410 | Us | psR | ENSGACG00000020326 | GLRA4 (2 of 2)  | transport, ion transport, membrane, integral to membrane, postsynaptic membrane, extracellular ligand-gated ion channel activity, transport, ion transport, membrane, integral to membrane, postsynaptic membrane, extracellular ligand-gated ion channel activity                                                                                                                                                                                                    |
| groupVII | 17183496 | 17221578 | Us | bg  | ENSGACG00000020335 | FAM123B         | -                                                                                                                                                                                                                                                                                                                                                                                                                                                                     |



|          |          |          |    |     |                    |                  |                                                                                                                                                                                                                                       |
|----------|----------|----------|----|-----|--------------------|------------------|---------------------------------------------------------------------------------------------------------------------------------------------------------------------------------------------------------------------------------------|
| groupVII | 17183496 | 17221578 | Us | bg  | ENSGACG00000020336 | -                | protein binding                                                                                                                                                                                                                       |
| groupVII | 17183496 | 17221578 | Us | bg  | ENSGACG00000020338 | NPAS2            | photoperiodism, response to light stimulus, circadian rhythm, double-stranded DNA binding                                                                                                                                             |
| groupVII | 17183496 | 17221578 | Us | bg  | ENSGACG00000020337 | CXorf57          | -                                                                                                                                                                                                                                     |
| groupVII | 17329821 | 17346821 | Us | psL | ENSGACG00000020350 | RTN2 (2 of 2)    | endoplasmic reticulum                                                                                                                                                                                                                 |
| groupVII | 17329821 | 17346821 | Us | psL | ENSGACG00000020351 | PVRL3 (2 of 2)   | protein binding, protein binding                                                                                                                                                                                                      |
| groupVII | 17403453 | 17488609 | Us | psL | ENSGACG00000020359 | PAFAH1B2         | lipid metabolic process, hydrolase activity, acting on ester bonds                                                                                                                                                                    |
| groupVII | 17403453 | 17488609 | Us | psL | ENSGACG00000020360 | MPZL2 (2 of 2)   | protein binding, identical protein binding                                                                                                                                                                                            |
| groupVII | 17403453 | 17488609 | Us | psL | ENSGACG00000020357 | -                | cell communication, connexon complex                                                                                                                                                                                                  |
| groupVII | 17403453 | 17488609 | Us | psL | ENSGACG00000020358 | TAGLN (2 of 2)   | cell morphogenesis, actin cytoskeleton organization, actin cytoskeleton, protein binding, protein binding                                                                                                                             |
| groupVII | 17403453 | 17488609 | Us | psL | ENSGACG00000020361 | SCN4B (2 of 2)   | protein binding                                                                                                                                                                                                                       |
| groupVII | 17403453 | 17488609 | Us | psL | ENSGACG00000020362 | DSCAML1 (1 of 2) | proteolysis, homophilic cell adhesion, membrane, calcium ion binding, zinc ion binding, protein binding, metalloproteinase activity                                                                                                   |
| groupVII | 17667176 | 17698176 | Us | bg  | ENSGACG00000020371 | PLP1 (2 of 2)    | integral to membrane, integral to membrane, integral to membrane                                                                                                                                                                      |
| groupVII | 17667176 | 17698176 | Us | bg  | ENSGACG00000020372 | -                | -                                                                                                                                                                                                                                     |
| groupVII | 17667176 | 17698176 | Us | bg  | ENSGACG00000020373 | -                | nucleic acid binding, DNA binding, protein binding                                                                                                                                                                                    |
| groupVII | 17667176 | 17698176 | Us | bg  | ENSGACG00000020374 | -                | nuclear mRNA splicing, via spliceosome, spliceosomal complex                                                                                                                                                                          |
| groupVII | 17667176 | 17698176 | Us | bg  | ENSGACG00000020370 | NLGN3 (2 of 2)   | -                                                                                                                                                                                                                                     |
| groupVII | 17667176 | 17698176 | Us | bg  | ENSGACG00000020375 | MTMR2            | dephosphorylation, ATP binding, protein tyrosine phosphatase activity, phosphatase activity                                                                                                                                           |
| groupVII | 18497880 | 18543915 | Us | psL | ENSGACG00000020433 | SLC9A6 (2 of 2)  | sodium ion transport, transmembrane transport, cation transport, regulation of pH, integral to membrane, sodium:hydrogen antiporter activity, solute:hydrogen antiporter activity                                                     |
| groupVII | 18497880 | 18543915 | Us | psL | ENSGACG00000020431 | GPR112 (2 of 2)  | G-protein coupled receptor signaling pathway, cell surface receptor signaling pathway, neuropeptide signaling pathway, membrane, integral to membrane, G-protein coupled receptor activity, transmembrane signaling receptor activity |
| groupVII | 18497880 | 18543915 | Us | psL | ENSGACG00000020432 | FHL1 (2 of 2)    | intracellular, zinc ion binding, intracellular, zinc ion binding                                                                                                                                                                      |
| groupVII | 18602309 | 18667488 | Us | n   | ENSGACG00000020442 | CD248 (2 of 2)   | binding                                                                                                                                                                                                                               |
| groupVII | 18602309 | 18667488 | Us | n   | ENSGACG00000020443 | RCE1 (2 of 2)    | membrane                                                                                                                                                                                                                              |
| groupVII | 18602309 | 18667488 | Us | n   | ENSGACG00000020439 | -                | protein binding, phospholipid binding                                                                                                                                                                                                 |
| groupVII | 18602309 | 18667488 | Us | n   | ENSGACG00000020441 | DPP3             | proteolysis, cytoplasm, dipeptidyl-peptidase activity                                                                                                                                                                                 |
| groupVII | 18602309 | 18667488 | Us | n   | ENSGACG00000020444 | EHBP1L1 (2 of 2) | protein binding,                                                                                                                                                                                                                      |
| groupVII | 18602309 | 18667488 | Us | n   | ENSGACG00000020440 | RBM14 (2 of 2)   | nucleic acid binding                                                                                                                                                                                                                  |
| groupVII | 18745383 | 18824089 | Us | bg  | ENSGACG00000020453 | ADRB2 (2 of 2)   | G-protein coupled receptor signaling pathway, integral to membrane                                                                                                                                                                    |
| groupVII | 18745383 | 18824089 | Us | bg  | ENSGACG00000020455 | IL12B (2 of 3)   | -                                                                                                                                                                                                                                     |
| groupVII | 18745383 | 18824089 | Us | bg  | ENSGACG00000020456 | UBLCP1           | nucleus, phosphoprotein phosphatase activity, protein binding                                                                                                                                                                         |
| groupVII | 18745383 | 18824089 | Us | bg  | ENSGACG00000020457 | RNF145           | zinc ion binding, protein binding                                                                                                                                                                                                     |
| groupVII | 18745383 | 18824089 | Us | bg  | ENSGACG00000020454 | UBTD2            | protein binding                                                                                                                                                                                                                       |
| groupVII | 18745383 | 18824089 | Us | bg  | ENSGACG00000020452 | ABLIM3 (2 of 2)  | cytoskeleton organization, zinc ion binding, actin binding                                                                                                                                                                            |
| groupVII | 18745383 | 18824089 | Us | bg  | ENSGACG00000020458 | EBF1 (1 of 2)    | regulation of transcription, DNA-dependent, protein binding                                                                                                                                                                           |
| groupVII | 18937368 | 19046723 | Us | psL | ENSGACG00000020460 | BOD1             | -                                                                                                                                                                                                                                     |
| groupVII | 18937368 | 19046723 | Us | psL | ENSGACG00000020461 | BNIP1 (2 of 2)   | -                                                                                                                                                                                                                                     |
| groupVII | 18937368 | 19046723 | Us | psL | ENSGACG00000020462 | CREBRF           | -                                                                                                                                                                                                                                     |
| groupVII | 18937368 | 19046723 | Us | psL | ENSGACG00000020463 | PCYOX1L          | oxidation-reduction process, prenylcysteine catabolic process, oxidoreductase activity, oxidoreductase activity, acting on a sulfur group of donors, oxygen as acceptor                                                               |
| groupVII | 18937368 | 19046723 | Us | psL | ENSGACG00000020466 | -                | G-protein coupled receptor signaling pathway, visual perception, integral to membrane, G-protein coupled receptor signaling pathway, visual perception, integral to membrane                                                          |
| groupVII | 18937368 | 19046723 | Us | psL | ENSGACG00000020467 | -                | metabolic process, protein-tyrosine sulfotransferase activity,                                                                                                                                                                        |
| groupVII | 18937368 | 19046723 | Us | psL | ENSGACG00000020468 | CRCP             | cellular metabolic process, catalytic activity, nucleotide binding                                                                                                                                                                    |
| groupVII | 18937368 | 19046723 | Us | psL | ENSGACG00000020469 | -                | catalytic activity                                                                                                                                                                                                                    |
| groupVII | 18937368 | 19046723 | Us | psL | ENSGACG00000020459 | HTATSF1          | nucleic acid binding                                                                                                                                                                                                                  |
| groupVII | 18937368 | 19046723 | Us | psL | ENSGACG00000020464 | TCERG1           | protein binding, protein binding                                                                                                                                                                                                      |

|          |          |          |    |     |                    |                  |                                                                                                                                                                                                                                                                                                                                                                                  |
|----------|----------|----------|----|-----|--------------------|------------------|----------------------------------------------------------------------------------------------------------------------------------------------------------------------------------------------------------------------------------------------------------------------------------------------------------------------------------------------------------------------------------|
| groupVII | 18937368 | 19046723 | Us | psL | ENSGACG00000020470 | ASL              | arginine biosynthetic process via ornithine, catalytic activity, argininosuccinate lyase activity, arginine biosynthetic process via ornithine, catalytic activity, argininosuccinate lyase activity, arginine biosynthetic process via ornithine, catalytic activity, argininosuccinate lyase activity                                                                          |
| groupVII | 18937368 | 19046723 | Us | psL | ENSGACG00000020465 | CLINT1 (1 of 2)  | -                                                                                                                                                                                                                                                                                                                                                                                |
| groupVII | 19053891 | 19098891 | Us | psR | ENSGACG00000020472 | -                | oxidation-reduction process, metabolic process, oxidoreductase activity, oxidation-reduction process, metabolic process, oxidoreductase activity                                                                                                                                                                                                                                 |
| groupVII | 19053891 | 19098891 | Us | psR | ENSGACG00000020474 | SLC13A2 (2 of 2) | sodium ion transport, transmembrane transport, membrane, transporter activity                                                                                                                                                                                                                                                                                                    |
| groupVII | 19053891 | 19098891 | Us | psR | ENSGACG00000020476 | -                | -                                                                                                                                                                                                                                                                                                                                                                                |
| groupVII | 19053891 | 19098891 | Us | psR | ENSGACG00000020473 | -                | immune response, scavenger receptor activity, polysaccharide binding, immune response, scavenger receptor activity, polysaccharide binding                                                                                                                                                                                                                                       |
| groupVII | 19053891 | 19098891 | Us | psR | ENSGACG00000020475 | UNC119 (1 of 2)  | -                                                                                                                                                                                                                                                                                                                                                                                |
| groupVII | 19242686 | 19285534 | Us | psL | ENSGACG00000020493 | GBAS (2 of 2)    | metabolic process, transferase activity, folic acid binding                                                                                                                                                                                                                                                                                                                      |
| groupVII | 19242686 | 19285534 | Us | psL | ENSGACG00000020494 | CCT6A            | protein folding, cellular protein metabolic process, ATP binding, unfolded protein binding, protein folding, cellular protein metabolic process, ATP binding, unfolded protein binding                                                                                                                                                                                           |
| groupVII | 19242686 | 19285534 | Us | psL | ENSGACG00000022599 | -                | -                                                                                                                                                                                                                                                                                                                                                                                |
| groupVII | 19242686 | 19285534 | Us | psL | ENSGACG00000022586 | -                | -                                                                                                                                                                                                                                                                                                                                                                                |
| groupVII | 19242686 | 19285534 | Us | psL | ENSGACG00000022642 | -                | -                                                                                                                                                                                                                                                                                                                                                                                |
| groupVII | 19242686 | 19285534 | Us | psL | ENSGACG00000020495 | SUMF2            | binding                                                                                                                                                                                                                                                                                                                                                                          |
| groupVII | 19242686 | 19285534 | Us | psL | ENSGACG00000020496 | -                | -                                                                                                                                                                                                                                                                                                                                                                                |
| groupVII | 19242686 | 19285534 | Us | psL | ENSGACG00000020497 | ABHD11           | intracellular protein transport, GPI anchor metabolic process, intrinsic to endoplasmic reticulum membrane, hydrolase activity, acting on ester bonds                                                                                                                                                                                                                            |
| groupVII | 19242686 | 19285534 | Us | psL | ENSGACG00000020498 | -                | membrane, tight junction, structural molecule activity                                                                                                                                                                                                                                                                                                                           |
| groupVII | 19242686 | 19285534 | Us | psL | ENSGACG00000020499 | -                | membrane, tight junction, structural molecule activity                                                                                                                                                                                                                                                                                                                           |
| groupVII | 20218240 | 20333240 | Us | n   | ENSGACG00000020565 | FAM48A           | -                                                                                                                                                                                                                                                                                                                                                                                |
| groupVII | 20218240 | 20333240 | Us | n   | ENSGACG00000020564 | EXOSC8           | RNA processing, RNA binding                                                                                                                                                                                                                                                                                                                                                      |
| groupVII | 20218240 | 20333240 | Us | n   | ENSGACG00000020566 | -                | metabolic process, transferase activity, transferring hexosyl groups                                                                                                                                                                                                                                                                                                             |
| groupVII | 20218240 | 20333240 | Us | n   | ENSGACG00000020567 | POSTN (2 of 2)   | protein binding,                                                                                                                                                                                                                                                                                                                                                                 |
| groupVII | 20218240 | 20333240 | Us | n   | ENSGACG00000020568 | TRPC4 (1 of 2)   | ion transport, transmembrane transport, translation, membrane, integral to membrane, intracellular, ribosome, protein binding, structural constituent of ribosome, ion channel activity, ion transport, transmembrane transport, translation, membrane, integral to membrane, intracellular, ribosome, protein binding, structural constituent of ribosome, ion channel activity |
| groupVII | 20218240 | 20333240 | Us | n   | ENSGACG00000020569 | FREM2 (2 of 2)   | cell communication, homophilic cell adhesion, membrane, integral to membrane, calcium ion binding, cell communication, homophilic cell adhesion, membrane, integral to membrane, calcium ion binding                                                                                                                                                                             |
| groupVII | 20409809 | 20461876 | Us | n   | ENSGACG00000020572 | ARFIP2 (1 of 2)  | -                                                                                                                                                                                                                                                                                                                                                                                |
| groupVII | 20409809 | 20461876 | Us | n   | ENSGACG00000020573 | DCHS1 (2 of 2)   | cell adhesion, homophilic cell adhesion, membrane, plasma membrane, calcium ion binding, cell adhesion, homophilic cell adhesion, membrane, plasma membrane, calcium ion binding                                                                                                                                                                                                 |
| groupVII | 21391936 | 21524060 | Us | n   | ENSGACG00000020612 | -                | transmembrane transport, drug transmembrane transport, membrane, drug transmembrane transporter activity, antiporter activity, transmembrane transport, drug transmembrane transport, membrane, drug transmembrane transporter activity, antiporter activity                                                                                                                     |
| groupVII | 21391936 | 21524060 | Us | n   | ENSGACG00000020613 | -                | transmembrane transport, drug transmembrane transport, membrane, drug transmembrane transporter activity, antiporter activity, transmembrane transport, drug transmembrane transport, membrane, drug transmembrane transporter activity, antiporter activity                                                                                                                     |
| groupVII | 21391936 | 21524060 | Us | n   | ENSGACG00000020617 | CCT8             | protein folding, cellular protein metabolic process, ATP binding, unfolded protein binding, protein folding, cellular protein metabolic process, ATP binding, unfolded protein binding, protein folding, cellular protein metabolic process, behavioral response to nicotine, ATP binding, unfolded protein binding                                                              |
| groupVII | 21391936 | 21524060 | Us | n   | ENSGACG00000020619 | -                | glycolysis, fructose-bisphosphate aldolase activity                                                                                                                                                                                                                                                                                                                              |
| groupVII | 21391936 | 21524060 | Us | n   | ENSGACG00000020614 | -                | transmembrane transport, drug transmembrane transport, membrane, drug transmembrane transporter activity, antiporter activity                                                                                                                                                                                                                                                    |
| groupVII | 21391936 | 21524060 | Us | n   | ENSGACG00000020615 | -                | transmembrane transport, drug transmembrane transport, membrane, drug transmembrane transporter activity, antiporter activity                                                                                                                                                                                                                                                    |
| groupVII | 21391936 | 21524060 | Us | n   | ENSGACG00000020618 | -                | transferase activity, transferring phosphorus-containing groups                                                                                                                                                                                                                                                                                                                  |
| groupVII | 21391936 | 21524060 | Us | n   | ENSGACG00000020616 | TMIGD1           | protein binding                                                                                                                                                                                                                                                                                                                                                                  |

|           |          |          |    |     |                    |                  |                                                                                                                                                                                                                                                                      |
|-----------|----------|----------|----|-----|--------------------|------------------|----------------------------------------------------------------------------------------------------------------------------------------------------------------------------------------------------------------------------------------------------------------------|
| groupVII  | 21632504 | 21657126 | Us | n   | ENSGACG00000020635 | CHEK1            | protein phosphorylation, ATP binding, protein kinase activity, transferase activity, transferring phosphorus-containing groups, protein serine/threonine kinase activity                                                                                             |
| groupVII  | 21632504 | 21657126 | Us | n   | ENSGACG00000020637 | LAYN (1 of 2)    | binding                                                                                                                                                                                                                                                              |
| groupVII  | 21632504 | 21657126 | Us | n   | ENSGACG00000020636 | CFB              | proteolysis, complement activation, extracellular region, catalytic activity, protein binding, serine-type endopeptidase activity, proteolysis, complement activation, extracellular region, catalytic activity, protein binding, serine-type endopeptidase activity |
| groupVIII | 7922475  | 7989930  | Us | psL | ENSGACG00000007122 | RAVER2           | nucleic acid binding                                                                                                                                                                                                                                                 |
| groupVIII | 7922475  | 7989930  | Us | psL | ENSGACG00000007145 | JAK1             | protein phosphorylation, cytoskeleton, ATP binding, protein kinase activity, protein binding, transferase activity, transferring phosphorus-containing groups, protein serine/threonine kinase activity, protein tyrosine kinase activity                            |
| groupVIII | 8291548  | 8418958  | Us | n   | ENSGACG00000007306 | -                | -                                                                                                                                                                                                                                                                    |
| groupVIII | 8291548  | 8418958  | Us | n   | ENSGACG00000007278 | -                | extracellular region, protein binding, peptidase inhibitor activity                                                                                                                                                                                                  |
| groupVIII | 8291548  | 8418958  | Us | n   | ENSGACG00000007288 | IVNS1ABP         | protein binding                                                                                                                                                                                                                                                      |
| groupVIII | 8291548  | 8418958  | Us | n   | ENSGACG00000007270 | -                | -                                                                                                                                                                                                                                                                    |
| groupVIII | 8291548  | 8418958  | Us | n   | ENSGACG00000007309 | -                | fin development, fin morphogenesis, basement membrane organization, calcium ion binding, protein binding                                                                                                                                                             |
| groupVIII | 9769411  | 9784476  | Us | n   | ENSGACG00000008635 | NDUFA7           | ATP synthesis coupled electron transport, mitochondrial inner membrane, NADH dehydrogenase (ubiquinone) activity                                                                                                                                                     |
| groupVIII | 9769411  | 9784476  | Us | n   | ENSGACG00000008636 | -                | calcium ion binding, protein binding                                                                                                                                                                                                                                 |
| groupVIII | 9769411  | 9784476  | Us | n   | ENSGACG00000008622 | MAST3 (1 of 2)   | protein phosphorylation, ATP binding, protein kinase activity, protein binding, transferase activity, transferring phosphorus-containing groups, protein serine/threonine kinase activity                                                                            |
| groupVIII | 11068543 | 11177201 | Us | n   | -                  | -                | -                                                                                                                                                                                                                                                                    |
| groupVIII | 11301931 | 11362144 | Us | n   | ENSGACG00000009078 | -                | transport, ion transport, membrane, integral to membrane, postsynaptic membrane, extracellular ligand-gated ion channel activity                                                                                                                                     |
| groupVIII | 11301931 | 11362144 | Us | n   | ENSGACG00000009086 | KIAA0226         | zinc ion binding, protein binding                                                                                                                                                                                                                                    |
| groupVIII | 11301931 | 11362144 | Us | n   | ENSGACG00000009134 | TSC22D2 (2 of 2) | regulation of transcription, DNA-dependent, sequence-specific DNA binding transcription factor activity                                                                                                                                                              |
| groupVIII | 11846963 | 11881697 | Us | -   | -                  | -                | -                                                                                                                                                                                                                                                                    |
| groupVIII | 11883508 | 11928508 | Us | -   | ENSGACG00000009483 | NEGR1            | protein binding, identical protein binding                                                                                                                                                                                                                           |
| groupX    | 9017140  | 9067690  | Us | -   | ENSGACG00000022581 | -                | -                                                                                                                                                                                                                                                                    |
| groupX    | 9017140  | 9067690  | Us | -   | ENSGACG00000006358 | GRN              | -                                                                                                                                                                                                                                                                    |
| groupX    | 9017140  | 9067690  | Us | -   | ENSGACG00000006347 | FAM133B          | -                                                                                                                                                                                                                                                                    |
| groupX    | 9017140  | 9067690  | Us | -   | ENSGACG00000006364 | ANKRD28 (2 of 2) | protein binding                                                                                                                                                                                                                                                      |
| groupX    | 9017140  | 9067690  | Us | -   | ENSGACG00000006323 | CDK6             | protein phosphorylation, ATP binding, protein kinase activity, transferase activity, transferring phosphorus-containing groups, protein serine/threonine kinase activity                                                                                             |
| groupXI   | 5544301  | 5561301  | Us | -   | ENSGACG00000008517 | C1QL1 (1 of 2)   | protein binding                                                                                                                                                                                                                                                      |
| groupXI   | 6838319  | 6877319  | Us | n   | ENSGACG00000009540 | MPP3 (1 of 2)    | protein binding                                                                                                                                                                                                                                                      |
| groupXI   | 6838319  | 6877319  | Us | n   | ENSGACG00000009558 | ASIC2            | sodium ion transport, membrane, integral to membrane, sodium channel activity, ligand-gated sodium channel activity                                                                                                                                                  |
| groupXI   | 7074675  | 7103089  | Us | psR | ENSGACG00000009598 | UBTF             | DNA binding, protein binding                                                                                                                                                                                                                                         |
| groupXI   | 7074675  | 7103089  | Us | psR | ENSGACG00000009622 | SLC4A1 (2 of 2)  | transport, anion transport, embryonic hemopoiesis, erythrocyte differentiation, membrane, integral to membrane, transporter activity, inorganic anion exchanger activity, anion transmembrane transporter activity, protein binding                                  |
| groupXI   | 7074675  | 7103089  | Us | psR | ENSGACG00000009590 | -                | -                                                                                                                                                                                                                                                                    |
| groupXI   | 7827045  | 7868045  | Us | bg  | ENSGACG00000010121 | LPAR2 (2 of 2)   | G-protein coupled receptor signaling pathway, angiogenesis, integral to membrane                                                                                                                                                                                     |
| groupXI   | 7827045  | 7868045  | Us | bg  | ENSGACG00000010106 | BRD4             | condensed chromosome, nucleus, protein binding, histone binding                                                                                                                                                                                                      |
| groupXI   | 7827045  | 7868045  | Us | bg  | ENSGACG00000010133 | -                | regulation of transcription, DNA-dependent, nucleus, sequence-specific DNA binding transcription factor activity, sequence-specific DNA binding, protein binding                                                                                                     |
| groupXI   | 8365974  | 8386113  | Us | bg  | ENSGACG00000010630 | EPN3 (1 of 2)    | -                                                                                                                                                                                                                                                                    |
| groupXI   | 8365974  | 8386113  | Us | bg  | ENSGACG00000010637 | FN3K             | transferase activity, transferring phosphorus-containing groups                                                                                                                                                                                                      |
| groupXI   | 8365974  | 8386113  | Us | bg  | ENSGACG00000010661 | ZNF750           | -                                                                                                                                                                                                                                                                    |
| groupXI   | 8365974  | 8386113  | Us | bg  | ENSGACG00000010647 | TBCD             | binding, protein binding                                                                                                                                                                                                                                             |
| groupXI   | 9419098  | 9484098  | Us | psL | -                  | -                | -                                                                                                                                                                                                                                                                    |
| groupXI   | 10011875 | 10053875 | Us | psR | ENSGACG00000011350 | TRAP1            | response to stress, protein folding, ATP binding, unfolded protein binding                                                                                                                                                                                           |
| groupXI   | 10011875 | 10053875 | Us | psR | ENSGACG00000011359 | FAM195A (2 of 2) | -                                                                                                                                                                                                                                                                    |
| groupXI   | 10011875 | 10053875 | Us | psR | ENSGACG00000011339 | ADCY9 (2 of 2)   | intracellular signal transduction, cyclic nucleotide biosynthetic process, phosphorus-oxygen lyase activity                                                                                                                                                          |

|           |          |          |    |     |                    |                  |                                                                                                                                                                                                                                                                                                                                                                                                                                                                                                                                                                                                                                                                                                               |
|-----------|----------|----------|----|-----|--------------------|------------------|---------------------------------------------------------------------------------------------------------------------------------------------------------------------------------------------------------------------------------------------------------------------------------------------------------------------------------------------------------------------------------------------------------------------------------------------------------------------------------------------------------------------------------------------------------------------------------------------------------------------------------------------------------------------------------------------------------------|
| groupXI   | 10011875 | 10053875 | Us | psR | ENSGACG00000011341 | CREBBP (1 of 2)  | regulation of transcription, DNA-dependent, nucleus, transcription cofactor activity, zinc ion binding, protein binding, histone acetyltransferase activity, transcription coactivator activity                                                                                                                                                                                                                                                                                                                                                                                                                                                                                                               |
| groupXII  | 2156021  | 2285239  | Us | psR | ENSGACG00000003497 | -                | -                                                                                                                                                                                                                                                                                                                                                                                                                                                                                                                                                                                                                                                                                                             |
| groupXII  | 2156021  | 2285239  | Us | psR | ENSGACG00000003505 | -                | protein binding                                                                                                                                                                                                                                                                                                                                                                                                                                                                                                                                                                                                                                                                                               |
| groupXII  | 2156021  | 2285239  | Us | psR | ENSGACG00000003535 | OVGP1 (1 of 5)   | carbohydrate metabolic process, chitin catabolic process, chitin metabolic process, extracellular region, hydrolase activity, hydrolyzing O-glycosyl compounds, chitinase activity, chitin binding                                                                                                                                                                                                                                                                                                                                                                                                                                                                                                            |
| groupXII  | 2156021  | 2285239  | Us | psR | ENSGACG00000003565 | OVGP1 (4 of 5)   | carbohydrate metabolic process, chitin catabolic process, chitin metabolic process, extracellular region, hydrolase activity, hydrolyzing O-glycosyl compounds, chitinase activity, chitin binding                                                                                                                                                                                                                                                                                                                                                                                                                                                                                                            |
| groupXII  | 2156021  | 2285239  | Us | psR | ENSGACG00000003501 | -                | metabolic process, lipid metabolic process                                                                                                                                                                                                                                                                                                                                                                                                                                                                                                                                                                                                                                                                    |
| groupXII  | 2156021  | 2285239  | Us | psR | ENSGACG00000003580 | DENND2D          | -                                                                                                                                                                                                                                                                                                                                                                                                                                                                                                                                                                                                                                                                                                             |
| groupXII  | 2156021  | 2285239  | Us | psR | ENSGACG00000003596 | STK38            | protein phosphorylation, ATP binding, protein kinase activity, transferase activity, transferring phosphorus-containing groups, protein serine/threonine kinase activity                                                                                                                                                                                                                                                                                                                                                                                                                                                                                                                                      |
| groupXII  | 2156021  | 2285239  | Us | psR | ENSGACG00000003602 | MTCH1            | -                                                                                                                                                                                                                                                                                                                                                                                                                                                                                                                                                                                                                                                                                                             |
| groupXII  | 2285374  | 2600392  | Us | psL | ENSGACG00000003612 | -                | -                                                                                                                                                                                                                                                                                                                                                                                                                                                                                                                                                                                                                                                                                                             |
| groupXII  | 2285374  | 2600392  | Us | psL | ENSGACG00000003613 | STK35 (2 of 2)   | protein phosphorylation, ATP binding, protein kinase activity, transferase activity, transferring phosphorus-containing groups, protein serine/threonine kinase activity                                                                                                                                                                                                                                                                                                                                                                                                                                                                                                                                      |
| groupXII  | 2285374  | 2600392  | Us | psL | ENSGACG00000003616 | PDYN             | -                                                                                                                                                                                                                                                                                                                                                                                                                                                                                                                                                                                                                                                                                                             |
| groupXII  | 2285374  | 2600392  | Us | psL | ENSGACG00000003620 | GMEB2            | nucleus, DNA binding, binding                                                                                                                                                                                                                                                                                                                                                                                                                                                                                                                                                                                                                                                                                 |
| groupXII  | 2285374  | 2600392  | Us | psL | ENSGACG00000003625 | -                | hydrolase activity                                                                                                                                                                                                                                                                                                                                                                                                                                                                                                                                                                                                                                                                                            |
| groupXII  | 2285374  | 2600392  | Us | psL | ENSGACG00000003630 | -                | signal transduction, GTP catabolic process, small GTPase mediated signal transduction, intracellular protein transport, nucleocytoplasmic transport, protein transport, intracellular, GTPase activity, GTP binding                                                                                                                                                                                                                                                                                                                                                                                                                                                                                           |
| groupXII  | 2285374  | 2600392  | Us | psL | ENSGACG00000021304 | -                | -                                                                                                                                                                                                                                                                                                                                                                                                                                                                                                                                                                                                                                                                                                             |
| groupXII  | 2285374  | 2600392  | Us | psL | ENSGACG00000022313 | -                | -                                                                                                                                                                                                                                                                                                                                                                                                                                                                                                                                                                                                                                                                                                             |
| groupXII  | 2285374  | 2600392  | Us | psL | ENSGACG00000003654 | C20orf151        | -                                                                                                                                                                                                                                                                                                                                                                                                                                                                                                                                                                                                                                                                                                             |
| groupXII  | 2285374  | 2600392  | Us | psL | ENSGACG00000003657 | -                | -                                                                                                                                                                                                                                                                                                                                                                                                                                                                                                                                                                                                                                                                                                             |
| groupXII  | 2285374  | 2600392  | Us | psL | ENSGACG00000003649 | GATA5            | regulation of transcription, DNA-dependent, positive regulation of transcription, DNA-dependent, endoderm formation, pancreas development, myeloid cell differentiation, heart morphogenesis, Kupffer's vesicle development, cardioblast migration to the midline involved in heart field formation, left/right pattern formation, thyroid gland development, thymus development, post-embryonic foregut morphogenesis, positive regulation of transcription from RNA polymerase II promoter, heart development, endoderm development, liver development, nucleus, sequence-specific DNA binding transcription factor activity, DNA binding, zinc ion binding, sequence-specific DNA binding, protein binding |
| groupXII  | 10925827 | 10944827 | Us | psL | ENSGACG00000008823 | -                | protein binding                                                                                                                                                                                                                                                                                                                                                                                                                                                                                                                                                                                                                                                                                               |
| groupXII  | 11497511 | 11518051 | Us | psR | ENSGACG00000009372 | RARG (1 of 2)    | regulation of transcription, DNA-dependent, steroid hormone mediated signaling pathway, pharyngeal system development, nucleus, sequence-specific DNA binding transcription factor activity, steroid hormone receptor activity, zinc ion binding, sequence-specific DNA binding                                                                                                                                                                                                                                                                                                                                                                                                                               |
| groupXII  | 12140576 | 12160162 | Us | bg  | ENSGACG00000009758 | TEAD3 (2 of 2)   | regulation of transcription, DNA-dependent, nucleus, sequence-specific DNA binding transcription factor activity, protein binding                                                                                                                                                                                                                                                                                                                                                                                                                                                                                                                                                                             |
| groupXII  | 13737599 | 13834163 | Us | n   | ENSGACG00000010842 | ANKRD52 (2 of 2) | protein binding                                                                                                                                                                                                                                                                                                                                                                                                                                                                                                                                                                                                                                                                                               |
| groupXII  | 13737599 | 13834163 | Us | n   | ENSGACG00000010849 | COQ10A           | -                                                                                                                                                                                                                                                                                                                                                                                                                                                                                                                                                                                                                                                                                                             |
| groupXII  | 13737599 | 13834163 | Us | n   | ENSGACG00000010851 | CS               | cellular carbohydrate metabolic process, tricarboxylic acid cycle, transferase activity, transferring acyl groups, acyl groups converted into alkyl on transfer, citrate (Si)-synthase activity                                                                                                                                                                                                                                                                                                                                                                                                                                                                                                               |
| groupXII  | 13737599 | 13834163 | Us | n   | ENSGACG00000010885 | -                | -                                                                                                                                                                                                                                                                                                                                                                                                                                                                                                                                                                                                                                                                                                             |
| groupXII  | 13737599 | 13834163 | Us | n   | ENSGACG00000010890 | -                | cytoplasm, protein binding                                                                                                                                                                                                                                                                                                                                                                                                                                                                                                                                                                                                                                                                                    |
| groupXII  | 13737599 | 13834163 | Us | n   | ENSGACG00000010906 | DAZAP2           | -                                                                                                                                                                                                                                                                                                                                                                                                                                                                                                                                                                                                                                                                                                             |
| groupXII  | 13737599 | 13834163 | Us | n   | ENSGACG00000010925 | POU6F1           | -                                                                                                                                                                                                                                                                                                                                                                                                                                                                                                                                                                                                                                                                                                             |
| groupXII  | 13737599 | 13834163 | Us | n   | ENSGACG00000010929 | TFCP2            | protein binding                                                                                                                                                                                                                                                                                                                                                                                                                                                                                                                                                                                                                                                                                               |
| groupXII  | 13737599 | 13834163 | Us | n   | ENSGACG00000010877 | -                | proteolysis, membrane, serine-type peptidase activity                                                                                                                                                                                                                                                                                                                                                                                                                                                                                                                                                                                                                                                         |
| groupXII  | 13737599 | 13834163 | Us | n   | ENSGACG00000010902 | -                | -                                                                                                                                                                                                                                                                                                                                                                                                                                                                                                                                                                                                                                                                                                             |
| groupXIII | 7972287  | 8022580  | Us | n   | ENSGACG00000007973 | FOXB2            | -                                                                                                                                                                                                                                                                                                                                                                                                                                                                                                                                                                                                                                                                                                             |

|           |          |          |    |     |                    |                   |                                                                                                                                                                                                                                                                                                                |
|-----------|----------|----------|----|-----|--------------------|-------------------|----------------------------------------------------------------------------------------------------------------------------------------------------------------------------------------------------------------------------------------------------------------------------------------------------------------|
| groupXIII | 7972287  | 8022580  | Us | n   | ENSGACG00000007980 | -                 | -                                                                                                                                                                                                                                                                                                              |
| groupXIII | 7972287  | 8022580  | Us | n   | ENSGACG00000007925 | VPS13A            | protein localization                                                                                                                                                                                                                                                                                           |
| groupXIII | 9202236  | 9231236  | Us | psR | ENSGACG00000009215 | FOXN4             | regulation of transcription, DNA-dependent, regulation of heart contraction, positive regulation of transcription, DNA-dependent, sequence-specific DNA binding transcription factor activity, sequence-specific DNA binding                                                                                   |
| groupXIII | 9202236  | 9231236  | Us | psR | ENSGACG00000009222 | ACACB             | metabolic process, fatty acid biosynthetic process, ATP binding, catalytic activity, ligase activity, acetyl-CoA carboxylase activity                                                                                                                                                                          |
| groupXIII | 9202236  | 9231236  | Us | psR | ENSGACG00000009265 | POLE              | -                                                                                                                                                                                                                                                                                                              |
| groupXIII | 10308749 | 10336228 | Us | n   | ENSGACG00000010245 | CCNH              | regulation of cyclin-dependent protein kinase activity, holo TFIIF complex, protein kinase binding                                                                                                                                                                                                             |
| groupXIII | 10611632 | 10629632 | Us | n   | ENSGACG00000010281 | -                 | small GTPase mediated signal transduction, protein transport, intracellular, zinc ion binding, GTP binding, protein binding                                                                                                                                                                                    |
| groupXIII | 11509924 | 11555132 | Us | psR | ENSGACG00000010571 | MBLAC2            | hydrolase activity                                                                                                                                                                                                                                                                                             |
| groupXIII | 11509924 | 11555132 | Us | psR | ENSGACG00000010576 | -                 | signal transduction, intracellular, protein binding                                                                                                                                                                                                                                                            |
| groupXIII | 11837144 | 11920602 | Us | n   | ENSGACG00000010750 | -                 | -                                                                                                                                                                                                                                                                                                              |
| groupXIII | 11837144 | 11920602 | Us | n   | ENSGACG00000010753 | -                 | -                                                                                                                                                                                                                                                                                                              |
| groupXIII | 11837144 | 11920602 | Us | n   | ENSGACG00000010756 | ENTPD4            | hydrolase activity                                                                                                                                                                                                                                                                                             |
| groupXIII | 11837144 | 11920602 | Us | n   | ENSGACG00000010776 | NKX3-1            | regulation of transcription, DNA-dependent, nucleus, sequence-specific DNA binding transcription factor activity, sequence-specific DNA binding, protein binding                                                                                                                                               |
| groupXIII | 11837144 | 11920602 | Us | n   | ENSGACG00000010780 | NKX2-6            | regulation of transcription, DNA-dependent, embryonic heart tube development, heart looping, heart morphogenesis, cardiac muscle cell proliferation, cardiac muscle cell differentiation, nucleus, sequence-specific DNA binding transcription factor activity, sequence-specific DNA binding, protein binding |
| groupXIII | 11837144 | 11920602 | Us | n   | ENSGACG00000010716 | GDA               | hydrolase activity                                                                                                                                                                                                                                                                                             |
| groupXIII | 11837144 | 11920602 | Us | n   | ENSGACG00000010765 | SLC25A37          | -                                                                                                                                                                                                                                                                                                              |
| groupXIII | 11837144 | 11920602 | Us | n   | ENSGACG00000010784 | STC1 (1 of 2)     | extracellular region, ATP binding, hormone activity                                                                                                                                                                                                                                                            |
| groupXIII | 12771187 | 12838733 | Us | psR | ENSGACG00000011263 | SDS               | metabolic process, cellular amino acid metabolic process, catalytic activity, pyridoxal phosphate binding                                                                                                                                                                                                      |
| groupXIII | 12771187 | 12838733 | Us | psR | ENSGACG00000011293 | C12orf51 (2 of 2) | -                                                                                                                                                                                                                                                                                                              |
| groupXIII | 12771187 | 12838733 | Us | psR | ENSGACG00000011278 | C12orf51 (1 of 2) | cellular protein modification process, intracellular, acid-amino acid ligase activity                                                                                                                                                                                                                          |
| groupXIII | 12983355 | 13029382 | Us | psL | ENSGACG00000011510 | TMC2 (2 of 2)     | integral to membrane                                                                                                                                                                                                                                                                                           |
| groupXIII | 12983355 | 13029382 | Us | psL | ENSGACG00000011514 | -                 | iron ion binding, electron carrier activity, heme binding, oxidoreductase activity, acting on paired donors, with incorporation or reduction of molecular oxygen                                                                                                                                               |
| groupXIII | 12983355 | 13029382 | Us | psL | ENSGACG00000011501 | TMC1              | integral to membrane                                                                                                                                                                                                                                                                                           |
| groupXIII | 12983355 | 13029382 | Us | psL | ENSGACG00000011546 | ANXA1 (1 of 2)    | calcium ion binding, calcium-dependent phospholipid binding                                                                                                                                                                                                                                                    |
| groupXIII | 13355139 | 13427412 | Us | psL | ENSGACG00000011927 | DGCR6L            | -                                                                                                                                                                                                                                                                                                              |
| groupXIII | 13355139 | 13427412 | Us | psL | ENSGACG00000011948 | SLC20A1 (2 of 2)  | phosphate ion transport, membrane, binding, inorganic phosphate transmembrane transporter activity                                                                                                                                                                                                             |
| groupXIII | 13355139 | 13427412 | Us | psL | ENSGACG00000011961 | SYN1              | -                                                                                                                                                                                                                                                                                                              |
| groupXIII | 13355139 | 13427412 | Us | psL | ENSGACG00000011938 | DTX1              | zinc ion binding, protein binding                                                                                                                                                                                                                                                                              |
| groupXIII | 13355139 | 13427412 | Us | psL | ENSGACG00000011954 | -                 | -                                                                                                                                                                                                                                                                                                              |
| groupXIII | 13355139 | 13427412 | Us | psL | ENSGACG00000011932 | RASAL1            | signal transduction, intracellular signal transduction, regulation of small GTPase mediated signal transduction, intracellular, protein binding, GTPase activator activity                                                                                                                                     |
| groupXV   | 12655665 | 12693614 | Us | psL | -                  | -                 | -                                                                                                                                                                                                                                                                                                              |
| groupXVI  | 5959507  | 6055021  | Us | psL | -                  | -                 | -                                                                                                                                                                                                                                                                                                              |
| groupXVI  | 9490632  | 9558899  | Us | n   | ENSGACG00000004299 | STK24 (1 of 2)    | protein phosphorylation, ATP binding, protein kinase activity, transferase activity, transferring phosphorus-containing groups, protein serine/threonine kinase activity                                                                                                                                       |
| groupXVI  | 9490632  | 9558899  | Us | n   | ENSGACG00000004314 | INO80D            | -                                                                                                                                                                                                                                                                                                              |
| groupXVI  | 9490632  | 9558899  | Us | n   | ENSGACG00000004237 | DOCK9 (1 of 2)    | GTP binding, protein binding, guanyl-nucleotide exchange factor activity, GTPase binding                                                                                                                                                                                                                       |
| groupXVI  | 9490632  | 9558899  | Us | n   | ENSGACG00000004265 | SLC15A1 (2 of 2)  | oligopeptide transport, membrane, transporter activity                                                                                                                                                                                                                                                         |
| groupXVI  | 10646828 | 10709828 | Us | n   | ENSGACG00000005385 | GALNT3            | -                                                                                                                                                                                                                                                                                                              |
| groupXVI  | 10646828 | 10709828 | Us | n   | ENSGACG00000005428 | TTC21B            | protein binding, identical protein binding                                                                                                                                                                                                                                                                     |
| groupXVI  | 10646828 | 10709828 | Us | n   | ENSGACG00000005450 | -                 | ion transport, sodium ion transport, transmembrane transport, membrane, voltage-gated sodium channel complex, ion channel activity, voltage-gated sodium channel activity                                                                                                                                      |
| groupXVI  | 10646828 | 10709828 | Us | n   | ENSGACG00000005466 | SLC38A11          | -                                                                                                                                                                                                                                                                                                              |

|            |          |          |    |     |                    |                 |                                                                                                                                                                                                                                                                                                                                                         |
|------------|----------|----------|----|-----|--------------------|-----------------|---------------------------------------------------------------------------------------------------------------------------------------------------------------------------------------------------------------------------------------------------------------------------------------------------------------------------------------------------------|
| groupXVI   | 10646828 | 10709828 | Us | n   | ENSGACG00000005477 | COBLL1          | -                                                                                                                                                                                                                                                                                                                                                       |
| groupXVI   | 10646828 | 10709828 | Us | n   | ENSGACG00000005482 | -               | -                                                                                                                                                                                                                                                                                                                                                       |
| groupXVI   | 12597737 | 12610737 | Us | n   | ENSGACG00000006497 | ERBB4 (1 of 2)  | protein phosphorylation, transmembrane receptor protein tyrosine kinase signaling pathway, membrane, ATP binding, protein kinase activity, transferase activity, transferring phosphorus-containing groups, protein serine/threonine kinase activity, transmembrane receptor protein tyrosine kinase activity, protein tyrosine kinase activity         |
| groupXVI   | 12635047 | 12651047 | Us | bg  | ENSGACG00000006497 | ERBB4 (1 of 2)  | protein phosphorylation, transmembrane receptor protein tyrosine kinase signaling pathway, membrane, ATP binding, protein kinase activity, transferase activity, transferring phosphorus-containing groups, protein serine/threonine kinase activity, transmembrane receptor protein tyrosine kinase activity, protein tyrosine kinase activity         |
| groupXVI   | 12704546 | 12733874 | Us | bg  | ENSGACG00000006497 | ERBB4 (1 of 2)  | protein phosphorylation, transmembrane receptor protein tyrosine kinase signaling pathway, membrane, ATP binding, protein kinase activity, transferase activity, transferring phosphorus-containing groups, protein serine/threonine kinase activity, transmembrane receptor protein tyrosine kinase activity, protein tyrosine kinase activity         |
| groupXVIII | 3818080  | 3896352  | Us | n   | ENSGACG00000006261 | -               | -                                                                                                                                                                                                                                                                                                                                                       |
| groupXVIII | 3818080  | 3896352  | Us | n   | ENSGACG00000006268 | EPHA7           | protein phosphorylation, transmembrane receptor protein tyrosine kinase signaling pathway, membrane, integral to membrane, ATP binding, protein kinase activity, protein binding, transferase activity, transferring phosphorus-containing groups, protein serine/threonine kinase activity, ephrin receptor activity, protein tyrosine kinase activity |
| groupXVIII | 6203256  | 6272378  | Us | psR | ENSGACG00000007328 | HADHB           | metabolic process, catalytic activity, transferase activity, transferring acyl groups other than amino-acyl groups                                                                                                                                                                                                                                      |
| groupXVIII | 6203256  | 6272378  | Us | psR | ENSGACG00000007459 | FAM59B          | protein binding                                                                                                                                                                                                                                                                                                                                         |
| groupXVIII | 8454028  | 8471217  | Us | psR | ENSGACG00000008882 | CEP57L1         | -                                                                                                                                                                                                                                                                                                                                                       |
| groupXVIII | 8454028  | 8471217  | Us | psR | ENSGACG00000008895 | SESN1           | cell cycle arrest, determination of left/right symmetry, nucleus                                                                                                                                                                                                                                                                                        |
| groupXX    | 6203653  | 6226724  | Us | bg  | ENSGACG00000006438 | GRB10 (1 of 2)  | signal transduction, protein binding                                                                                                                                                                                                                                                                                                                    |
| groupXX    | 6232759  | 6350493  | Us | n   | ENSGACG00000006455 | -               | G-protein coupled receptor signaling pathway, integral to membrane                                                                                                                                                                                                                                                                                      |
| groupXX    | 6232759  | 6350493  | Us | n   | ENSGACG00000006459 | -               | G-protein coupled receptor signaling pathway, integral to membrane, G-protein coupled receptor signaling pathway, integral to membrane                                                                                                                                                                                                                  |
| groupXX    | 6232759  | 6350493  | Us | n   | ENSGACG00000006438 | GRB10 (1 of 2)  | signal transduction, protein binding                                                                                                                                                                                                                                                                                                                    |
| groupXX    | 6232759  | 6350493  | Us | n   | ENSGACG00000006446 | COBL            | protein binding                                                                                                                                                                                                                                                                                                                                         |
| groupXX    | 6232759  | 6350493  | Us | n   | ENSGACG00000006457 | -               | G-protein coupled receptor signaling pathway, integral to membrane                                                                                                                                                                                                                                                                                      |
| groupXX    | 7076535  | 7141289  | Us | psL | -                  | -               | -                                                                                                                                                                                                                                                                                                                                                       |
| groupXX    | 7360920  | 7380920  | Us | n   | ENSGACG00000006622 | CDKAL1          | RNA modification, macromolecule modification, cellular component, transferase activity, catalytic activity, 4 iron, 4 sulfur cluster binding, iron-sulfur cluster binding                                                                                                                                                                               |
| groupXX    | 7784420  | 7808660  | Us | -   | ENSGACG00000006955 | ZFAT            | DNA repair, intracellular, DNA binding, zinc ion binding, protein binding                                                                                                                                                                                                                                                                               |
| groupXX    | 7784420  | 7808660  | Us | -   | ENSGACG00000006970 | PTP4A3          | protein dephosphorylation, dephosphorylation, protein tyrosine phosphatase activity, protein tyrosine/serine/threonine phosphatase activity, phosphatase activity                                                                                                                                                                                       |
| groupXX    | 7784420  | 7808660  | Us | -   | ENSGACG00000006944 | MTBP            | -                                                                                                                                                                                                                                                                                                                                                       |
| groupXX    | 7879192  | 7898192  | Us | bg  | ENSGACG00000007045 | -               | membrane, cytoskeletal protein binding                                                                                                                                                                                                                                                                                                                  |
| groupXX    | 7879192  | 7898192  | Us | bg  | ENSGACG00000007035 | MRS2            | transmembrane transport, metal ion transport, membrane, metal ion transmembrane transporter activity                                                                                                                                                                                                                                                    |
| groupXX    | 7879192  | 7898192  | Us | bg  | ENSGACG00000007040 | -               | cell adhesion, cell-matrix adhesion, integrin-mediated signaling pathway, integrin complex, receptor activity, binding                                                                                                                                                                                                                                  |
| groupXX    | 7879192  | 7898192  | Us | bg  | ENSGACG00000007051 | CPQ             | proteolysis, metabolic process, peptidase activity, hydrolase activity                                                                                                                                                                                                                                                                                  |
| groupXX    | 7974519  | 8100519  | Us | psL | ENSGACG00000007079 | -               | -                                                                                                                                                                                                                                                                                                                                                       |
| groupXX    | 7974519  | 8100519  | Us | psL | ENSGACG00000007130 | CDCP1 (3 of 3)  | -                                                                                                                                                                                                                                                                                                                                                       |
| groupXX    | 7974519  | 8100519  | Us | psL | ENSGACG00000007136 | CLEC3B (1 of 2) | binding                                                                                                                                                                                                                                                                                                                                                 |
| groupXX    | 7974519  | 8100519  | Us | psL | ENSGACG00000007151 | UBXN11          | protein binding                                                                                                                                                                                                                                                                                                                                         |
| groupXX    | 7974519  | 8100519  | Us | psL | ENSGACG00000007065 | -               | cell adhesion, protein binding, structural molecule activity                                                                                                                                                                                                                                                                                            |
| groupXX    | 7974519  | 8100519  | Us | psL | ENSGACG00000007081 | DEPTOR          | intracellular signal transduction, protein binding                                                                                                                                                                                                                                                                                                      |
| groupXX    | 7974519  | 8100519  | Us | psL | ENSGACG00000007087 | LIMD1           | intracellular signal transduction, zinc ion binding                                                                                                                                                                                                                                                                                                     |
| groupXX    | 7974519  | 8100519  | Us | psL | ENSGACG00000007099 | LARS2           | translation, tRNA aminoacylation for protein translation, leucyl-tRNA aminoacylation, cytoplasm, ATP binding, nucleotide binding, aminoacyl-tRNA ligase activity, leucine-tRNA ligase activity                                                                                                                                                          |
| groupXX    | 7974519  | 8100519  | Us | psL | ENSGACG00000007141 | FEZ2 (2 of 2)   | -                                                                                                                                                                                                                                                                                                                                                       |
| groupXX    | 8182914  | 8236005  | Us | n   | ENSGACG00000007269 | FAM46B (1 of 2) | -                                                                                                                                                                                                                                                                                                                                                       |

|          |          |          |    |     |                     |                   |                                                                                                                                                                                                                                                                                                                                             |
|----------|----------|----------|----|-----|---------------------|-------------------|---------------------------------------------------------------------------------------------------------------------------------------------------------------------------------------------------------------------------------------------------------------------------------------------------------------------------------------------|
| groupXX  | 8182914  | 8236005  | Us | n   | ENSGACG00000007286  | TCEA3             | transcription, DNA-dependent, regulation of transcription, DNA-dependent, regulation of transcription elongation, DNA-dependent, transcription elongation, DNA-dependent, regulation of transcription from RNA polymerase II promoter, nucleus, nucleic acid binding, DNA binding, zinc ion binding, translation elongation factor activity |
| groupXX  | 8182914  | 8236005  | Us | n   | ENSGACG00000007300  | OPRD1 (1 of 2)    | G-protein coupled receptor signaling pathway, integral to membrane                                                                                                                                                                                                                                                                          |
| groupXX  | 8182914  | 8236005  | Us | n   | ENSGACG00000007316  | RCC1              | -                                                                                                                                                                                                                                                                                                                                           |
| groupXX  | 8182914  | 8236005  | Us | n   | ENSGACG00000007346  | PHACTR4 (1 of 2)  | regulation of transcription, DNA-dependent, transcription initiation, DNA-dependent, sequence-specific DNA binding transcription factor activity, DNA binding, sigma factor activity                                                                                                                                                        |
| groupXX  | 9654453  | 9719667  | Us | -   | ENSGACG00000008216  | JAZF1 (1 of 2)    | cilium assembly, determination of left/right symmetry, intracellular, zinc ion binding                                                                                                                                                                                                                                                      |
| groupXX  | 9654453  | 9719667  | Us | -   | ENSGACG00000008229  | HIBADH (2 of 2)   | oxidation-reduction process, valine metabolic process, pentose-phosphate shunt, NAD binding, 3-hydroxyisobutyrate dehydrogenase activity, phosphogluconate dehydrogenase (decarboxylating) activity                                                                                                                                         |
| groupXX  | 9654453  | 9719667  | Us | -   | ENSGACG00000008296  | HOXA13 (2 of 2)   | regulation of transcription, DNA-dependent, negative regulation of transcription, DNA-dependent, nucleus, sequence-specific DNA binding transcription factor activity, sequence-specific DNA binding, protein binding, nucleic acid binding transcription factor activity                                                                   |
| groupXX  | 9654453  | 9719667  | Us | -   | ENSGACG00000008297  | HOXA11 (2 of 2)   | regulation of transcription, DNA-dependent, nucleus, sequence-specific DNA binding transcription factor activity, sequence-specific DNA binding, protein binding                                                                                                                                                                            |
| groupXX  | 9654453  | 9719667  | Us | -   | ENSGACG00000008212  | CREB5             | regulation of transcription, DNA-dependent, intracellular, sequence-specific DNA binding transcription factor activity, DNA binding, zinc ion binding, sequence-specific DNA binding, protein dimerization activity                                                                                                                         |
| groupXX  | 9654453  | 9719667  | Us | -   | ENSGACG00000008221  | TAX1BP1 (1 of 2)  | -                                                                                                                                                                                                                                                                                                                                           |
| groupXX  | 12153275 | 12175313 | Us | psL | ENSGACG000000010639 | CACNG8 (2 of 2)   | membrane                                                                                                                                                                                                                                                                                                                                    |
| groupXX  | 12153275 | 12175313 | Us | psL | ENSGACG000000010641 | CACNG7 (2 of 2)   | membrane                                                                                                                                                                                                                                                                                                                                    |
| groupXXI | 1429423  | 1539933  | Us | n   | -                   | -                 | -                                                                                                                                                                                                                                                                                                                                           |
| groupXXI | 1624705  | 1807705  | Us | n   | ENSGACG000000022561 | -                 | -                                                                                                                                                                                                                                                                                                                                           |
| groupXXI | 1624705  | 1807705  | Us | n   | ENSGACG00000001786  | -                 | glycolysis, cytoplasm, 6-phosphofructokinase complex, 6-phosphofructokinase activity                                                                                                                                                                                                                                                        |
| groupXXI | 1956117  | 2132709  | Us | n   | ENSGACG00000001871  | SNX16             | cell communication, phosphatidylinositol binding, protein binding, cell communication, phosphatidylinositol binding, protein binding                                                                                                                                                                                                        |
| groupXXI | 1956117  | 2132709  | Us | n   | ENSGACG00000001881  | SERPINB2 (1 of 2) | -                                                                                                                                                                                                                                                                                                                                           |
| groupXXI | 1956117  | 2132709  | Us | n   | ENSGACG00000001884  | SERPINB2 (2 of 2) | -                                                                                                                                                                                                                                                                                                                                           |
| groupXXI | 1956117  | 2132709  | Us | n   | ENSGACG00000001917  | PIGM              | GPI anchor biosynthetic process, integral to membrane, endoplasmic reticulum membrane, transferase activity, transferring hexosyl groups                                                                                                                                                                                                    |
| groupXXI | 1956117  | 2132709  | Us | n   | ENSGACG00000001930  | ANKS6             | protein binding                                                                                                                                                                                                                                                                                                                             |
| groupXXI | 1956117  | 2132709  | Us | n   | ENSGACG00000001940  | RPS20             | translation, intracellular, ribosome, small ribosomal subunit, RNA binding, structural constituent of ribosome, translation, intracellular, ribosome, small ribosomal subunit, RNA binding, structural constituent of ribosome                                                                                                              |
| groupXXI | 1956117  | 2132709  | Us | n   | ENSGACG000000022779 | -                 | -                                                                                                                                                                                                                                                                                                                                           |
| groupXXI | 1956117  | 2132709  | Us | n   | ENSGACG00000001956  | -                 | -                                                                                                                                                                                                                                                                                                                                           |
| groupXXI | 1956117  | 2132709  | Us | n   | ENSGACG00000001958  | CCDC90A           | -                                                                                                                                                                                                                                                                                                                                           |
| groupXXI | 1956117  | 2132709  | Us | n   | ENSGACG00000001961  | DPH2              | peptidyl-diphthamide biosynthetic process from peptidyl-histidine, cytoplasm                                                                                                                                                                                                                                                                |
| groupXXI | 1956117  | 2132709  | Us | n   | ENSGACG00000001969  | FAM59A            | protein binding                                                                                                                                                                                                                                                                                                                             |
| groupXXI | 1956117  | 2132709  | Us | n   | ENSGACG00000001925  | -                 | regulation of transcription, DNA-dependent, signal transduction, response to chemical stimulus, regulation of transcription from RNA polymerase II promoter, nucleus, signal transducer activity                                                                                                                                            |
| groupXXI | 1956117  | 2132709  | Us | n   | ENSGACG00000001949  | -                 | microtubule-based movement, ATP binding, microtubule motor activity                                                                                                                                                                                                                                                                         |
| groupXXI | 1956117  | 2132709  | Us | n   | ENSGACG00000001966  | NCF2              | protein binding                                                                                                                                                                                                                                                                                                                             |
| groupXXI | 1956117  | 2132709  | Us | n   | ENSGACG00000001974  | PRKDC             | double-strand break repair via nonhomologous end joining, nucleus, DNA binding, ATP binding, binding, protein binding, transferase activity, transferring phosphorus-containing groups, phosphotransferase activity, alcohol group as acceptor, DNA-dependent protein kinase activity,                                                      |
| groupXXI | 2724804  | 2807804  | Us | psL | ENSGACG000000002116 | NSMAF             | protein binding                                                                                                                                                                                                                                                                                                                             |
| groupXXI | 2724804  | 2807804  | Us | psL | ENSGACG000000002128 | CNGB3             | ion transport, transmembrane transport, membrane, ion channel activity                                                                                                                                                                                                                                                                      |
| groupXXI | 4046432  | 4096479  | Us | n   | -                   | -                 | -                                                                                                                                                                                                                                                                                                                                           |
| groupXXI | 4171481  | 4221729  | Us | -   | -                   | -                 | -                                                                                                                                                                                                                                                                                                                                           |
| groupXXI | 4335682  | 4357200  | Us | psR | ENSGACG000000002369 | TMEM56            | integral to membrane, integral to membrane                                                                                                                                                                                                                                                                                                  |

|          |          |          |    |     |                    |                   |                                                                                                                                                                                                                                                                |
|----------|----------|----------|----|-----|--------------------|-------------------|----------------------------------------------------------------------------------------------------------------------------------------------------------------------------------------------------------------------------------------------------------------|
| groupXXI | 4335682  | 4357200  | Us | psR | ENSGACG00000002374 | BCMO1 (1 of 2)    | eye photoreceptor cell differentiation, hindbrain development, oxidation-reduction process, beta-carotene 15, 15'-monooxygenase activity                                                                                                                       |
| groupXXI | 4335682  | 4357200  | Us | psR | ENSGACG00000002373 | -                 | -                                                                                                                                                                                                                                                              |
| groupXXI | 4519973  | 4555973  | Us | psR | ENSGACG00000002390 | CTNND2 (2 of 2)   | binding, protein binding                                                                                                                                                                                                                                       |
| groupXXI | 6063085  | 6133269  | Us | n   | ENSGACG00000002670 | SEMA5A            | proteolysis, axon extension, membrane, catalytic activity, protein binding, cysteine-type endopeptidase activity                                                                                                                                               |
| groupXXI | 6485712  | 6521712  | Us | psL | ENSGACG00000002723 | PI15              | extracellular region                                                                                                                                                                                                                                           |
| groupXXI | 6485712  | 6521712  | Us | psL | ENSGACG00000002714 | CRISPLD1 (1 of 2) | extracellular region                                                                                                                                                                                                                                           |
| groupI   | 4960585  | 5104133  | Ca | psR | ENSGACG00000007181 | SI                | carbohydrate metabolic process, methylation, nucleic acid binding, hydrolase activity, hydrolyzing O-glycosyl compounds, methyltransferase activity                                                                                                            |
| groupI   | 5170476  | 5204551  | Ca | psR | ENSGACG00000007230 | -                 | -                                                                                                                                                                                                                                                              |
| groupI   | 8787521  | 8839086  | Ca | n   | ENSGACG00000009256 | SHOX2             | regulation of transcription, DNA-dependent, heart development, nucleus, sequence-specific DNA binding transcription factor activity, sequence-specific DNA binding, protein binding                                                                            |
| groupI   | 8787521  | 8839086  | Ca | n   | ENSGACG00000009247 | RSRC1             | -                                                                                                                                                                                                                                                              |
| groupI   | 13577265 | 13647013 | Ca | -   | ENSGACG00000011579 | DCLK1 (2 of 2)    | intracellular signal transduction, protein phosphorylation, ATP binding, protein kinase activity, transferase activity, transferring phosphorus-containing groups, protein serine/threonine kinase activity                                                    |
| groupI   | 13577265 | 13647013 | Ca | -   | ENSGACG00000011555 | NBEA (1 of 2)     | protein binding, transferase activity, transferring phosphorus-containing groups                                                                                                                                                                               |
| groupI   | 13577265 | 13647013 | Ca | -   | ENSGACG00000011596 | SPG20 (1 of 2)    | oxidation-reduction process, metabolic process, oxidoreductase activity                                                                                                                                                                                        |
| groupI   | 13929521 | 13988926 | Ca | psL | ENSGACG00000011744 | -                 | membrane, tight junction, structural molecule activity                                                                                                                                                                                                         |
| groupI   | 13929521 | 13988926 | Ca | psL | ENSGACG00000011753 | -                 | membrane, tight junction, structural molecule activity                                                                                                                                                                                                         |
| groupI   | 13929521 | 13988926 | Ca | psL | ENSGACG00000011755 | GRIK1 (1 of 2)    | membrane, ionotropic glutamate receptor activity, extracellular-glutamate-gated ion channel activity                                                                                                                                                           |
| groupI   | 13929521 | 13988926 | Ca | psL | ENSGACG00000011798 | BACH1             | regulation of transcription, DNA-dependent, sequence-specific DNA binding transcription factor activity, DNA binding, sequence-specific DNA binding, protein binding, protein dimerization activity                                                            |
| groupI   | 13929521 | 13988926 | Ca | psL | ENSGACG00000011804 | USP16             | ubiquitin-dependent protein catabolic process, zinc ion binding, ubiquitin thiolesterase activity                                                                                                                                                              |
| groupI   | 13929521 | 13988926 | Ca | psL | ENSGACG00000011812 | RWDD2B            | protein binding                                                                                                                                                                                                                                                |
| groupI   | 13929521 | 13988926 | Ca | psL | ENSGACG00000011816 | CADM2 (1 of 2)    | protein binding                                                                                                                                                                                                                                                |
| groupI   | 16775583 | 16826316 | Ca | psR | ENSGACG00000013006 | NAPA              | intracellular protein transport                                                                                                                                                                                                                                |
| groupI   | 16775583 | 16826316 | Ca | psR | ENSGACG00000013015 | GLTSCR1           | -                                                                                                                                                                                                                                                              |
| groupI   | 16775583 | 16826316 | Ca | psR | ENSGACG00000013042 | NUP88             | -                                                                                                                                                                                                                                                              |
| groupI   | 16775583 | 16826316 | Ca | psR | ENSGACG00000013044 | PSMD8             | -                                                                                                                                                                                                                                                              |
| groupI   | 16775583 | 16826316 | Ca | psR | ENSGACG00000013023 | EHD2 (1 of 2)     | calcium ion binding, GTPase activity, GTP binding, protein binding                                                                                                                                                                                             |
| groupI   | 16775583 | 16826316 | Ca | psR | ENSGACG00000013083 | SPRED3            | -                                                                                                                                                                                                                                                              |
| groupI   | 16775583 | 16826316 | Ca | psR | ENSGACG00000012993 | BCKDHA            | metabolic process, oxidoreductase activity, acting on the aldehyde or oxo group of donors, disulfide as acceptor                                                                                                                                               |
| groupI   | 16833535 | 16861190 | Ca | psR | ENSGACG00000013085 | DHX34             | nuclear-transcribed mRNA catabolic process, nonsense-mediated decay, embryo development, nucleic acid binding, ATP binding, electron carrier activity, metal ion binding, nucleotide binding, helicase activity, nucleoside-triphosphatase activity            |
| groupI   | 16833535 | 16861190 | Ca | psR | ENSGACG00000013091 | ST14 (1 of 3)     | proteolysis, epidermis development, catalytic activity, protein binding, serine-type endopeptidase activity                                                                                                                                                    |
| groupI   | 16833535 | 16861190 | Ca | psR | ENSGACG00000013115 | APLP2             | integral to membrane, binding, serine-type endopeptidase inhibitor activity,                                                                                                                                                                                   |
| groupI   | 21236349 | 21288020 | Ca | n   | ENSGACG00000014230 | -                 | -                                                                                                                                                                                                                                                              |
| groupI   | 22937800 | 22953890 | Ca | n   | ENSGACG00000014843 | ARHGEF7 (2 of 2)  | regulation of Rho protein signal transduction, blood vessel development, epiboly involved in gastrulation with mouth forming second, protein localization to adherens junction, intracellular, protein binding, Rho guanyl-nucleotide exchange factor activity |
| groupI   | 22956267 | 22966438 | Ca | n   | -                  | -                 | -                                                                                                                                                                                                                                                              |
| groupI   | 23001251 | 23034127 | Ca | psR | ENSGACG00000014851 | ATP11A (1 of 2)   | ATP biosynthetic process, phospholipid transport, membrane, integral to membrane, magnesium ion binding, ATP binding, ATPase activity, coupled to transmembrane movement of ions, phosphorylative mechanism, phospholipid-translocating ATPase activity        |
| groupI   | 23305198 | 23335911 | Ca | psL | ENSGACG00000014926 | ZRANB3            | intracellular, nucleic acid binding, DNA binding, zinc ion binding, ATP binding, endonuclease activity, helicase activity                                                                                                                                      |
| groupI   | 23722574 | 23783973 | Ca | psL | ENSGACG00000015007 | NDFIP2            | -                                                                                                                                                                                                                                                              |
| groupII  | 5842830  | 5903218  | Ca | psR | ENSGACG00000015040 | -                 | -                                                                                                                                                                                                                                                              |
| groupII  | 5842830  | 5903218  | Ca | psR | ENSGACG00000022753 | -                 | -                                                                                                                                                                                                                                                              |
| groupII  | 5842830  | 5903218  | Ca | psR | ENSGACG00000022812 | -                 | -                                                                                                                                                                                                                                                              |
| groupII  | 5842830  | 5903218  | Ca | psR | ENSGACG00000015047 | WHAMM             | -                                                                                                                                                                                                                                                              |



|         |          |          |    |     |                    |                   |                                                                                                                                                                                                                                                                                                                                                                                          |
|---------|----------|----------|----|-----|--------------------|-------------------|------------------------------------------------------------------------------------------------------------------------------------------------------------------------------------------------------------------------------------------------------------------------------------------------------------------------------------------------------------------------------------------|
| groupII | 5842830  | 5903218  | Ca | psR | ENSGACG00000015051 | HOMER2            | protein binding                                                                                                                                                                                                                                                                                                                                                                          |
| groupII | 5842830  | 5903218  | Ca | psR | ENSGACG00000015037 | -                 | regulation of transcription, DNA-dependent, signal transduction, two-component signal transduction system (phosphorelay), signal transducer activity, catalytic activity, two-component response regulator activity, 3', 5'-cyclic-nucleotide phosphodiesterase activity, phosphoric diester hydrolase activity                                                                          |
| groupII | 5842830  | 5903218  | Ca | psR | ENSGACG00000015044 | FSD2              | protein binding                                                                                                                                                                                                                                                                                                                                                                          |
| groupII | 6738132  | 6768135  | Ca | psR | -                  | -                 | -                                                                                                                                                                                                                                                                                                                                                                                        |
| groupII | 7093099  | 7200100  | Ca | n   | ENSGACG00000015262 | PCDH20            | cell adhesion, homophilic cell adhesion, membrane, plasma membrane, calcium ion binding                                                                                                                                                                                                                                                                                                  |
| groupII | 7093099  | 7200100  | Ca | n   | ENSGACG00000022515 | -                 | -                                                                                                                                                                                                                                                                                                                                                                                        |
| groupII | 7093099  | 7200100  | Ca | n   | ENSGACG00000015264 | TDRD3             | protein binding, mRNA processing, nucleus, cytoplasm, nucleic acid binding, RNA binding, protein binding, phosphotransferase activity, alcohol group as acceptor                                                                                                                                                                                                                         |
| groupII | 7093099  | 7200100  | Ca | n   | ENSGACG00000015270 | DIAPH3            | actin cytoskeleton organization, cellular component organization, binding, actin binding, Rho GTPase binding                                                                                                                                                                                                                                                                             |
| groupII | 7635067  | 7711452  | Ca | n   | ENSGACG00000015283 | BLZF1             | -                                                                                                                                                                                                                                                                                                                                                                                        |
| groupII | 7635067  | 7711452  | Ca | n   | ENSGACG00000015292 | ERCC5             | DNA repair, DNA binding, catalytic activity, nuclease activity, hydrolase activity, acting on ester bonds                                                                                                                                                                                                                                                                                |
| groupII | 7635067  | 7711452  | Ca | n   | ENSGACG00000015294 | -                 | -                                                                                                                                                                                                                                                                                                                                                                                        |
| groupII | 7635067  | 7711452  | Ca | n   | ENSGACG00000015297 | METTL21C (2 of 2) | -                                                                                                                                                                                                                                                                                                                                                                                        |
| groupII | 7635067  | 7711452  | Ca | n   | ENSGACG00000015298 | -                 | -                                                                                                                                                                                                                                                                                                                                                                                        |
| groupII | 7635067  | 7711452  | Ca | n   | ENSGACG00000015305 | PROS1             | extracellular region, calcium ion binding, protein binding                                                                                                                                                                                                                                                                                                                               |
| groupII | 7635067  | 7711452  | Ca | n   | ENSGACG00000015281 | RG9MTD1           | -                                                                                                                                                                                                                                                                                                                                                                                        |
| groupII | 7635067  | 7711452  | Ca | n   | ENSGACG00000015300 | TPP2              | proteolysis, serine-type endopeptidase activity                                                                                                                                                                                                                                                                                                                                          |
| groupII | 7635067  | 7711452  | Ca | n   | ENSGACG00000015302 | RASA3             | signal transduction, intracellular signal transduction, regulation of small GTPase mediated signal transduction, intracellular, protein binding, GTPase activator activity                                                                                                                                                                                                               |
| groupII | 8123901  | 8197571  | Ca | n   | ENSGACG00000015376 | KCTD12            | potassium ion transport, membrane, voltage-gated potassium channel complex, protein binding, voltage-gated potassium channel activity                                                                                                                                                                                                                                                    |
| groupII | 8123901  | 8197571  | Ca | n   | ENSGACG00000015378 | SLC5A7 (2 of 2)   | transport, transmembrane transport, membrane, transporter activity                                                                                                                                                                                                                                                                                                                       |
| groupII | 8123901  | 8197571  | Ca | n   | ENSGACG00000015382 | ARL6              | small GTPase mediated signal transduction, intracellular protein transport, protein transport, cilium assembly, melanosome transport, Kupffer's vesicle development, determination of left/right symmetry, pectoral fin development, intracellular, GTP binding                                                                                                                          |
| groupII | 8123901  | 8197571  | Ca | n   | ENSGACG00000015384 | EPHA6 (2 of 2)    | protein phosphorylation, transmembrane receptor protein tyrosine kinase signaling pathway, membrane, integral to membrane, ATP binding, protein kinase activity, protein binding, transferase activity, transferring phosphorus-containing groups, protein serine/threonine kinase activity, ephrin receptor activity, protein tyrosine kinase activity                                  |
| groupII | 10753951 | 10810150 | Ca | -   | ENSGACG00000015779 | ZFHX3             | regulation of transcription, DNA-dependent, metal ion transport, nucleus, intracellular, sequence-specific DNA binding transcription factor activity, nucleic acid binding, zinc ion binding, metal ion binding, sequence-specific DNA binding, protein binding                                                                                                                          |
| groupII | 10895790 | 10971790 | Ca | psL | -                  | -                 | -                                                                                                                                                                                                                                                                                                                                                                                        |
| groupII | 11659826 | 11819378 | Ca | n   | ENSGACG00000015876 | -                 | -                                                                                                                                                                                                                                                                                                                                                                                        |
| groupII | 11659826 | 11819378 | Ca | n   | ENSGACG00000015877 | GIN1              | -                                                                                                                                                                                                                                                                                                                                                                                        |
| groupII | 11659826 | 11819378 | Ca | n   | ENSGACG00000015878 | GFOD2             | oxidoreductase activity                                                                                                                                                                                                                                                                                                                                                                  |
| groupII | 11659826 | 11819378 | Ca | n   | ENSGACG00000015879 | THAP11            | oxidation-reduction process, nucleic acid binding, oxidoreductase activity, flavin adenine dinucleotide binding                                                                                                                                                                                                                                                                          |
| groupII | 11659826 | 11819378 | Ca | n   | ENSGACG00000015880 | SLC38A8 (2 of 2)  | -                                                                                                                                                                                                                                                                                                                                                                                        |
| groupII | 11659826 | 11819378 | Ca | n   | ENSGACG00000015882 | FTSJD1            | methylation, nucleic acid binding, methyltransferase activity, methylation, nucleic acid binding, methyltransferase activity                                                                                                                                                                                                                                                             |
| groupII | 11659826 | 11819378 | Ca | n   | ENSGACG00000015885 | GOT2              | biosynthetic process, catalytic activity, pyridoxal phosphate binding, transferase activity, transferring nitrogenous groups, biosynthetic process, catalytic activity, pyridoxal phosphate binding, transferase activity, transferring nitrogenous groups, biosynthetic process, catalytic activity, pyridoxal phosphate binding, transferase activity, transferring nitrogenous groups |
| groupII | 11659826 | 11819378 | Ca | n   | ENSGACG00000015895 | SLC38A7           | -                                                                                                                                                                                                                                                                                                                                                                                        |
| groupII | 11659826 | 11819378 | Ca | n   | ENSGACG00000015897 | -                 | proteolysis, serine-type carboxypeptidase activity                                                                                                                                                                                                                                                                                                                                       |
| groupII | 11659826 | 11819378 | Ca | n   | ENSGACG00000015908 | -                 | -                                                                                                                                                                                                                                                                                                                                                                                        |
| groupII | 11659826 | 11819378 | Ca | n   | ENSGACG00000015883 | CALB2 (2 of 2)    | calcium ion binding                                                                                                                                                                                                                                                                                                                                                                      |
| groupII | 11659826 | 11819378 | Ca | n   | ENSGACG00000015906 | GAS8 (1 of 3)     | -                                                                                                                                                                                                                                                                                                                                                                                        |
| groupII | 11659826 | 11819378 | Ca | n   | ENSGACG00000015909 | STRC              | -                                                                                                                                                                                                                                                                                                                                                                                        |
| groupII | 11659826 | 11819378 | Ca | n   | ENSGACG00000015911 | FURIN (1 of 2)    | proteolysis, cartilage development, cartilage morphogenesis, fin morphogenesis, serine-type endopeptidase activity                                                                                                                                                                                                                                                                       |

|          |          |          |    |     |                    |                  |                                                                                                                                                                                                                                                                              |
|----------|----------|----------|----|-----|--------------------|------------------|------------------------------------------------------------------------------------------------------------------------------------------------------------------------------------------------------------------------------------------------------------------------------|
| groupII  | 11827734 | 11877735 | Ca | n   | ENSGACG00000022262 | -                | -                                                                                                                                                                                                                                                                            |
| groupII  | 11827734 | 11877735 | Ca | n   | ENSGACG00000015919 | FES              | protein phosphorylation, ATP binding, protein kinase activity, protein binding, transferase activity, transferring phosphorus-containing groups, fatty-acyl-CoA binding, protein serine/threonine kinase activity, protein tyrosine kinase activity                          |
| groupII  | 11827734 | 11877735 | Ca | n   | ENSGACG00000015923 | RHCG (2 of 2)    | -                                                                                                                                                                                                                                                                            |
| groupII  | 11827734 | 11877735 | Ca | n   | ENSGACG00000015929 | KIF7             | microtubule-based movement, tubulin complex assembly, negative regulation of smoothened signaling pathway, determination of left/right symmetry, microtubule, Hedgehog signaling complex, ATP binding, unfolded protein binding, microtubule motor activity, protein binding |
| groupII  | 12060739 | 12118432 | Ca | n   | ENSGACG00000015958 | IRF8             | regulation of transcription, DNA-dependent, sequence-specific DNA binding transcription factor activity, protein binding                                                                                                                                                     |
| groupII  | 12060739 | 12118432 | Ca | n   | ENSGACG00000015963 | COX4I1           | response to hypoxia, cytochrome-c oxidase activity                                                                                                                                                                                                                           |
| groupII  | 12060739 | 12118432 | Ca | n   | ENSGACG00000015965 | EMC8             | -                                                                                                                                                                                                                                                                            |
| groupII  | 12060739 | 12118432 | Ca | n   | ENSGACG00000015967 | GINS2            | -                                                                                                                                                                                                                                                                            |
| groupII  | 12060739 | 12118432 | Ca | n   | ENSGACG00000015961 | -                | protein dephosphorylation, dephosphorylation, protein tyrosine phosphatase activity, protein tyrosine/serine/threonine phosphatase activity, phosphatase activity                                                                                                            |
| groupII  | 12708573 | 12785554 | Ca | n   | ENSGACG00000016001 | DEPDC7 (1 of 2)  | intracellular signal transduction, phosphopantetheine binding                                                                                                                                                                                                                |
| groupII  | 12708573 | 12785554 | Ca | n   | ENSGACG00000016002 | QSER1            | -                                                                                                                                                                                                                                                                            |
| groupII  | 12708573 | 12785554 | Ca | n   | ENSGACG00000015995 | HIPK3 (1 of 2)   | protein phosphorylation, ATP binding, protein kinase activity, transferase activity, transferring phosphorus-containing groups, protein serine/threonine kinase activity                                                                                                     |
| groupII  | 12708573 | 12785554 | Ca | n   | ENSGACG00000015997 | CSTF3            | RNA processing, mRNA processing, nucleus, intracellular                                                                                                                                                                                                                      |
| groupII  | 13981683 | 14010379 | Ca | psR | ENSGACG00000016243 | -                | -                                                                                                                                                                                                                                                                            |
| groupII  | 13981683 | 14010379 | Ca | psR | ENSGACG00000016246 | -                | -                                                                                                                                                                                                                                                                            |
| groupII  | 13981683 | 14010379 | Ca | psR | ENSGACG00000016245 | AHCTF1           | nuclear pore complex assembly, digestive tract development                                                                                                                                                                                                                   |
| groupII  | 13981683 | 14010379 | Ca | psR | ENSGACG00000016247 | -                | microtubule-based movement, ATP binding, protein binding, microtubule motor activity                                                                                                                                                                                         |
| groupII  | 14160454 | 14193070 | Ca | n   | ENSGACG00000016262 | USH2A            | cell adhesion, eye photoreceptor cell development, protein binding, structural molecule activity                                                                                                                                                                             |
| groupII  | 22412750 | 22442750 | Ca | n   | ENSGACG00000017513 | ZDHHC1           | -                                                                                                                                                                                                                                                                            |
| groupII  | 22412750 | 22442750 | Ca | n   | ENSGACG00000017514 | HSD11B2          | metabolic process, oxidoreductase activity, metabolic process, oxidoreductase activity                                                                                                                                                                                       |
| groupIII | 239710   | 321207   | Ca | n   | ENSGACG00000012674 | OXSRI (1 of 2)   | protein phosphorylation, ATP binding, protein kinase activity, transferase activity, transferring phosphorus-containing groups, protein serine/threonine kinase activity                                                                                                     |
| groupIII | 239710   | 321207   | Ca | n   | ENSGACG00000021273 | -                | -                                                                                                                                                                                                                                                                            |
| groupIII | 239710   | 321207   | Ca | n   | ENSGACG00000012795 | HHATL (1 of 2)   | -                                                                                                                                                                                                                                                                            |
| groupIII | 239710   | 321207   | Ca | n   | ENSGACG00000012831 | KBTD5 (2 of 2)   | DNA repair, protein binding, methylated-DNA-[protein]-cysteine S-methyltransferase activity                                                                                                                                                                                  |
| groupIII | 239710   | 321207   | Ca | n   | ENSGACG00000012842 | CASP8            | proteolysis, regulation of apoptotic process, apoptotic process, protein binding, cysteine-type endopeptidase activity, cysteine-type peptidase activity                                                                                                                     |
| groupIII | 239710   | 321207   | Ca | n   | ENSGACG00000012847 | C2orf62          | signal transduction, cAMP-dependent protein kinase regulator activity                                                                                                                                                                                                        |
| groupIII | 239710   | 321207   | Ca | n   | ENSGACG00000012849 | -                | proteolysis, regulation of apoptotic process, apoptotic process, intracellular, protein binding, cysteine-type endopeptidase activity, cysteine-type peptidase activity                                                                                                      |
| groupIII | 239710   | 321207   | Ca | n   | ENSGACG00000012859 | -                | protein binding                                                                                                                                                                                                                                                              |
| groupIII | 239710   | 321207   | Ca | n   | ENSGACG00000012863 | CXorf38          | -                                                                                                                                                                                                                                                                            |
| groupIII | 239710   | 321207   | Ca | n   | ENSGACG00000012708 | PLCD1 (2 of 2)   | signal transduction, intracellular signal transduction, lipid metabolic process, calcium ion binding, protein binding, phospholipase C activity, phosphatidylinositol phospholipase C activity, phosphoric diester hydrolase activity                                        |
| groupIII | 239710   | 321207   | Ca | n   | ENSGACG00000012836 | VIPR1 (2 of 2)   | G-protein coupled receptor signaling pathway, cell surface receptor signaling pathway, membrane, integral to membrane, G-protein coupled receptor activity, transmembrane signaling receptor activity                                                                        |
| groupIII | 239710   | 321207   | Ca | n   | ENSGACG00000012774 | CTDSPL (2 of 2)  | phosphatase activity, protein binding                                                                                                                                                                                                                                        |
| groupIII | 3044389  | 3469677  | Ca | n   | ENSGACG00000014270 | NOP9             | RNA binding, binding                                                                                                                                                                                                                                                         |
| groupIII | 3044389  | 3469677  | Ca | n   | ENSGACG00000014287 | -                | transposition, DNA-mediated, DNA binding, transposase activity                                                                                                                                                                                                               |
| groupIII | 3044389  | 3469677  | Ca | n   | ENSGACG00000014245 | CDH24            | cell adhesion, homophilic cell adhesion, membrane, plasma membrane, calcium ion binding                                                                                                                                                                                      |
| groupIII | 3044389  | 3469677  | Ca | n   | ENSGACG00000014253 | LRRC16B (2 of 2) | protein binding                                                                                                                                                                                                                                                              |
| groupIII | 3044389  | 3469677  | Ca | n   | ENSGACG00000014262 | -                | -                                                                                                                                                                                                                                                                            |

|          |          |          |    |     |                    |                  |                                                                                                                                                                                                                                                  |
|----------|----------|----------|----|-----|--------------------|------------------|--------------------------------------------------------------------------------------------------------------------------------------------------------------------------------------------------------------------------------------------------|
| groupIII | 3044389  | 3469677  | Ca | n   | ENSGACG00000014265 | REM2 (2 of 2)    | small GTPase mediated signal transduction, protein transport, dopaminergic neuron differentiation, intracellular, nucleotide binding, GTP binding, nucleoside-triphosphatase activity                                                            |
| groupIII | 3044389  | 3469677  | Ca | n   | ENSGACG00000014290 | FAM5B            | -                                                                                                                                                                                                                                                |
| groupIII | 3509912  | 3547026  | Ca | n   | -                  | -                | -                                                                                                                                                                                                                                                |
| groupIII | 3726483  | 3850207  | Ca | n   | ENSGACG00000014317 | PAPPA2           | cell differentiation, membrane                                                                                                                                                                                                                   |
| groupIII | 3726483  | 3850207  | Ca | n   | ENSGACG00000014303 | ASTN1            | protein binding                                                                                                                                                                                                                                  |
| groupIII | 3901803  | 4171166  | Ca | psL | ENSGACG00000014339 | TOE1             | regulation of transcription, DNA-dependent, nucleus, sequence-specific DNA binding transcription factor activity, nucleic acid binding, zinc ion binding                                                                                         |
| groupIII | 3901803  | 4171166  | Ca | psL | ENSGACG00000014352 | -                | integral to membrane                                                                                                                                                                                                                             |
| groupIII | 3901803  | 4171166  | Ca | psL | ENSGACG00000014354 | FABP6            | binding, bile acid binding                                                                                                                                                                                                                       |
| groupIII | 3901803  | 4171166  | Ca | psL | ENSGACG00000014377 | UROD             | porphyrin-containing compound biosynthetic process, porphyrin-containing compound metabolic process, uroporphyrinogen decarboxylase activity                                                                                                     |
| groupIII | 3901803  | 4171166  | Ca | psL | ENSGACG00000014381 | LYN              | protein phosphorylation, ATP binding, protein kinase activity, protein binding, transferase activity, transferring phosphorus-containing groups, protein serine/threonine kinase activity, protein tyrosine kinase activity                      |
| groupIII | 3901803  | 4171166  | Ca | psL | ENSGACG00000014398 | -                | -                                                                                                                                                                                                                                                |
| groupIII | 3901803  | 4171166  | Ca | psL | ENSGACG00000014328 | XRN1             | intracellular, nucleic acid binding, exonuclease activity                                                                                                                                                                                        |
| groupIII | 3901803  | 4171166  | Ca | psL | ENSGACG00000014348 | -                | selenium binding                                                                                                                                                                                                                                 |
| groupIII | 3901803  | 4171166  | Ca | psL | ENSGACG00000014366 | ZSWIM5           | zinc ion binding                                                                                                                                                                                                                                 |
| groupIII | 3901803  | 4171166  | Ca | psL | ENSGACG00000014401 | CTNND2 (1 of 2)  | binding, protein binding                                                                                                                                                                                                                         |
| groupIII | 5561006  | 5633137  | Ca | psL | ENSGACG00000014732 | PENK             | -                                                                                                                                                                                                                                                |
| groupIII | 5561006  | 5633137  | Ca | psL | ENSGACG00000014733 | SDR16C5          | metabolic process, oxidoreductase activity                                                                                                                                                                                                       |
| groupIII | 5561006  | 5633137  | Ca | psL | ENSGACG00000014747 | SLC44A5 (2 of 2) | -                                                                                                                                                                                                                                                |
| groupIII | 7439985  | 7465237  | Ca | n   | ENSGACG00000015299 | MEX3D            | zinc ion binding, RNA binding, protein binding                                                                                                                                                                                                   |
| groupIII | 7439985  | 7465237  | Ca | n   | ENSGACG00000015282 | TCF3 (2 of 2)    | regulation of transcription, DNA-dependent, striated muscle cell development, protein binding                                                                                                                                                    |
| groupIII | 7439985  | 7465237  | Ca | n   | ENSGACG00000015296 | -                | -                                                                                                                                                                                                                                                |
| groupIII | 8549327  | 8624152  | Ca | psL | ENSGACG00000015582 | -                | -                                                                                                                                                                                                                                                |
| groupIII | 8549327  | 8624152  | Ca | psL | ENSGACG00000015588 | -                | -                                                                                                                                                                                                                                                |
| groupIII | 8549327  | 8624152  | Ca | psL | ENSGACG00000015590 | ANO8 (2 of 2)    | -                                                                                                                                                                                                                                                |
| groupIII | 8549327  | 8624152  | Ca | psL | ENSGACG00000015576 | KCNN1 (1 of 2)   | potassium ion transport, integral to membrane, calcium-activated potassium channel activity, calmodulin binding                                                                                                                                  |
| groupIII | 8549327  | 8624152  | Ca | psL | ENSGACG00000015580 | -                | metal ion binding                                                                                                                                                                                                                                |
| groupIII | 8549327  | 8624152  | Ca | psL | ENSGACG00000015583 | NR2F6 (1 of 2)   | regulation of transcription, DNA-dependent, steroid hormone mediated signaling pathway, nucleus, sequence-specific DNA binding transcription factor activity, steroid hormone receptor activity, zinc ion binding, sequence-specific DNA binding |
| groupIII | 8549327  | 8624152  | Ca | psL | ENSGACG00000015594 | DDA1 (1 of 2)    | -                                                                                                                                                                                                                                                |
| groupIII | 10256794 | 10270838 | Ca | psL | -                  | -                | -                                                                                                                                                                                                                                                |
| groupIII | 10600649 | 10625505 | Ca | n   | ENSGACG00000016469 | MYLK4 (2 of 2)   | protein phosphorylation, ATP binding, protein kinase activity, transferase activity, transferring phosphorus-containing groups, protein serine/threonine kinase activity                                                                         |
| groupIII | 10626712 | 10750873 | Ca | n   | ENSGACG00000016471 | HECTD3           | cell adhesion, cellular protein modification process, intracellular, acid-amino acid ligase activity                                                                                                                                             |
| groupIII | 10626712 | 10750873 | Ca | n   | ENSGACG00000016489 | RPS8             | translation, intracellular, ribosome, structural constituent of ribosome                                                                                                                                                                         |
| groupIII | 10626712 | 10750873 | Ca | n   | ENSGACG00000022724 | -                | -                                                                                                                                                                                                                                                |
| groupIII | 10626712 | 10750873 | Ca | n   | ENSGACG00000022386 | -                | -                                                                                                                                                                                                                                                |
| groupIII | 10626712 | 10750873 | Ca | n   | ENSGACG00000022870 | -                | -                                                                                                                                                                                                                                                |
| groupIII | 10626712 | 10750873 | Ca | n   | ENSGACG00000022882 | -                | -                                                                                                                                                                                                                                                |
| groupIII | 10626712 | 10750873 | Ca | n   | ENSGACG00000022325 | -                | -                                                                                                                                                                                                                                                |
| groupIII | 10626712 | 10750873 | Ca | n   | ENSGACG00000022380 | -                | -                                                                                                                                                                                                                                                |
| groupIII | 10626712 | 10750873 | Ca | n   | ENSGACG00000022438 | -                | -                                                                                                                                                                                                                                                |
| groupIII | 10626712 | 10750873 | Ca | n   | ENSGACG00000016497 | ACADM            | oxidation-reduction process, metabolic process, oxidoreductase activity, acting on the CH-CH group of donors, acyl-CoA dehydrogenase activity                                                                                                    |
| groupIII | 10626712 | 10750873 | Ca | n   | ENSGACG00000016522 | RABGGTB          | catalytic activity                                                                                                                                                                                                                               |

|          |          |          |    |     |                    |                    |                                                                                                                                                                                                                                                                                                                                                             |
|----------|----------|----------|----|-----|--------------------|--------------------|-------------------------------------------------------------------------------------------------------------------------------------------------------------------------------------------------------------------------------------------------------------------------------------------------------------------------------------------------------------|
| groupIII | 10626712 | 10750873 | Ca | n   | ENSGACG00000016529 | ST6GALNAC3         | protein glycosylation, integral to Golgi membrane, sialyltransferase activity                                                                                                                                                                                                                                                                               |
| groupIII | 10626712 | 10750873 | Ca | n   | ENSGACG00000016532 | ST6GAL-C5-(1-of-2) | protein glycosylation, integral to Golgi membrane, sialyltransferase activity                                                                                                                                                                                                                                                                               |
| groupIII | 10805588 | 10830135 | Ca | n   | ENSGACG00000016538 | AK5                | signal transduction, nucleobase-containing compound metabolic process, ATP binding, nucleotide binding, nucleobase-containing compound kinase activity, nucleoside-triphosphatase activity, cAMP-dependent protein kinase regulator activity, nucleobase-containing compound metabolic process, ATP binding, nucleobase-containing compound kinase activity |
| groupIII | 10849623 | 10934254 | Ca | n   | ENSGACG00000016560 | FAM73A             | -                                                                                                                                                                                                                                                                                                                                                           |
| groupIII | 10849623 | 10934254 | Ca | n   | ENSGACG00000022857 | -                  | -                                                                                                                                                                                                                                                                                                                                                           |
| groupIII | 10849623 | 10934254 | Ca | n   | ENSGACG00000016567 | SLC25A24 (3 of 3)  | calcium ion binding                                                                                                                                                                                                                                                                                                                                         |
| groupIII | 10849623 | 10934254 | Ca | n   | ENSGACG00000016570 | DNAJB4             | protein folding, unfolded protein binding, heat shock protein binding                                                                                                                                                                                                                                                                                       |
| groupIII | 10849623 | 10934254 | Ca | n   | ENSGACG00000016582 | TXNDC12            | cell redox homeostasis                                                                                                                                                                                                                                                                                                                                      |
| groupIII | 10849623 | 10934254 | Ca | n   | ENSGACG00000016586 | BTF3L4 (2 of 2)    | -                                                                                                                                                                                                                                                                                                                                                           |
| groupIII | 10849623 | 10934254 | Ca | n   | ENSGACG00000016551 | USP33              | ubiquitin-dependent protein catabolic process, zinc ion binding, ubiquitin thiolesterase activity                                                                                                                                                                                                                                                           |
| groupIII | 10849623 | 10934254 | Ca | n   | ENSGACG00000016576 | GIPC2              | protein binding                                                                                                                                                                                                                                                                                                                                             |
| groupIII | 10849623 | 10934254 | Ca | n   | ENSGACG00000016595 | ZFYVE9 (1 of 3)    | methylation, nucleic acid binding, metal ion binding, methyltransferase activity                                                                                                                                                                                                                                                                            |
| groupIII | 10849623 | 10934254 | Ca | n   | ENSGACG00000016563 | FUBP1              | -                                                                                                                                                                                                                                                                                                                                                           |
| groupIII | 11244935 | 11263935 | Ca | psR | ENSGACG00000016672 | -                  | -                                                                                                                                                                                                                                                                                                                                                           |
| groupIV  | 18541913 | 18598794 | Ca | psR | ENSGACG00000018851 | -                  | integral to membrane                                                                                                                                                                                                                                                                                                                                        |
| groupIV  | 18541913 | 18598794 | Ca | psR | ENSGACG00000018853 | PUS7L              | pseudouridine synthesis, RNA modification, RNA binding, pseudouridine synthase activity                                                                                                                                                                                                                                                                     |
| groupIV  | 18541913 | 18598794 | Ca | psR | ENSGACG00000018852 | -                  | integral to membrane                                                                                                                                                                                                                                                                                                                                        |
| groupIV  | 19106685 | 19147353 | Ca | psR | -                  | -                  | -                                                                                                                                                                                                                                                                                                                                                           |
| groupIV  | 19368508 | 19464145 | Ca | bg  | ENSGACG00000018923 | DOCK4              | ATP binding, GTP binding, protein binding, guanyl-nucleotide exchange factor activity, GTPase binding                                                                                                                                                                                                                                                       |
| groupIV  | 19464803 | 19638023 | Ca | n   | ENSGACG00000018926 | LRRN3              | protein binding                                                                                                                                                                                                                                                                                                                                             |
| groupIV  | 19464803 | 19638023 | Ca | n   | ENSGACG00000018927 | -                  | -                                                                                                                                                                                                                                                                                                                                                           |
| groupIV  | 19464803 | 19638023 | Ca | n   | ENSGACG00000018929 | CALD1 (1 of 2)     | -                                                                                                                                                                                                                                                                                                                                                           |
| groupIV  | 19639233 | 19770357 | Ca | n   | ENSGACG00000018945 | TMEM209            | -                                                                                                                                                                                                                                                                                                                                                           |
| groupIV  | 19639233 | 19770357 | Ca | n   | ENSGACG00000018951 | -                  | cell cycle arrest, nucleus, cyclin-dependent protein kinase inhibitor activity                                                                                                                                                                                                                                                                              |
| groupIV  | 19639233 | 19770357 | Ca | n   | ENSGACG00000018953 | SLC37A3            | transmembrane transport, integral to membrane                                                                                                                                                                                                                                                                                                               |
| groupIV  | 19639233 | 19770357 | Ca | n   | ENSGACG00000018929 | CALD1 (1 of 2)     | -                                                                                                                                                                                                                                                                                                                                                           |
| groupIV  | 19639233 | 19770357 | Ca | n   | ENSGACG00000018935 | DHX57              | nucleic acid binding, zinc ion binding, ATP binding, protein binding, helicase activity, ATP-dependent helicase activity                                                                                                                                                                                                                                    |
| groupIV  | 19639233 | 19770357 | Ca | n   | ENSGACG00000018938 | FAM40B             | nucleobase-containing compound metabolic process, nucleic acid binding, nucleotide binding, DNA-directed DNA polymerase activity                                                                                                                                                                                                                            |
| groupIV  | 19639233 | 19770357 | Ca | n   | ENSGACG00000018942 | AHCYL2 (1 of 2)    | one-carbon metabolic process, adenosylhomocysteinase activity                                                                                                                                                                                                                                                                                               |
| groupIV  | 19639233 | 19770357 | Ca | n   | ENSGACG00000018950 | PRDM4              | -                                                                                                                                                                                                                                                                                                                                                           |
| groupIV  | 19639233 | 19770357 | Ca | n   | ENSGACG00000018930 | DNM1L (1 of 2)     | GTPase activity, GTP binding                                                                                                                                                                                                                                                                                                                                |
| groupIX  | 89398    | 103516   | Ca | n   | -                  | -                  | -                                                                                                                                                                                                                                                                                                                                                           |
| groupIX  | 16179366 | 16188484 | Ca | n   | ENSGACG00000019268 | ACOX1              | oxidation-reduction process, metabolic process, fatty acid beta-oxidation, peroxisome, oxidoreductase activity, acting on the CH-CH group of donors, acyl-CoA oxidase activity, acyl-CoA dehydrogenase activity                                                                                                                                             |
| groupV   | 3705816  | 3719313  | Ca | psR | ENSGACG00000003504 | C10orf2            | nucleotide binding, nucleoside-triphosphatase activity                                                                                                                                                                                                                                                                                                      |
| groupV   | 3971488  | 4042295  | Ca | psR | ENSGACG00000003707 | TMEM106A           | -                                                                                                                                                                                                                                                                                                                                                           |
| groupV   | 3971488  | 4042295  | Ca | psR | ENSGACG00000003710 | -                  | small GTPase mediated signal transduction, intracellular protein transport, protein transport, intracellular, GTP binding                                                                                                                                                                                                                                   |
| groupV   | 3971488  | 4042295  | Ca | psR | ENSGACG00000003702 | NBR1 (2 of 2)      | intracellular, zinc ion binding, protein binding                                                                                                                                                                                                                                                                                                            |
| groupV   | 3971488  | 4042295  | Ca | psR | ENSGACG00000003719 | SOST               | extracellular space                                                                                                                                                                                                                                                                                                                                         |
| groupV   | 4946095  | 4988621  | Ca | n   | ENSGACG00000004243 | MAPT (1 of 2)      | negative regulation of microtubule depolymerization                                                                                                                                                                                                                                                                                                         |
| groupV   | 4946095  | 4988621  | Ca | n   | ENSGACG00000004258 | KANSL1             | phosphoenolpyruvate-dependent sugar phosphotransferase system, sugar:hydrogen symporter activity                                                                                                                                                                                                                                                            |
| groupV   | 5681034  | 5709891  | Ca | n   | ENSGACG00000004597 | -                  | -                                                                                                                                                                                                                                                                                                                                                           |
| groupV   | 5681034  | 5709891  | Ca | n   | ENSGACG00000004617 | PDAP1              | -                                                                                                                                                                                                                                                                                                                                                           |
| groupV   | 5681034  | 5709891  | Ca | n   | ENSGACG00000004626 | CBY1               | -                                                                                                                                                                                                                                                                                                                                                           |
| groupV   | 5681034  | 5709891  | Ca | n   | ENSGACG00000004637 | PLBD1 (2 of 2)     | -                                                                                                                                                                                                                                                                                                                                                           |

|          |          |          |    |     |                     |                 |                                                                                                                                                                                                                                                                                |
|----------|----------|----------|----|-----|---------------------|-----------------|--------------------------------------------------------------------------------------------------------------------------------------------------------------------------------------------------------------------------------------------------------------------------------|
| groupV   | 5681034  | 5709891  | Ca | n   | ENSGACG00000004643  | KCTD17          | potassium ion transport, membrane, voltage-gated potassium channel complex, protein binding, voltage-gated potassium channel activity                                                                                                                                          |
| groupV   | 5681034  | 5709891  | Ca | n   | ENSGACG00000004601  | SH3BP1          | signal transduction, intracellular, cytoplasm, protein binding                                                                                                                                                                                                                 |
| groupV   | 5791653  | 5814653  | Ca | psR | ENSGACG00000004836  | EP300 (2 of 2)  | regulation of transcription, DNA-dependent, nucleus, transcription cofactor activity, zinc ion binding, protein binding, histone acetyltransferase activity, transcription coactivator activity                                                                                |
| groupV   | 12059810 | 12077810 | Ca | psL | ENSGACG000000010113 | -               | regulation of transcription, DNA-dependent, transcription initiation from RNA polymerase II promoter, DNA binding                                                                                                                                                              |
| groupV   | 12059810 | 12077810 | Ca | psL | ENSGACG000000010117 | -               | -                                                                                                                                                                                                                                                                              |
| groupV   | 12059810 | 12077810 | Ca | psL | ENSGACG000000010120 | ANKFN1          | protein binding                                                                                                                                                                                                                                                                |
| groupVI  | 5852309  | 5884101  | Ca | psR | ENSGACG00000004737  | RRBP1           | protein transport, integral to endoplasmic reticulum membrane                                                                                                                                                                                                                  |
| groupVI  | 5852309  | 5884101  | Ca | psR | ENSGACG00000004750  | -               | intracellular, actin binding                                                                                                                                                                                                                                                   |
| groupVI  | 5852309  | 5884101  | Ca | psR | ENSGACG00000004767  | CAPN2 (2 of 3)  | proteolysis, intracellular, calcium ion binding, cysteine-type endopeptidase activity, calcium-dependent cysteine-type endopeptidase activity                                                                                                                                  |
| groupVI  | 6869880  | 6914880  | Ca | n   | ENSGACG00000005596  | ERLEC1          | -                                                                                                                                                                                                                                                                              |
| groupVI  | 6869880  | 6914880  | Ca | n   | ENSGACG00000005682  | GPR75           | -                                                                                                                                                                                                                                                                              |
| groupVI  | 6869880  | 6914880  | Ca | n   | ENSGACG00000005686  | PSME4 (1 of 2)  | binding, protein binding                                                                                                                                                                                                                                                       |
| groupVI  | 6869880  | 6914880  | Ca | n   | ENSGACG00000005759  | WDR27           | protein binding                                                                                                                                                                                                                                                                |
| groupVI  | 11126533 | 11168385 | Ca | psL | ENSGACG000000009390 | SORCS3 (2 of 2) | integral to membrane                                                                                                                                                                                                                                                           |
| groupVI  | 11126533 | 11168385 | Ca | psL | ENSGACG000000009419 | SORCS1 (2 of 2) | integral to membrane                                                                                                                                                                                                                                                           |
| groupVI  | 11656170 | 11717339 | Ca | n   | ENSGACG000000009677 | METTL10         | metabolic process, tRNA modification, methyltransferase activity, tRNA (guanine-N7-)-methyltransferase activity                                                                                                                                                                |
| groupVI  | 11656170 | 11717339 | Ca | n   | ENSGACG000000009665 | FAM175B         | -                                                                                                                                                                                                                                                                              |
| groupVI  | 11656170 | 11717339 | Ca | n   | ENSGACG000000009695 | FAM53B (1 of 2) | -                                                                                                                                                                                                                                                                              |
| groupVI  | 11656170 | 11717339 | Ca | n   | ENSGACG000000009658 | ZRANB1 (2 of 2) | intracellular, zinc ion binding                                                                                                                                                                                                                                                |
| groupVII | 1804939  | 1834167  | Ca | psL | ENSGACG000000018948 | -               | binding, binding, binding                                                                                                                                                                                                                                                      |
| groupVII | 1804939  | 1834167  | Ca | psL | ENSGACG000000018949 | -               | transport, transmembrane transport, membrane                                                                                                                                                                                                                                   |
| groupVII | 1804939  | 1834167  | Ca | psL | ENSGACG000000018954 | -               | G-protein coupled receptor signaling pathway, integral to membrane                                                                                                                                                                                                             |
| groupVII | 1804939  | 1834167  | Ca | psL | ENSGACG000000018947 | -               | -                                                                                                                                                                                                                                                                              |
| groupVII | 1804939  | 1834167  | Ca | psL | ENSGACG000000018955 | -               | transport, sodium ion transport, transmembrane transport, chloride transport, membrane, integral to membrane, cation:chloride symporter activity                                                                                                                               |
| groupVII | 5838359  | 5931359  | Ca | n   | ENSGACG000000019528 | PTPRD (2 of 2)  | protein dephosphorylation, dephosphorylation, protein tyrosine phosphatase activity, phosphatase activity, protein binding, protein dephosphorylation, dephosphorylation, protein tyrosine phosphatase activity, phosphatase activity, protein binding                         |
| groupVII | 12605026 | 12752524 | Ca | psL | ENSGACG000000020164 | IRF2BP1         | -                                                                                                                                                                                                                                                                              |
| groupVII | 12605026 | 12752524 | Ca | psL | ENSGACG000000020165 | HNRNPL (2 of 2) | nucleic acid binding                                                                                                                                                                                                                                                           |
| groupVII | 12605026 | 12752524 | Ca | psL | ENSGACG000000020166 | -               | cell communication, calcium ion transport, transmembrane transport, membrane, integral to membrane, calcium:sodium antiporter activity, cell communication, calcium ion transport, transmembrane transport, membrane, integral to membrane, calcium:sodium antiporter activity |
| groupVII | 12605026 | 12752524 | Ca | psL | ENSGACG000000020168 | CKM (1 of 2)    | kinase activity, transferase activity, transferring phosphorus-containing groups                                                                                                                                                                                               |
| groupVII | 12605026 | 12752524 | Ca | psL | ENSGACG000000020171 | -               | regulation of phosphorylation, cytoplasm                                                                                                                                                                                                                                       |
| groupVII | 12605026 | 12752524 | Ca | psL | ENSGACG000000020174 | -               | calcium ion binding                                                                                                                                                                                                                                                            |
| groupVII | 12605026 | 12752524 | Ca | psL | ENSGACG000000020167 | NCCRP1          | protein catabolic process                                                                                                                                                                                                                                                      |
| groupVII | 12605026 | 12752524 | Ca | psL | ENSGACG000000020169 | MARK4 (2 of 2)  | protein phosphorylation, ATP binding, protein kinase activity, protein binding, transferase activity, transferring phosphorus-containing groups, protein serine/threonine kinase activity                                                                                      |
| groupVII | 12605026 | 12752524 | Ca | psL | ENSGACG000000020172 | -               | multicellular organismal development, cell communication, Notch signaling pathway, membrane, integral to membrane, calcium ion binding, protein binding                                                                                                                        |
| groupVII | 12605026 | 12752524 | Ca | psL | ENSGACG000000020173 | -IF1-(2-of-3)   | protein binding                                                                                                                                                                                                                                                                |
| groupVII | 12605026 | 12752524 | Ca | psL | ENSGACG000000020170 | -               | -                                                                                                                                                                                                                                                                              |
| groupVII | 16988582 | 17047582 | Ca | bg  | ENSGACG000000020323 | -               | nucleic acid binding, metal ion binding, hydrolase activity                                                                                                                                                                                                                    |
| groupVII | 16988582 | 17047582 | Ca | bg  | ENSGACG000000020324 | -               | -                                                                                                                                                                                                                                                                              |
| groupVII | 16988582 | 17047582 | Ca | bg  | ENSGACG000000020325 | KDM6B (2 of 2)  | fin regeneration, protein binding                                                                                                                                                                                                                                              |

|           |          |          |    |     |                    |                  |                                                                                                                                                                                                                                                                                                                                                                                                                                                                       |
|-----------|----------|----------|----|-----|--------------------|------------------|-----------------------------------------------------------------------------------------------------------------------------------------------------------------------------------------------------------------------------------------------------------------------------------------------------------------------------------------------------------------------------------------------------------------------------------------------------------------------|
| groupVII  | 16988582 | 17047582 | Ca | bg  | ENSGACG00000020322 | NLGN2 (2 of 2)   | -                                                                                                                                                                                                                                                                                                                                                                                                                                                                     |
| groupVII  | 16988582 | 17047582 | Ca | bg  | ENSGACG00000020327 | AIFM1            | oxidation-reduction process, oxidoreductase activity, flavin adenine dinucleotide binding, oxidation-reduction process, oxidoreductase activity, flavin adenine dinucleotide binding |
| groupVII  | 16988582 | 17047582 | Ca | bg  | ENSGACG00000020326 | GLRA4 (2 of 2)   | transport, ion transport, membrane, integral to membrane, postsynaptic membrane, extracellular ligand-gated ion channel activity, transport, ion transport, membrane, integral to membrane, postsynaptic membrane, extracellular ligand-gated ion channel activity                                                                                                                                                                                                    |
| groupVII  | 18658618 | 18672817 | Ca | -   | ENSGACG00000020445 | SSSCA1           | -                                                                                                                                                                                                                                                                                                                                                                                                                                                                     |
| groupVII  | 18658618 | 18672817 | Ca | -   | ENSGACG00000020446 | ARR3 (2 of 2)    | signal transduction, visual perception, signal transduction                                                                                                                                                                                                                                                                                                                                                                                                           |
| groupVII  | 18658618 | 18672817 | Ca | -   | ENSGACG00000020444 | EHBP1L1 (2 of 2) | protein binding,                                                                                                                                                                                                                                                                                                                                                                                                                                                      |
| groupVII  | 19290469 | 19381959 | Ca | psL | ENSGACG00000020500 | -                | membrane                                                                                                                                                                                                                                                                                                                                                                                                                                                              |
| groupVII  | 19290469 | 19381959 | Ca | psL | ENSGACG00000020501 | -                | membrane, tight junction, structural molecule activity, membrane, tight junction, structural molecule activity                                                                                                                                                                                                                                                                                                                                                        |
| groupVII  | 19290469 | 19381959 | Ca | psL | ENSGACG00000020502 | -                | membrane, tight junction, structural molecule activity                                                                                                                                                                                                                                                                                                                                                                                                                |
| groupVII  | 19290469 | 19381959 | Ca | psL | ENSGACG00000020503 | -                | membrane, integral to membrane, tight junction, structural molecule activity                                                                                                                                                                                                                                                                                                                                                                                          |
| groupVII  | 19290469 | 19381959 | Ca | psL | ENSGACG00000020504 | -                | membrane, tight junction, structural molecule activity                                                                                                                                                                                                                                                                                                                                                                                                                |
| groupVII  | 19290469 | 19381959 | Ca | psL | ENSGACG00000020506 | -                | membrane                                                                                                                                                                                                                                                                                                                                                                                                                                                              |
| groupVII  | 19290469 | 19381959 | Ca | psL | ENSGACG00000020507 | -                | cytoplasm, cytoskeleton, extrinsic to membrane, cytoskeletal protein binding                                                                                                                                                                                                                                                                                                                                                                                          |
| groupVII  | 19290469 | 19381959 | Ca | psL | ENSGACG00000020508 | WBSCR27 (1 of 2) | metabolic process, methyltransferase activity                                                                                                                                                                                                                                                                                                                                                                                                                         |
| groupVII  | 19290469 | 19381959 | Ca | psL | ENSGACG00000020509 | -                | protein binding                                                                                                                                                                                                                                                                                                                                                                                                                                                       |
| groupVII  | 19290469 | 19381959 | Ca | psL | ENSGACG00000020512 | SDF2             | membrane, membrane                                                                                                                                                                                                                                                                                                                                                                                                                                                    |
| groupVII  | 19290469 | 19381959 | Ca | psL | ENSGACG00000020505 | -                | membrane, integral to membrane, tight junction, structural molecule activity                                                                                                                                                                                                                                                                                                                                                                                          |
| groupVII  | 19290469 | 19381959 | Ca | psL | ENSGACG00000020510 | -                | protein binding                                                                                                                                                                                                                                                                                                                                                                                                                                                       |
| groupVII  | 19290469 | 19381959 | Ca | psL | ENSGACG00000020511 | -                | calcium ion binding                                                                                                                                                                                                                                                                                                                                                                                                                                                   |
| groupVII  | 19290469 | 19381959 | Ca | psL | ENSGACG00000020513 | SUPT6H           | embryonic heart tube development, otic vesicle development, heart development, somitogenesis, nucleobase-containing compound metabolic process, RNA binding, protein binding, hydrolase activity, acting on ester bonds                                                                                                                                                                                                                                               |
| groupVII  | 21390879 | 21499482 | Ca | psR | ENSGACG00000020612 | -                | transmembrane transport, drug transmembrane transport, membrane, drug transmembrane transporter activity, antiporter activity, transmembrane transport, drug transmembrane transport, membrane, drug transmembrane transporter activity, antiporter activity                                                                                                                                                                                                          |
| groupVII  | 21390879 | 21499482 | Ca | psR | ENSGACG00000020613 | -                | transmembrane transport, drug transmembrane transport, membrane, drug transmembrane transporter activity, antiporter activity, transmembrane transport, drug transmembrane transport, membrane, drug transmembrane transporter activity, antiporter activity                                                                                                                                                                                                          |
| groupVII  | 21390879 | 21499482 | Ca | psR | ENSGACG00000020614 | -                | transmembrane transport, drug transmembrane transport, membrane, drug transmembrane transporter activity, antiporter activity                                                                                                                                                                                                                                                                                                                                         |
| groupVII  | 21390879 | 21499482 | Ca | psR | ENSGACG00000020615 | -                | transmembrane transport, drug transmembrane transport, membrane, drug transmembrane transporter activity, antiporter activity                                                                                                                                                                                                                                                                                                                                         |
| groupVII  | 21390879 | 21499482 | Ca | psR | ENSGACG00000020616 | TMIGD1           | protein binding                                                                                                                                                                                                                                                                                                                                                                                                                                                       |
| groupVII  | 21925471 | 21967682 | Ca | n   | ENSGACG00000020655 | PURA             | double-stranded DNA binding                                                                                                                                                                                                                                                                                                                                                                                                                                           |
| groupVII  | 21925471 | 21967682 | Ca | n   | ENSGACG00000020656 | SH2D4A (2 of 2)  | -                                                                                                                                                                                                                                                                                                                                                                                                                                                                     |
| groupVII  | 21925471 | 21967682 | Ca | n   | ENSGACG00000020654 | NRG2 (1 of 2)    | embryo development, receptor binding, protein binding                                                                                                                                                                                                                                                                                                                                                                                                                 |
| groupVII  | 22530582 | 22575899 | Ca | n   | ENSGACG00000020696 | KC-B3-(1-of-2)   | potassium ion transport, cytoplasm, voltage-gated potassium channel activity, potassium ion transport, cytoplasm, voltage-gated potassium channel activity                                                                                                                                                                                                                                                                                                            |
| groupVII  | 22530582 | 22575899 | Ca | n   | ENSGACG00000020698 | CHRDL2           | dorsal/ventral pattern formation, protein binding, peptidase inhibitor activity, protein binding, peptidase inhibitor activity                                                                                                                                                                                                                                                                                                                                        |
| groupVII  | 22530582 | 22575899 | Ca | n   | ENSGACG00000020697 | NEU3             | -                                                                                                                                                                                                                                                                                                                                                                                                                                                                     |
| groupVII  | 26935378 | 26964299 | Ca | n   | ENSGACG00000020855 | RABEP1           | vesicle-mediated transport, cilium assembly, membrane, growth factor activity, GTPase activator activity, growth factor activity, GTPase activator activity                                                                                                                                                                                                                                                                                                           |
| groupVII  | 26935378 | 26964299 | Ca | n   | ENSGACG00000020856 | VPS37D           | -                                                                                                                                                                                                                                                                                                                                                                                                                                                                     |
| groupVIII | 1170952  | 1204952  | Ca | n   | ENSGACG00000003176 | -                | protein binding                                                                                                                                                                                                                                                                                                                                                                                                                                                       |
| groupVIII | 3398247  | 3435996  | Ca | -   | ENSGACG00000004896 | TBC1D7           | regulation of Rab GTPase activity, intracellular, Rab GTPase activator activity                                                                                                                                                                                                                                                                                                                                                                                       |
| groupVIII | 3398247  | 3435996  | Ca | -   | ENSGACG00000004923 | DSP (2 of 2)     | cytoskeleton, nucleotide binding                                                                                                                                                                                                                                                                                                                                                                                                                                      |
| groupVIII | 3398247  | 3435996  | Ca | -   | ENSGACG00000004884 | PHACTR1 (2 of 2) | regulation of transcription, DNA-dependent, transcription initiation, DNA-dependent, sequence-specific DNA binding transcription factor activity, DNA binding, sigma factor activity                                                                                                                                                                                                                                                                                  |

|           |          |          |    |     |                    |                 |                                                                                                                                                                                                                                                                                                                                        |
|-----------|----------|----------|----|-----|--------------------|-----------------|----------------------------------------------------------------------------------------------------------------------------------------------------------------------------------------------------------------------------------------------------------------------------------------------------------------------------------------|
| groupVIII | 3711279  | 3744471  | Ca | n   | ENSGACG00000005020 | GMDS            | cellular metabolic process, GDP-mannose metabolic process, retina layer formation, dorsal motor nucleus of vagus nerve development, vagus nerve development, Notch signaling pathway, intracellular, oxidoreductase activity, catalytic activity, coenzyme binding, GDP-mannose 4, 6-dehydratase activity, fucosyltransferase activity |
| groupVIII | 6746676  | 6792643  | Ca | psL | ENSGACG00000006461 | STXBP3          | vesicle-mediated transport, vesicle docking involved in exocytosis                                                                                                                                                                                                                                                                     |
| groupVIII | 6746676  | 6792643  | Ca | psL | ENSGACG00000006499 | -SP-(2-of-2)    | protein binding                                                                                                                                                                                                                                                                                                                        |
| groupVIII | 6746676  | 6792643  | Ca | psL | ENSGACG00000006451 | FNDC7 (1 of 3)  | protein binding                                                                                                                                                                                                                                                                                                                        |
| groupVIII | 6746676  | 6792643  | Ca | psL | ENSGACG00000006490 | ANKMY1          | zinc ion binding, protein binding                                                                                                                                                                                                                                                                                                      |
| groupVIII | 6746676  | 6792643  | Ca | psL | ENSGACG00000006515 | -               | membrane, proteinaceous extracellular matrix, heparan sulfate proteoglycan binding                                                                                                                                                                                                                                                     |
| groupVIII | 7018909  | 7121002  | Ca | bg  | ENSGACG00000006617 | C1orf52         | -                                                                                                                                                                                                                                                                                                                                      |
| groupVIII | 7018909  | 7121002  | Ca | bg  | ENSGACG00000006695 | ZNHIT6          | -                                                                                                                                                                                                                                                                                                                                      |
| groupVIII | 7018909  | 7121002  | Ca | bg  | ENSGACG00000006637 | COL24A1         | cell adhesion, collagen, extracellular matrix structural constituent, structural molecule activity                                                                                                                                                                                                                                     |
| groupVIII | 18766800 | 18790513 | Ca | n   | ENSGACG00000014307 | EXOC1           | -                                                                                                                                                                                                                                                                                                                                      |
| groupVIII | 18766800 | 18790513 | Ca | n   | ENSGACG00000014325 | CEP135          | -                                                                                                                                                                                                                                                                                                                                      |
| groupX    | 15139527 | 15189527 | Ca | bg  | ENSGACG00000009869 | -               | -                                                                                                                                                                                                                                                                                                                                      |
| groupX    | 15139527 | 15189527 | Ca | bg  | ENSGACG00000009862 | GRIK5 (1 of 2)  | membrane, ionotropic glutamate receptor activity, extracellular-glutamate-gated ion channel activity                                                                                                                                                                                                                                   |
| groupX    | 15363050 | 15657440 | Ca | bg  | ENSGACG00000010048 | -               | -                                                                                                                                                                                                                                                                                                                                      |
| groupX    | 15363050 | 15657440 | Ca | bg  | ENSGACG00000010061 | -               | -                                                                                                                                                                                                                                                                                                                                      |
| groupX    | 15363050 | 15657440 | Ca | bg  | ENSGACG00000010063 | JTB             | integral to membrane, integral to membrane                                                                                                                                                                                                                                                                                             |
| groupX    | 15363050 | 15657440 | Ca | bg  | ENSGACG00000010080 | CCT3            | protein folding, cellular protein metabolic process, embryonic eye morphogenesis, negative regulation of retinal cell programmed cell death, ATP binding, unfolded protein binding                                                                                                                                                     |
| groupX    | 15363050 | 15657440 | Ca | bg  | ENSGACG00000010328 | -               | DNA binding, protein binding                                                                                                                                                                                                                                                                                                           |
| groupX    | 15363050 | 15657440 | Ca | bg  | ENSGACG00000010333 | -               | -                                                                                                                                                                                                                                                                                                                                      |
| groupX    | 15363050 | 15657440 | Ca | bg  | ENSGACG00000010334 | -               | -                                                                                                                                                                                                                                                                                                                                      |
| groupX    | 15363050 | 15657440 | Ca | bg  | ENSGACG00000010341 | INTS3           | -                                                                                                                                                                                                                                                                                                                                      |
| groupX    | 15363050 | 15657440 | Ca | bg  | ENSGACG00000010358 | -               | intracellular signal transduction, cyclic nucleotide biosynthetic process, phosphorus-oxygen lyase activity                                                                                                                                                                                                                            |
| groupX    | 15363050 | 15657440 | Ca | bg  | ENSGACG00000010381 | RTL1            | -                                                                                                                                                                                                                                                                                                                                      |
| groupX    | 15363050 | 15657440 | Ca | bg  | ENSGACG00000010409 | LRP12           | protein binding                                                                                                                                                                                                                                                                                                                        |
| groupX    | 15363050 | 15657440 | Ca | bg  | ENSGACG00000010420 | BOP1            | rRNA processing, nucleus, protein binding                                                                                                                                                                                                                                                                                              |
| groupX    | 15363050 | 15657440 | Ca | bg  | ENSGACG00000010448 | -               | -                                                                                                                                                                                                                                                                                                                                      |
| groupX    | 15363050 | 15657440 | Ca | bg  | ENSGACG00000010456 | -               | -                                                                                                                                                                                                                                                                                                                                      |
| groupX    | 15363050 | 15657440 | Ca | bg  | ENSGACG00000010045 | -               | -                                                                                                                                                                                                                                                                                                                                      |
| groupX    | 15363050 | 15657440 | Ca | bg  | ENSGACG00000010051 | -               | intracellular, nucleic acid binding, DNA binding, zinc ion binding                                                                                                                                                                                                                                                                     |
| groupX    | 15363050 | 15657440 | Ca | bg  | ENSGACG00000010069 | C1orf85         | -                                                                                                                                                                                                                                                                                                                                      |
| groupX    | 15363050 | 15657440 | Ca | bg  | ENSGACG00000010314 | -               | cell redox homeostasis, endoplasmic reticulum, isomerase activity                                                                                                                                                                                                                                                                      |
| groupX    | 15363050 | 15657440 | Ca | bg  | ENSGACG00000010362 | -               | protein phosphorylation, ATP binding, protein kinase activity, transferase activity, transferring phosphorus-containing groups, protein serine/threonine kinase activity                                                                                                                                                               |
| groupX    | 15363050 | 15657440 | Ca | bg  | ENSGACG00000010376 | -               | protein binding                                                                                                                                                                                                                                                                                                                        |
| groupX    | 15363050 | 15657440 | Ca | bg  | ENSGACG00000010384 | -               | DNA repair, intracellular, DNA binding, zinc ion binding                                                                                                                                                                                                                                                                               |
| groupX    | 15363050 | 15657440 | Ca | bg  | ENSGACG00000010388 | DNAI2           | protein binding, protein binding                                                                                                                                                                                                                                                                                                       |
| groupX    | 15363050 | 15657440 | Ca | bg  | ENSGACG00000010415 | WDYHV1          | -                                                                                                                                                                                                                                                                                                                                      |
| groupX    | 15363050 | 15657440 | Ca | bg  | ENSGACG00000010434 | HSF1            | regulation of transcription, DNA-dependent, nucleus, sequence-specific DNA binding transcription factor activity, DNA binding, sequence-specific DNA binding                                                                                                                                                                           |
| groupXI   | 0        | 26231    | Ca | psL | ENSGACG00000004178 | ALDOA (1 of 2)  | glycolysis, fructose-bisphosphate aldolase activity                                                                                                                                                                                                                                                                                    |
| groupXI   | 0        | 26231    | Ca | psL | ENSGACG00000004234 | GPS1            | protein binding                                                                                                                                                                                                                                                                                                                        |
| groupXI   | 682193   | 749234   | Ca | bg  | ENSGACG00000005008 | -               | protein binding                                                                                                                                                                                                                                                                                                                        |
| groupXI   | 682193   | 749234   | Ca | bg  | ENSGACG00000005084 | PSMD11 (1 of 2) | protein binding                                                                                                                                                                                                                                                                                                                        |
| groupXI   | 682193   | 749234   | Ca | bg  | ENSGACG00000005117 | DLX3 (2 of 2)   | regulation of transcription, DNA-dependent, nucleus, sequence-specific DNA binding transcription factor activity, sequence-specific DNA binding, protein binding                                                                                                                                                                       |

|          |          |          |    |     |                    |                  |                                                                                                                                                                                                                                                  |
|----------|----------|----------|----|-----|--------------------|------------------|--------------------------------------------------------------------------------------------------------------------------------------------------------------------------------------------------------------------------------------------------|
| groupXI  | 682193   | 749234   | Ca | bg  | ENSGACG00000005125 | -                | -                                                                                                                                                                                                                                                |
| groupXI  | 682193   | 749234   | Ca | bg  | ENSGACG00000005060 | RPAIN            | -                                                                                                                                                                                                                                                |
| groupXI  | 682193   | 749234   | Ca | bg  | ENSGACG00000005120 | DLX4 (2 of 2)    | regulation of transcription, DNA-dependent, nucleus, sequence-specific DNA binding transcription factor activity, sequence-specific DNA binding, protein binding                                                                                 |
| groupXI  | 750788   | 911811   | Ca | bg  | ENSGACG00000005126 | -GS-(2-of-2)     | cellular amino acid biosynthetic process                                                                                                                                                                                                         |
| groupXI  | 750788   | 911811   | Ca | bg  | ENSGACG00000005130 | -GS-(1-of-2)     | arginine biosynthetic process                                                                                                                                                                                                                    |
| groupXI  | 750788   | 911811   | Ca | bg  | ENSGACG00000005131 | B4GALNT2         | -                                                                                                                                                                                                                                                |
| groupXI  | 750788   | 911811   | Ca | bg  | ENSGACG00000005138 | -                | -                                                                                                                                                                                                                                                |
| groupXI  | 750788   | 911811   | Ca | bg  | ENSGACG00000005139 | -                | intracellular, DNA binding, zinc ion binding, binding                                                                                                                                                                                            |
| groupXI  | 750788   | 911811   | Ca | bg  | ENSGACG00000005143 | COL1A1 (2 of 2)  | signal transduction, regulation of ossification, collagen, cytoplasm, extracellular matrix structural constituent, receptor binding, protein binding, peptidase inhibitor activity                                                               |
| groupXI  | 1809317  | 1845492  | Ca | n   | -                  | -                | -                                                                                                                                                                                                                                                |
| groupXI  | 1876491  | 2024038  | Ca | n   | ENSGACG00000005654 | PRAF2            | -                                                                                                                                                                                                                                                |
| groupXI  | 1876491  | 2024038  | Ca | n   | ENSGACG00000002243 | -                | -                                                                                                                                                                                                                                                |
| groupXI  | 1876491  | 2024038  | Ca | n   | ENSGACG00000005722 | PDK2 (1 of 2)    | signal transduction, peptidyl-histidine phosphorylation, ATP binding, two-component sensor activity, protein histidine kinase activity                                                                                                           |
| groupXI  | 1876491  | 2024038  | Ca | n   | ENSGACG00000005637 | CBX1 (2 of 2)    | -                                                                                                                                                                                                                                                |
| groupXI  | 1876491  | 2024038  | Ca | n   | ENSGACG00000005644 | NFE2L1 (2 of 2)  | regulation of transcription, DNA-dependent, sequence-specific DNA binding transcription factor activity, DNA binding, sequence-specific DNA binding, protein dimerization activity                                                               |
| groupXI  | 1876491  | 2024038  | Ca | n   | ENSGACG00000005661 | COPZ2            | transport                                                                                                                                                                                                                                        |
| groupXI  | 1876491  | 2024038  | Ca | n   | ENSGACG00000005720 | PRR15L (2 of 2)  | -                                                                                                                                                                                                                                                |
| groupXI  | 2024649  | 2171900  | Ca | n   | ENSGACG00000005722 | PDK2 (1 of 2)    | signal transduction, peptidyl-histidine phosphorylation, ATP binding, two-component sensor activity, protein histidine kinase activity                                                                                                           |
| groupXI  | 2024649  | 2171900  | Ca | n   | ENSGACG00000005761 | -                | proteasome activator complex                                                                                                                                                                                                                     |
| groupXI  | 2024649  | 2171900  | Ca | n   | ENSGACG00000005755 | KCNC3 (2 of 2)   | potassium ion transport, ion transport, transmembrane transport, membrane, voltage-gated potassium channel complex, protein binding, ion channel activity, voltage-gated potassium channel activity                                              |
| groupXI  | 3068370  | 3116429  | Ca | psL | ENSGACG00000006540 | THRA (2 of 2)    | regulation of transcription, DNA-dependent, steroid hormone mediated signaling pathway, nucleus, sequence-specific DNA binding transcription factor activity, steroid hormone receptor activity, zinc ion binding, sequence-specific DNA binding |
| groupXI  | 7313397  | 7391397  | Ca | n   | ENSGACG00000009661 | NDUFA4 (1 of 2)  | -                                                                                                                                                                                                                                                |
| groupXI  | 7313397  | 7391397  | Ca | n   | ENSGACG00000009684 | SLC35B1          | transmembrane transport                                                                                                                                                                                                                          |
| groupXI  | 7313397  | 7391397  | Ca | n   | ENSGACG00000009718 | FAM117A (1 of 2) | -                                                                                                                                                                                                                                                |
| groupXI  | 7313397  | 7391397  | Ca | n   | ENSGACG00000009738 | RNF113B          | nucleic acid binding, zinc ion binding, protein binding                                                                                                                                                                                          |
| groupXI  | 7313397  | 7391397  | Ca | n   | ENSGACG00000009767 | STRADA           | protein phosphorylation, ATP binding, protein kinase activity, transferase activity, transferring phosphorus-containing groups, protein serine/threonine kinase activity                                                                         |
| groupXI  | 7313397  | 7391397  | Ca | n   | ENSGACG00000009722 | RUNDC3A (2 of 2) | -                                                                                                                                                                                                                                                |
| groupXI  | 7313397  | 7391397  | Ca | n   | ENSGACG00000009736 | -                | binding                                                                                                                                                                                                                                          |
| groupXI  | 7313397  | 7391397  | Ca | n   | ENSGACG00000009782 | DDX42            | nucleic acid binding, ATP binding, helicase activity, ATP-dependent helicase activity                                                                                                                                                            |
| groupXI  | 13652918 | 13675918 | Ca | n   | ENSGACG00000013889 | -                | iron ion binding, heme binding                                                                                                                                                                                                                   |
| groupXI  | 13652918 | 13675918 | Ca | n   | ENSGACG00000013891 | -                | iron ion binding, heme binding                                                                                                                                                                                                                   |
| groupXI  | 13652918 | 13675918 | Ca | n   | ENSGACG00000013895 | -                | iron ion binding, heme binding                                                                                                                                                                                                                   |
| groupXI  | 13652918 | 13675918 | Ca | n   | ENSGACG00000013902 | -                | iron ion binding, heme binding                                                                                                                                                                                                                   |
| groupXI  | 13652918 | 13675918 | Ca | n   | ENSGACG00000013918 | -                | iron ion binding, heme binding                                                                                                                                                                                                                   |
| groupXI  | 13652918 | 13675918 | Ca | n   | ENSGACG00000013930 | NPRL3            | -                                                                                                                                                                                                                                                |
| groupXI  | 13652918 | 13675918 | Ca | n   | ENSGACG00000013945 | MPG              | base-excision repair, DNA binding, catalytic activity, alkylbase DNA N-glycosylase activity                                                                                                                                                      |
| groupXII | 815557   | 832573   | Ca | n   | -                  | -                | -                                                                                                                                                                                                                                                |
| groupXII | 9989286  | 10046399 | Ca | n   | ENSGACG00000007655 | -                | protein binding                                                                                                                                                                                                                                  |
| groupXII | 9989286  | 10046399 | Ca | n   | ENSGACG00000007674 | -                | protein binding                                                                                                                                                                                                                                  |
| groupXII | 9989286  | 10046399 | Ca | n   | ENSGACG00000007705 | GNAT3            | signal transduction, G-protein coupled receptor signaling pathway, detection of light stimulus involved in visual perception, signal transducer activity, guanyl nucleotide binding                                                              |
| groupXII | 9989286  | 10046399 | Ca | n   | ENSGACG00000007643 | EPS8L3 (1 of 2)  | protein binding                                                                                                                                                                                                                                  |



|           |          |          |    |     |                     |                  |                                                                                                                                                                                                                                                                                                                                                                  |
|-----------|----------|----------|----|-----|---------------------|------------------|------------------------------------------------------------------------------------------------------------------------------------------------------------------------------------------------------------------------------------------------------------------------------------------------------------------------------------------------------------------|
| groupXII  | 9989286  | 10046399 | Ca | n   | ENSGACG00000007691  | AMPD2 (1 of 2)   | purine ribonucleoside monophosphate biosynthetic process, deaminase activity, AMP deaminase activity                                                                                                                                                                                                                                                             |
| groupXII  | 9989286  | 10046399 | Ca | n   | ENSGACG00000007741  | -                | signal transduction, G-protein coupled receptor signaling pathway, small GTPase mediated signal transduction, intracellular, signal transducer activity, GTP binding, guanyl nucleotide binding                                                                                                                                                                  |
| groupXII  | 10115006 | 10166512 | Ca | n   | ENSGACG00000007903  | -                | -                                                                                                                                                                                                                                                                                                                                                                |
| groupXII  | 10115006 | 10166512 | Ca | n   | ENSGACG00000007907  | KCNC4            | potassium ion transport, ion transport, transmembrane transport, membrane, voltage-gated potassium channel complex, protein binding, ion channel activity, voltage-gated potassium channel activity                                                                                                                                                              |
| groupXII  | 10115006 | 10166512 | Ca | n   | ENSGACG00000007894  | AHCYL1 (1 of 2)  | one-carbon metabolic process, adenosylhomocysteinase activity                                                                                                                                                                                                                                                                                                    |
| groupXII  | 10115006 | 10166512 | Ca | n   | ENSGACG00000007913  | SLC6A17 (2 of 2) | neurotransmitter transport, integral to membrane, neurotransmitter:sodium symporter activity                                                                                                                                                                                                                                                                     |
| groupXII  | 11072495 | 11110495 | Ca | n   | ENSGACG00000008964  | ZNF385A (1 of 2) | intracellular, nucleic acid binding, zinc ion binding                                                                                                                                                                                                                                                                                                            |
| groupXII  | 11072495 | 11110495 | Ca | n   | ENSGACG00000008969  | -                | -                                                                                                                                                                                                                                                                                                                                                                |
| groupXII  | 12132540 | 12197373 | Ca | n   | ENSGACG00000009752  | PKP1 (1 of 2)    | binding, protein binding                                                                                                                                                                                                                                                                                                                                         |
| groupXII  | 12132540 | 12197373 | Ca | n   | ENSGACG00000009758  | TEAD3 (2 of 2)   | regulation of transcription, DNA-dependent, nucleus, sequence-specific DNA binding transcription factor activity, protein binding                                                                                                                                                                                                                                |
| groupXII  | 12132540 | 12197373 | Ca | n   | ENSGACG000000022180 | -                | -                                                                                                                                                                                                                                                                                                                                                                |
| groupXII  | 12132540 | 12197373 | Ca | n   | ENSGACG000000022196 | -                | -                                                                                                                                                                                                                                                                                                                                                                |
| groupXII  | 12132540 | 12197373 | Ca | n   | ENSGACG00000009805  | -                | regulation of transcription, DNA-dependent, sequence-specific DNA binding transcription factor activity, sequence-specific DNA binding                                                                                                                                                                                                                           |
| groupXII  | 12132540 | 12197373 | Ca | n   | ENSGACG00000009806  | LGR6             | G-protein coupled receptor signaling pathway, integral to membrane, protein binding                                                                                                                                                                                                                                                                              |
| groupXII  | 14768943 | 14848436 | Ca | n   | ENSGACG00000011155  | TNFRSF11A        | external side of plasma membrane, binding, CD154 receptor binding                                                                                                                                                                                                                                                                                                |
| groupXII  | 14768943 | 14848436 | Ca | n   | ENSGACG00000011160  | -                | regulation of transcription, DNA-dependent, embryonic retina morphogenesis in camera-type eye, hindbrain morphogenesis, retina layer formation, hindbrain development, neuron differentiation, nucleus, sequence-specific DNA binding transcription factor activity, DNA binding, sequence-specific DNA binding, protein binding                                 |
| groupXII  | 14768943 | 14848436 | Ca | n   | ENSGACG00000011163  | -                | protein binding                                                                                                                                                                                                                                                                                                                                                  |
| groupXII  | 14768943 | 14848436 | Ca | n   | ENSGACG00000011168  | PLEKHG5          | regulation of Rho protein signal transduction, intracellular, protein binding, Rho guanyl-nucleotide exchange factor activity                                                                                                                                                                                                                                    |
| groupXIII | 2114566  | 2169566  | Ca | n   | ENSGACG00000004641  | LIPG             | protein binding                                                                                                                                                                                                                                                                                                                                                  |
| groupXIII | 2114566  | 2169566  | Ca | n   | ENSGACG00000004685  | SLC20A2          | phosphate ion transport, membrane, inorganic phosphate transmembrane transporter activity                                                                                                                                                                                                                                                                        |
| groupXIII | 2114566  | 2169566  | Ca | n   | ENSGACG00000004678  | KCMF1 (2 of 2)   | intracellular, zinc ion binding                                                                                                                                                                                                                                                                                                                                  |
| groupXIII | 8277165  | 8296165  | Ca | n   | ENSGACG00000008235  | -                | -                                                                                                                                                                                                                                                                                                                                                                |
| groupXIII | 8277165  | 8296165  | Ca | n   | ENSGACG00000008222  | HIP1R            | actin binding, phospholipid binding                                                                                                                                                                                                                                                                                                                              |
| groupXIII | 10629917 | 10684029 | Ca | psL | ENSGACG00000010293  | WDR54            | protein binding                                                                                                                                                                                                                                                                                                                                                  |
| groupXIII | 10629917 | 10684029 | Ca | psL | ENSGACG00000010296  | NOL6             | pathogenesis, RNA binding, hydrolase activity, acting on ester bonds, ribosome binding                                                                                                                                                                                                                                                                           |
| groupXIII | 10629917 | 10684029 | Ca | psL | ENSGACG00000010311  | -                | DNA binding, protein dimerization activity                                                                                                                                                                                                                                                                                                                       |
| groupXIII | 11040110 | 11131282 | Ca | n   | ENSGACG00000010397  | FAM172A          | protein folding, endoplasmic reticulum, calcium ion binding, unfolded protein binding                                                                                                                                                                                                                                                                            |
| groupXIV  | 6240210  | 6284277  | Ca | n   | ENSGACG00000016869  | BMPR1B (2 of 2)  | protein phosphorylation, membrane, ATP binding, protein kinase activity, transferase activity, transferring phosphorus-containing groups, transmembrane receptor protein serine/threonine kinase activity, transforming growth factor beta-activated receptor activity, protein serine/threonine kinase activity                                                 |
| groupXIV  | 6240210  | 6284277  | Ca | n   | ENSGACG00000016879  | PDLIM5 (1 of 2)  | zinc ion binding, protein binding                                                                                                                                                                                                                                                                                                                                |
| groupXIV  | 11324616 | 11342791 | Ca | bg  | ENSGACG00000018121  | GRIN1            | transport, membrane, outer membrane-bounded periplasmic space, transporter activity, ionotropic glutamate receptor activity, extracellular-glutamate-gated ion channel activity, transport, membrane, outer membrane-bounded periplasmic space, transporter activity, ionotropic glutamate receptor activity, extracellular-glutamate-gated ion channel activity |
| groupXIV  | 11412157 | 11469157 | Ca | n   | ENSGACG00000018142  | GTF3C4           | -                                                                                                                                                                                                                                                                                                                                                                |
| groupXIV  | 14722480 | 14891949 | Ca | n   | ENSGACG00000018624  | SLC38A9          | -                                                                                                                                                                                                                                                                                                                                                                |
| groupXIV  | 14722480 | 14891949 | Ca | n   | ENSGACG00000018575  | HMGCS1           | metabolic process, isoprenoid biosynthetic process, catalytic activity, hydroxymethylglutaryl-CoA synthase activity                                                                                                                                                                                                                                              |
| groupXIV  | 14722480 | 14891949 | Ca | n   | ENSGACG00000018584  | TLN1             | cell adhesion, cytoskeleton, actin cytoskeleton, actin binding, structural molecule activity                                                                                                                                                                                                                                                                     |
| groupXIV  | 14722480 | 14891949 | Ca | n   | ENSGACG00000018619  | IL6ST            | protein binding                                                                                                                                                                                                                                                                                                                                                  |
| groupXIV  | 14722480 | 14891949 | Ca | n   | ENSGACG00000018632  | NRG1             | embryo development, receptor binding, protein binding                                                                                                                                                                                                                                                                                                            |
| groupXIV  | 14722480 | 14891949 | Ca | n   | ENSGACG00000018599  | TPM2             | signal transduction, intracellular                                                                                                                                                                                                                                                                                                                               |
| groupXV   | 4900646  | 4979783  | Ca | n   | ENSGACG00000007827  | NGB              | response to hypoxia, iron ion binding, heme binding                                                                                                                                                                                                                                                                                                              |
| groupXV   | 4900646  | 4979783  | Ca | n   | ENSGACG00000007850  | ZDHHC22          | regulation of transcription, DNA-dependent, nucleus, sequence-specific DNA binding transcription factor activity, zinc ion binding                                                                                                                                                                                                                               |

|           |          |          |    |     |                    |                 |                                                                                                                                                                                                                                                                                                                                                 |
|-----------|----------|----------|----|-----|--------------------|-----------------|-------------------------------------------------------------------------------------------------------------------------------------------------------------------------------------------------------------------------------------------------------------------------------------------------------------------------------------------------|
| groupXV   | 4900646  | 4979783  | Ca | n   | ENSGACG00000007852 | PGF             | membrane, growth factor activity                                                                                                                                                                                                                                                                                                                |
| groupXV   | 4900646  | 4979783  | Ca | n   | ENSGACG00000007781 | COQ6            | oxidation-reduction process, ubiquinone biosynthetic process, monoxygenase activity, flavin adenine dinucleotide binding, oxidoreductase activity, acting on paired donors, with incorporation or reduction of molecular oxygen, NADH or NADPH as one donor, and incorporation of one atom of oxygen                                            |
| groupXV   | 4900646  | 4979783  | Ca | n   | ENSGACG00000007840 | TMEM63C         | membrane                                                                                                                                                                                                                                                                                                                                        |
| groupXV   | 4900646  | 4979783  | Ca | n   | ENSGACG00000007855 | SLC35F4         | membrane, binding                                                                                                                                                                                                                                                                                                                               |
| groupXV   | 4982178  | 5046634  | Ca | n   | ENSGACG00000007869 | AP5M1           | intracellular protein transport, vesicle-mediated transport, clathrin adaptor complex, protein binding                                                                                                                                                                                                                                          |
| groupXV   | 4982178  | 5046634  | Ca | n   | ENSGACG00000007896 | EXOC5           | pronephros development, determination of left/right symmetry, exocytosis, vesicle docking, cytoplasm                                                                                                                                                                                                                                            |
| groupXV   | 4982178  | 5046634  | Ca | n   | ENSGACG00000007855 | SLC35F4         | membrane, binding                                                                                                                                                                                                                                                                                                                               |
| groupXV   | 7356346  | 7404588  | Ca | psR | ENSGACG00000009488 | NIPAL3          | -                                                                                                                                                                                                                                                                                                                                               |
| groupXV   | 7356346  | 7404588  | Ca | psR | ENSGACG00000009482 | RCAN3           | calcium-mediated signaling                                                                                                                                                                                                                                                                                                                      |
| groupXV   | 7356346  | 7404588  | Ca | psR | ENSGACG00000009501 | GRHL3           | -                                                                                                                                                                                                                                                                                                                                               |
| groupXV   | 13423851 | 13611254 | Ca | psL | ENSGACG00000012839 | -               | protein phosphorylation, transmembrane receptor protein tyrosine kinase signaling pathway, membrane, ATP binding, protein kinase activity, transferase activity, transferring phosphorus-containing groups, protein serine/threonine kinase activity, transmembrane receptor protein tyrosine kinase activity, protein tyrosine kinase activity |
| groupXVI  | 5326551  | 5394349  | Ca | psL | -                  | -               | -                                                                                                                                                                                                                                                                                                                                               |
| groupXVI  | 12042939 | 12117939 | Ca | bg  | ENSGACG00000006314 | -               | -                                                                                                                                                                                                                                                                                                                                               |
| groupXVI  | 12042939 | 12117939 | Ca | bg  | ENSGACG00000006317 | MXRA5 (2 of 2)  | protein binding                                                                                                                                                                                                                                                                                                                                 |
| groupXVI  | 12042939 | 12117939 | Ca | bg  | ENSGACG00000006325 | ARSE            | metabolic process, catalytic activity, sulfuric ester hydrolase activity                                                                                                                                                                                                                                                                        |
| groupXVII | 3084684  | 3257913  | Ca | n   | ENSGACG00000005003 | IGFN1 (3 of 5)  | protein binding                                                                                                                                                                                                                                                                                                                                 |
| groupXVII | 3084684  | 3257913  | Ca | n   | ENSGACG00000005005 | IGFN1 (5 of 5)  | protein binding                                                                                                                                                                                                                                                                                                                                 |
| groupXVII | 3084684  | 3257913  | Ca | n   | ENSGACG00000005015 | SYT2 (1 of 2)   | protein binding                                                                                                                                                                                                                                                                                                                                 |
| groupXVII | 3084684  | 3257913  | Ca | n   | ENSGACG00000005023 | -               | carbohydrate metabolic process, protein binding, phosphotransferase activity, alcohol group as acceptor                                                                                                                                                                                                                                         |
| groupXVII | 3084684  | 3257913  | Ca | n   | ENSGACG00000004954 | GRM4 (2 of 2)   | regulation of transcription, DNA-dependent, G-protein coupled receptor signaling pathway, integral to membrane, intracellular, sequence-specific DNA binding transcription factor activity, G-protein coupled receptor activity, sequence-specific DNA binding                                                                                  |
| groupXVII | 3084684  | 3257913  | Ca | n   | ENSGACG00000004985 | IGFN1 (4 of 5)  | extracellular region, hormone activity, protein binding                                                                                                                                                                                                                                                                                         |
| groupXVII | 3084684  | 3257913  | Ca | n   | ENSGACG00000004994 | IGFN1 (2 of 5)  | carbohydrate metabolic process, protein binding, phosphotransferase activity, alcohol group as acceptor                                                                                                                                                                                                                                         |
| groupXVII | 5569784  | 5608831  | Ca | n   | ENSGACG00000006741 | C12orf10        | -                                                                                                                                                                                                                                                                                                                                               |
| groupXVII | 5569784  | 5608831  | Ca | n   | ENSGACG00000006817 | -               | protein binding                                                                                                                                                                                                                                                                                                                                 |
| groupXVII | 5569784  | 5608831  | Ca | n   | ENSGACG00000006819 | COL2A1 (1 of 2) | signal transduction, collagen, extracellular matrix structural constituent, receptor binding, protein binding, peptidase inhibitor activity                                                                                                                                                                                                     |
| groupXVII | 5706588  | 5748654  | Ca | psL | ENSGACG00000006994 | SHISA5          | -                                                                                                                                                                                                                                                                                                                                               |
| groupXVII | 5706588  | 5748654  | Ca | psL | ENSGACG00000006983 | ITGA7           | -                                                                                                                                                                                                                                                                                                                                               |
| groupXVII | 7810659  | 7838659  | Ca | n   | -                  | -               | -                                                                                                                                                                                                                                                                                                                                               |
| groupXVII | 7998539  | 8027681  | Ca | n   | ENSGACG00000008650 | CRYBB3 (2 of 2) | -                                                                                                                                                                                                                                                                                                                                               |
| groupXVII | 7998539  | 8027681  | Ca | n   | ENSGACG00000008653 | -               | -                                                                                                                                                                                                                                                                                                                                               |
| groupXVII | 7998539  | 8027681  | Ca | n   | ENSGACG00000008628 | CIT             | intracellular signal transduction, protein phosphorylation, metabolic process, ATP binding, protein kinase activity, catalytic activity, protein binding, transferase activity, transferring phosphorus-containing groups, protein serine/threonine kinase activity, small GTPase regulator activity                                            |
| groupXVII | 8493517  | 8644989  | Ca | bg  | ENSGACG00000008905 | GLRX            | cell redox homeostasis, electron carrier activity, protein disulfide oxidoreductase activity                                                                                                                                                                                                                                                    |
| groupXVII | 8493517  | 8644989  | Ca | bg  | ENSGACG00000008945 | -               | protein binding                                                                                                                                                                                                                                                                                                                                 |
| groupXVII | 8493517  | 8644989  | Ca | bg  | ENSGACG00000008960 | -               | -                                                                                                                                                                                                                                                                                                                                               |
| groupXVII | 8493517  | 8644989  | Ca | bg  | ENSGACG00000009018 | -               | intracellular, nucleic acid binding, zinc ion binding                                                                                                                                                                                                                                                                                           |
| groupXVII | 8493517  | 8644989  | Ca | bg  | ENSGACG00000009021 | -               | multicellular organismal development, camera-type eye development, brain development, extracellular region, hormone activity                                                                                                                                                                                                                    |
| groupXVII | 8493517  | 8644989  | Ca | bg  | ENSGACG00000008899 | RHOBTB3         | protein binding                                                                                                                                                                                                                                                                                                                                 |
| groupXVII | 8493517  | 8644989  | Ca | bg  | ENSGACG00000008926 | PCSK1           | proteolysis, serine-type endopeptidase activity                                                                                                                                                                                                                                                                                                 |
| groupXVII | 8493517  | 8644989  | Ca | bg  | ENSGACG00000008930 | CAST            | -                                                                                                                                                                                                                                                                                                                                               |
| groupXVII | 8493517  | 8644989  | Ca | bg  | ENSGACG00000008967 | DNAH8           | proteolysis, microtubule-based movement, dynein complex, ATP binding, nucleotide binding, ATPase activity, cysteine-type endopeptidase activity, nucleoside-triphosphatase activity, microtubule motor activity                                                                                                                                 |

|            |          |          |    |     |                    |                 |                                                                                                                                                                                                                                                                                                                   |
|------------|----------|----------|----|-----|--------------------|-----------------|-------------------------------------------------------------------------------------------------------------------------------------------------------------------------------------------------------------------------------------------------------------------------------------------------------------------|
| groupXVII  | 8493517  | 8644989  | Ca | bg  | ENSGACG00000008906 | ELL2            | nucleotide binding                                                                                                                                                                                                                                                                                                |
| groupXVII  | 8493517  | 8644989  | Ca | bg  | ENSGACG00000009034 | PTPRA           | protein dephosphorylation, dephosphorylation, regulation of protein kinase activity, convergent extension involved in gastrulation, retina development in camera-type eye, protein tyrosine phosphatase activity, phosphatase activity                                                                            |
| groupXVII  | 8649227  | 8676321  | Ca | psR | ENSGACG00000009049 | IDH3B           | oxidation-reduction process, tricarboxylic acid cycle, magnesium ion binding, NAD binding, oxidoreductase activity, acting on the CH-OH group of donors, NAD or NADP as acceptor, isocitrate dehydrogenase (NAD+) activity                                                                                        |
| groupXVII  | 8649227  | 8676321  | Ca | psR | ENSGACG00000009111 | WDR1            | protein binding                                                                                                                                                                                                                                                                                                   |
| groupXVII  | 8649227  | 8676321  | Ca | psR | ENSGACG00000009129 | SLC2A9          | transport, transmembrane transport, membrane, integral to membrane, transporter activity, substrate-specific transmembrane transporter activity, transmembrane transporter activity, transport, transmembrane transport, membrane, integral to membrane, transporter activity, transmembrane transporter activity |
| groupXVII  | 8649227  | 8676321  | Ca | psR | ENSGACG00000009034 | PTPRA           | protein dephosphorylation, dephosphorylation, regulation of protein kinase activity, convergent extension involved in gastrulation, retina development in camera-type eye, protein tyrosine phosphatase activity, phosphatase activity                                                                            |
| groupXVII  | 8684309  | 8701309  | Ca | psR | ENSGACG00000009129 | SLC2A9          | transport, transmembrane transport, membrane, integral to membrane, transporter activity, substrate-specific transmembrane transporter activity, transmembrane transporter activity, transport, transmembrane transport, membrane, integral to membrane, transporter activity, transmembrane transporter activity |
| groupXVII  | 9097537  | 9111537  | Ca | n   | ENSGACG00000009341 | MAG11 (1 of 2)  | protein binding                                                                                                                                                                                                                                                                                                   |
| groupXVII  | 9377111  | 9709696  | Ca | psR | ENSGACG00000009434 | TMF1            | -                                                                                                                                                                                                                                                                                                                 |
| groupXVII  | 9377111  | 9709696  | Ca | psR | ENSGACG00000009496 | FGD5 (2 of 2)   | regulation of Rho protein signal transduction, intracellular, metal ion binding, binding, protein binding, Rho guanyl-nucleotide exchange factor activity                                                                                                                                                         |
| groupXVII  | 9377111  | 9709696  | Ca | psR | ENSGACG00000009440 | UBA3 (1 of 2)   | cellular protein modification process, ATP binding, catalytic activity, small protein activating enzyme activity                                                                                                                                                                                                  |
| groupXVII  | 9377111  | 9709696  | Ca | psR | ENSGACG00000009541 | SFMBT1          | regulation of transcription, DNA-dependent, nucleus, sequence-specific DNA binding, protein binding                                                                                                                                                                                                               |
| groupXVII  | 9377111  | 9709696  | Ca | psR | ENSGACG00000009400 | EOGT            | transferase activity, transferring glycosyl groups                                                                                                                                                                                                                                                                |
| groupXVII  | 9377111  | 9709696  | Ca | psR | ENSGACG00000009511 | PRKCD (2 of 2)  | intracellular signal transduction, protein phosphorylation, ATP binding, protein kinase activity, protein binding, transferase activity, transferring phosphorus-containing groups, protein serine/threonine kinase activity                                                                                      |
| groupXVII  | 9377111  | 9709696  | Ca | psR | ENSGACG00000009393 | -               | -                                                                                                                                                                                                                                                                                                                 |
| groupXVII  | 11389652 | 11476067 | Ca | n   | ENSGACG00000010974 | -               | -                                                                                                                                                                                                                                                                                                                 |
| groupXVII  | 11389652 | 11476067 | Ca | n   | ENSGACG00000010977 | NUCKS1          | -                                                                                                                                                                                                                                                                                                                 |
| groupXVII  | 11389652 | 11476067 | Ca | n   | ENSGACG00000010962 | MFSD4 (1 of 2)  | -                                                                                                                                                                                                                                                                                                                 |
| groupXVII  | 11389652 | 11476067 | Ca | n   | ENSGACG00000010970 | ELK4            | regulation of transcription, DNA-dependent, sequence-specific DNA binding transcription factor activity, sequence-specific DNA binding                                                                                                                                                                            |
| groupXVII  | 11389652 | 11476067 | Ca | n   | ENSGACG00000010953 | CDK18           | -                                                                                                                                                                                                                                                                                                                 |
| groupXVIII | 8455554  | 8484969  | Ca | -   | ENSGACG00000008882 | CEP57L1         | -                                                                                                                                                                                                                                                                                                                 |
| groupXVIII | 8455554  | 8484969  | Ca | -   | ENSGACG00000008895 | SESN1           | cell cycle arrest, determination of left/right symmetry, nucleus                                                                                                                                                                                                                                                  |
| groupXVIII | 8579077  | 8659466  | Ca | n   | ENSGACG00000008921 | SNX3            | cell communication, phosphatidylinositol binding, protein binding                                                                                                                                                                                                                                                 |
| groupXVIII | 8579077  | 8659466  | Ca | n   | ENSGACG00000008950 | OSTM1           | -                                                                                                                                                                                                                                                                                                                 |
| groupXVIII | 8579077  | 8659466  | Ca | n   | ENSGACG00000008916 | LACE1 (2 of 2)  | ATP binding, nucleotide binding, nucleoside-triphosphatase activity                                                                                                                                                                                                                                               |
| groupXVIII | 8579077  | 8659466  | Ca | n   | ENSGACG00000008934 | NR2E1           | regulation of transcription, DNA-dependent, steroid hormone mediated signaling pathway, nucleus, sequence-specific DNA binding transcription factor activity, steroid hormone receptor activity, zinc ion binding, sequence-specific DNA binding                                                                  |
| groupXVIII | 8579077  | 8659466  | Ca | n   | ENSGACG00000008956 | OTOF (1 of 2)   | integral to membrane, protein binding                                                                                                                                                                                                                                                                             |
| groupXVIII | 16233395 | 16266397 | Ca | n   | ENSGACG00000013807 | CCR6 (1 of 2)   | G-protein coupled receptor signaling pathway, integral to membrane                                                                                                                                                                                                                                                |
| groupXVIII | 16233395 | 16266397 | Ca | n   | ENSGACG00000013799 | KIF26A (2 of 2) | microtubule-based movement, ATP binding, microtubule motor activity                                                                                                                                                                                                                                               |
| groupXVIII | 16233395 | 16266397 | Ca | n   | ENSGACG00000013808 | FGFR1OP         | protein binding                                                                                                                                                                                                                                                                                                   |
| groupXX    | 1130999  | 1238921  | Ca | n   | ENSGACG00000003528 | VPS13B (1 of 3) | protein binding                                                                                                                                                                                                                                                                                                   |
| groupXX    | 1245211  | 1269211  | Ca | psR | -                  | -               | -                                                                                                                                                                                                                                                                                                                 |
| groupXX    | 1381478  | 1419534  | Ca | n   | ENSGACG00000003671 | NCALD           | calcium ion binding                                                                                                                                                                                                                                                                                               |
| groupXX    | 8888372  | 8911980  | Ca | n   | ENSGACG00000007563 | -               | regulation of Rab GTPase activity, intracellular, Rab GTPase activator activity                                                                                                                                                                                                                                   |
| groupXX    | 8888372  | 8911980  | Ca | n   | ENSGACG00000007594 | CTRL            | proteolysis, catalytic activity, serine-type endopeptidase activity                                                                                                                                                                                                                                               |
| groupXX    | 8888372  | 8911980  | Ca | n   | ENSGACG00000007597 | -               | G-protein coupled receptor signaling pathway, integral to membrane                                                                                                                                                                                                                                                |
| groupXX    | 8888372  | 8911980  | Ca | n   | ENSGACG00000007600 | LIN37           | -                                                                                                                                                                                                                                                                                                                 |

|         |          |          |    |     |                    |                  |                                                                                                                                                                                                                                                                                                                                                                                           |
|---------|----------|----------|----|-----|--------------------|------------------|-------------------------------------------------------------------------------------------------------------------------------------------------------------------------------------------------------------------------------------------------------------------------------------------------------------------------------------------------------------------------------------------|
| groupXX | 8888372  | 8911980  | Ca | n   | ENSGACG00000007569 | -                | -                                                                                                                                                                                                                                                                                                                                                                                         |
| groupXX | 13280249 | 13430768 | Ca | psR | ENSGACG00000012131 | TUFT1 (2 of 2)   | -                                                                                                                                                                                                                                                                                                                                                                                         |
| groupXX | 13280249 | 13430768 | Ca | psR | ENSGACG00000012154 | AQP10 (2 of 2)   | transport, transmembrane transport, water transport, arsenite transport, glycerol transport, urea transmembrane transport, ion transmembrane transport, membrane, integral to membrane, transporter activity, water transmembrane transporter activity, glycerol transmembrane transporter activity, arsenite transmembrane transporter activity, urea transmembrane transporter activity |
| groupXX | 13280249 | 13430768 | Ca | psR | ENSGACG00000012156 | ATP8B2           | ATP biosynthetic process, phospholipid transport, membrane, integral to membrane, magnesium ion binding, ATP binding, ATPase activity, coupled to transmembrane movement of ions, phosphorylative mechanism, phospholipid-translocating ATPase activity                                                                                                                                   |
| groupXX | 13280249 | 13430768 | Ca | psR | ENSGACG00000012171 | -                | -                                                                                                                                                                                                                                                                                                                                                                                         |
| groupXX | 13280249 | 13430768 | Ca | psR | ENSGACG00000012175 | ZNF687 (2 of 2)  | intracellular, zinc ion binding                                                                                                                                                                                                                                                                                                                                                           |
| groupXX | 13280249 | 13430768 | Ca | psR | ENSGACG00000012231 | ECM1             | extracellular region, extracellular space                                                                                                                                                                                                                                                                                                                                                 |
| groupXX | 13280249 | 13430768 | Ca | psR | ENSGACG00000012239 | RORC             | -                                                                                                                                                                                                                                                                                                                                                                                         |
| groupXX | 13280249 | 13430768 | Ca | psR | ENSGACG00000012243 | THEM4            | -                                                                                                                                                                                                                                                                                                                                                                                         |
| groupXX | 13280249 | 13430768 | Ca | psR | ENSGACG00000012247 | -                | -                                                                                                                                                                                                                                                                                                                                                                                         |
| groupXX | 13280249 | 13430768 | Ca | psR | ENSGACG00000012251 | -                | -                                                                                                                                                                                                                                                                                                                                                                                         |
| groupXX | 13280249 | 13430768 | Ca | psR | ENSGACG00000022251 | -                | -                                                                                                                                                                                                                                                                                                                                                                                         |
| groupXX | 13280249 | 13430768 | Ca | psR | ENSGACG00000012254 | NBN              | oxidation-reduction process, intracellular, oxidoreductase activity, protein binding                                                                                                                                                                                                                                                                                                      |
| groupXX | 13280249 | 13430768 | Ca | psR | ENSGACG00000012271 | OSGIN2           | -                                                                                                                                                                                                                                                                                                                                                                                         |
| groupXX | 13280249 | 13430768 | Ca | psR | ENSGACG00000012277 | GTPBP10          | intracellular, GTP binding                                                                                                                                                                                                                                                                                                                                                                |
| groupXX | 13280249 | 13430768 | Ca | psR | ENSGACG00000012147 | C1orf43 (2 of 2) | -                                                                                                                                                                                                                                                                                                                                                                                         |
| groupXX | 13280249 | 13430768 | Ca | psR | ENSGACG00000012182 | PSMD4 (1 of 2)   | phosphatidylinositol metabolic process, protein binding, phosphatidylinositol phosphate kinase activity                                                                                                                                                                                                                                                                                   |
| groupXX | 13280249 | 13430768 | Ca | psR | ENSGACG00000012292 | -                | proteolysis, zinc ion binding, metalloendopeptidase activity, protein binding                                                                                                                                                                                                                                                                                                             |
| groupXX | 13737344 | 13775527 | Ca | psR | ENSGACG00000012464 | -                | -                                                                                                                                                                                                                                                                                                                                                                                         |
| groupXX | 13737344 | 13775527 | Ca | psR | ENSGACG00000012467 | IGLON5           | protein binding                                                                                                                                                                                                                                                                                                                                                                           |
| groupXX | 18375162 | 18395709 | Ca | n   | ENSGACG00000014132 | GRIK2 (1 of 2)   | membrane, ionotropic glutamate receptor activity, extracellular-glutamate-gated ion channel activity                                                                                                                                                                                                                                                                                      |
| groupXX | 18396301 | 18427488 | Ca | n   | ENSGACG00000014132 | GRIK2 (1 of 2)   | membrane, ionotropic glutamate receptor activity, extracellular-glutamate-gated ion channel activity                                                                                                                                                                                                                                                                                      |
| groupXX | 18431079 | 18498760 | Ca | n   | ENSGACG00000014132 | GRIK2 (1 of 2)   | membrane, ionotropic glutamate receptor activity, extracellular-glutamate-gated ion channel activity                                                                                                                                                                                                                                                                                      |
| groupI  | 3640578  | 3668766  | No | psL | -                  | -                | -                                                                                                                                                                                                                                                                                                                                                                                         |
| groupI  | 6669196  | 6684212  | No | psR | ENSGACG00000008129 | GRIA4 (2 of 2)   | transport, membrane, outer membrane-bounded periplasmic space, transporter activity, ionotropic glutamate receptor activity, extracellular-glutamate-gated ion channel activity                                                                                                                                                                                                           |
| groupI  | 7066648  | 7073648  | No | n   | ENSGACG00000008344 | -                | nucleic acid binding, zinc ion binding                                                                                                                                                                                                                                                                                                                                                    |
| groupI  | 10551080 | 10634322 | No | n   | ENSGACG00000010309 | -                | -                                                                                                                                                                                                                                                                                                                                                                                         |
| groupI  | 10551080 | 10634322 | No | n   | ENSGACG00000010316 | -                | G-protein coupled receptor signaling pathway, integral to membrane, G-protein coupled receptor activity                                                                                                                                                                                                                                                                                   |
| groupI  | 10551080 | 10634322 | No | n   | ENSGACG00000010322 | -                | G-protein coupled receptor signaling pathway, integral to membrane, G-protein coupled receptor activity                                                                                                                                                                                                                                                                                   |
| groupI  | 10551080 | 10634322 | No | n   | ENSGACG00000010302 | GPR149           | G-protein coupled receptor signaling pathway, integral to membrane                                                                                                                                                                                                                                                                                                                        |
| groupI  | 10551080 | 10634322 | No | n   | ENSGACG00000010305 | MME              | proteolysis, metalloendopeptidase activity, metallopeptidase activity                                                                                                                                                                                                                                                                                                                     |
| groupI  | 10551080 | 10634322 | No | n   | ENSGACG00000010323 | -                | G-protein coupled receptor signaling pathway, integral to membrane, G-protein coupled receptor activity                                                                                                                                                                                                                                                                                   |
| groupI  | 10551080 | 10634322 | No | n   | ENSGACG00000010313 | -                | G-protein coupled receptor signaling pathway, integral to membrane, G-protein coupled receptor activity                                                                                                                                                                                                                                                                                   |
| groupI  | 10635564 | 10686564 | No | psR | ENSGACG00000010326 | -                | G-protein coupled receptor signaling pathway, integral to membrane, G-protein coupled receptor activity                                                                                                                                                                                                                                                                                   |
| groupI  | 10635564 | 10686564 | No | psR | ENSGACG00000010329 | -                | G-protein coupled receptor signaling pathway, integral to membrane, G-protein coupled receptor activity                                                                                                                                                                                                                                                                                   |
| groupI  | 10635564 | 10686564 | No | psR | ENSGACG00000010323 | -                | G-protein coupled receptor signaling pathway, integral to membrane, G-protein coupled receptor activity                                                                                                                                                                                                                                                                                   |
| groupI  | 10635564 | 10686564 | No | psR | ENSGACG00000010337 | -                | G-protein coupled receptor signaling pathway, integral to membrane, G-protein coupled receptor activity                                                                                                                                                                                                                                                                                   |
| groupI  | 10810499 | 10833499 | No | psL | ENSGACG00000010386 | C3orf33          | nucleic acid binding, hydrolase activity, acting on ester bonds                                                                                                                                                                                                                                                                                                                           |
| groupI  | 10810499 | 10833499 | No | psL | ENSGACG00000010389 | MED13 (2 of 2)   | regulation of transcription from RNA polymerase II promoter, mediator complex                                                                                                                                                                                                                                                                                                             |
| groupI  | 14084293 | 14127684 | No | psR | ENSGACG00000011821 | GBE1             | carbohydrate metabolic process, catalytic activity, hydrolase activity, hydrolyzing O-glycosyl compounds, cation binding                                                                                                                                                                                                                                                                  |
| groupI  | 14460461 | 14503461 | No | n   | ENSGACG00000011982 | GUCA1C (2 of 2)  | calcium ion binding                                                                                                                                                                                                                                                                                                                                                                       |
| groupI  | 14460461 | 14503461 | No | n   | ENSGACG00000012003 | THRSP            | -                                                                                                                                                                                                                                                                                                                                                                                         |
| groupI  | 14460461 | 14503461 | No | n   | ENSGACG00000012006 | RAB30            | signal transduction, GTP catabolic process, small GTPase mediated signal transduction, intracellular protein transport, nucleocytoplasmic transport, protein transport, intracellular, GTPase activity, GTP binding                                                                                                                                                                       |

|         |          |          |    |     |                    |                   |                                                                                                                                                                                                                                                                                                                  |
|---------|----------|----------|----|-----|--------------------|-------------------|------------------------------------------------------------------------------------------------------------------------------------------------------------------------------------------------------------------------------------------------------------------------------------------------------------------|
| groupI  | 14460461 | 14503461 | No | n   | ENSGACG00000012026 | PRCP              | proteolysis, serine-type peptidase activity                                                                                                                                                                                                                                                                      |
| groupI  | 14460461 | 14503461 | No | n   | ENSGACG00000012067 | FAM181B           | -                                                                                                                                                                                                                                                                                                                |
| groupI  | 14867532 | 14986925 | No | psR | ENSGACG00000012165 | ARHGAP42 (1 of 2) | signal transduction, intracellular, protein binding                                                                                                                                                                                                                                                              |
| groupI  | 14867532 | 14986925 | No | psR | ENSGACG00000012176 | CNTN5             | protein binding                                                                                                                                                                                                                                                                                                  |
| groupI  | 14992970 | 15025971 | No | bg  | ENSGACG00000012227 | FBXO40 (1 of 3)   | zinc ion binding, protein binding                                                                                                                                                                                                                                                                                |
| groupI  | 14992970 | 15025971 | No | bg  | ENSGACG00000012229 | TTC36             | protein binding                                                                                                                                                                                                                                                                                                  |
| groupI  | 15040178 | 15140178 | No | psR | ENSGACG00000012236 | PVRL1 (1 of 2)    | protein binding                                                                                                                                                                                                                                                                                                  |
| groupI  | 15141068 | 15188452 | No | psR | ENSGACG00000012245 | -                 | -                                                                                                                                                                                                                                                                                                                |
| groupI  | 15141068 | 15188452 | No | psR | ENSGACG00000012236 | PVRL1 (1 of 2)    | protein binding                                                                                                                                                                                                                                                                                                  |
| groupI  | 16149136 | 16166665 | No | psR | -                  | -                 | -                                                                                                                                                                                                                                                                                                                |
| groupI  | 16208580 | 16247580 | No | psR | ENSGACG00000012627 | -                 | -                                                                                                                                                                                                                                                                                                                |
| groupI  | 16208580 | 16247580 | No | psR | ENSGACG00000012628 | -                 | RNA binding                                                                                                                                                                                                                                                                                                      |
| groupI  | 16773172 | 16844435 | No | n   | ENSGACG00000013006 | NAPA              | intracellular protein transport                                                                                                                                                                                                                                                                                  |
| groupI  | 16773172 | 16844435 | No | n   | ENSGACG00000013015 | GLTSCR1           | -                                                                                                                                                                                                                                                                                                                |
| groupI  | 16773172 | 16844435 | No | n   | ENSGACG00000013042 | NUP88             | -                                                                                                                                                                                                                                                                                                                |
| groupI  | 16773172 | 16844435 | No | n   | ENSGACG00000013044 | PSMD8             | -                                                                                                                                                                                                                                                                                                                |
| groupI  | 16773172 | 16844435 | No | n   | ENSGACG00000013085 | DHX34             | nuclear-transcribed mRNA catabolic process, nonsense-mediated decay, embryo development, nucleic acid binding, ATP binding, electron carrier activity, metal ion binding, nucleotide binding, helicase activity, nucleoside-triphosphatase activity                                                              |
| groupI  | 16773172 | 16844435 | No | n   | ENSGACG00000013023 | EHD2 (1 of 2)     | calcium ion binding, GTPase activity, GTP binding, protein binding                                                                                                                                                                                                                                               |
| groupI  | 16773172 | 16844435 | No | n   | ENSGACG00000013083 | SPRED3            | -                                                                                                                                                                                                                                                                                                                |
| groupI  | 16773172 | 16844435 | No | n   | ENSGACG00000013091 | ST14 (1 of 3)     | proteolysis, epidermis development, catalytic activity, protein binding, serine-type endopeptidase activity                                                                                                                                                                                                      |
| groupI  | 16773172 | 16844435 | No | n   | ENSGACG00000012993 | BCKDHA            | metabolic process, oxidoreductase activity, acting on the aldehyde or oxo group of donors, disulfide as acceptor                                                                                                                                                                                                 |
| groupI  | 17422835 | 17443056 | No | psR | ENSGACG00000013367 | INTS4             | binding, protein binding                                                                                                                                                                                                                                                                                         |
| groupI  | 17422835 | 17443056 | No | psR | ENSGACG00000013383 | KCTD14            | potassium ion transport, membrane, voltage-gated potassium channel complex, protein binding, voltage-gated potassium channel activity                                                                                                                                                                            |
| groupI  | 17538140 | 17770140 | No | n   | ENSGACG00000013412 | -                 | transposition, DNA-mediated, DNA binding, transposase activity                                                                                                                                                                                                                                                   |
| groupI  | 20065969 | 20119969 | No | bg  | ENSGACG00000013815 | FAM117B           | -                                                                                                                                                                                                                                                                                                                |
| groupI  | 20065969 | 20119969 | No | bg  | ENSGACG00000013817 | BMPR2 (1 of 2)    | protein phosphorylation, membrane, ATP binding, protein kinase activity, transferase activity, transferring phosphorus-containing groups, transmembrane receptor protein serine/threonine kinase activity, transforming growth factor beta-activated receptor activity, protein serine/threonine kinase activity |
| groupI  | 20065969 | 20119969 | No | bg  | ENSGACG00000013821 | DOCK9 (2 of 2)    | GTP binding, protein binding, guanyl-nucleotide exchange factor activity, GTPase binding                                                                                                                                                                                                                         |
| groupI  | 24086139 | 24129140 | No | n   | -                  | -                 | -                                                                                                                                                                                                                                                                                                                |
| groupI  | 26157890 | 26282104 | No | psR | ENSGACG00000015207 | NLGN4Y            | -                                                                                                                                                                                                                                                                                                                |
| groupI  | 27084804 | 27134192 | No | psL | ENSGACG00000015339 | DGKZ (2 of 2)     | intracellular signal transduction, protein kinase C-activating G-protein coupled receptor signaling pathway, catalytic activity, protein binding, flavin adenine dinucleotide binding, diacylglycerol kinase activity                                                                                            |
| groupI  | 27084804 | 27134192 | No | psL | ENSGACG00000015348 | MDK               | growth factor activity                                                                                                                                                                                                                                                                                           |
| groupI  | 27084804 | 27134192 | No | psL | ENSGACG00000015349 | CHRM4             | G-protein coupled receptor signaling pathway, integral to membrane                                                                                                                                                                                                                                               |
| groupI  | 27239156 | 27275751 | No | n   | ENSGACG00000015358 | -                 | -                                                                                                                                                                                                                                                                                                                |
| groupI  | 27239156 | 27275751 | No | n   | ENSGACG00000015361 | -                 | G-protein coupled receptor signaling pathway, integral to membrane                                                                                                                                                                                                                                               |
| groupII | 4718324  | 4744324  | No | psR | -                  | -                 | -                                                                                                                                                                                                                                                                                                                |
| groupII | 6023477  | 6086478  | No | n   | ENSGACG00000015100 | ACE2              | proteolysis, membrane, metalloproteinase activity, peptidyl-dipeptidase activity                                                                                                                                                                                                                                 |
| groupII | 6023477  | 6086478  | No | n   | ENSGACG00000015112 | -                 | extracellular space                                                                                                                                                                                                                                                                                              |
| groupII | 6023477  | 6086478  | No | n   | ENSGACG00000015118 | PIR               | -                                                                                                                                                                                                                                                                                                                |
| groupII | 6023477  | 6086478  | No | n   | ENSGACG00000015113 | -                 | -                                                                                                                                                                                                                                                                                                                |
| groupII | 6023477  | 6086478  | No | n   | ENSGACG00000015098 | NHS (2 of 2)      | -                                                                                                                                                                                                                                                                                                                |
| groupII | 7849386  | 7923689  | No | psR | ENSGACG00000015368 | GPC5              | membrane, proteinaceous extracellular matrix, protein binding, heparan sulfate proteoglycan binding                                                                                                                                                                                                              |
| groupII | 9299140  | 9314140  | No | n   | -                  | -                 | -                                                                                                                                                                                                                                                                                                                |
| groupII | 10573694 | 10618736 | No | psR | ENSGACG00000015752 | RPL13             | translation, regulation of cell cycle, intracellular, ribosome, structural constituent of ribosome                                                                                                                                                                                                               |

|          |          |          |    |     |                    |                  |                                                                                                                                                                                                                                                                                                                                                                        |
|----------|----------|----------|----|-----|--------------------|------------------|------------------------------------------------------------------------------------------------------------------------------------------------------------------------------------------------------------------------------------------------------------------------------------------------------------------------------------------------------------------------|
| groupII  | 10573694 | 10618736 | No | psR | ENSGACG00000015754 | CPNE7            | protein binding, protein binding                                                                                                                                                                                                                                                                                                                                       |
| groupII  | 10625190 | 10639190 | No | bg  | ENSGACG00000015773 | -                | G-protein coupled receptor signaling pathway, integral to membrane                                                                                                                                                                                                                                                                                                     |
| groupII  | 10625190 | 10639190 | No | bg  | ENSGACG00000015774 | CYB5B            | heme binding, heme binding                                                                                                                                                                                                                                                                                                                                             |
| groupII  | 10625190 | 10639190 | No | bg  | ENSGACG00000015776 | DHX38            | -                                                                                                                                                                                                                                                                                                                                                                      |
| groupII  | 10709045 | 10807045 | No | bg  | ENSGACG00000015779 | ZFXH3            | regulation of transcription, DNA-dependent, metal ion transport, nucleus, intracellular, sequence-specific DNA binding transcription factor activity, nucleic acid binding, zinc ion binding, metal ion binding, sequence-specific DNA binding, protein binding                                                                                                        |
| groupII  | 11181167 | 11200167 | No | bg  | ENSGACG00000015799 | MTMR10           | dephosphorylation, phosphatase activity                                                                                                                                                                                                                                                                                                                                |
| groupII  | 11181167 | 11200167 | No | bg  | ENSGACG00000015798 | ZNF821           | intracellular, DNA binding, zinc ion binding                                                                                                                                                                                                                                                                                                                           |
| groupII  | 11359686 | 11383686 | No | psR | ENSGACG00000015829 | GCOM1            | -                                                                                                                                                                                                                                                                                                                                                                      |
| groupII  | 11634168 | 11663168 | No | n   | ENSGACG00000015872 | TRADD            | signal transduction, positive regulation of I-kappaB kinase/NF-kappaB cascade, induction of apoptosis, cytoplasm, signal transducer activity, protein binding, signal transduction, positive regulation of I-kappaB kinase/NF-kappaB cascade, induction of apoptosis, positive regulation of apoptotic process, cytoplasm, signal transducer activity, protein binding |
| groupII  | 11634168 | 11663168 | No | n   | ENSGACG00000015873 | G-O1-(2-of-2)    | signal transduction, G-protein coupled receptor signaling pathway, small GTPase mediated signal transduction, intracellular, signal transducer activity, GTP binding, guanyl nucleotide binding                                                                                                                                                                        |
| groupII  | 11634168 | 11663168 | No | n   | ENSGACG00000015876 | -                | -                                                                                                                                                                                                                                                                                                                                                                      |
| groupII  | 11634168 | 11663168 | No | n   | ENSGACG00000015877 | GIN1             | -                                                                                                                                                                                                                                                                                                                                                                      |
| groupII  | 11634168 | 11663168 | No | n   | ENSGACG00000015875 | COG4             | -                                                                                                                                                                                                                                                                                                                                                                      |
| groupII  | 12186277 | 12212277 | No | psL | -                  | -                | -                                                                                                                                                                                                                                                                                                                                                                      |
| groupII  | 12618205 | 12654205 | No | psL | ENSGACG00000015990 | -                | -                                                                                                                                                                                                                                                                                                                                                                      |
| groupIII | 2643074  | 2666074  | No | n   | -                  | -                | -                                                                                                                                                                                                                                                                                                                                                                      |
| groupIII | 7153675  | 7171062  | No | psR | ENSGACG00000022187 | -                | -                                                                                                                                                                                                                                                                                                                                                                      |
| groupIII | 11312635 | 11328635 | No | psL | ENSGACG00000016677 | -                | protein dephosphorylation, dephosphorylation, membrane, protein tyrosine phosphatase activity, phosphatase activity, protein binding                                                                                                                                                                                                                                   |
| groupIII | 12706686 | 12732686 | No | n   | ENSGACG00000017050 | -                | binding                                                                                                                                                                                                                                                                                                                                                                |
| groupIII | 12706686 | 12732686 | No | n   | ENSGACG00000017052 | -                | protein binding                                                                                                                                                                                                                                                                                                                                                        |
| groupIII | 12706686 | 12732686 | No | n   | ENSGACG00000017045 | -                | binding                                                                                                                                                                                                                                                                                                                                                                |
| groupIV  | 4779983  | 4817541  | No | bg  | -                  | -                | -                                                                                                                                                                                                                                                                                                                                                                      |
| groupIV  | 5928008  | 5941366  | No | n   | ENSGACG00000017204 | FGF13            | growth factor activity                                                                                                                                                                                                                                                                                                                                                 |
| groupIV  | 6766536  | 6832536  | No | psR | ENSGACG00000017466 | TNMD             | -                                                                                                                                                                                                                                                                                                                                                                      |
| groupIV  | 7048628  | 7124333  | No | psL | -                  | -                | -                                                                                                                                                                                                                                                                                                                                                                      |
| groupIV  | 7919856  | 7938856  | No | bg  | ENSGACG00000017524 | SFXN5 (2 of 2)   | transmembrane transport, cation transport, membrane, cation transmembrane transporter activity                                                                                                                                                                                                                                                                         |
| groupIV  | 7919856  | 7938856  | No | bg  | ENSGACG00000017521 | SMYD5            | protein binding                                                                                                                                                                                                                                                                                                                                                        |
| groupIV  | 8515346  | 8529697  | No | psR | ENSGACG00000017689 | TSC22D3          | regulation of transcription, DNA-dependent, sequence-specific DNA binding transcription factor activity                                                                                                                                                                                                                                                                |
| groupIV  | 8559406  | 9007176  | No | psR | ENSGACG00000017692 | PCDH11Y          | cell adhesion, homophilic cell adhesion, membrane, plasma membrane, calcium ion binding                                                                                                                                                                                                                                                                                |
| groupIV  | 8559406  | 9007176  | No | psR | ENSGACG00000017694 | KLHL4            | protein binding                                                                                                                                                                                                                                                                                                                                                        |
| groupIV  | 9078127  | 9110127  | No | bg  | ENSGACG00000017717 | -                | transport, ion transport, membrane, integral to membrane, postsynaptic membrane, extracellular ligand-gated ion channel activity                                                                                                                                                                                                                                       |
| groupIV  | 9078127  | 9110127  | No | bg  | ENSGACG00000017720 | CHRNA3 (1 of 2)  | transport, ion transport, membrane, integral to membrane, postsynaptic membrane, extracellular ligand-gated ion channel activity                                                                                                                                                                                                                                       |
| groupIV  | 9326969  | 9401969  | No | psR | ENSGACG00000017836 | -                | protein binding                                                                                                                                                                                                                                                                                                                                                        |
| groupIV  | 9326969  | 9401969  | No | psR | ENSGACG00000017837 | SLC43A3 (2 of 2) | -                                                                                                                                                                                                                                                                                                                                                                      |
| groupIV  | 9326969  | 9401969  | No | psR | ENSGACG00000017843 | -                | -                                                                                                                                                                                                                                                                                                                                                                      |
| groupIV  | 9326969  | 9401969  | No | psR | ENSGACG00000017844 | -                | intracellular, zinc ion binding                                                                                                                                                                                                                                                                                                                                        |
| groupIV  | 9326969  | 9401969  | No | psR | ENSGACG00000017848 | -                | -                                                                                                                                                                                                                                                                                                                                                                      |
| groupIV  | 9326969  | 9401969  | No | psR | ENSGACG00000017846 | CTNND1 (2 of 2)  | binding, protein binding                                                                                                                                                                                                                                                                                                                                               |
| groupIV  | 10319718 | 10351718 | No | bg  | ENSGACG00000017928 | ETF1             | -                                                                                                                                                                                                                                                                                                                                                                      |
| groupIV  | 11551794 | 11606794 | No | n   | -                  | -                | -                                                                                                                                                                                                                                                                                                                                                                      |

|         |          |          |    |     |                    |                  |                                                                                                                                                                                                                                                                                                                                                                                                                                                                                                                                                                                                                        |
|---------|----------|----------|----|-----|--------------------|------------------|------------------------------------------------------------------------------------------------------------------------------------------------------------------------------------------------------------------------------------------------------------------------------------------------------------------------------------------------------------------------------------------------------------------------------------------------------------------------------------------------------------------------------------------------------------------------------------------------------------------------|
| groupIV | 11883990 | 11906990 | No | bg  | ENSGACG00000018209 | NR3C1 (1 of 2)   | regulation of transcription, DNA-dependent, steroid hormone mediated signaling pathway, glucocorticoid receptor signaling pathway, glucocorticoid mediated signaling pathway, response to dexamethasone stimulus, response to cortisol stimulus, response to glucocorticoid stimulus, calcium ion import, embryo development, positive regulation of transcription, DNA-dependent, nucleus, cytoplasm, sequence-specific DNA binding transcription factor activity, steroid hormone receptor activity, DNA binding, zinc ion binding, steroid binding, sequence-specific DNA binding, glucocorticoid receptor activity |
| groupIV | 11883990 | 11906990 | No | bg  | ENSGACG00000018211 | KCTD16 (2 of 2)  | potassium ion transport, membrane, voltage-gated potassium channel complex, protein binding, voltage-gated potassium channel activity                                                                                                                                                                                                                                                                                                                                                                                                                                                                                  |
| groupIV | 11951841 | 12001583 | No | bg  | ENSGACG00000018221 | FGF16            | pectoral fin morphogenesis, cell proliferation, growth factor activity                                                                                                                                                                                                                                                                                                                                                                                                                                                                                                                                                 |
| groupIV | 11951841 | 12001583 | No | bg  | ENSGACG00000018218 | ATRXL            | nucleic acid binding, DNA binding, zinc ion binding, ATP binding, protein binding, helicase activity                                                                                                                                                                                                                                                                                                                                                                                                                                                                                                                   |
| groupIV | 12036368 | 12058368 | No | bg  | -                  | -                | -                                                                                                                                                                                                                                                                                                                                                                                                                                                                                                                                                                                                                      |
| groupIV | 13316184 | 13329223 | No | psL | -                  | -                | -                                                                                                                                                                                                                                                                                                                                                                                                                                                                                                                                                                                                                      |
| groupIV | 13502481 | 13573820 | No | psR | ENSGACG00000018406 | LRRTM2           | protein binding                                                                                                                                                                                                                                                                                                                                                                                                                                                                                                                                                                                                        |
| groupIV | 13502481 | 13573820 | No | psR | ENSGACG00000018391 | CTNNA1           | cell adhesion, actin cytoskeleton, structural molecule activity                                                                                                                                                                                                                                                                                                                                                                                                                                                                                                                                                        |
| groupIV | 13807552 | 13874552 | No | psR | ENSGACG00000018407 | SNCB             | dopaminergic neuron differentiation, larval locomotory behavior                                                                                                                                                                                                                                                                                                                                                                                                                                                                                                                                                        |
| groupIV | 13807552 | 13874552 | No | psR | ENSGACG00000018408 | CDHR2            | cell adhesion, homophilic cell adhesion, membrane, plasma membrane, calcium ion binding                                                                                                                                                                                                                                                                                                                                                                                                                                                                                                                                |
| groupIV | 13807552 | 13874552 | No | psR | ENSGACG00000018413 | RNF44            | zinc ion binding, protein binding                                                                                                                                                                                                                                                                                                                                                                                                                                                                                                                                                                                      |
| groupIV | 13807552 | 13874552 | No | psR | ENSGACG00000018417 | FAF2             | -                                                                                                                                                                                                                                                                                                                                                                                                                                                                                                                                                                                                                      |
| groupIV | 13936707 | 13961395 | No | n   | -                  | -                | -                                                                                                                                                                                                                                                                                                                                                                                                                                                                                                                                                                                                                      |
| groupIV | 17316716 | 17408198 | No | psL | -                  | -                | -                                                                                                                                                                                                                                                                                                                                                                                                                                                                                                                                                                                                                      |
| groupIV | 17509167 | 17614167 | No | psR | -                  | -                | -                                                                                                                                                                                                                                                                                                                                                                                                                                                                                                                                                                                                                      |
| groupIV | 23176499 | 23230500 | No | psL | ENSGACG00000019249 | AEBP2 (2 of 2)   | intracellular, zinc ion binding                                                                                                                                                                                                                                                                                                                                                                                                                                                                                                                                                                                        |
| groupIV | 23176499 | 23230500 | No | psL | ENSGACG00000019242 | COG5             | -                                                                                                                                                                                                                                                                                                                                                                                                                                                                                                                                                                                                                      |
| groupIV | 23176499 | 23230500 | No | psL | ENSGACG00000019248 | NDUFA5           | respiratory electron transport chain, mitochondrial inner membrane, oxidoreductase activity, acting on NADH or NADPH                                                                                                                                                                                                                                                                                                                                                                                                                                                                                                   |
| groupIV | 23176499 | 23230500 | No | psL | ENSGACG00000019253 | PLEKHA5 (2 of 2) | protein binding                                                                                                                                                                                                                                                                                                                                                                                                                                                                                                                                                                                                        |
| groupIV | 25014649 | 25038649 | No | n   | -                  | -                | -                                                                                                                                                                                                                                                                                                                                                                                                                                                                                                                                                                                                                      |
| groupIV | 27689358 | 27743358 | No | psR | -                  | -                | -                                                                                                                                                                                                                                                                                                                                                                                                                                                                                                                                                                                                                      |
| groupIV | 27764840 | 27803117 | No | n   | ENSGACG00000019633 | MYOT             | protein binding                                                                                                                                                                                                                                                                                                                                                                                                                                                                                                                                                                                                        |
| groupIV | 27764840 | 27803117 | No | n   | ENSGACG00000019640 | -                | protein phosphorylation, ATP binding, protein kinase activity, transferase activity, transferring phosphorus-containing groups, protein serine/threonine kinase activity, small GTPase regulator activity                                                                                                                                                                                                                                                                                                                                                                                                              |
| groupIX | 3275713  | 3309713  | No | psR | ENSGACG00000016386 | VEGFC            | sprouting angiogenesis, lymphangiogenesis, angiogenesis, vascular endothelial growth factor receptor signaling pathway, endoderm development, membrane, growth factor activity, vascular endothelial growth factor receptor binding                                                                                                                                                                                                                                                                                                                                                                                    |
| groupIX | 3513100  | 3527109  | No | bg  | -                  | -                | -                                                                                                                                                                                                                                                                                                                                                                                                                                                                                                                                                                                                                      |
| groupIX | 3529157  | 3584157  | No | bg  | -                  | -                | -                                                                                                                                                                                                                                                                                                                                                                                                                                                                                                                                                                                                                      |
| groupIX | 3816789  | 3831789  | No | n   | ENSGACG00000016390 | ODZ3 (1 of 2)    | signal transduction, integral to membrane, calcium ion binding, catalytic activity, protein binding                                                                                                                                                                                                                                                                                                                                                                                                                                                                                                                    |
| groupIX | 8103529  | 8125354  | No | bg  | ENSGACG00000017501 | AIMP1 (1 of 2)   | tRNA binding                                                                                                                                                                                                                                                                                                                                                                                                                                                                                                                                                                                                           |
| groupIX | 8103529  | 8125354  | No | bg  | ENSGACG00000017502 | TBCK             | protein phosphorylation, regulation of Rab GTPase activity, intracellular, ATP binding, protein kinase activity, transferase activity, transferring phosphorus-containing groups, Rab GTPase activator activity, protein serine/threonine kinase activity                                                                                                                                                                                                                                                                                                                                                              |
| groupIX | 8988452  | 9028452  | No | psL | -                  | -                | -                                                                                                                                                                                                                                                                                                                                                                                                                                                                                                                                                                                                                      |
| groupIX | 9846445  | 9876486  | No | psL | ENSGACG00000018071 | GRIA2 (2 of 2)   | transport, membrane, outer membrane-bounded periplasmic space, transporter activity, ionotropic glutamate receptor activity, extracellular-glutamate-gated ion channel activity                                                                                                                                                                                                                                                                                                                                                                                                                                        |
| groupIX | 11604130 | 11937922 | No | psL | ENSGACG00000018410 | PCDH18 (1 of 2)  | cell adhesion, homophilic cell adhesion, epiboly involved in gastrulation with mouth forming second, calcium-dependent cell-cell adhesion, cell migration involved in gastrulation, membrane, plasma membrane, calcium ion binding                                                                                                                                                                                                                                                                                                                                                                                     |
| groupIX | 11604130 | 11937922 | No | psL | ENSGACG00000018409 | PCDH10 (2 of 2)  | cell adhesion, homophilic cell adhesion, membrane, plasma membrane, calcium ion binding                                                                                                                                                                                                                                                                                                                                                                                                                                                                                                                                |
| groupIX | 12040164 | 12118165 | No | psL | -                  | -                | -                                                                                                                                                                                                                                                                                                                                                                                                                                                                                                                                                                                                                      |
| groupIX | 12198878 | 12253446 | No | psL | ENSGACG00000018448 | -                | -                                                                                                                                                                                                                                                                                                                                                                                                                                                                                                                                                                                                                      |
| groupIX | 12198878 | 12253446 | No | psL | ENSGACG00000018451 | UNC93B1          | -                                                                                                                                                                                                                                                                                                                                                                                                                                                                                                                                                                                                                      |
| groupIX | 12198878 | 12253446 | No | psL | ENSGACG00000018452 | TIMM10           | protein targeting to mitochondrion, protein import into mitochondrial inner membrane, mitochondrial intermembrane space protein transporter complex                                                                                                                                                                                                                                                                                                                                                                                                                                                                    |

|          |          |          |    |     |                    |                  |                                                                                                                                                                                                                                                                                                                           |
|----------|----------|----------|----|-----|--------------------|------------------|---------------------------------------------------------------------------------------------------------------------------------------------------------------------------------------------------------------------------------------------------------------------------------------------------------------------------|
| groupIX  | 12198878 | 12253446 | No | psL | ENSGACG00000018434 | -                | protein binding                                                                                                                                                                                                                                                                                                           |
| groupIX  | 12198878 | 12253446 | No | psL | ENSGACG00000018436 | -                | -                                                                                                                                                                                                                                                                                                                         |
| groupIX  | 12281856 | 12312856 | No | psL | ENSGACG00000018459 | SLC43A3 (1 of 2) | G-protein coupled receptor signaling pathway, transmembrane transport, integral to membrane                                                                                                                                                                                                                               |
| groupIX  | 12281856 | 12312856 | No | psL | ENSGACG00000018463 | -                | protein dimerization activity                                                                                                                                                                                                                                                                                             |
| groupIX  | 12281856 | 12312856 | No | psL | ENSGACG00000018465 | CCRN4L (2 of 2)  | -                                                                                                                                                                                                                                                                                                                         |
| groupIX  | 12281856 | 12312856 | No | psL | ENSGACG00000018469 | ELF2 (1 of 2)    | regulation of transcription, DNA-dependent, sequence-specific DNA binding transcription factor activity, sequence-specific DNA binding                                                                                                                                                                                    |
| groupIX  | 12953788 | 13006788 | No | bg  | ENSGACG00000018535 | PSMD12           | protein binding                                                                                                                                                                                                                                                                                                           |
| groupIX  | 12953788 | 13006788 | No | bg  | ENSGACG00000018530 | -                | nucleic acid binding, zinc ion binding                                                                                                                                                                                                                                                                                    |
| groupIX  | 13878722 | 13889722 | No | psL | -                  | -                | -                                                                                                                                                                                                                                                                                                                         |
| groupIX  | 13908576 | 13937576 | No | psR | ENSGACG00000018691 | PDCD4            | -                                                                                                                                                                                                                                                                                                                         |
| groupIX  | 13908576 | 13937576 | No | psR | ENSGACG00000018706 | RBM20 (2 of 2)   | -                                                                                                                                                                                                                                                                                                                         |
| groupIX  | 13908576 | 13937576 | No | psR | ENSGACG00000018688 | SHOC2            | protein binding                                                                                                                                                                                                                                                                                                           |
| groupIX  | 17192703 | 17229094 | No | psR | -                  | -                | -                                                                                                                                                                                                                                                                                                                         |
| groupIX  | 17347136 | 17385168 | No | n   | ENSGACG00000019412 | ADAP2 (2 of 2)   | regulation of ARF GTPase activity, zinc ion binding, protein binding, ARF GTPase activator activity                                                                                                                                                                                                                       |
| groupIX  | 17347136 | 17385168 | No | n   | ENSGACG00000019419 | TEFM             | -                                                                                                                                                                                                                                                                                                                         |
| groupIX  | 17347136 | 17385168 | No | n   | ENSGACG00000019420 | -                | -                                                                                                                                                                                                                                                                                                                         |
| groupIX  | 17347136 | 17385168 | No | n   | ENSGACG00000019410 | RHOT1 (2 of 2)   | small GTPase mediated signal transduction, protein transport, intracellular, calcium ion binding, GTP binding                                                                                                                                                                                                             |
| groupV   | 4797325  | 4810325  | No | n   | ENSGACG00000004164 | KCTD2            | potassium ion transport, membrane, voltage-gated potassium channel complex, protein binding, voltage-gated potassium channel activity                                                                                                                                                                                     |
| groupV   | 4797325  | 4810325  | No | n   | ENSGACG00000004150 | SLC16A5 (2 of 2) | transmembrane transport, integral to membrane                                                                                                                                                                                                                                                                             |
| groupV   | 7309790  | 7346790  | No | psL | -                  | -                | -                                                                                                                                                                                                                                                                                                                         |
| groupV   | 9469391  | 9492778  | No | psR | ENSGACG00000007239 | PAQR4 (2 of 2)   | integral to membrane                                                                                                                                                                                                                                                                                                      |
| groupV   | 9469391  | 9492778  | No | psR | ENSGACG00000007245 | PELO             | -                                                                                                                                                                                                                                                                                                                         |
| groupV   | 9469391  | 9492778  | No | psR | ENSGACG00000007364 | -                | hydrolase activity                                                                                                                                                                                                                                                                                                        |
| groupV   | 9469391  | 9492778  | No | psR | ENSGACG00000007397 | ATP2A1 (1 of 2)  | calcium ion transport, metabolic process, ATP biosynthetic process, cation transport, membrane, integral to membrane, ATP binding, metal ion binding, catalytic activity, nucleotide binding, ATPase activity, coupled to transmembrane movement of ions, phosphorylative mechanism, calcium-transporting ATPase activity |
| groupVI  | 10549302 | 10562302 | No | psL | ENSGACG00000009043 | PCSK2            | proteolysis, serine-type endopeptidase activity                                                                                                                                                                                                                                                                           |
| groupVI  | 10549302 | 10562302 | No | psL | ENSGACG00000009101 | BFSP1            | -                                                                                                                                                                                                                                                                                                                         |
| groupVI  | 13120817 | 13130817 | No | bg  | -                  | -                | -                                                                                                                                                                                                                                                                                                                         |
| groupVII | 6600254  | 6621254  | No | psR | ENSGACG00000019575 | LGI2 (1 of 2)    | carbohydrate metabolic process, catalytic activity, protein binding, carbohydrate binding                                                                                                                                                                                                                                 |
| groupVII | 6600254  | 6621254  | No | psR | ENSGACG00000019587 | SEPSECS          | transferase activity                                                                                                                                                                                                                                                                                                      |
| groupVII | 12535703 | 12560228 | No | psL | ENSGACG00000020160 | SKA2L            | -                                                                                                                                                                                                                                                                                                                         |
| groupVII | 12535703 | 12560228 | No | psL | ENSGACG00000021295 | -                | -                                                                                                                                                                                                                                                                                                                         |
| groupVII | 12535703 | 12560228 | No | psL | ENSGACG00000021437 | -                | -                                                                                                                                                                                                                                                                                                                         |
| groupVII | 12535703 | 12560228 | No | psL | ENSGACG00000020161 | TIPRL            | -                                                                                                                                                                                                                                                                                                                         |
| groupVII | 13006322 | 13023322 | No | n   | ENSGACG00000020185 | IGSF9B (1 of 4)  | protein binding, protein binding                                                                                                                                                                                                                                                                                          |
| groupVII | 13188990 | 13212990 | No | psL | ENSGACG00000020189 | IGSF5 (1 of 2)   | protein binding                                                                                                                                                                                                                                                                                                           |
| groupVII | 13269871 | 13280871 | No | psL | ENSGACG00000020192 | -                | carbohydrate metabolic process, beta-galactosidase complex, hydrolase activity, hydrolyzing O-glycosyl compounds, beta-galactosidase activity                                                                                                                                                                             |
| groupVII | 13269871 | 13280871 | No | psL | ENSGACG00000020193 | STT3A            | protein glycosylation, membrane, oligosaccharyl transferase activity, protein glycosylation, membrane, oligosaccharyl transferase activity                                                                                                                                                                                |
| groupVII | 15782798 | 15839798 | No | psR | ENSGACG00000020293 | GABRQ            | transport, ion transport, membrane, integral to membrane, postsynaptic membrane, extracellular ligand-gated ion channel activity                                                                                                                                                                                          |
| groupVII | 15782798 | 15839798 | No | psR | ENSGACG00000020294 | VSIG1            | protein binding                                                                                                                                                                                                                                                                                                           |
| groupVII | 15782798 | 15839798 | No | psR | ENSGACG00000020296 | MPP1             | protein binding                                                                                                                                                                                                                                                                                                           |
| groupVII | 15782798 | 15839798 | No | psR | ENSGACG00000020297 | VAMP2            | vesicle-mediated transport, integral to membrane, vesicle-mediated transport, integral to membrane, cleavage furrow, vesicle, plasma membrane                                                                                                                                                                             |



|          |          |          |    |     |                    |                   |                                                                                                                                                                                                                                                                                                                                                                                                               |
|----------|----------|----------|----|-----|--------------------|-------------------|---------------------------------------------------------------------------------------------------------------------------------------------------------------------------------------------------------------------------------------------------------------------------------------------------------------------------------------------------------------------------------------------------------------|
| groupVII | 15782798 | 15839798 | No | psR | ENSGACG00000020295 | TMLHE             | oxidation-reduction process, carnitine biosynthetic process, iron ion binding, oxidoreductase activity, L-ascorbic acid binding, trimethyllysine dioxygenase activity                                                                                                                                                                                                                                         |
| groupVII | 16470769 | 16529479 | No | n   | ENSGACG00000020311 | -                 | protein binding, protein binding                                                                                                                                                                                                                                                                                                                                                                              |
| groupVII | 16470769 | 16529479 | No | n   | ENSGACG00000020312 | ROBO2 (2 of 2)    | protein binding, protein binding                                                                                                                                                                                                                                                                                                                                                                              |
| groupVII | 16575725 | 16593763 | No | -   | -                  | -                 | -                                                                                                                                                                                                                                                                                                                                                                                                             |
| groupVII | 16647076 | 16701076 | No | psL | -                  | -                 | -                                                                                                                                                                                                                                                                                                                                                                                                             |
| groupVII | 16888482 | 16932482 | No | bg  | ENSGACG00000020319 | NPM1              | nucleic acid binding, hemopoiesis, nucleolus, nucleic acid binding                                                                                                                                                                                                                                                                                                                                            |
| groupVII | 16888482 | 16932482 | No | bg  | ENSGACG00000020320 | CLDN7 (1 of 2)    | membrane, tight junction, structural molecule activity                                                                                                                                                                                                                                                                                                                                                        |
| groupVII | 16888482 | 16932482 | No | bg  | ENSGACG00000020318 | KCNIP1 (2 of 2)   | calcium ion binding                                                                                                                                                                                                                                                                                                                                                                                           |
| groupVII | 16888482 | 16932482 | No | bg  | ENSGACG00000020321 | FGF11 (2 of 2)    | growth factor activity                                                                                                                                                                                                                                                                                                                                                                                        |
| groupVII | 16939303 | 16950303 | No | psR | -                  | -                 | -                                                                                                                                                                                                                                                                                                                                                                                                             |
| groupVII | 17868332 | 17907332 | No | psR | ENSGACG00000020391 | GLTPD2 (1 of 2)   | -                                                                                                                                                                                                                                                                                                                                                                                                             |
| groupVII | 17868332 | 17907332 | No | psR | ENSGACG00000020390 | ATP1B2 (1 of 2)   | potassium ion transport, sodium ion transport, ATP biosynthetic process, membrane, sodium:potassium-exchanging ATPase activity, potassium ion transport, sodium ion transport, ATP biosynthetic process, inner ear morphogenesis, otolith development, startle response, posterior lateral line neuromast hair cell differentiation, heart development, membrane, sodium:potassium-exchanging ATPase activity |
| groupVII | 17868332 | 17907332 | No | psR | ENSGACG00000020392 | CHRNE             | transport, ion transport, membrane, integral to membrane, postsynaptic membrane, extracellular ligand-gated ion channel activity, transport, ion transport, membrane, integral to membrane, postsynaptic membrane, extracellular ligand-gated ion channel activity                                                                                                                                            |
| groupVII | 17868332 | 17907332 | No | psR | ENSGACG00000020393 | PLD2              | cell communication, metabolic process, phosphatidylinositol binding, catalytic activity, protein binding                                                                                                                                                                                                                                                                                                      |
| groupVII | 18008902 | 18113902 | No | psR | ENSGACG00000020403 | -                 | -                                                                                                                                                                                                                                                                                                                                                                                                             |
| groupVII | 18008902 | 18113902 | No | psR | ENSGACG00000020405 | DPF2 (1 of 2)     | intracellular, zinc ion binding, protein binding                                                                                                                                                                                                                                                                                                                                                              |
| groupVII | 18008902 | 18113902 | No | psR | ENSGACG00000020407 | SIPA1             | regulation of small GTPase mediated signal transduction, intracellular, protein binding, GTPase activator activity                                                                                                                                                                                                                                                                                            |
| groupVII | 18008902 | 18113902 | No | psR | ENSGACG00000020404 | SPTBN2            | actin binding, protein binding                                                                                                                                                                                                                                                                                                                                                                                |
| groupVII | 18008902 | 18113902 | No | psR | ENSGACG00000020406 | -                 | transmembrane transport, integral to membrane                                                                                                                                                                                                                                                                                                                                                                 |
| groupVII | 18128628 | 18159628 | No | psR | ENSGACG00000020410 | -                 | cobalamin transport, cobalamin binding                                                                                                                                                                                                                                                                                                                                                                        |
| groupVII | 18128628 | 18159628 | No | psR | ENSGACG00000020411 | HINFP             | transcription, DNA-dependent, intracellular, nucleic acid binding, zinc ion binding, transcription, DNA-dependent, intracellular, nucleic acid binding, zinc ion binding                                                                                                                                                                                                                                      |
| groupVII | 18128628 | 18159628 | No | psR | ENSGACG00000020409 | ABCG4 (2 of 2)    | membrane, ATP binding, nucleotide binding, ATPase activity, nucleoside-triphosphatase activity                                                                                                                                                                                                                                                                                                                |
| groupVII | 18128628 | 18159628 | No | psR | ENSGACG00000020412 | DPAGT1            | integral to membrane, phospho-N-acetylmuramoyl-pentapeptide-transferase activity                                                                                                                                                                                                                                                                                                                              |
| groupVII | 18128628 | 18159628 | No | psR | ENSGACG00000020413 | C2CD2L            | -                                                                                                                                                                                                                                                                                                                                                                                                             |
| groupVII | 18186355 | 18222355 | No | n   | ENSGACG00000020416 | ATF5              | regulation of transcription, DNA-dependent, sequence-specific DNA binding transcription factor activity, DNA binding, sequence-specific DNA binding, protein dimerization activity                                                                                                                                                                                                                            |
| groupVII | 18186355 | 18222355 | No | n   | ENSGACG00000020417 | STK36             | protein phosphorylation, cilium axoneme assembly, determination of left/right symmetry, dorsal/ventral pattern formation, smoothened signaling pathway, ATP binding, protein kinase activity, transferase activity, transferring phosphorus-containing groups, protein serine/threonine kinase activity                                                                                                       |
| groupVII | 18186355 | 18222355 | No | n   | ENSGACG00000020418 | ADAMTS15 (2 of 2) | proteolysis, extracellular matrix, zinc ion binding, metalloendopeptidase activity                                                                                                                                                                                                                                                                                                                            |
| groupVII | 18186355 | 18222355 | No | n   | ENSGACG00000020415 | -                 | protein binding                                                                                                                                                                                                                                                                                                                                                                                               |
| groupVII | 18302840 | 18345846 | No | psR | ENSGACG00000022227 | -                 | -                                                                                                                                                                                                                                                                                                                                                                                                             |
| groupVII | 18302840 | 18345846 | No | psR | ENSGACG00000021426 | -                 | -                                                                                                                                                                                                                                                                                                                                                                                                             |
| groupVII | 18302840 | 18345846 | No | psR | ENSGACG00000022268 | -                 | -                                                                                                                                                                                                                                                                                                                                                                                                             |
| groupVII | 18450084 | 18473084 | No | psL | ENSGACG00000020430 | CPEB4 (1 of 2)    | nucleic acid binding, nucleic acid binding                                                                                                                                                                                                                                                                                                                                                                    |
| groupVII | 19232382 | 19266382 | No | -   | ENSGACG00000020492 | MRPS17            | translation, intracellular, ribosome, structural constituent of ribosome                                                                                                                                                                                                                                                                                                                                      |
| groupVII | 19232382 | 19266382 | No | -   | ENSGACG00000020493 | GBAS (2 of 2)     | metabolic process, transferase activity, folic acid binding                                                                                                                                                                                                                                                                                                                                                   |
| groupVII | 19232382 | 19266382 | No | -   | ENSGACG00000020494 | CCT6A             | protein folding, cellular protein metabolic process, ATP binding, unfolded protein binding, protein folding, cellular protein metabolic process, ATP binding, unfolded protein binding                                                                                                                                                                                                                        |
| groupVII | 19232382 | 19266382 | No | -   | ENSGACG00000022599 | -                 | -                                                                                                                                                                                                                                                                                                                                                                                                             |
| groupVII | 19232382 | 19266382 | No | -   | ENSGACG00000022586 | -                 | -                                                                                                                                                                                                                                                                                                                                                                                                             |
| groupVII | 19232382 | 19266382 | No | -   | ENSGACG00000022642 | -                 | -                                                                                                                                                                                                                                                                                                                                                                                                             |

|           |          |          |    |     |                    |                   |                                                                                                                                                                                                                                                                                                                                                                                                                                                                                   |
|-----------|----------|----------|----|-----|--------------------|-------------------|-----------------------------------------------------------------------------------------------------------------------------------------------------------------------------------------------------------------------------------------------------------------------------------------------------------------------------------------------------------------------------------------------------------------------------------------------------------------------------------|
| groupVII  | 19232382 | 19266382 | No | -   | ENSGACG00000020495 | SUMF2             | binding                                                                                                                                                                                                                                                                                                                                                                                                                                                                           |
| groupVII  | 19232382 | 19266382 | No | -   | ENSGACG00000020496 | -                 | -                                                                                                                                                                                                                                                                                                                                                                                                                                                                                 |
| groupVII  | 20904868 | 20939868 | No | psR | ENSGACG00000020596 | PROSER1 (2 of 2)  | -                                                                                                                                                                                                                                                                                                                                                                                                                                                                                 |
| groupVII  | 20904868 | 20939868 | No | psR | ENSGACG00000020597 | PROSER1 (1 of 2)  | -                                                                                                                                                                                                                                                                                                                                                                                                                                                                                 |
| groupVII  | 20904868 | 20939868 | No | psR | ENSGACG00000020598 | STOML3 (1 of 2)   | -                                                                                                                                                                                                                                                                                                                                                                                                                                                                                 |
| groupVII  | 20904868 | 20939868 | No | psR | ENSGACG00000020595 | VPS36             | -                                                                                                                                                                                                                                                                                                                                                                                                                                                                                 |
| groupVII  | 20904868 | 20939868 | No | psR | ENSGACG00000020599 | MTUS2 (2 of 2)    | -                                                                                                                                                                                                                                                                                                                                                                                                                                                                                 |
| groupVII  | 21849090 | 21881090 | No | psR | ENSGACG00000020652 | -                 | carbohydrate metabolic process, pyridoxal phosphate binding, phosphorylase activity                                                                                                                                                                                                                                                                                                                                                                                               |
| groupVII  | 21849090 | 21881090 | No | psR | ENSGACG00000020653 | -                 | transmembrane transport, integral to membrane, transmembrane transporter activity, transmembrane transport, integral to membrane, transmembrane transporter activity                                                                                                                                                                                                                                                                                                              |
| groupVII  | 22034155 | 22051155 | No | bg  | ENSGACG00000020659 | DNAJC18           | methylation, nucleic acid binding, methyltransferase activity, heat shock protein binding                                                                                                                                                                                                                                                                                                                                                                                         |
| groupVII  | 22034155 | 22051155 | No | bg  | ENSGACG00000020658 | -                 | hydrolase activity, hydrolase activity                                                                                                                                                                                                                                                                                                                                                                                                                                            |
| groupVII  | 22057521 | 22108982 | No | psR | ENSGACG00000020661 | TMEM45B           | -                                                                                                                                                                                                                                                                                                                                                                                                                                                                                 |
| groupVII  | 22057521 | 22108982 | No | psR | ENSGACG00000020660 | BRD8 (1 of 2)     | protein binding                                                                                                                                                                                                                                                                                                                                                                                                                                                                   |
| groupVII  | 22057521 | 22108982 | No | psR | ENSGACG00000020662 | NFRKB             | -                                                                                                                                                                                                                                                                                                                                                                                                                                                                                 |
| groupVII  | 22057521 | 22108982 | No | psR | ENSGACG00000020663 | RYR1 (2 of 2)     | oxidation-reduction process, ion transport, transmembrane transport, calcium ion transmembrane transport, cellular calcium ion homeostasis, membrane, integral to membrane, protein binding, ion channel activity, calcium channel activity, ryanodine-sensitive calcium-release channel activity, oxidoreductase activity, acting on paired donors, with incorporation or reduction of molecular oxygen, reduced pteridine as one donor, and incorporation of one atom of oxygen |
| groupVII  | 24162977 | 24288546 | No | psR | ENSGACG00000020764 | ALKBH4            | -                                                                                                                                                                                                                                                                                                                                                                                                                                                                                 |
| groupVII  | 24162977 | 24288546 | No | psR | ENSGACG00000020765 | LRWD1             | protein binding                                                                                                                                                                                                                                                                                                                                                                                                                                                                   |
| groupVII  | 24162977 | 24288546 | No | psR | ENSGACG00000020766 | -                 | signal transduction, peptidyl-histidine phosphorylation, ATP binding, two-component sensor activity, protein histidine kinase activity, signal transduction, peptidyl-histidine phosphorylation, ATP binding, two-component sensor activity, protein histidine kinase activity                                                                                                                                                                                                    |
| groupVII  | 24162977 | 24288546 | No | psR | ENSGACG00000020767 | ORAI2             | -                                                                                                                                                                                                                                                                                                                                                                                                                                                                                 |
| groupVII  | 24162977 | 24288546 | No | psR | ENSGACG00000020770 | HTR3A             | transport, ion transport, membrane, integral to membrane, postsynaptic membrane, extracellular ligand-gated ion channel activity, transport, ion transport, membrane, integral to membrane, postsynaptic membrane, extracellular ligand-gated ion channel activity, transport, ion transport, membrane, integral to membrane, postsynaptic membrane, extracellular ligand-gated ion channel activity                                                                              |
| groupVII  | 24162977 | 24288546 | No | psR | ENSGACG00000020762 | MCAM (1 of 2)     | protein binding                                                                                                                                                                                                                                                                                                                                                                                                                                                                   |
| groupVII  | 24162977 | 24288546 | No | psR | ENSGACG00000020763 | CBL (2 of 2)      | cell surface receptor signaling pathway, nucleus, signal transducer activity, zinc ion binding, protein binding                                                                                                                                                                                                                                                                                                                                                                   |
| groupVII  | 24162977 | 24288546 | No | psR | ENSGACG00000020768 | USP28             | ubiquitin-dependent protein catabolic process, ubiquitin thiolesterase activity                                                                                                                                                                                                                                                                                                                                                                                                   |
| groupVII  | 24162977 | 24288546 | No | psR | ENSGACG00000020769 | HTR3B             | transport, ion transport, membrane, integral to membrane, postsynaptic membrane, extracellular ligand-gated ion channel activity                                                                                                                                                                                                                                                                                                                                                  |
| groupVII  | 24162977 | 24288546 | No | psR | ENSGACG00000020771 | ZBTB16 (1 of 2)   | intracellular, zinc ion binding, protein binding                                                                                                                                                                                                                                                                                                                                                                                                                                  |
| groupVIII | 3592495  | 3634762  | No | psR | ENSGACG00000005009 | FOXQ1             | regulation of transcription, DNA-dependent, sequence-specific DNA binding transcription factor activity, sequence-specific DNA binding                                                                                                                                                                                                                                                                                                                                            |
| groupVIII | 3592495  | 3634762  | No | psR | ENSGACG00000005011 | -                 | regulation of transcription, DNA-dependent, sequence-specific DNA binding transcription factor activity, sequence-specific DNA binding                                                                                                                                                                                                                                                                                                                                            |
| groupVIII | 3592495  | 3634762  | No | psR | ENSGACG00000005016 | -                 | regulation of transcription, DNA-dependent, sequence-specific DNA binding transcription factor activity, sequence-specific DNA binding                                                                                                                                                                                                                                                                                                                                            |
| groupVIII | 3592495  | 3634762  | No | psR | ENSGACG00000005020 | GMDS              | cellular metabolic process, GDP-mannose metabolic process, retina layer formation, dorsal motor nucleus of vagus nerve development, vagus nerve development, Notch signaling pathway, intracellular, oxidoreductase activity, catalytic activity, coenzyme binding, GDP-mannose 4, 6-dehydratase activity, fucosyltransferase activity                                                                                                                                            |
| groupVIII | 5728988  | 5755416  | No | psR | -                  | -                 | -                                                                                                                                                                                                                                                                                                                                                                                                                                                                                 |
| groupVIII | 12106496 | 12176892 | No | bg  | -                  | -                 | -                                                                                                                                                                                                                                                                                                                                                                                                                                                                                 |
| groupVIII | 12334932 | 12351145 | No | n   | -                  | -                 | -                                                                                                                                                                                                                                                                                                                                                                                                                                                                                 |
| groupX    | 4988182  | 5006182  | No | psR | -                  | -                 | -                                                                                                                                                                                                                                                                                                                                                                                                                                                                                 |
| groupX    | 6212410  | 6240410  | No | psR | ENSGACG00000004037 | GPR20 (2 of 2)    | G-protein coupled receptor signaling pathway, integral to membrane                                                                                                                                                                                                                                                                                                                                                                                                                |
| groupX    | 6212410  | 6240410  | No | psR | ENSGACG00000004039 | C16orf80 (1 of 3) | -                                                                                                                                                                                                                                                                                                                                                                                                                                                                                 |
| groupX    | 6212410  | 6240410  | No | psR | ENSGACG00000004032 | SLC45A4 (1 of 2)  | transmembrane transport, integral to membrane                                                                                                                                                                                                                                                                                                                                                                                                                                     |

|          |          |          |    |     |                     |                   |                                                                                                                                                                                                                                                                                                                   |
|----------|----------|----------|----|-----|---------------------|-------------------|-------------------------------------------------------------------------------------------------------------------------------------------------------------------------------------------------------------------------------------------------------------------------------------------------------------------|
| groupX   | 6278406  | 6351671  | No | psL | ENSGACG00000004072  | -                 | intracellular, zinc ion binding                                                                                                                                                                                                                                                                                   |
| groupX   | 6278406  | 6351671  | No | psL | ENSGACG00000004076  | SLC39A4           | transmembrane transport, metal ion transport, membrane, metal ion transmembrane transporter activity                                                                                                                                                                                                              |
| groupX   | 7547359  | 7575359  | No | n   | ENSGACG00000005059  | RUNX1T1           | regulation of transcription, DNA-dependent, sequence-specific DNA binding transcription factor activity, zinc ion binding                                                                                                                                                                                         |
| groupX   | 7593285  | 7655931  | No | psR | -                   | -                 | -                                                                                                                                                                                                                                                                                                                 |
| groupX   | 7799350  | 7817350  | No | psR | ENSGACG00000005164  | ATP6V1C1 (1 of 2) | ATP hydrolysis coupled proton transport, proton-transporting V-type ATPase, V1 domain, hydrolase activity, acting on acid anhydrides, catalyzing transmembrane movement of substances                                                                                                                             |
| groupX   | 7799350  | 7817350  | No | psR | ENSGACG00000005147  | SPIRE1 (2 of 2)   | protein binding                                                                                                                                                                                                                                                                                                   |
| groupX   | 7838462  | 7864487  | No | psL | ENSGACG00000005193  | ADNP2             | regulation of transcription, DNA-dependent, intracellular, sequence-specific DNA binding transcription factor activity, zinc ion binding, sequence-specific DNA binding, protein binding                                                                                                                          |
| groupX   | 7838462  | 7864487  | No | psL | ENSGACG00000005197  | GGCT              | -                                                                                                                                                                                                                                                                                                                 |
| groupX   | 7838462  | 7864487  | No | psL | ENSGACG00000005220  | ANKIB1 (2 of 2)   | zinc ion binding, protein binding                                                                                                                                                                                                                                                                                 |
| groupX   | 7838462  | 7864487  | No | psL | ENSGACG00000005201  | SNRPD1            | heart development                                                                                                                                                                                                                                                                                                 |
| groupX   | 8479060  | 8493060  | No | psR | ENSGACG00000005895  | GABBR2            | G-protein coupled receptor signaling pathway, integral to membrane, G-protein coupled receptor activity                                                                                                                                                                                                           |
| groupX   | 8809293  | 8851859  | No | psR | ENSGACG00000006123  | -                 | binding                                                                                                                                                                                                                                                                                                           |
| groupX   | 8809293  | 8851859  | No | psR | ENSGACG00000006108  | RAPGEF5 (2 of 2)  | intracellular signal transduction, small GTPase mediated signal transduction, regulation of small GTPase mediated signal transduction, intracellular, guanyl-nucleotide exchange factor activity                                                                                                                  |
| groupX   | 9306768  | 9337768  | No | psR | ENSGACG00000006652  | -                 | protein binding                                                                                                                                                                                                                                                                                                   |
| groupXI  | 2178216  | 2205216  | No | psL | ENSGACG00000005784  | AOC2              | oxidation-reduction process, amine metabolic process, copper ion binding, primary amine oxidase activity, quinone binding                                                                                                                                                                                         |
| groupXI  | 2178216  | 2205216  | No | psL | ENSGACG00000005803  | -                 | -                                                                                                                                                                                                                                                                                                                 |
| groupXI  | 2178216  | 2205216  | No | psL | ENSGACG00000005761  | -                 | proteasome activator complex                                                                                                                                                                                                                                                                                      |
| groupXI  | 5301185  | 5324185  | No | bg  | -                   | -                 | -                                                                                                                                                                                                                                                                                                                 |
| groupXI  | 8598827  | 8620930  | No | n   | -                   | -                 | -                                                                                                                                                                                                                                                                                                                 |
| groupXI  | 9111146  | 9134146  | No | psR | ENSGACG000000011028 | USP36             | -                                                                                                                                                                                                                                                                                                                 |
| groupXI  | 9111146  | 9134146  | No | psR | ENSGACG000000011059 | LGALS3BP          | membrane, protein binding, scavenger receptor activity                                                                                                                                                                                                                                                            |
| groupXI  | 9111146  | 9134146  | No | psR | ENSGACG000000011036 | TIMP2 (1 of 2)    | metalloendopeptidase inhibitor activity                                                                                                                                                                                                                                                                           |
| groupXI  | 10850527 | 10864527 | No | psL | ENSGACG000000011808 | E4F1              | intracellular, nucleic acid binding, DNA binding, zinc ion binding                                                                                                                                                                                                                                                |
| groupXI  | 10850527 | 10864527 | No | psL | ENSGACG000000011814 | NARFL             | -                                                                                                                                                                                                                                                                                                                 |
| groupXI  | 10850527 | 10864527 | No | psL | ENSGACG000000011858 | HAGH              | hydrolase activity                                                                                                                                                                                                                                                                                                |
| groupXI  | 15769060 | 15788060 | No | n   | ENSGACG000000014700 | STX1B             | intracellular protein transport, vesicle-mediated transport, membrane, protein binding, SNAP receptor activity                                                                                                                                                                                                    |
| groupXII | 3669944  | 3691945  | No | psR | ENSGACG00000004196  | TNNC2 (2 of 2)    | calcium ion binding                                                                                                                                                                                                                                                                                               |
| groupXII | 3669944  | 3691945  | No | psR | ENSGACG00000004193  | -                 | phosphatidylinositol phosphorylation, phosphatidylinositol-mediated signaling, phosphatidylinositol 3-kinase complex, binding, protein binding, transferase activity, transferring phosphorus-containing groups, 1-phosphatidylinositol-3-kinase activity, phosphotransferase activity, alcohol group as acceptor |
| groupXII | 6190053  | 6232053  | No | psR | -                   | -                 | -                                                                                                                                                                                                                                                                                                                 |
| groupXII | 8633693  | 8651913  | No | psR | ENSGACG00000006798  | ZNF362 (1 of 2)   | intracellular, zinc ion binding                                                                                                                                                                                                                                                                                   |
| groupXII | 8742616  | 8778792  | No | n   | -                   | -                 | -                                                                                                                                                                                                                                                                                                                 |
| groupXII | 9151507  | 9172507  | No | psL | ENSGACG00000007105  | PEX14             | membrane, peroxisome,                                                                                                                                                                                                                                                                                             |
| groupXII | 12193678 | 12233238 | No | n   | ENSGACG00000009813  | UBE2T             | acid-amino acid ligase activity                                                                                                                                                                                                                                                                                   |
| groupXII | 12193678 | 12233238 | No | n   | ENSGACG00000009831  | ETV7              | regulation of transcription, DNA-dependent, nucleus, sequence-specific DNA binding transcription factor activity, sequence-specific DNA binding, protein binding                                                                                                                                                  |
| groupXII | 12193678 | 12233238 | No | n   | ENSGACG00000009806  | LGR6              | G-protein coupled receptor signaling pathway, integral to membrane, protein binding                                                                                                                                                                                                                               |
| groupXII | 12382635 | 12406635 | No | psR | ENSGACG000000022656 | -                 | -                                                                                                                                                                                                                                                                                                                 |
| groupXII | 12382635 | 12406635 | No | psR | ENSGACG000000022657 | -                 | -                                                                                                                                                                                                                                                                                                                 |
| groupXII | 12382635 | 12406635 | No | psR | ENSGACG00000009922  | USP21             | ubiquitin-dependent protein catabolic process, ubiquitin thiolesterase activity                                                                                                                                                                                                                                   |
| groupXII | 12382635 | 12406635 | No | psR | ENSGACG00000009903  | UBA1              | cellular protein modification process, ATP binding, catalytic activity, small protein activating enzyme activity                                                                                                                                                                                                  |
| groupXII | 12382635 | 12406635 | No | psR | ENSGACG00000009911  | -                 | regulation of Rho protein signal transduction, intracellular, protein binding, Rho guanyl-nucleotide exchange factor activity                                                                                                                                                                                     |

|           |          |          |    |     |                    |                  |                                                                                                                                                                                                                                                                                                                                                                                                                                           |
|-----------|----------|----------|----|-----|--------------------|------------------|-------------------------------------------------------------------------------------------------------------------------------------------------------------------------------------------------------------------------------------------------------------------------------------------------------------------------------------------------------------------------------------------------------------------------------------------|
| groupXII  | 13083520 | 13091525 | No | psL | ENSGACG00000010405 | LAMA5            | signal transduction, cell adhesion, regulation of cell migration, regulation of cell adhesion, regulation of embryonic development, pectoral fin morphogenesis, fin development, fin morphogenesis, medial fin morphogenesis, protein localization, cell-cell adhesion, membrane, extracellular matrix, laminin-1 complex, basement membrane, signal transducer activity, calcium ion binding, binding, receptor binding, protein binding |
| groupXIII | 4069584  | 4168514  | No | psR | ENSGACG00000005772 | -                | proteolysis, intracellular, cysteine-type endopeptidase activity, aminopeptidase activity                                                                                                                                                                                                                                                                                                                                                 |
| groupXIII | 4069584  | 4168514  | No | psR | ENSGACG00000005837 | FAHD2B           | metabolic process, catalytic activity                                                                                                                                                                                                                                                                                                                                                                                                     |
| groupXIII | 4069584  | 4168514  | No | psR | ENSGACG00000005726 | PCNA             | regulation of DNA replication, response to bacterium, response to stress, PCNA complex, nucleus, DNA binding, DNA polymerase processivity factor activity                                                                                                                                                                                                                                                                                 |
| groupXIII | 4069584  | 4168514  | No | psR | ENSGACG00000005887 | GPAT2            | metabolic process                                                                                                                                                                                                                                                                                                                                                                                                                         |
| groupXIII | 5230249  | 5258542  | No | n   | -                  | -                | -                                                                                                                                                                                                                                                                                                                                                                                                                                         |
| groupXIII | 5806669  | 5827681  | No | n   | -                  | -                | -                                                                                                                                                                                                                                                                                                                                                                                                                                         |
| groupXIII | 6599200  | 6662200  | No | psR | ENSGACG00000007345 | GRID2            | transport, membrane, outer membrane-bounded periplasmic space, transporter activity, ionotropic glutamate receptor activity, extracellular-glutamate-gated ion channel activity                                                                                                                                                                                                                                                           |
| groupXIII | 7937987  | 7952987  | No | psR | ENSGACG00000007806 | WDR31            | protein binding                                                                                                                                                                                                                                                                                                                                                                                                                           |
| groupXIII | 7937987  | 7952987  | No | psR | ENSGACG00000007821 | G-Q-(1-of-3)     | signal transduction, G-protein coupled receptor signaling pathway, signal transducer activity, guanyl nucleotide binding                                                                                                                                                                                                                                                                                                                  |
| groupXIII | 7953754  | 8183975  | No | psR | ENSGACG00000007973 | FOXB2            | -                                                                                                                                                                                                                                                                                                                                                                                                                                         |
| groupXIII | 7953754  | 8183975  | No | psR | ENSGACG00000007980 | -                | -                                                                                                                                                                                                                                                                                                                                                                                                                                         |
| groupXIII | 7953754  | 8183975  | No | psR | ENSGACG00000007984 | PRUNE2 (2 of 2)  | -                                                                                                                                                                                                                                                                                                                                                                                                                                         |
| groupXIII | 7953754  | 8183975  | No | psR | ENSGACG00000007993 | GCNT1            | membrane, acetylglucosaminyltransferase activity                                                                                                                                                                                                                                                                                                                                                                                          |
| groupXIII | 7953754  | 8183975  | No | psR | ENSGACG00000008000 | RFK              | riboflavin biosynthetic process, riboflavin kinase activity                                                                                                                                                                                                                                                                                                                                                                               |
| groupXIII | 7953754  | 8183975  | No | psR | ENSGACG00000008074 | KIF24            | microtubule-based movement, ATP binding, protein binding, microtubule motor activity                                                                                                                                                                                                                                                                                                                                                      |
| groupXIII | 7953754  | 8183975  | No | psR | ENSGACG00000008080 | RFESD (1 of 2)   | oxidation-reduction process, oxidoreductase activity, 2 iron, 2 sulfur cluster binding                                                                                                                                                                                                                                                                                                                                                    |
| groupXIII | 7953754  | 8183975  | No | psR | ENSGACG00000008097 | PSMD9            | protein binding                                                                                                                                                                                                                                                                                                                                                                                                                           |
| groupXIII | 7953754  | 8183975  | No | psR | ENSGACG00000008103 | -                | DNA binding, zinc ion binding                                                                                                                                                                                                                                                                                                                                                                                                             |
| groupXIII | 7953754  | 8183975  | No | psR | ENSGACG00000007821 | G-Q-(1-of-3)     | signal transduction, G-protein coupled receptor signaling pathway, signal transducer activity, guanyl nucleotide binding                                                                                                                                                                                                                                                                                                                  |
| groupXIII | 7953754  | 8183975  | No | psR | ENSGACG00000007900 | -                | signal transduction, G-protein coupled receptor signaling pathway, signal transducer activity, guanyl nucleotide binding                                                                                                                                                                                                                                                                                                                  |
| groupXIII | 7953754  | 8183975  | No | psR | ENSGACG00000008043 | UBAP2 (2 of 2)   | protein binding                                                                                                                                                                                                                                                                                                                                                                                                                           |
| groupXIII | 7953754  | 8183975  | No | psR | ENSGACG00000008083 | GTF2H3           | regulation of transcription, DNA-dependent, DNA repair, core TFIID complex                                                                                                                                                                                                                                                                                                                                                                |
| groupXIII | 7953754  | 8183975  | No | psR | ENSGACG00000007925 | VPS13A           | protein localization                                                                                                                                                                                                                                                                                                                                                                                                                      |
| groupXIII | 7953754  | 8183975  | No | psR | ENSGACG00000008029 | PCSK5            | proteolysis, regulation of cell growth, extracellular region, protein binding, serine-type endopeptidase activity, insulin-like growth factor binding                                                                                                                                                                                                                                                                                     |
| groupXIII | 10120445 | 10196445 | No | psR | ENSGACG00000010214 | EDIL3            | cell adhesion, calcium ion binding, protein binding                                                                                                                                                                                                                                                                                                                                                                                       |
| groupXIII | 12480257 | 12544360 | No | psR | -                  | -                | -                                                                                                                                                                                                                                                                                                                                                                                                                                         |
| groupXV   | 9672357  | 9797450  | No | psR | ENSGACG00000010625 | WDR20 (2 of 2)   | protein binding                                                                                                                                                                                                                                                                                                                                                                                                                           |
| groupXV   | 9672357  | 9797450  | No | psR | ENSGACG00000010657 | ELAVL1 (1 of 2)  | nucleic acid binding, RNA binding                                                                                                                                                                                                                                                                                                                                                                                                         |
| groupXV   | 9672357  | 9797450  | No | psR | ENSGACG00000010673 | -                | dicarboxylic acid transport, membrane, sodium:dicarboxylate symporter activity                                                                                                                                                                                                                                                                                                                                                            |
| groupXV   | 9672357  | 9797450  | No | psR | ENSGACG00000010701 | DIRAS1 (1 of 2)  | signal transduction, GTP catabolic process, small GTPase mediated signal transduction, intracellular protein transport, nucleocytoplasmic transport, protein transport, intracellular, GTPase activity, GTP binding                                                                                                                                                                                                                       |
| groupXV   | 9672357  | 9797450  | No | psR | ENSGACG00000010717 | -                | protein binding                                                                                                                                                                                                                                                                                                                                                                                                                           |
| groupXV   | 9672357  | 9797450  | No | psR | ENSGACG00000010718 | -                | -                                                                                                                                                                                                                                                                                                                                                                                                                                         |
| groupXV   | 9672357  | 9797450  | No | psR | ENSGACG00000010724 | -                | defense response, DNA binding, protein binding                                                                                                                                                                                                                                                                                                                                                                                            |
| groupXV   | 9672357  | 9797450  | No | psR | ENSGACG00000010727 | -                | -                                                                                                                                                                                                                                                                                                                                                                                                                                         |
| groupXV   | 9672357  | 9797450  | No | psR | ENSGACG00000010634 | -                | -                                                                                                                                                                                                                                                                                                                                                                                                                                         |
| groupXV   | 9672357  | 9797450  | No | psR | ENSGACG00000010688 | REEP6            | -                                                                                                                                                                                                                                                                                                                                                                                                                                         |
| groupXV   | 9672357  | 9797450  | No | psR | ENSGACG00000010706 | GADD45B (2 of 2) | somitogenesis                                                                                                                                                                                                                                                                                                                                                                                                                             |
| groupXV   | 9672357  | 9797450  | No | psR | ENSGACG00000010720 | IGKC (24 of 24)  | protein binding                                                                                                                                                                                                                                                                                                                                                                                                                           |
| groupXV   | 9672357  | 9797450  | No | psR | ENSGACG00000010728 | -                | protein binding                                                                                                                                                                                                                                                                                                                                                                                                                           |
| groupXV   | 11640529 | 11669804 | No | psR | ENSGACG00000011810 | L2HGDH           | oxidoreductase activity                                                                                                                                                                                                                                                                                                                                                                                                                   |

|            |          |          |    |     |                     |                   |                                                                                                                                                                                                                  |
|------------|----------|----------|----|-----|---------------------|-------------------|------------------------------------------------------------------------------------------------------------------------------------------------------------------------------------------------------------------|
| groupXV    | 11640529 | 11669804 | No | psR | ENSGACG00000011842  | CDKL1             | protein phosphorylation, ATP binding, protein kinase activity, transferase activity, transferring phosphorus-containing groups, protein serine/threonine kinase activity                                         |
| groupXV    | 11640529 | 11669804 | No | psR | ENSGACG00000011836  | ATP5S             | -                                                                                                                                                                                                                |
| groupXV    | 11640529 | 11669804 | No | psR | ENSGACG00000011850  | MAP4K5            | protein phosphorylation, ATP binding, protein kinase activity, transferase activity, transferring phosphorus-containing groups, protein serine/threonine kinase activity, small GTPase regulator activity        |
| groupXV    | 14264687 | 14324687 | No | psR | ENSGACG00000012967  | MATN3 (2 of 2)    | calcium ion binding, protein binding                                                                                                                                                                             |
| groupXV    | 14264687 | 14324687 | No | psR | ENSGACG00000012974  | ODC1              | catalytic activity                                                                                                                                                                                               |
| groupXV    | 14264687 | 14324687 | No | psR | ENSGACG00000013000  | NOL10             | -                                                                                                                                                                                                                |
| groupXV    | 14264687 | 14324687 | No | psR | ENSGACG00000013004  | ATP6V1C2          | ATP hydrolysis coupled proton transport, proton-transporting V-type ATPase, V1 domain, hydrolase activity, acting on acid anhydrides, catalyzing transmembrane movement of substances                            |
| groupXV    | 14264687 | 14324687 | No | psR | ENSGACG00000012959  | WDR35             | protein binding                                                                                                                                                                                                  |
| groupXV    | 16008051 | 16059082 | No | bg  | ENSGACG00000013340  | KCNK16            | -                                                                                                                                                                                                                |
| groupXV    | 16008051 | 16059082 | No | bg  | ENSGACG00000013319  | RAB3GAP2          | translation, tRNA aminoacylation for protein translation, cytoplasm, ATP binding, nucleotide binding, aminoacyl-tRNA ligase activity                                                                             |
| groupXV    | 16008051 | 16059082 | No | bg  | ENSGACG00000013332  | KCNK5 (1 of 2)    | -                                                                                                                                                                                                                |
| groupXV    | 16118354 | 16187408 | No | psR | ENSGACG00000013366  | DAAM2             | vesicle-mediated transport, actin cytoskeleton organization, cellular component organization, membrane, binding, actin binding, Rho GTPase binding                                                               |
| groupXVI   | 3823972  | 3847046  | No | psL | -                   | -                 | -                                                                                                                                                                                                                |
| groupXVI   | 9255836  | 9318530  | No | psR | ENSGACG00000004159  | -                 | membrane, tight junction, structural molecule activity                                                                                                                                                           |
| groupXVI   | 9255836  | 9318530  | No | psR | ENSGACG00000004162  | -                 | membrane, tight junction, structural molecule activity                                                                                                                                                           |
| groupXVI   | 9255836  | 9318530  | No | psR | ENSGACG00000004166  | DNAJC3            | translation, intracellular, ribosome, protein binding, structural constituent of ribosome, heat shock protein binding                                                                                            |
| groupXVI   | 9255836  | 9318530  | No | psR | ENSGACG00000004126  | ABCC4 (1 of 4)    | transport, transmembrane transport, integral to membrane, ATP binding, nucleotide binding, ATPase activity, ATPase activity, coupled to transmembrane movement of substances, nucleoside-triphosphatase activity |
| groupXVI   | 9255836  | 9318530  | No | psR | ENSGACG00000004153  | CLDN10 (2 of 2)   | membrane, tight junction, structural molecule activity, membrane, tight junction, structural molecule activity                                                                                                   |
| groupXVI   | 9848880  | 9876880  | No | n   | ENSGACG00000004584  | KIAA1715 (1 of 2) | -                                                                                                                                                                                                                |
| groupXVI   | 9848880  | 9876880  | No | n   | ENSGACG00000004579  | -                 | -                                                                                                                                                                                                                |
| groupXVII  | 4954228  | 4982586  | No | psR | ENSGACG00000006306  | TUBB1             | GTP catabolic process, microtubule-based process, protein polymerization, protein complex, microtubule, GTPase activity, GTP binding                                                                             |
| groupXVII  | 4954228  | 4982586  | No | psR | ENSGACG000000022571 | -                 | -                                                                                                                                                                                                                |
| groupXVII  | 4954228  | 4982586  | No | psR | ENSGACG00000006335  | SLMO2 (1 of 2)    | -                                                                                                                                                                                                                |
| groupXVII  | 4954228  | 4982586  | No | psR | ENSGACG00000006354  | AURKA             | protein phosphorylation, ATP binding, protein kinase activity, transferase activity, transferring phosphorus-containing groups, protein serine/threonine kinase activity                                         |
| groupXVII  | 4954228  | 4982586  | No | psR | ENSGACG00000006379  | SLC32A1 (1 of 2)  | -                                                                                                                                                                                                                |
| groupXVII  | 4954228  | 4982586  | No | psR | ENSGACG00000006249  | -                 | G-protein coupled receptor signaling pathway, signal transducer activity, guanyl nucleotide binding                                                                                                              |
| groupXVII  | 6004396  | 6085437  | No | n   | ENSGACG00000007297  | -                 | -                                                                                                                                                                                                                |
| groupXVII  | 6004396  | 6085437  | No | n   | ENSGACG00000007304  | -                 | -                                                                                                                                                                                                                |
| groupXVII  | 6004396  | 6085437  | No | n   | ENSGACG00000007307  | -                 | -                                                                                                                                                                                                                |
| groupXVII  | 6004396  | 6085437  | No | n   | ENSGACG00000007311  | -                 | -                                                                                                                                                                                                                |
| groupXVII  | 6004396  | 6085437  | No | n   | ENSGACG00000007333  | HRH1              | G-protein coupled receptor signaling pathway, integral to membrane                                                                                                                                               |
| groupXVII  | 6004396  | 6085437  | No | n   | ENSGACG00000007265  | SLC6A1 (1 of 2)   | neurotransmitter transport, integral to membrane, neurotransmitter:sodium symporter activity                                                                                                                     |
| groupXVII  | 6004396  | 6085437  | No | n   | ENSGACG00000007339  | ATG7              | autophagy, cytoplasm, catalytic activity                                                                                                                                                                         |
| groupXVII  | 6113126  | 6133126  | No | n   | ENSGACG00000007347  | VGLL4             | -                                                                                                                                                                                                                |
| groupXVII  | 6198066  | 6225066  | No | n   | ENSGACG00000007391  | -                 | protein phosphorylation, ATP binding, protein kinase activity, transferase activity, transferring phosphorus-containing groups, protein serine/threonine kinase activity                                         |
| groupXVII  | 6198066  | 6225066  | No | n   | ENSGACG00000007398  | FOXJ3 (1 of 2)    | regulation of transcription, DNA-dependent, sequence-specific DNA binding transcription factor activity, sequence-specific DNA binding                                                                           |
| groupXVIII | 1218091  | 1247566  | No | psL | ENSGACG00000004653  | -                 | -                                                                                                                                                                                                                |
| groupXVIII | 1218091  | 1247566  | No | psL | ENSGACG00000004657  | CNST (1 of 3)     | -                                                                                                                                                                                                                |
| groupXVIII | 1218091  | 1247566  | No | psL | ENSGACG00000004546  | S-P25-(1-of-2)    | vesicle-mediated transport, membrane, protein binding                                                                                                                                                            |

|            |          |          |    |     |                     |                  |                                                                                                                                                                                                                          |
|------------|----------|----------|----|-----|---------------------|------------------|--------------------------------------------------------------------------------------------------------------------------------------------------------------------------------------------------------------------------|
| groupXVIII | 1218091  | 1247566  | No | psL | ENSGACG00000004618  | -                | oxidation-reduction process, metal ion binding, protein binding, oxidoreductase activity, acting on single donors with incorporation of molecular oxygen, incorporation of two atoms of oxygen                           |
| groupXVIII | 1218091  | 1247566  | No | psL | ENSGACG00000004658  | CNST (3 of 3)    | -                                                                                                                                                                                                                        |
| groupXVIII | 1445479  | 1482479  | No | psR | ENSGACG00000004803  | -                | nucleic acid binding                                                                                                                                                                                                     |
| groupXVIII | 1445479  | 1482479  | No | psR | ENSGACG00000004820  | TDRD6            | nucleic acid binding                                                                                                                                                                                                     |
| groupXVIII | 1445479  | 1482479  | No | psR | ENSGACG00000004893  | INTS9            | -                                                                                                                                                                                                                        |
| groupXVIII | 1445479  | 1482479  | No | psR | ENSGACG00000004825  | PLA2G7           | -                                                                                                                                                                                                                        |
| groupXVIII | 1445479  | 1482479  | No | psR | ENSGACG00000004784  | VSNL1 (1 of 2)   | calcium ion binding                                                                                                                                                                                                      |
| groupXVIII | 1531272  | 1539933  | No | bg  | -                   | -                | -                                                                                                                                                                                                                        |
| groupXVIII | 8300041  | 8329296  | No | psL | ENSGACG00000008721  | -                | signal transduction, keratinization, membrane, cytoplasm, signal transducer activity, actin binding, protein binding                                                                                                     |
| groupXVIII | 9029949  | 9044303  | No | n   | ENSGACG00000009366  | PREP             | proteolysis, serine-type peptidase activity, serine-type endopeptidase activity, , proteolysis, serine-type peptidase activity, serine-type endopeptidase activity                                                       |
| groupXX    | 949459   | 1007926  | No | n   | ENSGACG00000003524  | OSR2             | kidney development, negative regulation of transcription from RNA polymerase II promoter, pronephros development, intracellular, zinc ion binding                                                                        |
| groupXX    | 949459   | 1007926  | No | n   | ENSGACG00000003526  | VPS13B (3 of 3)  | -                                                                                                                                                                                                                        |
| groupXX    | 4143873  | 4157873  | No | psR | ENSGACG00000005481  | NFATC1 (2 of 2)  | regulation of transcription, DNA-dependent, nucleus, sequence-specific DNA binding transcription factor activity, protein binding                                                                                        |
| groupXX    | 10858034 | 10878034 | No | n   | ENSGACG00000009299  | ABCB4            | transport, transmembrane transport, integral to membrane, ATP binding, nucleotide binding, ATPase activity, ATPase activity, coupled to transmembrane movement of substances, nucleoside-triphosphatase activity         |
| groupXX    | 10858034 | 10878034 | No | n   | ENSGACG00000009281  | CROT (1 of 2)    | -                                                                                                                                                                                                                        |
| groupXX    | 11339915 | 11367371 | No | n   | -                   | -                | -                                                                                                                                                                                                                        |
| groupXX    | 11513416 | 11558416 | No | psR | ENSGACG00000009790  | -                | -                                                                                                                                                                                                                        |
| groupXX    | 11513416 | 11558416 | No | psR | ENSGACG00000009825  | -                | binding                                                                                                                                                                                                                  |
| groupXX    | 11513416 | 11558416 | No | psR | ENSGACG00000009840  | USP5             | ubiquitin-dependent protein catabolic process, zinc ion binding, protein binding, ubiquitin thiolesterase activity                                                                                                       |
| groupXX    | 11513416 | 11558416 | No | psR | ENSGACG00000009793  | COPS7A           | protein binding                                                                                                                                                                                                          |
| groupXX    | 11513416 | 11558416 | No | psR | ENSGACG00000009832  | -                | protein binding                                                                                                                                                                                                          |
| groupXX    | 11696205 | 11759226 | No | n   | ENSGACG000000010128 | -                | binding                                                                                                                                                                                                                  |
| groupXX    | 11696205 | 11759226 | No | n   | ENSGACG000000010169 | TAPBPL           | protein binding                                                                                                                                                                                                          |
| groupXX    | 11696205 | 11759226 | No | n   | ENSGACG000000010179 | VAMP1            | vesicle-mediated transport, integral to membrane                                                                                                                                                                         |
| groupXX    | 11696205 | 11759226 | No | n   | ENSGACG000000010193 | MRPL51           | -                                                                                                                                                                                                                        |
| groupXX    | 11696205 | 11759226 | No | n   | ENSGACG000000010195 | PLEKHG6          | regulation of Rho protein signal transduction, intracellular, Rho guanyl-nucleotide exchange factor activity                                                                                                             |
| groupXX    | 11696205 | 11759226 | No | n   | ENSGACG000000010200 | TNFRSF1A         | signal transduction, binding, protein binding                                                                                                                                                                            |
| groupXX    | 11696205 | 11759226 | No | n   | ENSGACG000000010125 | RBP5             | binding                                                                                                                                                                                                                  |
| groupXX    | 11696205 | 11759226 | No | n   | ENSGACG000000010132 | C1R              | proteolysis, calcium ion binding, catalytic activity, protein binding, serine-type endopeptidase activity                                                                                                                |
| groupXX    | 12093612 | 12156612 | No | psR | ENSGACG000000010597 | ATG12            | autophagic vacuole assembly, cytoplasm                                                                                                                                                                                   |
| groupXX    | 12093612 | 12156612 | No | psR | ENSGACG000000010601 | -                | calcium ion binding                                                                                                                                                                                                      |
| groupXX    | 12093612 | 12156612 | No | psR | ENSGACG000000010614 | -                | protein binding                                                                                                                                                                                                          |
| groupXX    | 12093612 | 12156612 | No | psR | ENSGACG000000010622 | CCDC106 (1 of 2) | -                                                                                                                                                                                                                        |
| groupXX    | 12093612 | 12156612 | No | psR | ENSGACG000000010632 | U2AF2            | mRNA processing, nucleus, nucleic acid binding, RNA binding                                                                                                                                                              |
| groupXX    | 12093612 | 12156612 | No | psR | ENSGACG000000010639 | CACNG8 (2 of 2)  | membrane                                                                                                                                                                                                                 |
| groupXX    | 12438628 | 12484628 | No | psL | ENSGACG000000011464 | PRPF31           | nuclear mRNA splicing, via spliceosome, retina development in camera-type eye                                                                                                                                            |
| groupXX    | 12438628 | 12484628 | No | psL | ENSGACG000000011504 | -                | -                                                                                                                                                                                                                        |
| groupXX    | 12438628 | 12484628 | No | psL | ENSGACG000000011489 | CNOT3 (2 of 2)   | regulation of transcription, DNA-dependent, nucleus, nucleotide binding                                                                                                                                                  |
| groupXX    | 12438628 | 12484628 | No | psL | ENSGACG000000011507 | -                | signal transduction, filopodium assembly, protein binding, cytoskeletal adaptor activity, SH3 domain binding                                                                                                             |
| groupXX    | 12506449 | 12533449 | No | psL | ENSGACG000000011540 | SPHK2            | protein kinase C-activating G-protein coupled receptor signaling pathway, diacylglycerol kinase activity                                                                                                                 |
| groupXX    | 12506449 | 12533449 | No | psL | ENSGACG000000011594 | -                | integral to membrane                                                                                                                                                                                                     |
| groupXX    | 12506449 | 12533449 | No | psL | ENSGACG000000011547 | RPL18            | translation, intracellular, ribosome, structural constituent of ribosome                                                                                                                                                 |
| groupXX    | 12506449 | 12533449 | No | psL | ENSGACG000000011600 | MYH14            | regulation of transcription, DNA-dependent, myosin complex, sequence-specific DNA binding transcription factor activity, motor activity, ATP binding, sequence-specific DNA binding, nucleotide binding, protein binding |

|          |          |          |    |     |                    |                 |                                                                                                                                                                                                                                                                                                                                                                                                                                                                                                                                                                                                                                                                                                                                 |
|----------|----------|----------|----|-----|--------------------|-----------------|---------------------------------------------------------------------------------------------------------------------------------------------------------------------------------------------------------------------------------------------------------------------------------------------------------------------------------------------------------------------------------------------------------------------------------------------------------------------------------------------------------------------------------------------------------------------------------------------------------------------------------------------------------------------------------------------------------------------------------|
| groupXX  | 14247752 | 14283752 | No | n   | ENSGACG00000012632 | C3orf75         | -                                                                                                                                                                                                                                                                                                                                                                                                                                                                                                                                                                                                                                                                                                                               |
| groupXX  | 14247752 | 14283752 | No | n   | ENSGACG00000012618 | SCAP            | integral to membrane, protein binding                                                                                                                                                                                                                                                                                                                                                                                                                                                                                                                                                                                                                                                                                           |
| groupXX  | 14247752 | 14283752 | No | n   | ENSGACG00000012641 | -               | -                                                                                                                                                                                                                                                                                                                                                                                                                                                                                                                                                                                                                                                                                                                               |
| groupXX  | 16432445 | 16480445 | No | psR | -                  | -               | -                                                                                                                                                                                                                                                                                                                                                                                                                                                                                                                                                                                                                                                                                                                               |
| groupXX  | 17944465 | 18042465 | No | n   | ENSGACG00000014023 | POPDC3          | membrane                                                                                                                                                                                                                                                                                                                                                                                                                                                                                                                                                                                                                                                                                                                        |
| groupXX  | 17944465 | 18042465 | No | n   | ENSGACG00000014027 | CNIH4           | intracellular signal transduction, membrane                                                                                                                                                                                                                                                                                                                                                                                                                                                                                                                                                                                                                                                                                     |
| groupXX  | 17944465 | 18042465 | No | n   | ENSGACG00000014036 | WDR26 (2 of 2)  | protein binding                                                                                                                                                                                                                                                                                                                                                                                                                                                                                                                                                                                                                                                                                                                 |
| groupXX  | 17944465 | 18042465 | No | n   | ENSGACG00000014009 | -               | protein binding                                                                                                                                                                                                                                                                                                                                                                                                                                                                                                                                                                                                                                                                                                                 |
| groupXX  | 17944465 | 18042465 | No | n   | ENSGACG00000014015 | BVES            | membrane                                                                                                                                                                                                                                                                                                                                                                                                                                                                                                                                                                                                                                                                                                                        |
| groupXX  | 17944465 | 18042465 | No | n   | ENSGACG00000014012 | VEGFA (1 of 2)  | blood vessel development, regulation of heart contraction, motor axon guidance, sprouting angiogenesis, vasculature development, artery morphogenesis, blood vessel endothelial cell proliferation involved in sprouting angiogenesis, regulation of angioblast cell migration involved in selective angioblast sprouting, angioblast cell migration from lateral mesoderm to midline, thyroid gland development, activation of phospholipase C activity, protein kinase B signaling cascade, angiogenesis, hemopoiesis, phosphorylation, vascular endothelial growth factor receptor signaling pathway, pronephros development, patterning of blood vessels, vasculogenesis, membrane, growth factor activity, protein binding |
| groupXXI | 5490371  | 5539913  | No | n   | ENSGACG00000002473 | -               | -                                                                                                                                                                                                                                                                                                                                                                                                                                                                                                                                                                                                                                                                                                                               |
| groupXXI | 5490371  | 5539913  | No | n   | ENSGACG00000002461 | CNT-P2-(1-of-2) | cell adhesion                                                                                                                                                                                                                                                                                                                                                                                                                                                                                                                                                                                                                                                                                                                   |
| groupXXI | 7544330  | 7566465  | No | bg  | ENSGACG00000003081 | PAN3            | protein phosphorylation, ATP binding, transferase activity, transferring phosphorus-containing groups, protein serine/threonine kinase activity                                                                                                                                                                                                                                                                                                                                                                                                                                                                                                                                                                                 |
| groupXXI | 7544330  | 7566465  | No | bg  | ENSGACG00000003090 | -               | protein phosphorylation, transmembrane receptor protein tyrosine kinase signaling pathway, membrane, ATP binding, protein kinase activity, transferase activity, transferring phosphorus-containing groups, transmembrane receptor protein tyrosine kinase activity                                                                                                                                                                                                                                                                                                                                                                                                                                                             |
| groupXXI | 7544330  | 7566465  | No | bg  | ENSGACG00000003094 | -               | protein phosphorylation, protein kinase activity, transferase activity, transferring phosphorus-containing groups                                                                                                                                                                                                                                                                                                                                                                                                                                                                                                                                                                                                               |
| groupXXI | 7544330  | 7566465  | No | bg  | ENSGACG00000003095 | PRHOXNB         | -                                                                                                                                                                                                                                                                                                                                                                                                                                                                                                                                                                                                                                                                                                                               |
| groupXXI | 7544330  | 7566465  | No | bg  | ENSGACG00000003099 | PDX1            | regulation of transcription, DNA-dependent, pancreas development, determination of pancreatic left/right asymmetry, determination of liver left/right asymmetry, determination of digestive tract left/right asymmetry, endocrine pancreas development, nucleus, sequence-specific DNA binding transcription factor activity, sequence-specific DNA binding, protein binding                                                                                                                                                                                                                                                                                                                                                    |

Type refers to categories inferred by signatures of selection: n reduced gene flow, bg background selection, psL adaptation to lake, psR adaptation to river.
